# Supplementary material for: Photoelectrochemical Ni-Catalyzed Cross-Coupling of Aryl Bromides with Amine at Ultra-Low Potential
Source: Research Square preprint supplement (doi:10.21203/rs.3.rs-4144126/v1), 2024-04-16

Supporting Information

**Photoelectrochemical Ni-Catalyzed Cross-Coupling of Aryl Bromides with Amine at Ultra-Low Potential**

Jinghao Wang,‡ Siyang Li,‡ Caoyu Yang, Huiwen Gao, Lulu Zuo, Zhiyu Guo, Pengqi Yang, Yuheng Jiang, Jian Li* Li-Zhu Wu* and Zhiyong Tang*

*Email of corresponding author: lijian1991@mail.ipc.ac.cn[*lzwu@mail.ipc.ac.cn*](mailto:lzwu@mail.ipc.ac.cn)[*zytang@nanoctr.cn*](mailto:zytang@nanoctr.cn)

[1. Materials and methods 2](#_Toc161848629)

[2. General experimental procedures 3](#_Toc161848630)

[3. Comparison between different methods 4](#_Toc161848631)

[4. Linear sweep voltammograms 5](#_Toc161848632)

[5. Cyclic voltammograms 6](#_Toc161848633)

[6. Control experiments and radical trapping experiment 8](#_Toc161848634)

[7. Computational details 10](#_Toc161848635)

[8. References 32](#_Toc161848636)

[9. Characterization data for all products 34](#_Toc161848637)

[10. 1H and 13C Spectra of all products 48](#_Toc161848638)

1. Materials and methods

1H NMR spectra were recorded using a Bruker Avance DPX 400 MHz instrument with tetramethylsilane (TMS) as an internal standard. 13C NMR spectra were obtained at 101 MHz and referenced to the internal solvent signals. Multiplicities were indicated, where s (singlet), d (doublet), t (triplet), q (quartet), m (multiplet) and coupling constants (J) were in Hertz (Hz). Electrospray ionization (ESI) high-resolution mass spectra (HR-MS) were recorded on a Q EXACTIVE (Thermo Fisher) mass spectrometer. Commercially available reagents and solvents were used without further purification. The linear sweep voltammetry and cyclic voltammetry curves were achieved on a CHI 760E potentiostat. Photoelectrochemical experiments were carried out with 465 nm blue light emitting diode (LED). Figure S1 was the schematic diagram for the reaction setup. Thin layer chromatography (TLC) was attained with glass 0.25 mm silica gel plates. Flash chromatography columns were packed with 200-300 mesh silica gel in petroleum ether.


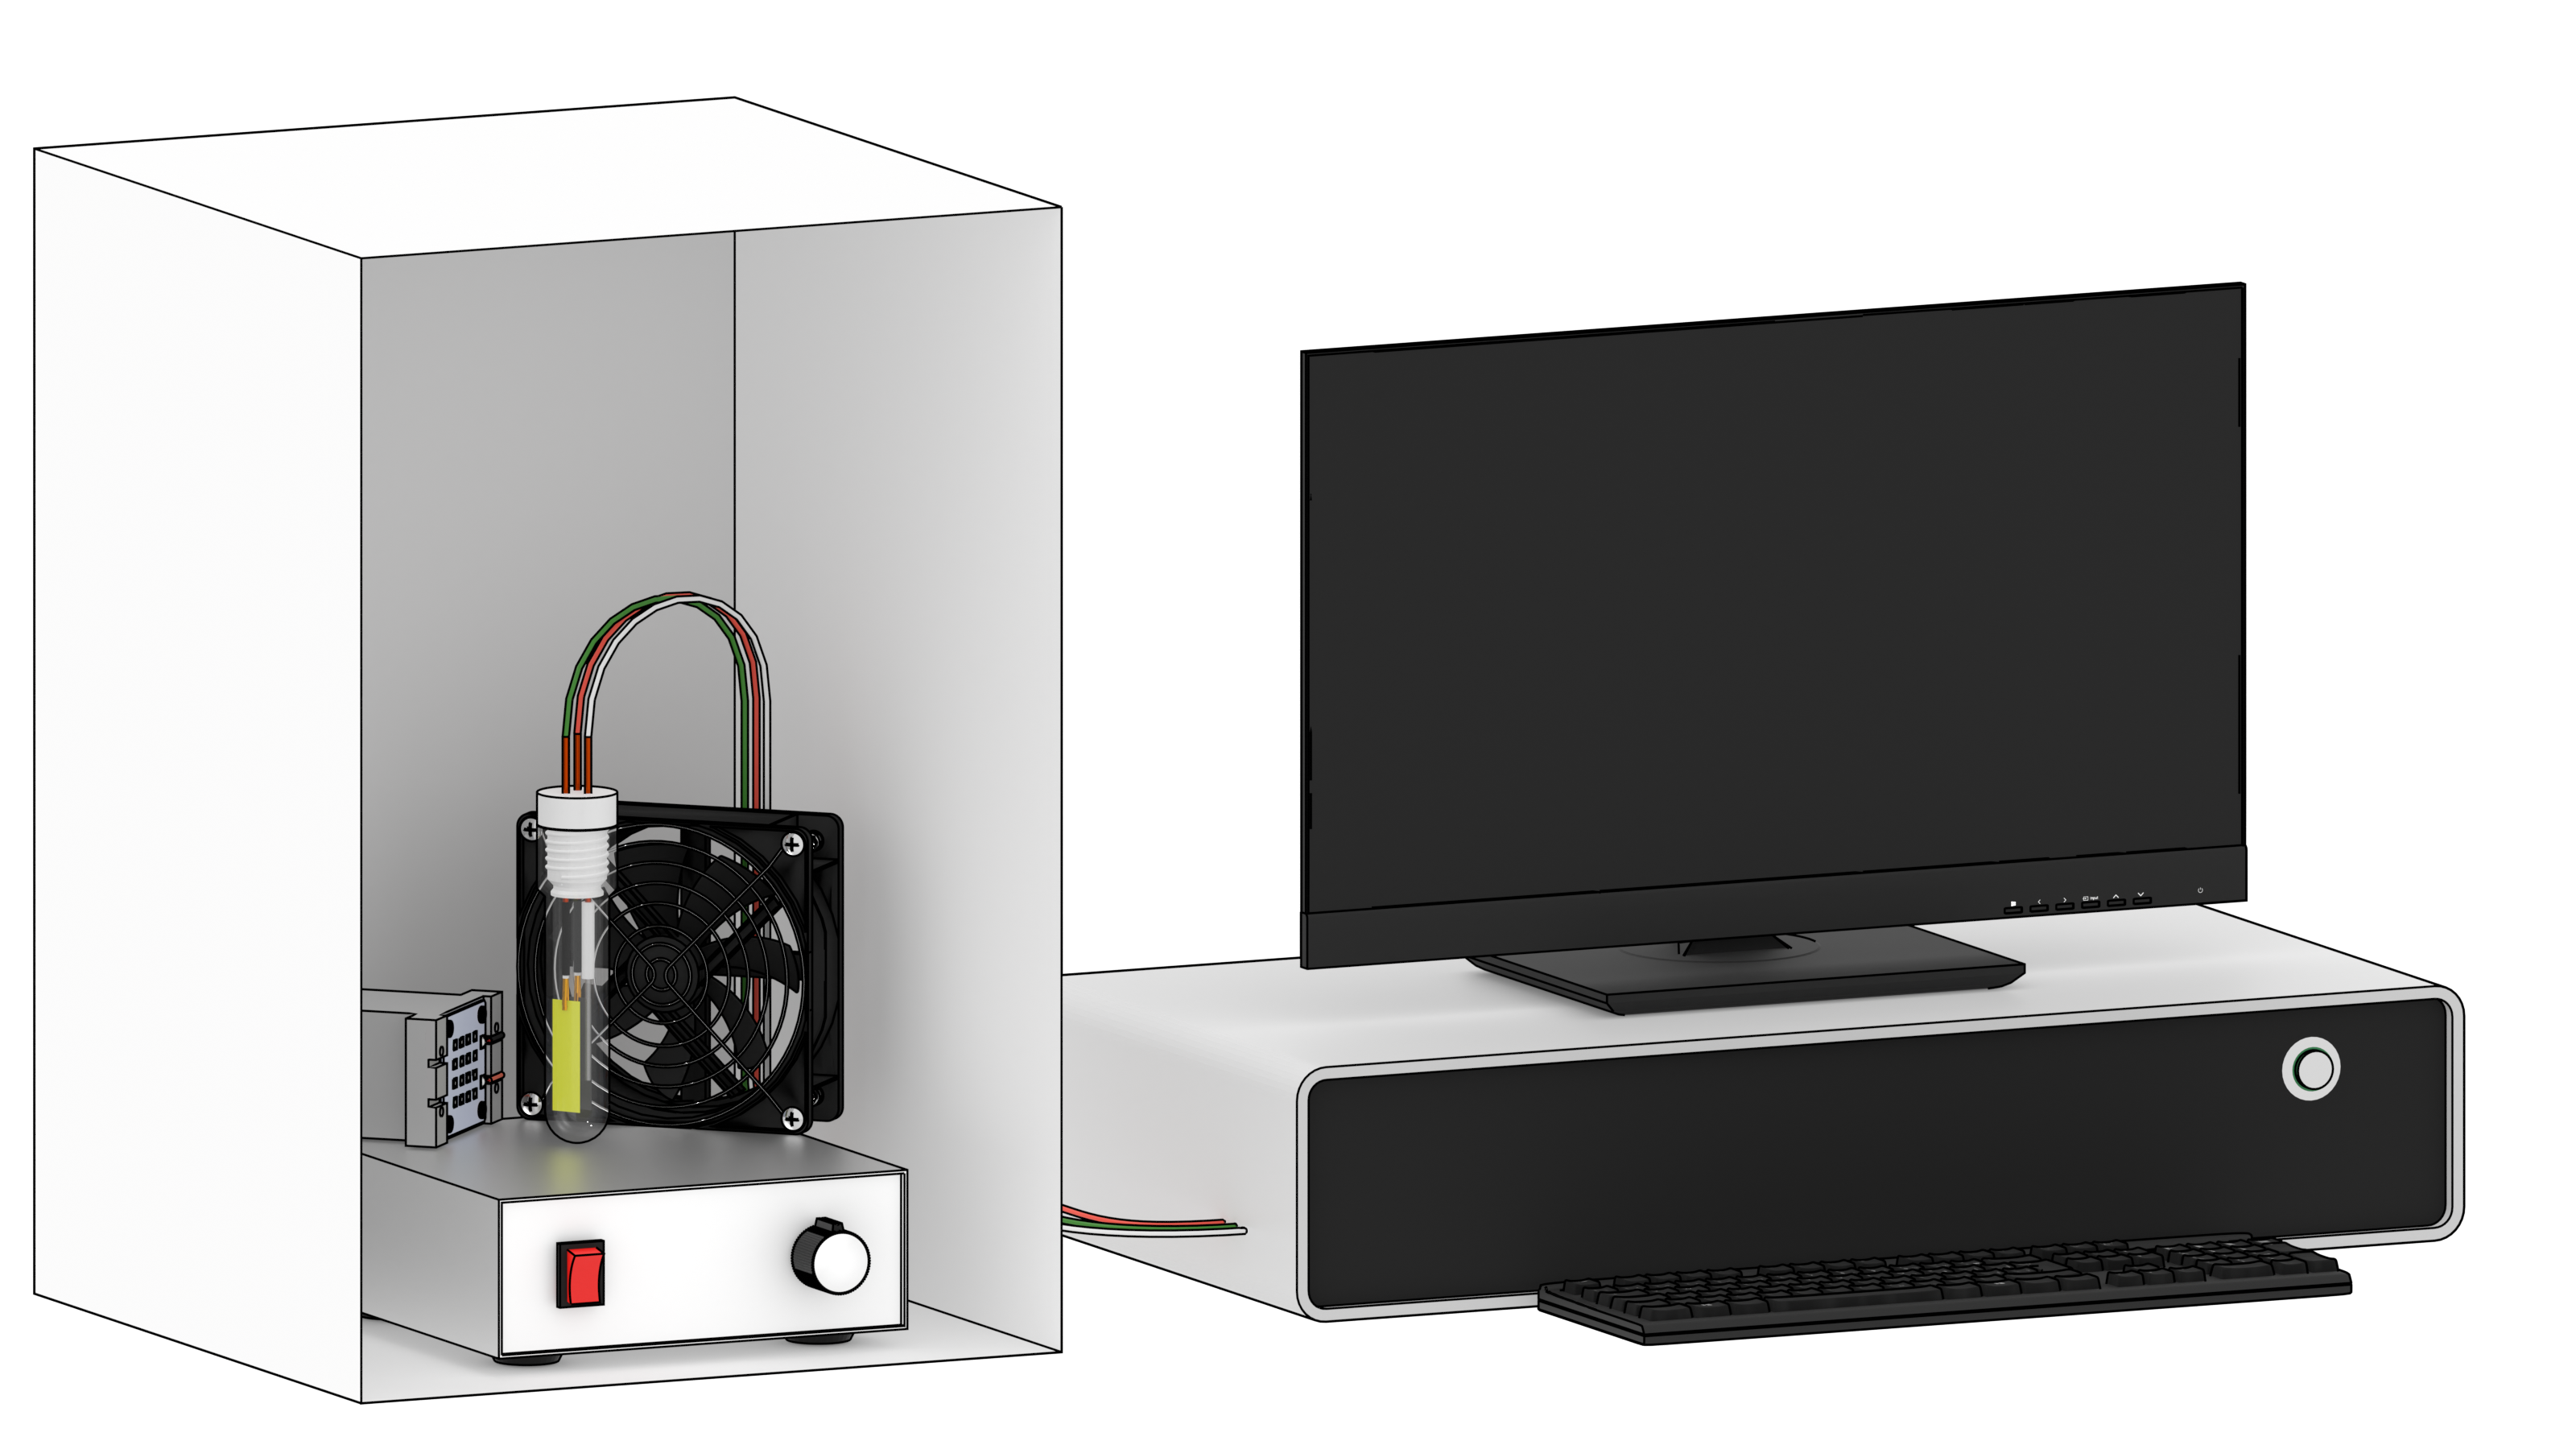


**Figure S1.** Schematic diagram of home-made reaction setup for photoelectrocatalysis.

2. General experimental procedures

**2.1 Preparation of BiVO4 electrode**

The BiVO4 electrode was prepared by a electrodeposition-calcination method. First, fluorine-doped tin oxide (FTO) substrates were sonicated with acetone, ethanol and water for 30 min each. Bi(NO3)3·5H2O (0.04 M) and KI (0.4 M) were dissolved in 60 mL distilled water to form a clear solution. Then, HNO3 was added to adjust pH value to 1.7. Next, 0.23 M p-benzoquinone ethanol solution (25 mL) was added to above mixed solution and stirred vigorously for 20 min. The electrodeposition was carried out in a three-electrode cell using a constant potential of -0.1 V *vs* Ag/AgCl for 600 seconds at room temperature, where FTO, Pt and Ag/AgCl were employed as working electrode, counter electrode and reference electrode, respectively. After the electrodeposition, a uniform red-brown film (BiOI) was formed on the FTO substrate. Then, 200 μL of a DMSO solution containing 0.2 M vanadyl acetylacetonate was placed on the BiOI electrode, and the electrode was calcined at 450°C for 1 h with a heating rate of 2°C min-1. After being cooled down to room temperature, the electrode was soaked in 1.0 M NaOH solution to remove the excess V2O5. Finally, the BiVO4 electrode was rinsed with distilled water and dried with N2 gas.

**2.2 General procedure for** **the photoelectrocatalysis**

In a nitrogen-filled glove box, an oven-dried photoelectrochemical cell equipped with a stir bar was charged with NiBr2·glyme (0.02 mmol, 10 mol%), dtbbpy (0.03 mmol, 15 mol%), DABCO (0.4 mmol, 2 equiv), LiBr (0.2 M), methyl 4-bromobenzoate (0.2 mmol) and acetone (5 mL). The mixture was stirred at room temperature for 1 minute. Then, N-methylaniline (0.4 mmol, 2 equiv) was added. The vial was sealed with the home-made cap, which was equipped with a BiVO4 photoanode (1.2 cm × 2.5 cm), a nickel foam cathode (1.0 cm × 3.0 cm) and an Ag/AgNO3 reference electrode, and then brought out of the glove box. After pre-stirring the resulting mixture for 1 minute, photoelectrocatalysis was performed at a constant potential of -0.4 V *vs*. Ag/AgNO3 for 12 h. When the reaction was finished, the entire reaction mixture was then transferred to a silica gel column and purified with a mixture of hexane and ethyl acetate to give the corresponding products.

3. Comparison between different methods

**Table S1.** Species proportion, yield and selectivity of photochemical (PC), electrochemical (EC), and photoelectrochemical (PEC) Ni catalysis.

| Method | Proportion (%) | | | Yield of Product (%) | Selectivity (%) |
| --- | --- | --- | --- | --- | --- |
| Reactant (**2**) | By-products | Product (**3**) |
| PC | 100 | 0 | 0 | 0 | N/A |
| EC | 74.7 | 9.7 | 15.6 | 15.6 | 61.8 |
| PEC | 10.0 | 8.0 | 82.0 | 82.0 | 89.1 |

Reaction conditions: PC: standard condition without electricity; EC: standard condition without light irradiation, the bias was raised to +1.5 V vs. Ag/AgNO3; PEC: standard condition: BiVO4 photoanode (1.2 cm × 2.5 cm), Ni foam cathode (1.0 cm ×3.0 cm), Ag/AgNO3 as reference electrode, **1** (0.4 mmol), **2** (0.2 mmol), LiBr (0.2 M), NiBr2·glyme (0.02 mmol), dtbbpy (0.03 mmol), DABCO (2 equiv), acetone (5.0 mL), E = –0.4 V vs Ag/AgNO3, blue LED,12 h, N2.

The proportion of species X (X = **2**, **3**) was determined by the following formula:

where was the amount of substance of species X determined by 1H NMR spectrum, and was the amount of substance of the reactant **2** before the reaction.

The proportion of by-products was estimated using the following formula:

The yield of product **3** was equivalent with the proportion of **3** because their definition was identical.

The selectivity of the reaction was determined using the following formula:

# 4. Linear sweep voltammograms

**Figure S2.** LSV curves of BiVO4 photoanode under irradiation (pink), dark (black) and in the absent of DABCO (blue).

The LSV curves are recorded in acetone that contains NiBr2·glyme (0.02 mmol), dtbbpy (0.03 mmol), DABCO (0.4 mmol), LiBr (0.2 M), methyl 4-bromobenzoate (0.2 mmol) and N-methylaniline (0.4 mmol). BiVO4, Ni foam and, Ag/AgNO3 are employed as working electrode, counter electrode and reference electrode, respectively. The scan rate is set to be 100 mV/s.

# 5. Cyclic voltammograms

**Figure S3.** CV curves of blank electrolyte (black), in the presence of DABCO (0.005 M, orange), N-methylaniline (0.005 M, blue), and the mixture of DABCO and N-methylaniline (pink).

The cyclic voltammetry (CV) is carried out with a Shanghai Chenhua CHI760E workstation. A glassy-carbon electrode is used as the working electrode, a Pt plate is employed as the counter electrode and an Ag/AgNO3 electrode is utilized as the reference electrode in acetone. The measurements are carried out at a scan rate of 100 mV s–1. The operation temperature is 298 K. nBu4NPF6 (0.1M) is selected as the electrolyte.

**Figure S4.** CV curves of blank electrolyte (black), methyl 4-bromobenzonate (denoted as Ar-Br, 0.005 M, blue), NiBr2 glyme + dtbbpy (denoted as NiL, 0.005M [Ni] + 0.0075M L, orange), and the mixture of Ar-Br and NiL (pink).

The cyclic voltammetry (CV) is carried out with a Shanghai Chenhua CHI760E workstation. A glassy-carbon electrode is used as the working electrode, a Pt plate is employed as the counter electrode and an Ag/AgNO3 electrode is utilized as the reference electrode in acetone. The measurements are carried out at a scan rate of 100 mV s–1. The operation temperature is 298 K. nBu4NPF6 (0.1M) is selected as the electrolyte.

# 6. Control experiments and radical trapping experiment

**a) H cell experiments:**

In a nitrogen-filled glove box, an oven-dried H cell cathode-chamber equipped with a stir bar was charged with NiBr2·glyme (0.02 mmol, 10 mol%), dtbbpy (0.03 mmol, 15 mol%), DABCO (0.4 mmol, 2 equiv), LiBr (0.2 M), methyl 4-bromobenzoate (0.2 mmol) and acetone (6 mL). The anode-chamber equipped with a stir bar was charged with LiBr (0.2 M) and acetone (6 mL). The mixture was stirred at room temperature for 1 minutes, and N-methylaniline (0.4 mmol, 2 equiv) was sequentially added. The H cell was sealed with the home-made cap equipped with BiVO4 photoanode (1.2 cm × 2.5 cm), nickel foam cathode (1.0 cm × 3.0 cm) and Ag/AgNO3 reference electrode, and then brought out of glove box. After pre-stirring the mixture for 1 minute, photoelectrocatalysis was performed at a constant potential of -0.4 V *vs*. Ag/AgNO3 for 12 h. After the reaction was finished, the yield of product was detected by 1H NMR analysis using benzhydrol as the internal standard.

**b) Radical capture:**

In a nitrogen-filled glove box, an oven-dried photoelectrochemical cell equipped with a stir bar was charged with NiBr2·glyme (0.02 mmol, 10 mol%), dtbbpy (0.03 mmol, 15 mol%), DABCO (0.4 mmol, 2 equiv), LiBr (0.2 M), methyl 4-bromobenzoate (0.2 mmol), BHT (0.4 mmol, 2 equiv) and acetone (5 mL). The mixture was stirred at room temperature for 1 minutes, and N-methylaniline (0.4 mmol, 2 equiv) was sequentially added. The vial was sealed with the home-made cap equipped with BiVO4 photoanode (1.2 cm × 2.5 cm), nickel foam cathode (1.0 cm × 3.0 cm) and Ag/AgNO3 reference electrode, and then brought out of glove box. After pre-stirring the mixture for 1 minute, photoelectrocatalysis was performed at a constant potential of -0.4 V *vs*. Ag/AgNO3 for 12 h. After the reaction was finished, the yield of product was measured by 1H NMR analysis using benzhydrol as the internal standard.

**c) Control experiments:**

In a nitrogen-filled glove box, an oven-dried photoelectrochemical cell equipped with a stir bar was charged with DABCO (0.4 mmol, 2 equiv), LiBr (0.2 M) and acetone (5 mL). The mixture was stirred at room temperature for 1 minutes, and N-methylaniline (0.2 mmol) was sequentially added. The vial was sealed with the home-made cap equipped with BiVO4 photoanode (1.2 cm × 2.5 cm), nickel foam cathode (1.0 cm × 3.0 cm) and Ag/AgNO3 reference electrode, and then brought out of glove box. After pre-stirring the mixture for 1 minute, photoelectrocatalysis was performed at a constant potential of -0.4 V *vs*. Ag/AgNO3 for 6 h. After the reaction was finished, the yield of product was detected by 1H NMR analysis using benzhydrol as the internal standard.

# 7. Computational details

Density functional theory (DFT) calculations were carried out using Gaussian 16 programs[1] throughout this manuscript. Geometric optimizations were performed using M06-L functional[2]. The standard 6-31+G** basis was set[3-5] for H, C, N and O atoms. For the Ni and Br atoms, the SDD basis set and its corresponding effective core potential[6-7] were used. Harmonic vibration frequency calculations were performed for all stationary points to confirm them as a local minima or a transition state. The intrinsic reaction coordinate (IRC) scheme[8-9] was applied for the calculations of the reaction coordinates to confirm whether or not the transition states were directly connected to the reactants and products. Approximate solvent effects were taken into consideration based on the SMD continuum solvation model[10] in all calculations.

**Table S2. Energetics for all species involved (in Hartree)**

| Model | *E* | Thermal Correction | *G* |
| --- | --- | --- | --- |
| Br anion | -13.536815 | -0.016176 | -13.552991 |
| N-Methylaniline **1** | -326.895042 | 0.11406 | -326.780982 |
| methyl-4-bromobenzoate **2** | -472.870695 | 0.094943 | -472.775752 |
| **3** | -785.796635 | 0.224158 | -785.572477 |
| DABCO **6** | -345.307097 | 0.152228 | -345.154869 |
| DABCO cation radical **7** | -345.136868 | 0.153039 | -344.983829 |
| protonated DABCO **8** | -345.777256 | 0.168507 | -345.608749 |
| NMe radical **9** | -326.247377 | 0.099287 | -326.148090 |
| **11** | -994.328203 | 0.325594 | -994.002609 |
| **12** | -1467.232027 | 0.446722 | -1466.785305 |
| **13** | -1453.825425 | 0.450577 | -1453.374848 |
| **14** | -1780.111461 | 0.573748 | -1779.537713 |
| **15** | -1780.723489 | 0.58684 | -1780.136649 |
| **HAT TS** | -672.031324 | 0.28152 | -671.749804 |
| **TS1** | -1467.210624 | 0.447288 | -1466.763336 |
| **TS2** | -1780.087894 | 0.572893 | -1779.515001 |
| **TS2'** | -1780.722231 | 0.590079 | -1780.132152 |
| **TS3** | -1780.094887 | 0.575259 | -1779.519628 |

**Figure S5.** Computed energy profile of hydrogen atom transfer (HAT) process.

**Cartesian coordinate for all species involved (in angstrom)**

1

C -1.87807900 -0.98966900 0.03977500

C -2.30726500 0.34166600 0.03384100

C -1.34914500 1.35342200 -0.01106800

C 0.01256300 1.05622200 -0.04956100

C 0.44730100 -0.28284000 -0.05384600

C -0.52600000 -1.30231600 -0.00362400

H -2.60658900 -1.79620700 0.08016800

H -3.36600000 0.58157100 0.06750900

H -1.65990100 2.39572400 -0.01026600

H 0.73899400 1.86323700 -0.07754400

H -0.20112900 -2.34090000 -0.00056400

N 1.78488200 -0.61497100 -0.14305700

H 2.00611400 -1.55046800 0.16682600

C 2.81516100 0.36806500 0.09761200

H 2.71294100 0.87184700 1.07124200

H 3.78656200 -0.12672900 0.06529700

H 2.80762000 1.13942500 -0.68003600

2

C 0.80290800 1.27277500 0.00000500

C 1.39261500 0.01246000 0.00000100

C 0.64075800 -1.15793900 -0.00001800

C -0.74673600 -1.05853000 -0.00002600

C -1.36890600 0.19574300 -0.00002000

C -0.58456600 1.35459100 -0.00000800

H 1.40712100 2.17346900 0.00001300

H 1.12083500 -2.13053600 -0.00002500

H -1.34502400 -1.96350600 -0.00003700

H -1.07115200 2.32534000 -0.00000300

Br 3.33149800 -0.11698000 0.00000800

C -2.84187000 0.34937600 -0.00003300

O -3.42165700 1.42299400 0.00000000

O -3.47898000 -0.83518900 0.00000000

C -4.91259200 -0.75929300 0.00003800

H -5.26093000 -1.79080300 0.00005000

H -5.26889700 -0.23860800 0.89160300

H -5.26894400 -0.23861200 -0.89151200

3

C 0.32940400 0.69957300 -0.00665200

C -0.00840800 -0.63123700 0.33819100

C -0.72878300 1.59574100 -0.28387700

C -1.32778700 -1.03619000 0.37953500

H 0.77234000 -1.33992300 0.59231100

C -2.04780100 1.17350600 -0.24089400

H -0.51724100 2.62733600 -0.54099100

C -2.37733300 -0.14980300 0.08488400

H -1.56764200 -2.05924800 0.65617200

H -2.83612000 1.88460700 -0.46817700

C -3.75792500 -0.64222900 0.14104500

O -4.08271000 -1.78945100 0.41834300

O -4.66427100 0.31947300 -0.15154800

C -6.03250000 -0.10220000 -0.11527400

H -6.61962600 0.77721400 -0.37736000

H -6.21073300 -0.90311900 -0.83699300

H -6.30433000 -0.45192900 0.88371500

N 1.63867400 1.13777500 -0.02024700

C 2.74335400 0.24729000 -0.03169900

C 1.90648100 2.56446600 -0.13083700

C 3.82686300 0.46974900 0.82736900

C 2.78598500 -0.83428100 -0.92119900

H 2.97746300 2.73632900 -0.03710000

H 1.58658700 2.95566400 -1.10467500

H 1.39152100 3.12613400 0.65528600

C 4.93148700 -0.37803700 0.79678300

H 3.79726400 1.30416400 1.52327400

C 3.88752100 -1.68498700 -0.93649000

H 1.95635500 -1.00021500 -1.60304800

C 4.96639300 -1.46207700 -0.07989700

H 5.76325000 -0.19442500 1.47167700

H 3.90753900 -2.51799900 -1.63427100

H 5.82679600 -2.12489100 -0.09837500

6

C -0.76485900 0.59574500 -1.24804800

C 0.78079200 0.66365800 -1.20329900

H -1.11491400 -0.02109500 -2.08388100

H -1.20743200 1.59203400 -1.36242300

H 1.22976600 0.17438400 -2.07537600

H 1.13593800 1.70056600 -1.18469500

C -0.77647400 -1.37272300 0.10351800

H -1.13546200 -1.78514000 1.05363600

H -1.21889400 -1.96654900 -0.70465900

C 0.76963400 -1.37999600 0.03151200

H 1.20941500 -1.89445200 0.89374700

H 1.12591600 -1.88505900 -0.87381000

C 0.76811100 0.71127100 1.18395500

H 1.11527600 0.17736100 2.07620900

H 1.21559200 1.71177400 1.20059800

C -0.77724700 0.78197600 1.13240800

H -1.22830900 0.38246700 2.04809200

H -1.12721700 1.81388100 1.01254300

N 1.28688700 -0.00282200 0.00680800

N -1.28680400 0.00285600 -0.00684400

7

C -0.81010700 1.32236200 -0.35195700

C 0.79970200 1.34283500 -0.29395200

H -1.14266200 1.56058800 -1.36304900

H -1.20366300 2.04593900 0.36331300

H 1.18904000 1.66151200 -1.26185900

H 1.12853500 2.02015000 0.49524500

C -0.80259000 -0.97125200 -0.97016300

H -1.12888700 -1.96825000 -0.67096100

H -1.19676400 -0.71637900 -1.95476600

C 0.80707800 -0.92082600 -1.01448900

H 1.20278600 -1.91563800 -0.80565200

H 1.13510300 -0.57441600 -1.99536100

C 0.80793000 -0.41340700 1.30566400

H 1.14213300 -1.43416800 1.49535100

H 1.19843500 0.26685300 2.06385200

C -0.80197600 -0.35966300 1.32494600

H -1.19005000 -1.34247600 1.59584300

H -1.13444600 0.39532200 2.03845200

N 1.22529700 0.00448000 -0.00148300

N -1.22526500 -0.00438400 0.00138300

8

C -0.72511600 -1.17817500 0.79857900

C 0.80026200 -1.24132100 0.60489700

H -1.02133300 -1.00743500 1.83539400

H -1.24844700 -2.05564400 0.41620100

H 1.29461800 -1.38171200 1.56918900

H 1.07448400 -2.07902500 -0.04194600

C -0.71104400 1.28114400 0.63524100

H -1.01946000 2.09140100 -0.02795300

H -1.21540300 1.39283000 1.59609800

C 0.81675300 1.14450400 0.75563200

H 1.30424700 2.04978100 0.38562300

H 1.11219600 1.00217500 1.79866400

C 0.78609500 0.08256200 -1.38559200

H 1.07227200 1.05741000 -1.78937300

H 1.26061400 -0.68994300 -1.99562300

C -0.74282700 -0.09029900 -1.41121700

H -1.25871100 0.68686100 -1.97675800

H -1.05869700 -1.06966400 -1.77563000

N 1.29881700 -0.00786200 -0.01387300

N -1.21413200 0.00759200 0.01321400

H -2.23391600 0.01437000 0.02548900

9

C -1.84912200 -0.98865200 0.00003400

C -2.24337900 0.35642600 0.00004900

C -1.27323700 1.36862200 -0.00001700

C 0.07493300 1.05513500 -0.00004200

C 0.50164800 -0.30799700 -0.00003600

C -0.50633200 -1.31819300 -0.00005000

H -2.60027600 -1.77383100 0.00005000

H -3.29863600 0.61510600 0.00012700

H -1.58358100 2.41034200 -0.00005900

H 0.81349900 1.85138000 -0.00012800

H -0.18183800 -2.35591900 -0.00006700

N 1.78392100 -0.72842200 -0.00004000

C 2.80861200 0.28024000 0.00003500

H 2.74689000 0.93613100 0.88134900

H 3.79189200 -0.19566900 -0.00096900

H 2.74586300 0.93793000 -0.87985400

11

Ni -1.86862700 -1.42415800 -0.00254000

Br -4.12282200 -2.08219200 0.00340200

N 0.06212700 -1.64645100 -0.00556300

C 0.74350800 -2.80599400 -0.00729300

C 0.78371500 -0.48929700 -0.00264900

C 2.12875500 -2.87469500 -0.00574400

H 0.13987400 -3.70964700 -0.00976000

C 2.17378900 -0.49623500 -0.00047500

C 2.88928000 -1.69940300 -0.00184400

H 2.59777700 -3.85249900 -0.00724000

H 2.70761000 0.45012200 0.00282300

C -0.03334300 0.73189300 -0.00151300

C 0.48720000 2.02147600 -0.00123700

N -1.37352900 0.50537800 -0.00099500

C -0.35916300 3.13608300 0.00000400

H 1.56399400 2.16229200 -0.00217100

C -2.19143200 1.56689100 0.00009100

C -1.73454000 2.87819300 0.00069600

H -3.25558600 1.34349900 0.00055000

H -2.46197200 3.68268900 0.00167900

C 4.41235500 -1.68586900 0.00235500

C 0.23105100 4.54000300 0.00010000

C 4.90420700 -0.95420900 1.25875100

H 5.99942400 -0.93368100 1.27348000

H 4.55190700 0.08191600 1.29157100

H 4.56351400 -1.45676000 2.17046400

C 4.99483200 -3.09712400 -0.00387900

H 4.69455600 -3.65992400 -0.89433100

H 6.08794200 -3.04144900 -0.00103600

H 4.69056000 -3.66946300 0.87909400

C 4.91246300 -0.93983800 -1.24224800

H 6.00776000 -0.92041300 -1.25002000

H 4.57687500 -1.43116800 -2.16193000

H 4.56176400 0.09707500 -1.26499200

C 1.10647800 4.71485000 1.24844900

H 1.93216600 3.99610400 1.27167200

H 1.54045300 5.72056400 1.26093900

H 0.52124500 4.58820700 2.16567400

C 1.10025700 4.71716700 -1.25230000

H 0.51046700 4.59206400 -2.16681400

H 1.53408000 5.72294800 -1.26519500

H 1.92587200 3.99851100 -1.28085500

C -0.85263200 5.61500800 0.00377200

H -1.49436100 5.55189600 -0.88160900

H -1.49068500 5.54946900 0.89163700

H -0.38579500 6.60494300 0.00410800

12

Ni -0.35997500 -1.06312500 0.01432900

Br -0.88970400 -3.26507100 -0.77604500

N 1.65511300 -1.22426100 -0.18429100

C 2.36785100 -2.35276300 -0.22594500

C 2.30922200 -0.04053700 -0.24968600

C 3.75085500 -2.36446100 -0.34909800

H 1.79509200 -3.27420600 -0.16149200

C 3.69221500 0.01530900 -0.38240600

C 4.45189000 -1.15889900 -0.43912600

H 4.26082400 -3.32081600 -0.37364600

H 4.18704800 0.97999300 -0.43559900

C 1.44918800 1.14345900 -0.12932900

C 1.93089200 2.44740700 -0.13126800

N 0.12486200 0.88464700 0.02659600

C 1.06978600 3.53422000 0.05466200

H 2.99370300 2.61842400 -0.27138000

C -0.70778200 1.91378500 0.22347000

C -0.28083500 3.23385900 0.24707700

H -1.75496900 1.66754100 0.36825700

H -1.01877700 4.01021700 0.41368000

C 5.96495200 -1.07883800 -0.58390300

C 1.62008900 4.95267900 0.05404900

C 6.53953900 -0.31269000 0.61573900

H 7.62912600 -0.24830000 0.52546500

H 6.14976100 0.70884200 0.67329500

H 6.30768200 -0.81862100 1.55900100

C 6.60695100 -2.46244000 -0.64039800

H 6.24276800 -3.04778500 -1.49149900

H 7.69064700 -2.35716000 -0.75018600

H 6.42113700 -3.03688400 0.27329100

C 6.30094300 -0.32082900 -1.87535700

H 7.38768500 -0.24700900 -1.98924800

H 5.90321900 -0.83786700 -2.75520500

H 5.89698100 0.69664000 -1.86810100

C 2.64807300 5.08633100 1.18619400

H 3.48542000 4.39215700 1.06173100

H 3.05589900 6.10266100 1.19637100

H 2.19079600 4.89531900 2.16283300

C 2.31064300 5.21775100 -1.29054800

H 1.60691400 5.12475400 -2.12463100

H 2.71707200 6.23456700 -1.30300000

H 3.14006000 4.52538400 -1.46685900

C 0.51996200 5.99059700 0.25923200

H -0.23541300 5.94739700 -0.53272300

H 0.01291500 5.86444200 1.22175900

H 0.95774900 6.99338000 0.24513800

C -2.24707900 -0.73081900 -0.14163200

C -2.62466300 -0.20620200 -1.38116500

C -3.18823700 -0.89603900 0.87129900

C -3.93923200 0.19906100 -1.58872400

H -1.89943100 -0.09495500 -2.18552400

C -4.50498000 -0.48989400 0.65847600

H -2.89701700 -1.32306300 1.82620200

C -4.89078300 0.06458600 -0.56921900

H -4.23994100 0.61991400 -2.54461000

H -5.23595200 -0.60764400 1.45303400

C -6.27293000 0.51219300 -0.83915400

O -6.65033900 1.00270300 -1.89230200

O -7.09089000 0.32157000 0.21515800

C -8.44992600 0.73501000 0.01719400

H -8.96384600 0.51363200 0.95152900

H -8.49958000 1.80503600 -0.19744000

H -8.90549300 0.17948300 -0.80580800

Br -0.17865100 -1.27509600 2.52526100

13

Ni 0.37095500 -1.15122600 0.06457600

Br 0.88010700 -3.46858700 0.08492100

N -1.61924400 -1.36124900 0.01227000

C -2.33910800 -2.49068400 -0.01063100

C -2.29358700 -0.18302800 -0.00941800

C -3.72658500 -2.50702700 -0.05789700

H -1.76348900 -3.41203500 0.00903800

C -3.68238500 -0.13118000 -0.05483400

C -4.44126800 -1.30628200 -0.08266900

H -4.23086200 -3.46678400 -0.07506700

H -4.17940600 0.83409700 -0.06977300

C -1.42993300 0.99833000 0.01907400

C -1.90985400 2.30203500 0.01076600

N -0.09290500 0.72515200 0.05767600

C -1.03949800 3.39557300 0.04759800

H -2.98222800 2.46625200 -0.02254300

C 0.74873300 1.77395300 0.09055100

C 0.32391100 3.09420500 0.08800300

H 1.80698300 1.54005000 0.12098600

H 1.07813100 3.87284100 0.11882100

C -5.96068800 -1.23508600 -0.14395800

C -1.59001800 4.81374200 0.04459000

C -6.37106800 -0.49884700 -1.42680300

H -7.46296500 -0.43396000 -1.48441900

H -5.97469900 0.52126300 -1.45571200

H -6.01621600 -1.02602600 -2.31891500

C -6.59674000 -2.62292500 -0.14631900

H -6.35035200 -3.18727600 0.75947400

H -7.68591400 -2.52499400 -0.18911100

H -6.28386800 -3.21530000 -1.01278300

C -6.47810800 -0.45485800 1.07209600

H -7.57148400 -0.39961000 1.03852200

H -6.19332900 -0.94410900 2.00973800

H -6.09492400 0.57045100 1.09375800

C -2.41444200 5.02612500 -1.23244100

H -3.25774800 4.33059800 -1.29377700

H -2.82037100 6.04330700 -1.24685500

H -1.79977100 4.89474800 -2.12940200

C -2.49896900 4.99803000 1.26761400

H -1.94680000 4.84350800 2.20081700

H -2.90337400 6.01586100 1.27885600

H -3.34559200 4.30387000 1.25538100

C -0.47624200 5.85609600 0.09442000

H 0.13037600 5.76223900 1.00151300

H 0.19134000 5.78279000 -0.77076400

H -0.91375800 6.85918800 0.09099000

C 2.21883400 -0.83117800 0.09654400

C 2.91292200 -0.68103900 1.30897300

C 2.93809000 -0.65690200 -1.09754500

C 4.26302200 -0.34800300 1.32831900

H 2.39267400 -0.82103900 2.25551300

C 4.28968900 -0.32442800 -1.08702300

H 2.43660100 -0.77683400 -2.05700000

C 4.96881900 -0.16169000 0.13043400

H 4.79054100 -0.22717600 2.27168900

H 4.82359800 -0.18890100 -2.02366500

C 6.39630200 0.19463200 0.20407200

O 7.02706700 0.34696900 1.24065000

O 6.95763600 0.34224200 -1.01655700

C 8.34829900 0.68690300 -1.01066100

H 8.63638700 0.76869600 -2.05798500

H 8.50929300 1.63937200 -0.49986400

H 8.93739000 -0.09003500 -0.51733700

14

Ni -0.36159700 -0.63617100 0.47766900

N 1.63561800 -1.05914700 0.27299800

C 2.19629100 -2.25097900 0.47604200

C 2.42436800 -0.00537400 -0.02997500

C 3.56680700 -2.45906900 0.38327100

H 1.50282200 -3.05296900 0.72268600

C 3.80404100 -0.14468900 -0.13853200

C 4.41106600 -1.38978600 0.06779500

H 3.95624100 -3.45532900 0.56028400

H 4.41393700 0.72112200 -0.37799300

C 1.70214800 1.26478900 -0.20037200

C 2.32413700 2.46670600 -0.51828500

N 0.36030000 1.19623200 -0.00254600

C 1.58686300 3.65082300 -0.62962900

H 3.39777900 2.48234100 -0.67955300

C -0.35401500 2.32315500 -0.09733300

C 0.21174500 3.55406400 -0.40193800

H -1.42171600 2.23064400 0.08159900

H -0.43706400 4.42089100 -0.45764700

C 5.92313000 -1.52655300 -0.05294900

C 2.29052700 4.95485600 -0.97676000

C 6.59317000 -0.58562400 0.95770000

H 7.68205500 -0.67550900 0.88137700

H 6.33293100 0.46215900 0.77608100

H 6.30462800 -0.83404000 1.98462500

C 6.39146600 -2.95404300 0.21818700

H 5.96190100 -3.66804600 -0.49257100

H 7.48032300 -3.00507800 0.12072700

H 6.13395300 -3.28356200 1.23045300

C 6.34682700 -1.12634800 -1.47277900

H 7.43389700 -1.21393100 -1.57390100

H 5.88415100 -1.77552800 -2.22394000

H 6.07316700 -0.09167800 -1.70344000

C 3.34423200 5.25159800 0.09896500

H 4.09526800 4.45762400 0.16331600

H 3.86512100 6.18480200 -0.14041400

H 2.88400500 5.36452200 1.08635100

C 2.98681700 4.79790200 -2.33551100

H 2.26518300 4.57850400 -3.12972300

H 3.50367600 5.72769700 -2.59592200

H 3.73168900 3.99571300 -2.32195600

C 1.31600500 6.12698300 -1.05268400

H 0.55384000 5.97574400 -1.82459100

H 0.80615000 6.29774900 -0.09857700

H 1.86363000 7.04072500 -1.30329900

C -2.22708000 -0.20041300 0.29062100

C -2.68999500 -0.03669400 -1.02067900

C -3.10490600 0.01889800 1.35529200

C -4.00074500 0.36385400 -1.26402600

H -2.02704800 -0.21432800 -1.86762500

C -4.41817100 0.41900800 1.11567100

H -2.75932400 -0.11124900 2.37834700

C -4.87744000 0.59800000 -0.19674600

H -4.35791000 0.49805600 -2.28191600

H -5.09017800 0.59337200 1.95107000

C -6.25776800 1.02412100 -0.50452300

O -6.69738300 1.19774900 -1.63119400

O -7.00056100 1.20709100 0.60637600

C -8.35362200 1.62165000 0.37551300

H -8.80433400 1.71893900 1.36226300

H -8.37939500 2.58033500 -0.14781700

H -8.89058900 0.87439700 -0.21337200

Br 0.01009300 -0.16683800 2.98798500

N -0.91916300 -2.49420900 0.47769600

C -1.13179400 -3.06083900 -0.75961800

C -1.76034100 -2.96915700 1.55454100

C -1.94726200 -4.20447800 -0.95689900

C -0.47817800 -2.53599600 -1.90607600

H -1.50922100 -4.01079200 1.80249500

H -1.57478900 -2.36308500 2.44445900

H -2.83767800 -2.93734700 1.32259100

C -2.06286200 -4.79485300 -2.21255000

H -2.47516400 -4.64358200 -0.11667000

C -0.61486800 -3.12624800 -3.15376300

H 0.13528400 -1.63998300 -1.80915000

C -1.40436800 -4.26858900 -3.32405500

H -2.68780700 -5.67877400 -2.32115000

H -0.10081200 -2.68732300 -4.00585900

H -1.50823200 -4.72998900 -4.30180400

15

Ni -0.30868700 -0.70939400 0.16193000

N 1.65379400 -1.17409200 0.05903500

C 2.27564600 -2.33783400 0.28500500

C 2.43873200 -0.09329100 -0.18588900

C 3.65362900 -2.49640600 0.27404300

H 1.65757200 -3.20682600 0.49503600

C 3.82716500 -0.18122700 -0.21072300

C 4.47688400 -1.39679200 0.01995400

H 4.06091200 -3.48206100 0.46905000

H 4.41359100 0.71097900 -0.40522800

C 1.70536500 1.15633500 -0.38697200

C 2.32402900 2.37463300 -0.64445300

N 0.34975000 1.04932400 -0.28501100

C 1.58141700 3.54859900 -0.79688300

H 3.40593000 2.41230500 -0.72286200

C -0.36938100 2.17614900 -0.43019600

C 0.19607800 3.41755900 -0.67961300

H -1.44455200 2.07644100 -0.34092400

H -0.46776200 4.26914500 -0.77939300

C 5.99671300 -1.47335200 -0.00945800

C 2.28482800 4.86853600 -1.07607900

C 6.56637900 -0.52667000 1.05584900

H 7.66066200 -0.57397800 1.04674400

H 6.27732200 0.51364400 0.87469500

H 6.22400800 -0.80397800 2.05857400

C 6.50044700 -2.88766100 0.26712700

H 6.13882200 -3.60378500 -0.47866100

H 7.59429700 -2.89897200 0.23349200

H 6.19626700 -3.24379300 1.25720400

C 6.49133300 -1.03151300 -1.39335400

H 7.58513700 -1.07730000 -1.42880300

H 6.10027000 -1.68272300 -2.18256300

H 6.19399100 -0.00333000 -1.62335400

C 3.27885800 5.15645600 0.05730600

H 4.04181200 4.37555900 0.13919400

H 3.79299000 6.10487400 -0.13212300

H 2.76896100 5.23495000 1.02343000

C 3.05135400 4.74937300 -2.40042500

H 2.37284900 4.54570800 -3.23585700

H 3.57687800 5.68684000 -2.61219200

H 3.79735100 3.94855200 -2.36652500

C 1.29920000 6.02968200 -1.17606400

H 0.58115300 5.88827200 -1.99089400

H 0.73687300 6.16922700 -0.24659000

H 1.84573400 6.95688500 -1.37460900

C -2.10935000 -0.16237900 0.10448200

C -2.83173400 -0.17696000 -1.10001100

C -2.75595400 0.31127200 1.25803800

C -4.15033800 0.26541100 -1.15290000

H -2.36318700 -0.53917500 -2.01550300

C -4.07558800 0.75343900 1.21343800

H -2.20600700 0.33112200 2.20034200

C -4.78793000 0.73588400 0.00371200

H -4.70328000 0.25187500 -2.08940000

H -4.55871600 1.11595700 2.11683900

C -6.18483200 1.19646500 -0.10394100

O -6.84085900 1.20359500 -1.13568800

O -6.68244700 1.62111000 1.07776000

C -8.03785800 2.08470200 1.03825100

H -8.27766300 2.38215400 2.05828600

H -8.13481100 2.93870200 0.36353700

H -8.70972200 1.28811200 0.70985800

Br 0.45852900 -0.29428600 3.17520400

N -0.94179900 -2.60825100 0.40735300

C -1.49211600 -3.12129900 -0.82747600

C -1.74710700 -2.84573400 1.61974900

C -2.83130700 -3.49083100 -0.94607900

C -0.64672500 -3.20096100 -1.93964700

H -1.92627600 -3.91720500 1.76166100

H -1.19474800 -2.42849800 2.46552600

H -2.70205700 -2.32695800 1.54268600

C -3.32092500 -3.92617800 -2.17910000

H -3.50086200 -3.43044500 -0.09429100

C -1.14041500 -3.64429200 -3.16130600

H 0.39498400 -2.90083600 -1.84402100

C -2.48412200 -4.00447700 -3.28880500

H -4.36806700 -4.20396100 -2.26418100

H -0.47413100 -3.70217000 -4.01765800

H -2.87164500 -4.34397000 -4.24504900

H -0.06017700 -3.09462700 0.55663900

TS_HAT

C -2.25973000 1.37481800 0.04695600

C -3.71159100 0.85550700 -0.00526300

H -2.03508300 1.88489200 0.98920100

H -2.03531500 2.06047500 -0.77564400

H -4.30494400 1.27580000 0.81258500

H -4.19496800 1.13323600 -0.94742200

C -1.49284400 -0.64189300 1.13868400

H -0.86893800 -1.52829400 0.98472500

H -1.10035300 -0.09466500 2.00175200

C -2.98323500 -1.00617800 1.29563300

H -3.10646500 -2.08294500 1.44722000

H -3.42606800 -0.49374700 2.15563600

C -3.07800800 -1.17658600 -1.08453700

H -3.01745700 -2.26091300 -0.94658800

H -3.70502400 -0.98441100 -1.96060900

C -1.67420200 -0.56212400 -1.27029900

H -0.90292500 -1.32668900 -1.40896800

H -1.63030400 0.12428400 -2.12162500

N -3.73765900 -0.60920200 0.09920800

N -1.33030600 0.22082700 -0.05847700

C 3.15510400 -1.86758300 -0.07397200

C 4.43987600 -1.32024100 0.05542400

C 4.61044000 0.07151200 0.12956200

C 3.52064100 0.91594800 0.07672400

C 2.20694500 0.37536300 -0.05535300

C 2.05141400 -1.04208900 -0.12944700

H 3.02720800 -2.94388700 -0.13296500

H 5.30595400 -1.97422600 0.09725900

H 5.60840000 0.48724800 0.23030200

H 3.65785600 1.99053400 0.13695300

H 1.05442700 -1.46018500 -0.23566000

N 1.10678700 1.14461100 -0.11695400

H -0.02735300 0.66332900 -0.12296400

C 1.18494300 2.58115800 -0.05179000

H 1.81253000 2.98041600 -0.85653400

H 0.18240100 2.99718400 -0.14755800

H 1.61613700 2.91324400 0.90052800

TS1

Ni 0.75771100 -1.74834700 0.62611900

N -0.39900300 -0.16616600 1.18983100

N 2.02210700 -0.20055100 0.20230100

C -1.65277400 -0.25150200 1.64058700

C -2.48712100 0.85302800 1.75981600

C -2.01476900 2.11859200 1.39950100

C 3.54454100 2.10646700 -0.33802300

C 4.07466700 0.82316100 -0.49915800

C 3.28772800 -0.28723600 -0.22231900

C 0.09417900 1.04957400 0.86010200

C -0.68801300 2.19653200 0.95704300

C 2.22092100 2.18595800 0.11089300

C 1.48697300 1.03502000 0.37646600

H -1.99166400 -1.25292700 1.89995500

H -3.49894100 0.70530800 2.12110000

H 5.09288100 0.66737100 -0.83770100

H 3.67926700 -1.29342600 -0.34933200

C -0.14001800 -1.94936100 -1.19481300

C -1.38617900 -2.52695900 -0.88193700

C -0.05919100 -0.82205400 -2.03651300

C -2.54123400 -1.82830500 -1.20105200

H -1.43239800 -3.45696000 -0.32451200

C -1.22452700 -0.15106000 -2.35645300

H 0.90576000 -0.44119400 -2.35630200

C -2.47728600 -0.61898400 -1.91507800

H -3.50338000 -2.22226000 -0.88724500

H -1.17988600 0.76605200 -2.93836900

H -0.27166400 3.15668500 0.66654700

H 1.76044800 3.15754700 0.26262400

Br 1.51552500 -3.31108700 -1.30194300

Br 0.33469800 -3.36525200 2.41176000

C -2.87534200 3.37395200 1.44637100

C 4.33161400 3.37913300 -0.61872600

C 4.39922100 4.21775700 0.66501100

H 4.96347100 5.13743600 0.47683900

H 3.40350100 4.50522100 1.01775600

H 4.90098600 3.67212300 1.47130800

C 5.75292700 3.07942500 -1.08794800

H 5.76362600 2.50130200 -2.01807900

H 6.28035100 4.01949900 -1.27711700

H 6.32404600 2.52540200 -0.33529100

C 3.60782800 4.18251000 -1.70795300

H 4.16068500 5.10438900 -1.91789700

H 3.53469100 3.61263500 -2.64048100

H 2.59511500 4.46434800 -1.40199400

C -4.28640400 3.08121800 1.95039600

H -4.28261500 2.67922800 2.96923000

H -4.86954900 4.00727400 1.96179800

H -4.81101300 2.36779600 1.30481600

C -2.21944100 4.40501000 2.37413400

H -2.12981200 4.02054100 3.39581500

H -1.21951700 4.68734900 2.02903200

H -2.82824500 5.31491900 2.40767500

C -2.96877900 3.95340200 0.02805100

H -1.98451000 4.22672200 -0.36607800

H -3.42195500 3.23471300 -0.66381800

H -3.58908900 4.85619700 0.03339700

C -3.66926000 0.17941000 -2.23082800

O -3.68356100 1.14912000 -2.97730200

O -4.77307600 -0.26592600 -1.58872100

C -5.97481700 0.46434000 -1.86486500

H -6.75587600 -0.02159400 -1.28153000

H -5.87242700 1.50910300 -1.56056200

H -6.21729500 0.42209600 -2.92946400

TS2

Ni 0.20170900 -1.30143900 -0.58695900

Br 0.59850100 -3.62092600 -0.26090800

N -1.79429100 -1.40895500 -0.60057900

C -2.57187800 -2.49591900 -0.52967000

C -2.40161500 -0.19611200 -0.62890400

C -3.95810400 -2.43535900 -0.46689800

H -2.04508300 -3.44645000 -0.50785800

C -3.78369100 -0.06596400 -0.56282000

C -4.60411500 -1.19629400 -0.47044600

H -4.51377800 -3.36468400 -0.40852500

H -4.22848700 0.92431800 -0.58227000

C -1.47599800 0.93330600 -0.73749800

C -1.87971500 2.26211700 -0.76848200

N -0.15914800 0.58486800 -0.80886800

C -0.94908700 3.29990100 -0.89038700

H -2.93705800 2.49273800 -0.68191100

C 0.73742800 1.57603300 -0.94899200

C 0.38918300 2.91785200 -1.00021100

H 1.77842900 1.27880200 -1.01157700

H 1.18409700 3.64775300 -1.10763800

C 2.06254100 -1.06826400 -0.59488300

C 2.75179600 -0.77351500 0.59208800

C 2.79444900 -1.08321000 -1.79368100

C 4.10797900 -0.46785800 0.58222300

H 2.21939800 -0.77148900 1.54243500

C 4.15391500 -0.78296400 -1.81258200

H 2.29799000 -1.32259200 -2.73314400

C 4.82684800 -0.46399600 -0.62263300

H 4.62788400 -0.22715600 1.50733500

H 4.69907700 -0.79200900 -2.75251200

C 1.31112700 2.45605500 2.81185300

C 2.24100000 1.88776600 3.69389000

C 2.05145300 0.57856900 4.15663600

C 0.96201800 -0.17017100 3.74079600

C 0.00701500 0.38355800 2.83578900

C 0.21298500 1.72484300 2.39834900

H 1.45142300 3.47290400 2.45107800

H 3.10588300 2.45959400 4.01909500

H 2.77358700 0.14147000 4.84194500

H 0.84105100 -1.18906800 4.09760100

H -0.52471100 2.14975800 1.72046900

N -1.07664000 -0.25300500 2.33901600

C -1.28992800 -1.61481000 2.75067200

H -1.33485500 -1.72264000 3.84513100

H -2.23369600 -1.97833200 2.33345500

H -0.48839900 -2.28264000 2.39554700

C 6.26029300 -0.12642100 -0.58548500

O 6.88650200 0.15709000 0.42594200

O 6.83246800 -0.15931000 -1.80957100

C 8.22886200 0.15994500 -1.83937100

H 8.52640400 0.08507500 -2.88455600

H 8.40234400 1.17360500 -1.47000500

H 8.80070600 -0.54687200 -1.23329700

C -1.40977100 4.74914700 -0.86094200

C -2.44395700 4.98012000 -1.96984400

C -2.05833600 5.01930900 0.50469300

C -0.24792400 5.71988500 -1.05498100

H -3.32119800 4.33597400 -1.85202800

H -2.78944700 6.01909600 -1.94501300

H -2.01443400 4.79044700 -2.95938500

H -1.34241600 4.86534800 1.32029800

H -2.40766400 6.05636700 0.55304200

H -2.91963600 4.36665200 0.68220500

H 0.50058900 5.62451600 -0.26059100

H 0.25458900 5.56875300 -2.01640900

H -0.62240100 6.74799200 -1.03366500

C -6.11502600 -1.03707600 -0.37408300

C -6.62174300 -0.27804400 -1.60767900

C -6.82734700 -2.38509900 -0.29684800

C -6.44571200 -0.22760500 0.88760100

H -7.70844100 -0.15504400 -1.54691400

H -6.17871000 0.72018100 -1.68413800

H -6.39455000 -0.82197700 -2.53087100

H -6.52332800 -2.95857800 0.58533500

H -7.90777500 -2.22389800 -0.22975400

H -6.63854600 -2.99857900 -1.18432500

H -7.53022100 -0.10093500 0.97480100

H -6.09060100 -0.73620800 1.79050500

H -5.99427300 0.76957300 0.86119300

TS2’

Ni 0.32498300 -0.71317600 -0.61641900

Br 0.39717500 -2.17115200 -2.83394400

N -1.62173300 -1.09651400 -0.50578900

C -2.22196400 -2.29243200 -0.58296100

C -2.39248700 -0.01109200 -0.24440000

C -3.57888000 -2.47464000 -0.36065800

H -1.58080500 -3.12809900 -0.85575200

C -3.76104900 -0.12719300 -0.01314000

C -4.38982500 -1.37460800 -0.05519800

H -3.98555000 -3.47704500 -0.43493700

H -4.34122300 0.76521200 0.20201100

C -1.65952300 1.25178300 -0.27388100

C -2.26470900 2.49638300 -0.13771000

N -0.31728400 1.12132300 -0.50450300

C -1.52749700 3.67767600 -0.25310200

H -3.33369800 2.54085800 0.04906300

C 0.39135500 2.25957800 -0.63915100

C -0.16358200 3.52432000 -0.52383700

H 1.44857000 2.14203800 -0.84802100

H 0.48991000 4.38057500 -0.65083200

C 2.14517100 -0.23071900 -0.50497800

C 2.57185900 0.37588500 0.69157200

C 3.11825100 -0.47535500 -1.48850800

C 3.90738500 0.69045500 0.91534400

H 1.84545000 0.60612700 1.47136300

C 4.45700700 -0.14971100 -1.27929200

H 2.82276100 -0.94366900 -2.42446800

C 4.87036000 0.42842200 -0.06978500

H 4.22064800 1.14334400 1.85359600

H 5.18973200 -0.35112100 -2.05623400

C -0.37905000 -0.97613700 3.94749500

C 0.80686800 -0.94468600 4.68640800

C 1.97383800 -1.44792300 4.11753500

C 1.97067300 -1.96984900 2.82321100

C 0.78842000 -1.97997300 2.07618500

C -0.39075900 -1.48715900 2.65514400

H -1.30275800 -0.60021500 4.37975400

H 0.81552100 -0.54039000 5.69450400

H 2.90324100 -1.43950500 4.68129900

H 2.89338000 -2.35199400 2.39898100

H -1.31617600 -1.50718700 2.08381700

N 0.75329800 -2.42809200 0.72142700

C 1.86310700 -3.28238300 0.28842400

H 1.97504800 -4.16006200 0.93699200

H 1.66430600 -3.59308900 -0.73886200

H 2.79618400 -2.71538300 0.29429500

C 6.27494800 0.77833600 0.20862700

O 6.67792500 1.27880100 1.24907400

O 7.09628200 0.48480100 -0.82310600

C 8.47771300 0.80210600 -0.61307300

H 8.99005700 0.51033500 -1.52902900

H 8.60597000 1.87228700 -0.43365500

H 8.87802100 0.24421000 0.23693200

C -2.21068600 5.02895900 -0.09711700

C -3.33300900 5.14985100 -1.13704600

C -2.81767000 5.11837900 1.30978600

C -1.23415300 6.18646800 -0.28945000

H -4.09263300 4.37159900 -1.01025700

H -3.83157600 6.11990900 -1.03512700

H -2.94004400 5.07726300 -2.15687000

H -2.04538200 5.03625100 2.08220800

H -3.32293400 6.08188700 1.43803900

H -3.55631300 4.32884800 1.48388200

H -0.42181200 6.16243400 0.44487700

H -0.78871100 6.18282900 -1.29010400

H -1.76355400 7.13644600 -0.16624400

C -5.88642300 -1.48436800 0.20539000

C -6.63669400 -0.66019500 -0.85018600

C -6.37319400 -2.92983100 0.13961300

C -6.19558400 -0.91990700 1.59843900

H -7.71603500 -0.72661500 -0.67554600

H -6.35778100 0.39799000 -0.81456400

H -6.43430800 -1.03025300 -1.86102600

H -5.87703500 -3.56262100 0.88340900

H -7.44839300 -2.96250900 0.34125900

H -6.20899100 -3.37262500 -0.84852300

H -7.27052800 -0.98865000 1.79716600

H -5.67118100 -1.47987100 2.38035400

H -5.90856000 0.13305500 1.68480700

H -0.11838700 -2.93180400 0.57535000

TS3

Ni -0.32744100 -0.70052400 0.52262800

N 1.71666000 -1.04311300 0.25991400

C 2.36919500 -2.19432100 0.42910900

C 2.42879900 0.06923100 -0.02750900

C 3.74950600 -2.30647800 0.31147300

H 1.75323800 -3.05945300 0.66938400

C 3.81378400 0.03001400 -0.15608200

C 4.51047500 -1.17346600 0.00762400

H 4.21013900 -3.27712500 0.45833500

H 4.36086000 0.94041500 -0.38140800

C 1.62464700 1.29825600 -0.17181600

C 2.16537200 2.54459500 -0.47055100

N 0.29230900 1.14256000 0.02484500

C 1.34877000 3.67745000 -0.56693900

H 3.23524100 2.63892900 -0.62952000

C -0.49925700 2.21597800 -0.06262400

C -0.01912400 3.48654600 -0.35111300

H -1.55949800 2.04160500 0.11069800

H -0.72328000 4.30935900 -0.40223300

C 6.02552900 -1.19911500 -0.14585400

C 1.96425000 5.03136200 -0.89294900

C 6.64867900 -0.25628900 0.89253300

H 7.73935300 -0.26279200 0.79213500

H 6.30885500 0.77627000 0.76244800

H 6.40121300 -0.56872200 1.91271300

C 6.59662900 -2.60046400 0.05403100

H 6.19717500 -3.31273100 -0.67590200

H 7.68355900 -2.57305800 -0.07080100

H 6.38814500 -2.98770300 1.05707000

C 6.39096900 -0.71082500 -1.55435900

H 7.47909500 -0.71783300 -1.67920200

H 5.95850100 -1.35870700 -2.32447200

H 6.04186000 0.31098800 -1.73556900

C 3.01465300 5.37206600 0.17283600

H 3.81821100 4.62922700 0.20569900

H 3.46844300 6.34331300 -0.05152500

H 2.56559100 5.43092400 1.17004900

C 2.64757500 4.94886500 -2.26500600

H 1.92913200 4.70009900 -3.05346700

H 3.09982400 5.91521900 -2.51258300

H 3.44239400 4.19588800 -2.27967500

C 0.91735600 6.14156900 -0.92728500

H 0.15591700 5.96305100 -1.69398400

H 0.41039400 6.25516000 0.03686300

H 1.40350800 7.09412400 -1.15974500

C -2.25115800 -0.71505600 0.23994800

C -2.63161500 -0.40812000 -1.08786900

C -3.16878100 -0.44904800 1.28033000

C -3.84611200 0.20391900 -1.34665100

H -1.96007100 -0.61683500 -1.91626600

C -4.38333400 0.15807900 1.00650800

H -2.90002600 -0.66620600 2.30895500

C -4.74771100 0.49891800 -0.30979700

H -4.11394800 0.46488000 -2.36754600

H -5.05867000 0.38376200 1.82696100

C -6.01941300 1.14455000 -0.64424000

O -6.36926600 1.46973600 -1.77256700

O -6.79803300 1.35491500 0.44491700

C -8.05547800 1.98591100 0.18125200

H -8.54871400 2.07826200 1.14829600

H -7.90926600 2.97433000 -0.26159700

H -8.66211100 1.37687200 -0.49367500

Br -0.09013400 -0.23781200 3.03209200

N -1.30528400 -2.37472000 0.43912900

C -1.24143500 -3.13393500 -0.72992800

C -1.83586500 -3.03069400 1.61903400

C -1.88884900 -4.38116800 -0.85334000

C -0.49927100 -2.66820000 -1.83532100

H -1.31078500 -3.98005900 1.77686500

H -1.65422900 -2.40229000 2.49185900

H -2.91386500 -3.23637200 1.54236200

C -1.77696800 -5.12492900 -2.02546600

H -2.47442300 -4.77538500 -0.02942600

C -0.39837400 -3.41638400 -3.00155600

H 0.01368900 -1.70896200 -1.77201200

C -1.03505800 -4.65487500 -3.10882900

H -2.28262800 -6.08553800 -2.08887400

H 0.18737200 -3.02868300 -3.83133100

H -0.95490200 -5.24009700 -4.02025900

# 8. References

[1] Gaussian 16, Revision C.01, Frisch, M. J.; Trucks, G. W.; Schlegel, H. B.; Scuseria, G. E.; Robb, M. A.; Cheeseman, J. R.; Scalmani, G.; Barone, V.; Petersson, G. A.; Nakatsuji, H.; Li, X.; Caricato, M.; Marenich, A. V.; Bloino, J.; Janesko, B. G.; Gomperts, R.; Mennucci, B.; Hratchian, H. P.; Ortiz, J. V.; Izmaylov, A. F.; Sonnenberg, J. L.; Williams-Young, D.; Ding, F.; Lipparini, F.; Egidi, F.; Goings, J.; Peng, B.; Petrone, A.; Henderson, T.; Ranasinghe, D.; Zakrzewski, V. G.; Gao, J.; Rega, N.; Zheng, G.; Liang, W.; Hada, M.; Ehara, M.; Toyota, K.; Fukuda, R.; Hasegawa, J.; Ishida, M.; Nakajima, T.; Honda, Y.; Kitao, O.; Nakai, H.; Vreven, T.; Throssell, K.; Montgomery, J. A., Jr.; Peralta, J. E.; Ogliaro, F.; Bearpark, M. J.; Heyd, J. J.; Brothers, E. N.; Kudin, K. N.; Staroverov, V. N.; Keith, T. A.; Kobayashi, R.; Normand, J.; Raghavachari, K.; Rendell, A. P.; Burant, J. C.; Iyengar, S. S.; Tomasi, J.; Cossi, M.; Millam, J. M.; Klene, M.; Adamo, C.; Cammi, R.; Ochterski, J. W.; Martin, R. L.; Morokuma, K.; Farkas, O.; Foresman, J. B.; Fox, D. J. Gaussian, Inc., Wallingford CT, 2016.

[2] Y. Zhao, and D. G. Truhlar, *J. Chem. Phys.*, 125 (2006) 194101.

[3] W. J. Hehre, R. Ditchfield and J.A. Pople, *J. Chem. Phys.*, 56 (1972) 2257.

[4] M. M. Francl, W. J. Pietro, W. J. Hehre, J. S. Binkley, M. S. Gordon, D. J. DeFrees and J. A. Pople, *J. Chem. Phys.*, 77 (1982) 3654.

[5] T. Clark, J. Chandrasekhar and P. v. R. Schleyer, *J. Comp. Chem.*, 4 (1983) 294.

[6] M. Dolg, U. Wedig, H. Stoll, and H. Preuss, *J. Chem. Phys.*, 86 (1987) 866.

[7] A. Bergner, M. Dolg, W. Kuechle, H. Stoll, and H. Preuss, *Mol. Phys.*, 80 (1993) 1431.

[8] K. Fukui, *J. Phys. Chem.*, 74 (1970) 4161.

[9] K. Fukui, *Acc. Chem. Res.*, 14 (1981) 363.

[10] A. V. Marenich, C. J. Cramer, and D. G. Truhlar, *J. Phys. Chem. B*, 113 (2009) 6378.

# 9. Characterization data for all products

**methyl 4-(methyl(phenyl)amino)benzoate (3):**

The compound was prepared according to the general procedure. Yield: 37.6 mg, 78%. 1H NMR (400 MHz, Chloroform-d) δ 7.94 – 7.83 (m, 2H), 7.47 – 7.37 (m, 2H), 7.28 – 7.19 (m, 3H), 6.84 – 6.75 (m, 2H), 3.88 (s, 3H), 3.39 (s, 3H). 13C NMR (101 MHz, Chloroform-d) δ 167.22, 152.54, 147.52, 131.00, 129.80, 125.89, 125.34, 119.16, 113.79, 51.61, 40.22. HRMS (ESI): Calculated for C15H16NO2 [M+H]+: 242.1176; found: 242.1177.

**1-(4-(methyl(phenyl)amino)phenyl)ethan-1-one (16):**

The compound was prepared according to the general procedure. Yield: 34.6 mg, 77%. 1H NMR (400 MHz, Chloroform-d) δ 7.87 – 7.77 (m, 2H), 7.41 (t, J = 7.8 Hz, 2H), 7.27 – 7.17 (m, 3H), 6.75 (d, J = 8.9 Hz, 2H), 3.37 (s, 3H), 2.50 (s, 3H). 13C NMR (101 MHz, Chloroform-d) δ 196.45, 152.69, 147.28, 130.20, 129.88, 127.16, 126.14, 125.67, 113.46, 40.24, 26.11. HRMS (ESI): Calculated for C15H16NO [M+H]+: 226.1226; found: 226.1222.

**N-methyl-N-phenyl-[1,1'-biphenyl]-4-amine (17):**

The compound was prepared according to the general procedure. Yield: 34.7 mg, 67%. 1H NMR (400 MHz, Chloroform-d) δ 7.64 – 7.57 (m, 2H), 7.57 – 7.51 (m, 2H), 7.49 – 7.40 (m, 2H), 7.39 – 7.28 (m, 3H), 7.14 (d, J = 7.3 Hz, 2H), 7.10 (d, J = 8.4 Hz, 2H), 7.05 (t, J = 7.3 Hz, 1H), 3.40 (s, 3H). 13C NMR (101 MHz, Chloroform-d) δ 148.80, 148.35, 140.89, 133.44, 129.31, 128.72, 127.77, 126.59, 126.57, 121.98, 121.49, 119.64, 40.28. HRMS (ESI): Calculated for C19H18N [M+H]+: 260.1434; found: 260.1428.

**N-methyl-N-phenyl-4-(trifluoromethyl)aniline (18):**

The compound was prepared according to the general procedure. Yield: 36.1 mg, 72%. 1H NMR (400 MHz, Chloroform-d) δ 7.48 – 7.36 (m, 4H), 7.25 – 7.17 (m, 3H), 6.87 (d, J = 8.6 Hz, 2H), 3.37 (s, 3H). 13C NMR (101 MHz, Chloroform-d) δ 151.49, 147.74, 129.78, 126.20 (q, *JC-F* = 3.8 Hz), 125.28, 124.93, 119.91 (d, *JC-F* = 32.6 Hz), 114.81, 40.20. 19F NMR (377 MHz, Chloroform-d) δ -61.23. HRMS (ESI): Calculated for C14H13F3N [M+H]+: 252.0995; found: 252.0991.

**4-chloro-N-methyl-N-phenylaniline (19):**

The compound was prepared according to the general procedure. Yield: 29.5 mg, 68%. 1H NMR (400 MHz, Chloroform-d) δ 7.35 – 7.29 (m, 2H), 7.25 – 7.19 (m, 2H), 7.10 – 6.99 (m, 3H), 6.96 – 6.89 (m, 2H), 3.31 (s, 3H). 13C NMR (101 MHz, Chloroform-d) δ 148.66, 147.67, 129.37, 129.05, 125.58, 122.22, 121.44, 120.63, 40.34. HRMS (ESI): Calculated for C13H13ClN [M+H]+: 218.0731; found: 218.0731.

**N-methyl-4-(methylthio)-N-phenylaniline (20):**

The compound was prepared according to the general procedure. Yield: 27.5 mg, 60%. 1H NMR (400 MHz, Chloroform-d) δ 7.35 – 7.23 (m, 4H), 7.04 (d, J = 7.5 Hz, 2H), 7.04 – 6.94 (m, 3H), 3.32 (s, 3H), 2.49 (s, 3H). 13C NMR (101 MHz, Chloroform-d) δ 148.82, 147.15, 129.46, 129.25, 121.49, 120.87, 120.54, 40.27, 17.67. HRMS (ESI): Calculated for C14H16NS [M+H]+: 230.0998; found: 230.0992.

**4-(methyl(phenyl)amino)benzonitrile (21):**

The compound was prepared according to the general procedure. Yield: 24.1 mg, 58%. 1H NMR (400 MHz, Chloroform-d) δ 7.50 – 7.40 (m, 4H), 7.33 – 7.24 (m, 1H), 7.27 – 7.18 (m, 2H), 6.78 – 6.71 (m, 2H), 3.37 (s, 3H). 13C NMR (101 MHz, Chloroform-d) δ 151.96, 146.78, 133.26, 130.07, 126.45, 126.21, 120.35, 113.83, 99.29, 40.16. HRMS (ESI): Calculated for C14H13N2 [M+H]+: 209.1073; found: 209.1071.

**4-(tert-butyl)-N-methyl-N-phenylaniline (22):**

The compound was prepared according to the general procedure. Yield: 24.1 mg, 50%. 1H NMR (400 MHz, Chloroform-d) δ 7.38 – 7.30 (m, 2H), 7.33 – 7.23 (m, 2H), 7.08 – 6.96 (m, 4H), 6.92 (tt, J = 7.3, 1.1 Hz, 1H), 3.33 (s, 3H), 1.35 (s, 9H). 13C NMR (101 MHz, Chloroform-d) δ 149.21, 146.39, 144.81, 129.05, 126.08, 121.25, 120.21, 118.97, 40.24, 34.21, 31.48. HRMS (ESI): Calculated for C17H22N [M+H]+: 240.1747; found: 240.1743.

**4-(9H-carbazol-9-yl)-N-methyl-N-phenylaniline (23):**

The compound was prepared according to the general procedure. Yield: 40.5 mg, 58%. 1H NMR (400 MHz, Chloroform-d) δ 8.17 (d, J = 7.7 Hz, 2H), 7.47 – 7.36 (m, 8H), 7.33 – 7.29 (m, 2H), 7.29 – 7.21 (m, 2H), 7.21 – 7.08 (m, 3H), 3.46 (s, 3H). 13C NMR (101 MHz, Chloroform-d) δ 148.60, 148.34, 141.33, 129.54, 129.45, 127.99, 125.78, 123.09, 123.02, 122.75, 120.22, 119.56, 119.04, 109.84, 40.45. HRMS (ESI): Calculated for C25H21N2 [M+H]+: 349.1699; found: 349.1688.

**methyl 3-(methyl(phenyl)amino)benzoate (24):**

The compound was prepared according to the general procedure. Yield: 29.6 mg, 61%. 1H NMR (400 MHz, Chloroform-d) δ 7.69 – 7.65 (m, 1H), 7.62 – 7.55 (m, 1H), 7.38 – 7.30 (m, 3H), 7.20 – 7.12 (m, 1H), 7.14 – 7.02 (m, 3H), 3.91 (s, 3H), 3.37 (s, 3H). 13C NMR (101 MHz, Chloroform-d) δ 167.29, 149.14, 148.56, 131.15, 129.47, 129.01, 123.33, 122.71, 122.17, 121.38, 119.29, 52.10, 40.34. HRMS (ESI): Calculated for C15H16NO2 [M+H]+: 242.1176; found: 242.1173.

**N-methyl-N-phenyl-[1,1'-biphenyl]-3-amine (25):**

The compound was prepared according to the general procedure. Yield: 37.3 mg, 72%. 1H NMR (400 MHz, Chloroform-d) δ 7.63 – 7.56 (m, 2H), 7.49 – 7.41 (m, 2H), 7.40 – 7.31 (m, 4H), 7.30 – 7.27 (m, 1H), 7.26 – 7.18 (m, 1H), 7.15 – 7.10 (m, 2H), 7.07 – 6.99 (m, 2H), 3.41 (s, 3H). 13C NMR (101 MHz, Chloroform-d) δ 149.44, 148.97, 142.37, 141.36, 129.55, 129.29, 128.69, 127.29, 127.18, 121.55, 120.80, 120.09, 119.09, 118.99, 40.38. HRMS (ESI): Calculated for C19H18N [M+H]+: 260.1434; found: 260.1430.

**3-fluoro-N-methyl-N-phenylaniline (26):**

The compound was prepared according to the general procedure. Yield: 28.5 mg, 71%. 1H NMR (400 MHz, Chloroform-d) δ 163.71 (d, J = 243.2 Hz), 150.81 (d, J = 10.3 Hz), 148.27, 129.97 (d, J = 10.1 Hz), 129.52, 123.71, 123.66, 112.76 (d, J = 2.4 Hz), 105.93 (d, J = 21.4 Hz), 104.16 (d, J = 25.0 Hz), 40.29. 13C NMR (101 MHz, Chloroform-d) δ 163.71 (d, *JC-F* = 243.2 Hz), 150.81 (d, *JC-F* = 10.3 Hz), 148.27, 129.97 (d, *JC-F* = 10.1 Hz), 129.52, 123.71, 123.66, 112.76 (d, *JC-F* = 2.4 Hz), 105.93 (d, *JC-F* = 21.4 Hz), 104.16 (d, *JC-F* = 25.0 Hz), 40.29. 19F NMR (377 MHz, Chloroform-d) δ -112.54. HRMS (ESI): Calculated for C13H13FN [M+H]+: 202.1027; found: 202.1025.

**3-chloro-N-methyl-N-phenylaniline (27):**

The compound was prepared according to the general procedure. Yield: 32.6 mg, 75%. 1H NMR (400 MHz, Chloroform-d) δ 7.29 – 7.23 (m, 2H), 7.09 – 6.96 (m, 4H), 6.81 (t, J = 2.2 Hz, 1H), 6.78 – 6.71 (m, 1H), 6.69 (dd, J = 8.3, 2.1 Hz, 1H), 3.22 (s, 3H). 13C NMR (101 MHz, Chloroform-d) δ 149.20, 147.19, 133.74, 128.87, 128.49, 122.44, 122.30, 118.46, 116.40, 114.72, 39.22. HRMS (ESI): Calculated for C13H13ClN [M+H]+: 218.0731; found: 218.0731.

**3-(methyl(phenyl)amino)benzonitrile (28):**

The compound was prepared according to the general procedure. Yield: 19.1 mg, 46%. 1H NMR (400 MHz, Chloroform-d) δ 7.46 – 7.36 (m, 2H), 7.31 – 7.27 (m, 1H), 7.25 – 7.13 (m, 3H), 7.12 – 7.01 (m, 3H), 3.34 (s, 3H). 13C NMR (101 MHz, Chloroform-d) δ 149.41, 147.52, 129.90, 129.69, 124.92, 124.80, 121.92, 120.09, 119.38, 118.69, 112.83, 40.17. HRMS (ESI): Calculated for C14H13N2 [M+H]+: 209.1073; found: 209.1071.

**N,3,5-trimethyl-N-phenylaniline (29):**

The compound was prepared according to the general procedure. Yield: 21.5 mg, 51%. 1H NMR (400 MHz, Chloroform-d) δ 7.33 – 7.24 (m, 2H), 7.02 (d, J = 7.4 Hz, 2H), 6.95 (t, J = 7.3 Hz, 1H), 6.69 (d, J = 12.9 Hz, 3H), 3.32 (s, 3H), 2.30 (s, 6H).13C NMR (101 MHz, Chloroform-d) δ 149.23, 149.02, 138.84, 129.08, 123.54, 120.64, 119.83, 118.87, 40.31, 21.46. HRMS (ESI): Calculated for C15H18N [M+H]+: 212.1434; found: 212.1431.

**3-chloro-5-fluoro-N-methyl-N-phenylaniline (30):**

The compound was prepared according to the general procedure. Yield: 29.1 mg, 62%. 1H NMR (400 MHz, Chloroform-d) δ 7.36 – 7.26 (m, 2H), 7.17 – 7.04 (m, 3H), 6.49 – 6.46 (m, 1H), 6.42 (dt, J = 8.3, 2.1 Hz, 1H), 6.29 (dt, J = 11.9, 2.3 Hz, 1H), 3.21 (s, 3H). 13C NMR (101 MHz, Chloroform-d) δ 162.42 (d, *JC-F* = 245.2 Hz), 150.11 (d, *JC-F* = 11.9 Hz), 146.35, 134.18 (d, *JC-F* = 13.7 Hz), 128.81, 124.44, 124.22, 110.01 (d, *JC-F* = 2.7 Hz), 104.67 (d, *JC-F* = 25.6 Hz), 99.71 (d, *JC-F* = 25.8 Hz), 39.29. 19F NMR (377 MHz, Chloroform-d) δ -111.20. HRMS (ESI): Calculated for C13H12ClFN [M+H]+: 236.0637; found: 236.0635.

**N-methyl-N-phenyl-[1,1':3',1''-terphenyl]-5'-amine (31):**

The compound was prepared according to the general procedure. Yield: 45.5 mg, 68%. 1H NMR (400 MHz, Chloroform-d) δ 7.70 – 7.62 (m, 4H), 7.53 – 7.41 (m, 5H), 7.44 – 7.32 (m, 4H), 7.30 – 7.26 (m, 2H), 7.24 – 7.16 (m, 2H), 7.10 – 7.01 (m, 1H), 3.48 (s, 3H). 13C NMR (101 MHz, Chloroform-d) δ 149.85, 148.94, 142.84, 141.40, 129.38, 128.75, 127.44, 127.29, 121.82, 121.12, 119.18, 117.75, 40.52. HRMS (ESI): Calculated for C25H22N [M+H]+: 336.1747; found: 336.1745.

**N-methyl-N-phenylaniline (32):**

The compound was prepared according to the general procedure. Yield: 19.7 mg, 54%. 1H NMR (400 MHz, Chloroform-d) δ 7.35 – 7.25 (m, 4H), 7.05 (d, J = 7.6 Hz, 4H), 6.98 (t, J = 7.3 Hz, 2H), 3.34 (s, 3H). 13C NMR (101 MHz, Chloroform-d) δ 149.03, 129.18, 121.25, 120.44, 40.24. HRMS (ESI): Calculated for C13H14N [M+H]+: 184.1121; found: 184.1120.

**N-methyl-N-phenylnaphthalen-2-amine (33):**

The compound was prepared according to the general procedure. Yield: 34.3 mg, 74%. 1H NMR (400 MHz, Chloroform-d) δ 7.77 (d, J = 8.3 Hz, 1H), 7.76 – 7.68 (m, 2H), 7.49 – 7.40 (m, 1H), 7.39 – 7.29 (m, 4H), 7.24 (dd, J = 8.9, 2.4 Hz, 1H), 7.18 – 7.10 (m, 2H), 7.09 – 7.00 (m, 1H), 3.46 (s, 3H). 13C NMR (101 MHz, Chloroform-d) δ 149.10, 146.63, 134.70, 129.30, 129.13, 128.58, 127.55, 126.74, 126.26, 123.72, 121.96, 121.82, 121.41, 114.60, 40.63. HRMS (ESI): Calculated for C17H16N [M+H]+: 234.1277; found: 234.1274.

**N-methyl-N-phenylbenzo[b]thiophen-5-amine (34):**

The compound was prepared according to the general procedure. Yield: 34.2 mg, 72%. 1H NMR (400 MHz, Chloroform-d) δ 7.80 (d, J = 8.7 Hz, 1H), 7.56 (d, J = 2.2 Hz, 1H), 7.47 (d, J = 5.4 Hz, 1H), 7.34 – 7.24 (m, 3H), 7.17 (dd, J = 8.7, 2.2 Hz, 1H), 7.00 (d, J = 7.9 Hz, 2H), 6.93 (t, J = 7.4 Hz, 1H), 3.40 (s, 3H). 13C NMR (101 MHz, Chloroform-d) δ 149.59, 146.28, 140.90, 134.14, 129.12, 127.22, 123.71, 123.04, 121.04, 120.10, 118.47, 116.69, 40.76. HRMS (ESI): Calculated for C15H14NS [M+H]+: 240.0841; found: 240.0839.

**N-methyl-N-phenylbenzofuran-5-amine (35):**

The compound was prepared according to the general procedure. Yield: 33.0 mg, 74%. 1H NMR (400 MHz, Chloroform-d) δ 7.65 (d, J = 2.2 Hz, 1H), 7.49 (d, J = 8.8 Hz, 1H), 7.40 (d, J = 2.2 Hz, 1H), 7.28 – 7.19 (m, 2H), 7.13 (dd, J = 8.8, 2.3 Hz, 1H), 6.89 – 6.78 (m, 3H), 6.75 (dd, J = 2.2, 1.0 Hz, 1H), 3.35 (s, 3H). 13C NMR (101 MHz, Chloroform-d) δ 152.04, 150.01, 145.69, 144.65, 128.93, 128.41, 122.33, 118.57, 117.13, 116.08, 112.10, 106.70, 40.90. HRMS (ESI): Calculated for C15H14NO [M+H]+: 224.1070; found: 224.1067.

**ethyl 5-(methyl(phenyl)amino)benzofuran-2-carboxylate (36):**

The compound was prepared according to the general procedure. Yield: 40.7 mg, 69%. 1H NMR (400 MHz, Chloroform-d) δ 7.53 (d, J = 8.6 Hz, 1H), 7.48 (d, J = 0.9 Hz, 1H), 7.39 (d, J = 2.3 Hz, 1H), 7.27 – 7.21 (m, 3H), 6.96 – 6.86 (m, 3H), 4.47 (q, J = 7.1 Hz, 2H), 3.36 (s, 3H), 1.46 (t, J = 7.1 Hz, 3H). 13C NMR (101 MHz, Chloroform-d) δ 159.56, 152.31, 149.59, 146.32, 145.68, 129.14, 127.92, 124.71, 119.97, 117.90, 115.98, 113.75, 113.01, 61.52, 40.90, 14.36. HRMS (ESI): Calculated for C18H18NO3 [M+H]+: 296.1281; found: 296.1276.

**N-methyl-N-phenyldibenzo[b,d]thiophen-2-amine (37):**

The compound was prepared according to the general procedure. Yield: 34.7 mg, 60%. 1H NMR (400 MHz, Chloroform-d) δ 8.09 – 8.02 (m, 1H), 8.00 (d, J = 8.7 Hz, 1H), 7.86 – 7.79 (m, 1H), 7.49 – 7.32 (m, 5H), 7.22 – 7.03 (m, 4H), 3.44 (s, 3H). 13C NMR (101 MHz, Chloroform-d) δ 148.92, 148.36, 140.96, 138.71, 135.69, 129.43, 128.97, 125.44, 124.36, 122.66, 122.38, 121.90, 121.88, 120.68, 117.43, 112.05, 40.66. HRMS (ESI): Calculated for C19H16NS [M+H]+: 290.0998; found: 290.0992.

**N-methyl-N-phenyl-9H-fluoren-3-amine (38):**

The compound was prepared according to the general procedure. Yield: 30.3 mg, 56%. 1H NMR (400 MHz, Chloroform-d) δ 7.72 (t, J = 8.2 Hz, 2H), 7.53 (d, J = 7.4 Hz, 1H), 7.38 (t, J = 7.5 Hz, 1H), 7.36 – 7.22 (m, 4H), 7.14 – 7.03 (m, 3H), 7.03 – 6.94 (m, 1H), 3.88 (s, 2H), 3.40 (s, 3H). 13C NMR (101 MHz, Chloroform-d) δ 149.32, 148.27, 144.71, 142.91, 141.71, 135.72, 129.19, 126.73, 125.73, 124.87, 120.86, 120.43, 120.08, 119.88, 119.18, 117.83, 40.58, 36.98. HRMS (ESI): Calculated for C20H18N [M+H]+: 272.1434; found: 272.1425.

**methyl 4-(methyl(p-tolyl)amino)benzoate (39):**

The compound was prepared according to the general procedure. Yield: 33.1 mg, 65%. 1H NMR (400 MHz, Chloroform-d) δ 7.89 – 7.78 (m, 2H), 7.21 (d, J = 8.0 Hz, 2H), 7.10 (d, J = 8.3 Hz, 2H), 6.75 – 6.66 (m, 2H), 3.85 (s, 3H), 3.33 (s, 3H), 2.37 (s, 3H). 13C NMR (101 MHz, Chloroform-d) δ 167.30, 152.74, 144.89, 135.46, 130.99, 130.46, 126.25, 118.56, 113.08, 51.57, 40.27, 21.01. HRMS (ESI): Calculated for C16H18NO2 [M+H]+: 256.1332; found: 256.1328.

**methyl 4-((4-chlorophenyl)(methyl)amino)benzoate (40):**

The compound was prepared according to the general procedure. Yield: 25.9 mg, 47%. 1H NMR (400 MHz, Chloroform-d) δ 7.95 – 7.83 (m, 2H), 7.44 – 7.34 (m, 2H), 7.19 – 7.11 (m, 2H), 6.87 – 6.76 (m, 2H), 3.89 (s, 3H), 3.36 (s, 3H). 13C NMR (101 MHz, Chloroform-d) δ 167.09, 152.20, 146.12, 131.06, 130.27, 129.89, 126.72, 119.94, 114.43, 51.68, 40.23. HRMS (ESI): Calculated for C15H15ClNO2 [M+H]+: 276.0786; found: 276.0787.

**3-chloro-N-(4-fluorophenyl)-N-methylaniline (41):**

The compound was prepared according to the general procedure. Yield: 21.2 mg, 45%. 1H NMR (400 MHz, Chloroform-d) δ 7.19 – 7.02 (m, 5H), 6.84 – 6.76 (m, 2H), 6.71 – 6.63 (m, 1H), 3.28 (s, 3H). 13C NMR (101 MHz, Chloroform-d) δ 159.69 (d, *JC-F* = 244.0 Hz), 150.42, 144.29 (d, *JC-F* = 2.9 Hz), 134.85, 129.92, 126.56 (d, *JC-F* = 8.1 Hz), 118.72, 116.44 (d, *JC-F* = 22.4 Hz), 115.75, 114.08, 40.50. 19F NMR (377 MHz, Chloroform-d) δ -118.00. HRMS (ESI): Calculated for C13H12ClFN [M+H]+: 236.0637; found: 236.0635.

**3-chloro-N-(4-chlorophenyl)-N-methylaniline (42):**

The compound was prepared according to the general procedure. Yield: 28.1 mg, 56%. 1H NMR (400 MHz, Chloroform-d) δ 7.33 – 7.26 (m, 2H), 7.18 (t, J = 8.0 Hz, 1H), 7.07 – 7.00 (m, 2H), 6.96 – 6.87 (m, 2H), 6.86 – 6.78 (m, 1H), 3.30 (s, 3H). 13C NMR (101 MHz, Chloroform-d) δ 149.89, 146.86, 134.91, 130.10, 129.51, 128.03, 123.70, 120.50, 118.50, 116.74, 40.33. HRMS (ESI): Calculated for C13H12Cl2N [M+H]+: 252.0341; found: 252.0341.

**methyl 4-(methyl(m-tolyl)amino)benzoate (43):**

The compound was prepared according to the general procedure. Yield: 28.5 mg, 56%. 1H NMR (400 MHz, Chloroform-d) δ 7.89 – 7.81 (m, 2H), 7.35 – 7.22 (m, 1H), 7.06 – 6.96 (m, 3H), 6.80 – 6.69 (m, 2H), 3.85 (s, 3H), 3.34 (s, 3H), 2.35 (s, 3H).13C NMR (101 MHz, Chloroform-d) δ 167.27, 152.63, 147.45, 139.79, 130.98, 129.59, 126.61, 126.24, 122.98, 118.91, 113.64, 51.59, 40.21, 21.40. HRMS (ESI): Calculated for C16H18NO2 [M+H]+: 256.1332; found: 256.1328.

**methyl 4-((3-chlorophenyl)(methyl)amino)benzoate (44):**

The compound was prepared according to the general procedure. Yield: 23.1 mg, 42%. 1H NMR (400 MHz, Chloroform-d) δ 7.98 – 7.86 (m, 2H), 7.32 (d, J = 8.0 Hz, 1H), 7.20 (t, J = 2.1 Hz, 1H), 7.19 – 7.11 (m, 1H), 7.13 – 7.05 (m, 1H), 6.92 – 6.85 (m, 2H), 3.90 (s, 3H), 3.38 (s, 3H). 13C NMR (101 MHz, Chloroform-d) δ 167.01, 152.00, 148.84, 135.13, 131.08, 130.58, 124.58, 124.51, 122.60, 120.76, 115.64, 51.74, 40.18. HRMS (ESI): Calculated for C15H15ClNO2 [M+H]+: 276.0786; found: 276.0786.

**methyl 4-((3-bromophenyl)(methyl)amino)benzoate (45):**

The compound was prepared according to the general procedure. Yield: 19.1 mg, 30%. 1H NMR (400 MHz, Chloroform-d) δ 7.97 – 7.89 (m, 2H), 7.35 (t, J = 2.0 Hz, 1H), 7.32 – 7.29 (m, 1H), 7.25 (t, J = 7.9 Hz, 1H), 7.16 – 7.11 (m, 1H), 6.93 – 6.85 (m, 2H), 3.90 (s, 3H), 3.38 (s, 3H). 13C NMR (101 MHz, Chloroform-d) δ 167.02, 151.97, 148.98, 131.08, 130.87, 127.53, 127.45, 123.14, 123.09, 120.75, 115.58, 51.74, 40.20. HRMS (ESI): Calculated for C15H15BrNO2 [M+H]+: 320.0281; found: 320.0281.

**N-(3-chlorophenyl)-N-methylnaphthalen-2-amine (46):**

The compound was prepared according to the general procedure. Yield: 23.0 mg, 43%. 1H NMR (400 MHz, Chloroform-d) δ 7.85 – 7.72 (m, 3H), 7.53 – 7.44 (m, 2H), 7.46 – 7.37 (m, 1H), 7.31 – 7.27 (m, 1H), 7.18 (t, J = 8.1 Hz, 1H), 7.00 (t, J = 2.2 Hz, 1H), 6.95 – 6.85 (m, 2H), 3.44 (s, 3H).13C NMR (101 MHz, Chloroform-d) δ 150.28, 145.76, 134.87, 134.52, 130.16, 130.02, 129.12, 127.62, 127.07, 126.41, 124.68, 123.30, 120.24, 118.60, 118.49, 116.78, 40.56. HRMS (ESI): Calculated for C17H15ClN [M+H]+: 268.0888; found: 268.0887.

**methyl 4-(indolin-1-yl)benzoate (47):**

The compound was prepared according to the general procedure. Yield: 19.2 mg, 38%. 1H NMR (400 MHz, Chloroform-d) δ 8.03 (d, J = 8.9 Hz, 2H), 7.31 (d, J = 8.0 Hz, 1H), 7.24 (d, J = 8.8 Hz, 3H), 7.16 (t, J = 7.7 Hz, 1H), 6.87 (t, J = 7.3 Hz, 1H), 4.05 (t, J = 8.4 Hz, 2H), 3.92 (s, 3H), 3.19 (t, J = 8.3 Hz, 2H). 13C NMR (101 MHz, Chloroform-d) δ 166.96, 147.78, 145.31, 131.97, 131.11, 127.15, 125.31, 121.05, 120.32, 115.33, 109.61, 51.81, 51.78, 28.05. HRMS (ESI): Calculated for C16H16NO2 [M+H]+: 254.1176; found: 254.1172.

**methyl 4-(3,4-dihydroquinolin-1(2H)-yl)benzoate (48):**

The compound was prepared according to the general procedure. Yield: 31.0 mg, 58%. 1H NMR (400 MHz, Chloroform-d) δ 8.01 – 7.92 (m, 2H), 7.26 – 7.20 (m, 2H), 7.18 – 7.10 (m, 2H), 7.10 – 7.01 (m, 1H), 6.94 – 6.85 (m, 1H), 3.92 (s, 3H), 3.71 (t, J = 6.1 Hz, 2H), 2.82 (t, J = 6.4 Hz, 2H), 2.05 (p, J = 6.3 Hz, 2H). 13C NMR (101 MHz, Chloroform-d) δ 166.92, 152.17, 142.11, 130.89, 129.28, 128.58, 126.33, 122.31, 121.03, 119.60, 118.98, 51.81, 49.25, 27.43, 23.58. HRMS (ESI): Calculated for C17H18NO2 [M+H]+: 268.1332; found: 268.1327.

**methyl 4-(6-methyl-3,4-dihydroquinolin-1(2H)-yl)benzoate (49):**

The compound was prepared according to the general procedure. Yield: 22.5 mg, 40%. 1H NMR (400 MHz, Chloroform-d) δ 7.98 – 7.87 (m, 2H), 7.23 – 7.15 (m, 2H), 7.08 (d, J = 8.2 Hz, 1H), 6.96 (s, 1H), 6.93 – 6.86 (m, 1H), 3.90 (s, 3H), 3.68 (t, J = 6.1 Hz, 2H), 2.76 (t, J = 6.4 Hz, 2H), 2.30 (s, 3H), 2.02 (p, J = 6.3 Hz, 2H). 13C NMR (101 MHz, Chloroform-d) δ 166.98, 152.33, 139.36, 130.85, 130.82, 129.71, 129.12, 126.95, 121.57, 119.57, 118.68, 51.75, 49.06, 27.34, 23.74, 20.65. HRMS (ESI): Calculated for C18H20NO2 [M+H]+: 282.1489; found: 282.1486.

**methyl 4-(6-chloro-3,4-dihydroquinolin-1(2H)-yl)benzoate (50):**

The compound was prepared according to the general procedure. Yield: 35.5 mg, 59%. 1H NMR (400 MHz, Chloroform-d) δ 8.00 – 7.93 (m, 2H), 7.25 – 7.17 (m, 2H), 7.10 (d, J = 2.2 Hz, 1H), 7.05 – 6.97 (m, 2H), 3.92 (s, 3H), 3.68 (t, J = 6.0 Hz, 2H), 2.79 (t, J = 6.4 Hz, 2H), 2.03 (p, J = 12.9, 6.3 Hz, 2H). 13C NMR (101 MHz, Chloroform-d) δ 166.79, 151.86, 140.85, 130.99, 129.83, 128.92, 126.33, 125.39, 122.92, 120.00, 119.91, 51.88, 49.33, 27.34, 23.17. HRMS (ESI): Calculated for C17H17ClNO2 [M+H]+: 302.0942; found: 302.0941.

**(7R,11R,E)-3,7,11,15-tetramethylhexadec-2-en-1-yl 4-(methyl(phenyl)amino)benzoate (51):**

The compound was prepared according to the general procedure. Yield: 65.8 mg, 65%. 1H NMR (400 MHz, Chloroform-d) δ 7.96 – 7.87 (m, 2H), 7.48 – 7.36 (m, 2H), 7.27 – 7.14 (m, 3H), 6.81 – 6.77 (m, 2H), 5.53 – 5.41 (m, 1H), 4.82 (d, J = 6.9 Hz, 2H), 3.39 (s, 3H), 2.05 (t, J = 7.8 Hz, 2H), 1.77 (s, 3H), 1.59 – 1.51 (m, 1H), 1.52 – 1.35 (m, 4H), 1.35 – 1.22 (m, 8H), 1.20 – 1.14 (m, 2H), 1.14 – 1.03 (m, 4H), 0.90 (s, 3H), 0.88 (d, J = 3.4 Hz, 6H), 0.87 (d, J = 3.9 Hz, 3H). 13C NMR (101 MHz, Chloroform-d) δ 166.79, 152.45, 147.59, 142.17, 131.02, 129.76, 125.73, 125.19, 119.65, 118.65, 113.92, 61.35, 40.22, 39.90, 39.39, 37.44, 37.38, 37.31, 36.66, 32.80, 32.68, 29.72, 27.99, 25.08, 24.81, 24.48, 22.70 (d, J = 9.5 Hz), 19.76 (d, J = 3.0 Hz), 16.48. HRMS (ESI): Calculated for C34H52NO2 [M+H]+: 506.3993; found: 506.3976.

**(1S,2R,5S)-2-isopropyl-5-methylcyclohexyl 4-(methyl(phenyl)amino)benzoate (52):**

The compound was prepared according to the general procedure. Yield: 43.3 mg, 59%. 1H NMR (400 MHz, Chloroform-d) δ 7.94 – 7.87 (m, 2H), 7.46 – 7.37 (m, 2H), 7.26 – 7.17 (m, 3H), 6.81 (d, J = 8.9 Hz, 2H), 4.90 (td, J = 10.8, 4.4 Hz, 1H), 3.39 (s, 3H), 2.20 – 2.09 (m, 1H), 1.99 (pd, J = 7.0, 2.7 Hz, 1H), 1.74 (dt, J = 14.7, 3.3 Hz, 2H), 1.65 – 1.48 (m, 2H), 1.23 – 1.02 (m, 2H), 0.93 (t, J = 6.9 Hz, 6H), 0.81 (d, J = 6.9 Hz, 3H). 13C NMR (101 MHz, Chloroform-d) δ 166.21, 152.43, 147.61, 130.96, 129.76, 125.68, 125.16, 120.04, 114.01, 74.01, 47.38, 41.15, 40.21, 34.42, 31.46, 26.54, 23.76, 22.09, 20.79, 16.64. HRMS (ESI): Calculated for C24H32NO2 [M+H]+: 366.2428; found: 366.2413.

**3-((5-(4-fluorophenyl)thiophen-2-yl)methyl)-N,4-dimethyl-N-phenylaniline (53):**

The compound was prepared according to the general procedure. Yield: 37.2 mg, 48%. 1H NMR (400 MHz, Chloroform-d) δ 7.54 – 7.47 (m, 2H), 7.31 – 7.24 (m, 2H), 7.14 (d, J = 8.1 Hz, 1H), 7.10 – 7.03 (m, 3H), 7.03 – 6.97 (m, 3H), 6.96 – 6.88 (m, 2H), 6.71 (d, J = 3.6 Hz, 1H), 4.10 (s, 2H), 3.33 (s, 3H), 2.32 (s, 3H). 13C NMR (101 MHz, Chloroform-d) δ 163.30, 160.85, 149.21, 147.19, 143.52, 141.47, 139.07, 131.27, 130.91 (d, *JC-F* = 3.4 Hz), 130.14, 129.05, 127.12 (d, *JC-F* = 7.9 Hz), 125.85, 123.34, 122.66, 120.34 (d, *JC-F* = 48.9 Hz), 118.68, 115.71 (d, *JC-F* = 21.8 Hz), 40.32, 34.33, 18.76. 19F NMR (377 MHz, Chloroform-d) δ -115.24. HRMS (ESI): Calculated for C25H23FNS [M+H]+: 388.1530; found: 388.1522.

**N-(4-(methyl(phenyl)amino)phenyl)-3-phenylpropanamide (54):**

The compound was prepared according to the general procedure. Yield: 30.4 mg, 46%. 1H NMR (400 MHz, Chloroform-d) δ 7.38 – 7.31 (m, 5H), 7.30 – 7.22 (m, 5H), 7.06 – 6.89 (m, 5H), 3.30 (s, 3H), 3.09 (t, J = 7.6 Hz, 2H), 2.68 (t, J = 7.6 Hz, 2H). 13C NMR (101 MHz, Chloroform-d) δ 170.23, 149.06, 145.66, 140.68, 131.86, 129.14, 128.66, 128.43, 126.40, 121.95, 121.45, 120.62, 119.24, 40.33, 39.41, 31.67. HRMS (ESI): Calculated for C22H23N2O [M+H]+: 331.1805; found: 331.1808.

**methyl 4-((4-(5-(p-tolyl)-3-(trifluoromethyl)-1H-pyrazol-1-yl)phenyl)sulfonamido)benzoate (55):**

The compound was prepared according to the general procedure. Yield: 53.6 mg, 52%. 1H NMR (400 MHz, Chloroform-d) δ 7.95 (d, J = 8.7 Hz, 2H), 7.80 (d, J = 8.7 Hz, 2H), 7.43 (d, J = 8.7 Hz, 2H), 7.27 (s, 1H), 7.15 (d, J = 8.7 Hz, 4H), 7.05 (d, J = 8.1 Hz, 2H), 6.73 (s, 1H), 3.91 (s, 3H), 2.39 (s, 3H), 2.21 (s, 1H). 13C NMR (101 MHz, Chloroform-d) δ 211.19, 166.22, 145.28, 144.23 (d, *JC-F* = 38.6 Hz), 142.98, 140.36, 139.88, 137.94, 131.18, 129.73, 128.66, 128.22, 126.88, 125.54, 119.76, 106.41 (d, *JC-F* = 2.2 Hz), 52.21, 29.26, 21.29. 19F NMR (377 MHz, Chloroform-d) δ -62.52. HRMS (ESI): Calculated for C25H21F3N3O4S [M+H]+: 516.1199; found: 516.1208.

**isopropyl 2-methyl-2-(4-(4-(methyl(phenyl)amino)benzoyl)phenoxy)propanoate (56):**

The compound was prepared according to the general procedure. Yield: 42.3 mg, 49%. 1H NMR (400 MHz, Chloroform-d) δ 7.73 (d, J = 7.3 Hz, 4H), 7.48 – 7.39 (m, 2H), 7.29 – 7.20 (m, 3H), 6.91 – 6.85 (m, 2H), 6.84 – 6.78 (m, 2H), 5.11 (hept, J = 6.3 Hz, 1H), 3.41 (s, 3H), 1.67 (s, 6H), 1.23 (d, J = 6.3 Hz, 6H). 13C NMR (101 MHz, Chloroform-d) δ 194.11, 173.34, 158.68, 152.27, 147.40, 132.08, 131.97, 131.48, 129.84, 127.28, 125.94, 125.45, 117.21, 113.59, 69.24, 40.25, 25.40, 21.55. HRMS (ESI): Calculated for C27H30NO4 [M+H]+: 432.2169; found: 432.2164.

**methyl 2-(5-methoxy-2-methyl-1-(4-(methyl(phenyl)amino)benzoyl)-1H-indol-3-yl)acetate (57):**

The compound was prepared according to the general procedure. Yield: 37.1 mg, 42%. 1H NMR (400 MHz, Chloroform-d) δ 7.67 – 7.58 (m, 2H), 7.49 – 7.41 (m, 2H), 7.29 – 7.24 (m, 3H), 7.06 – 6.95 (m, 2H), 6.82 – 6.75 (m, 2H), 6.71 (dd, J = 9.0, 2.5 Hz, 1H), 3.87 (s, 3H), 3.72 (s, 3H), 3.70 (s, 2H), 3.42 (s, 3H), 2.44 (s, 3H). 13C NMR (101 MHz, Chloroform-d) δ 171.70, 168.89, 155.46, 152.92, 147.04, 136.14, 132.37, 131.33, 130.04, 129.95, 126.34, 125.96, 123.24, 114.63, 113.35, 111.28, 110.67, 100.78, 55.76, 52.08, 40.30, 30.30, 12.87. HRMS (ESI): Calculated for C27H27N2O4 [M+H]+: 443.1965; found: 443.1952.

**N,6'-dimethyl-3-(4-(methylsulfonyl)phenyl)-N-phenyl-[2,3'-bipyridin]-5-amine (58):**

The compound was prepared according to the general procedure. Yield: 57.5 mg, 67%. 1H NMR (400 MHz, Chloroform-d) δ 8.43 – 8.36 (m, 2H), 7.87 (d, J = 8.4 Hz, 2H), 7.56 (dd, J = 8.0, 2.4 Hz, 1H), 7.49 – 7.36 (m, 4H), 7.26 (d, J = 7.2 Hz, 2H), 7.21 (t, J = 7.4 Hz, 1H), 7.14 (d, J = 2.8 Hz, 1H), 7.07 (d, J = 8.0 Hz, 1H), 3.45 (s, 3H), 3.09 (s, 3H), 2.54 (s, 3H). 13C NMR (101 MHz, Chloroform-d) δ 157.13, 149.88, 147.06, 145.79, 144.18, 144.02, 139.49, 138.29, 137.10, 134.24, 132.27, 130.44, 129.96, 127.65, 124.92, 124.41, 124.29, 122.62, 44.55, 40.08, 24.20. HRMS (ESI): Calculated for C25H24N3O2S [M+H]+: 430.1584; found: 430.1583.

# 10. 1H and 13C Spectra of all products

1H NMR (400 MHz, CDCl3) spectrum of **3**.


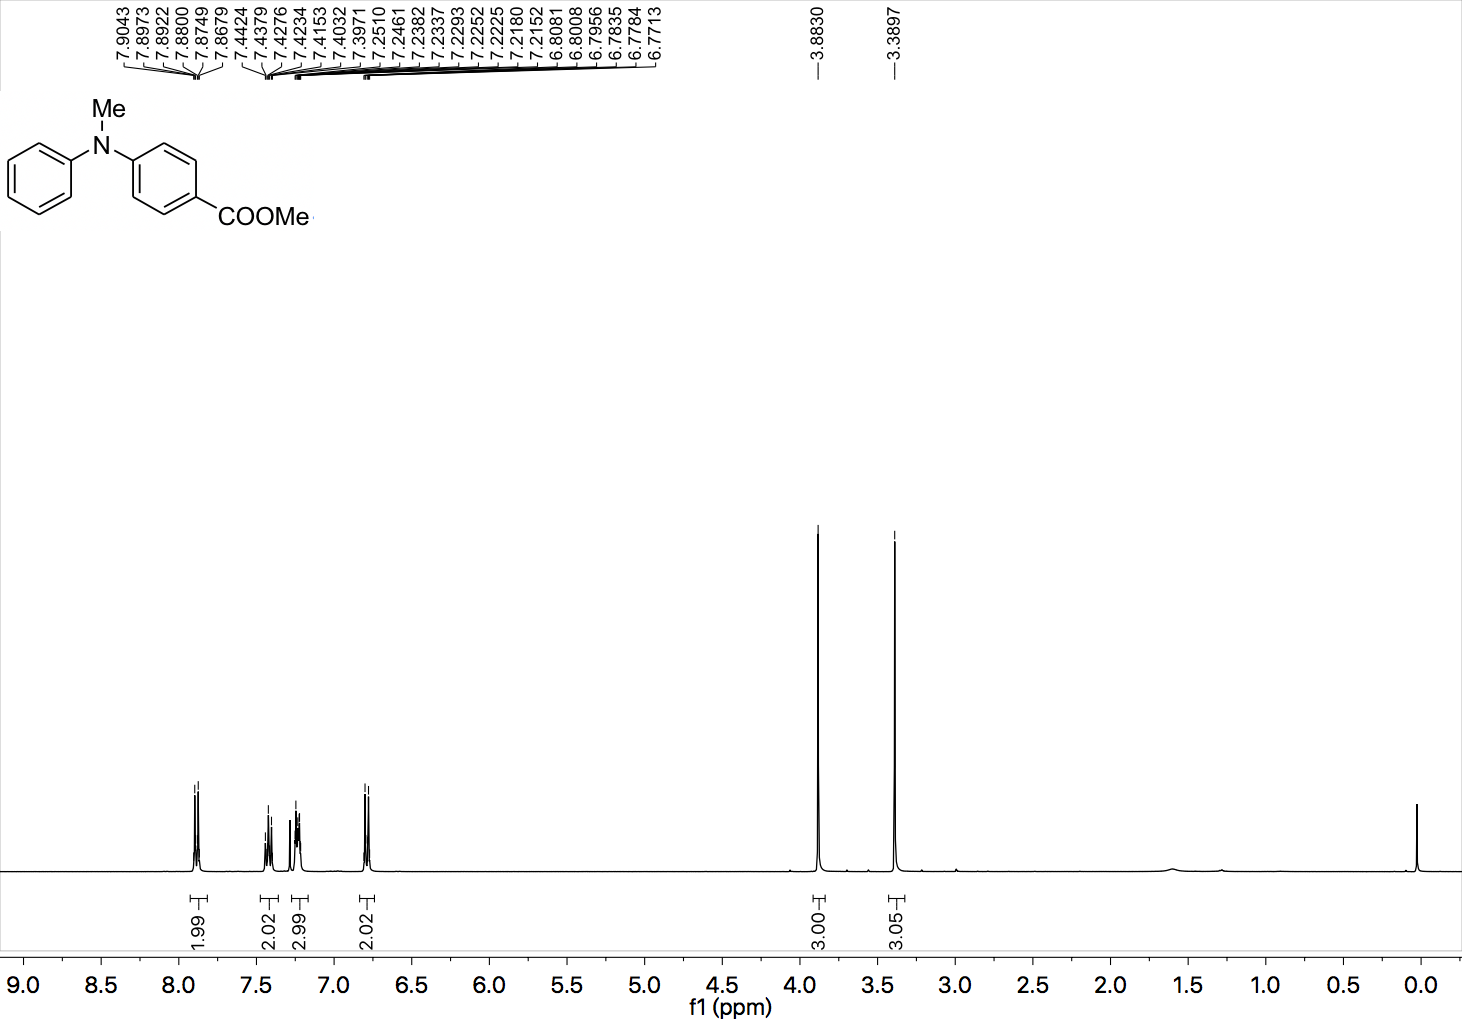


13C NMR (101 MHz, CDCl3) spectrum of **3**.


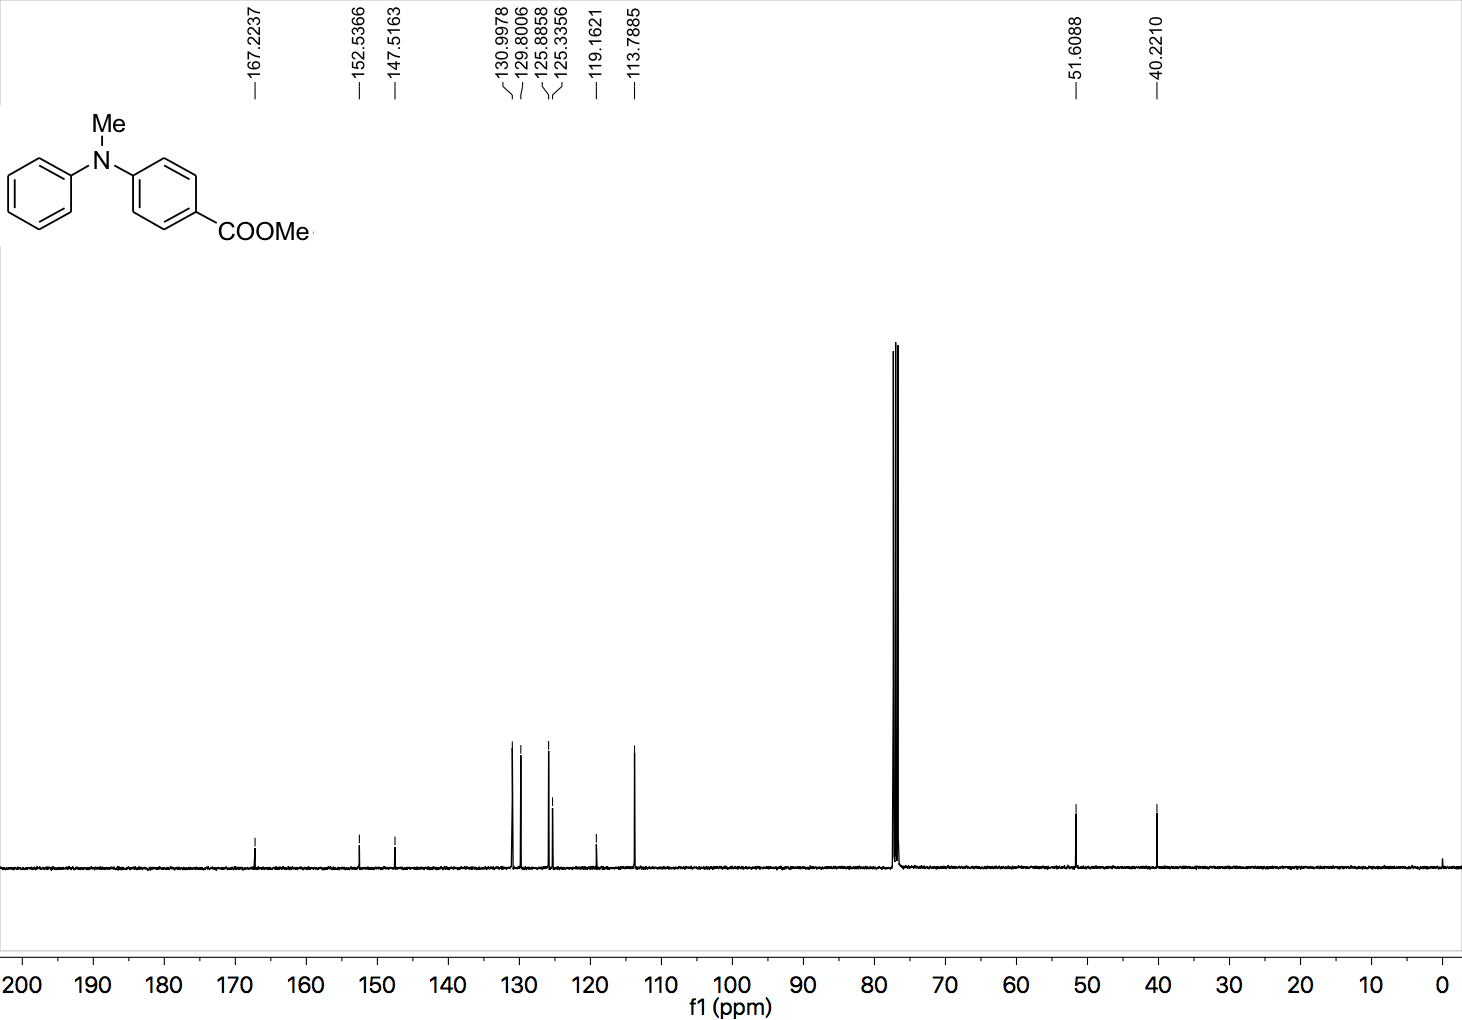


1H NMR (400 MHz, CDCl3) spectrum of **16**.


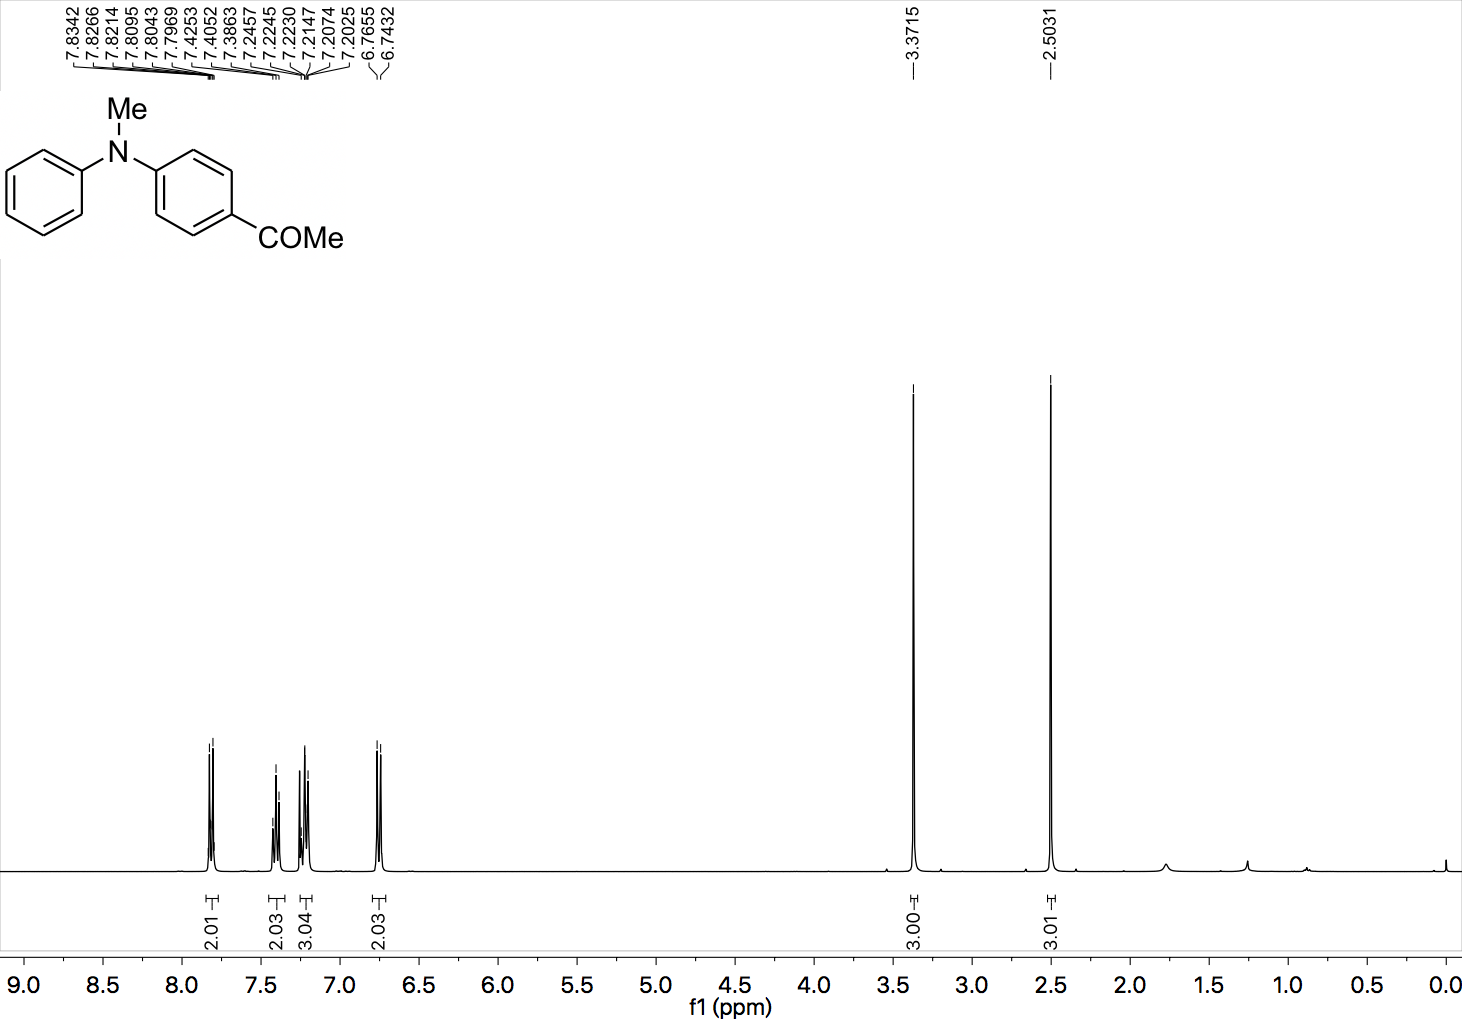


13C NMR (101 MHz, CDCl3) spectrum of **16**.


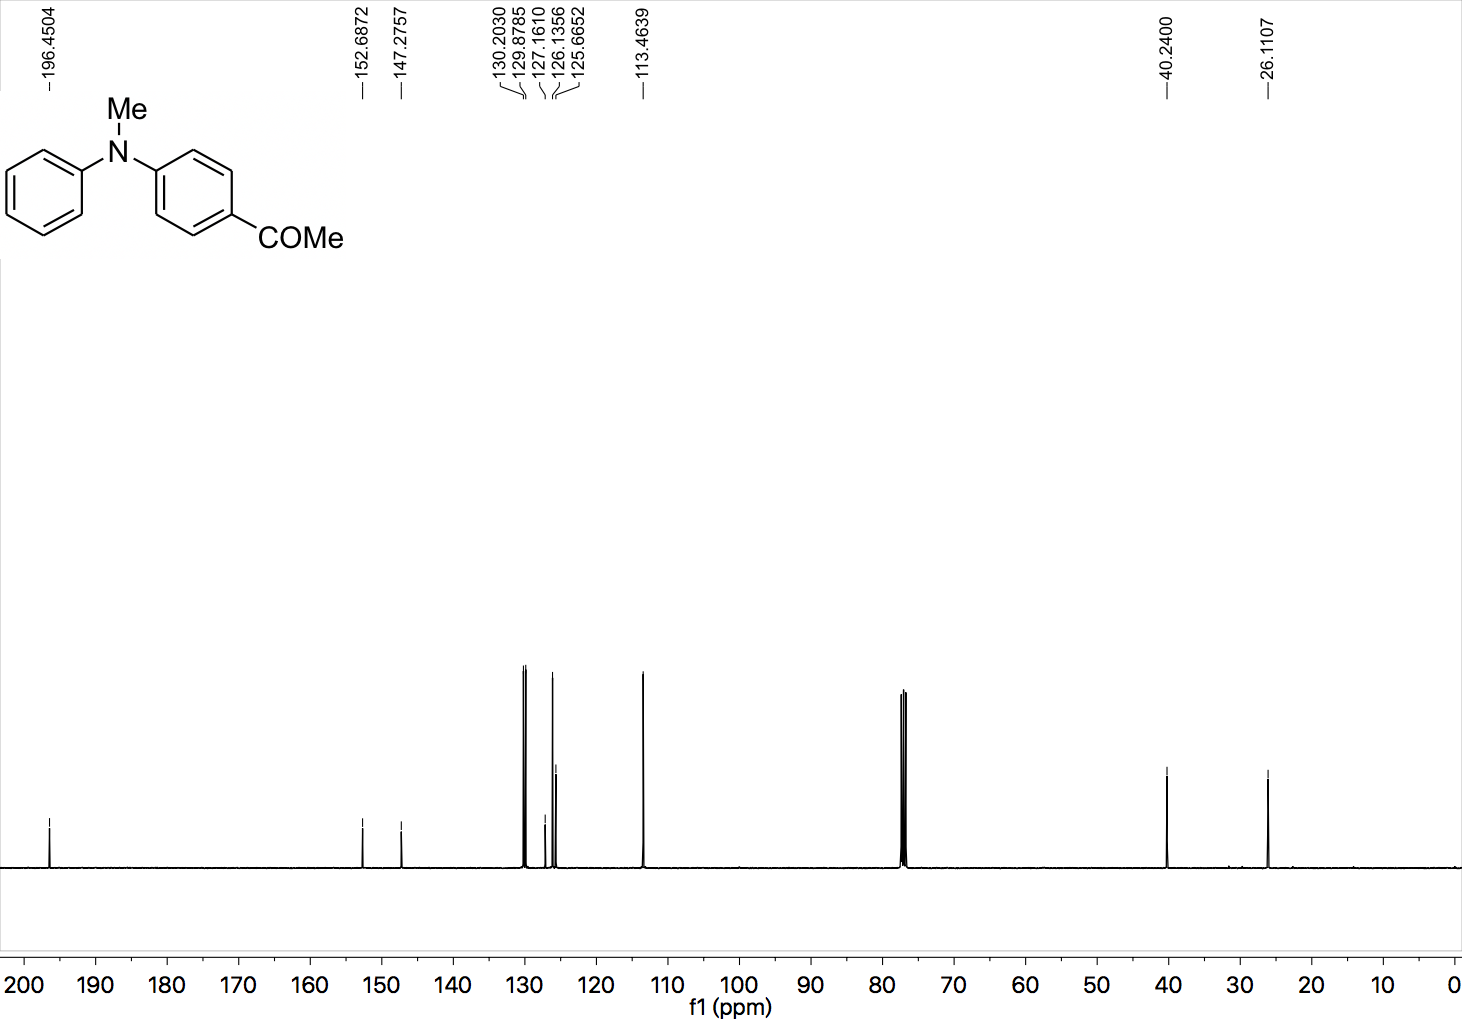


1H NMR (400 MHz, CDCl3) spectrum of **17**.


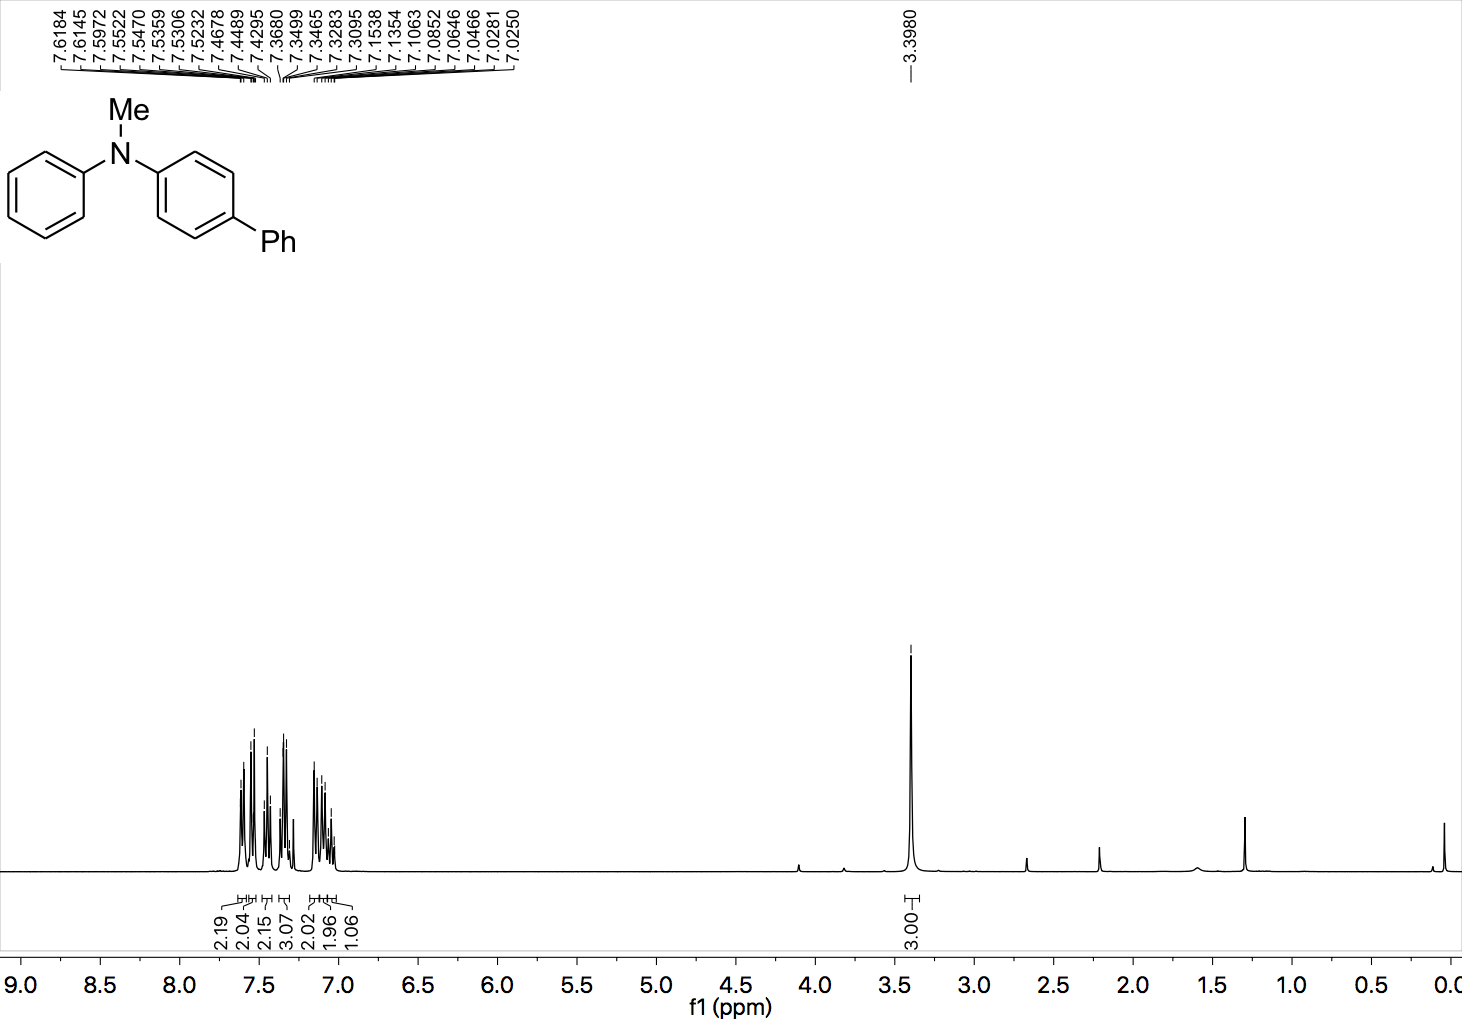


13C NMR (101 MHz, CDCl3) spectrum of **17**.


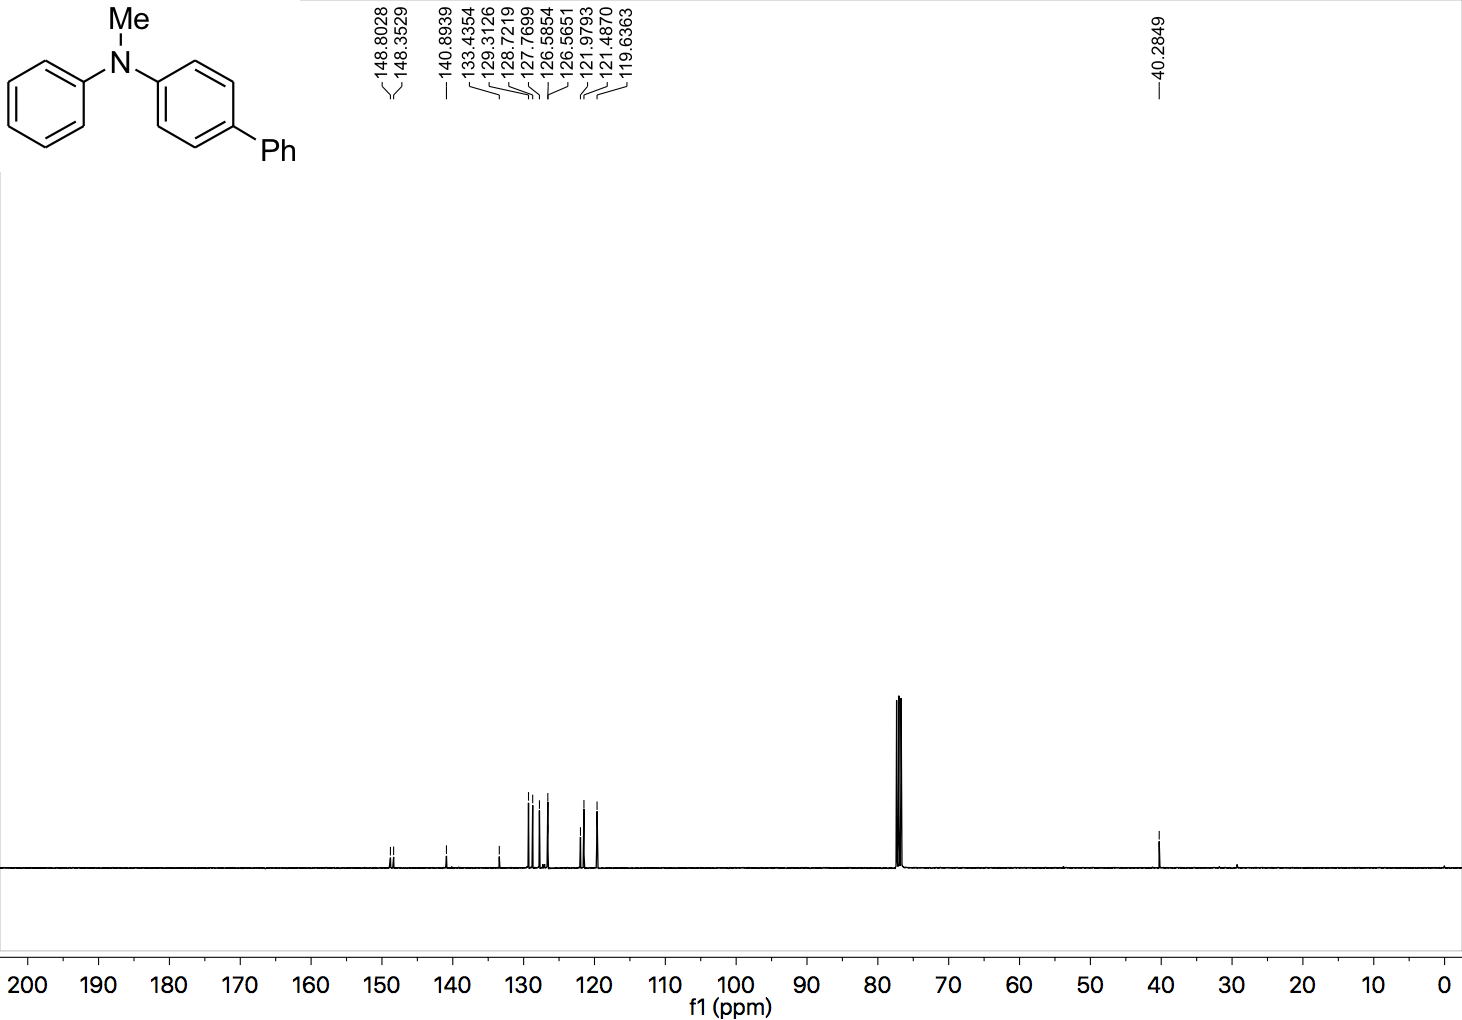


1H NMR (400 MHz, CDCl3) spectrum of **18**.


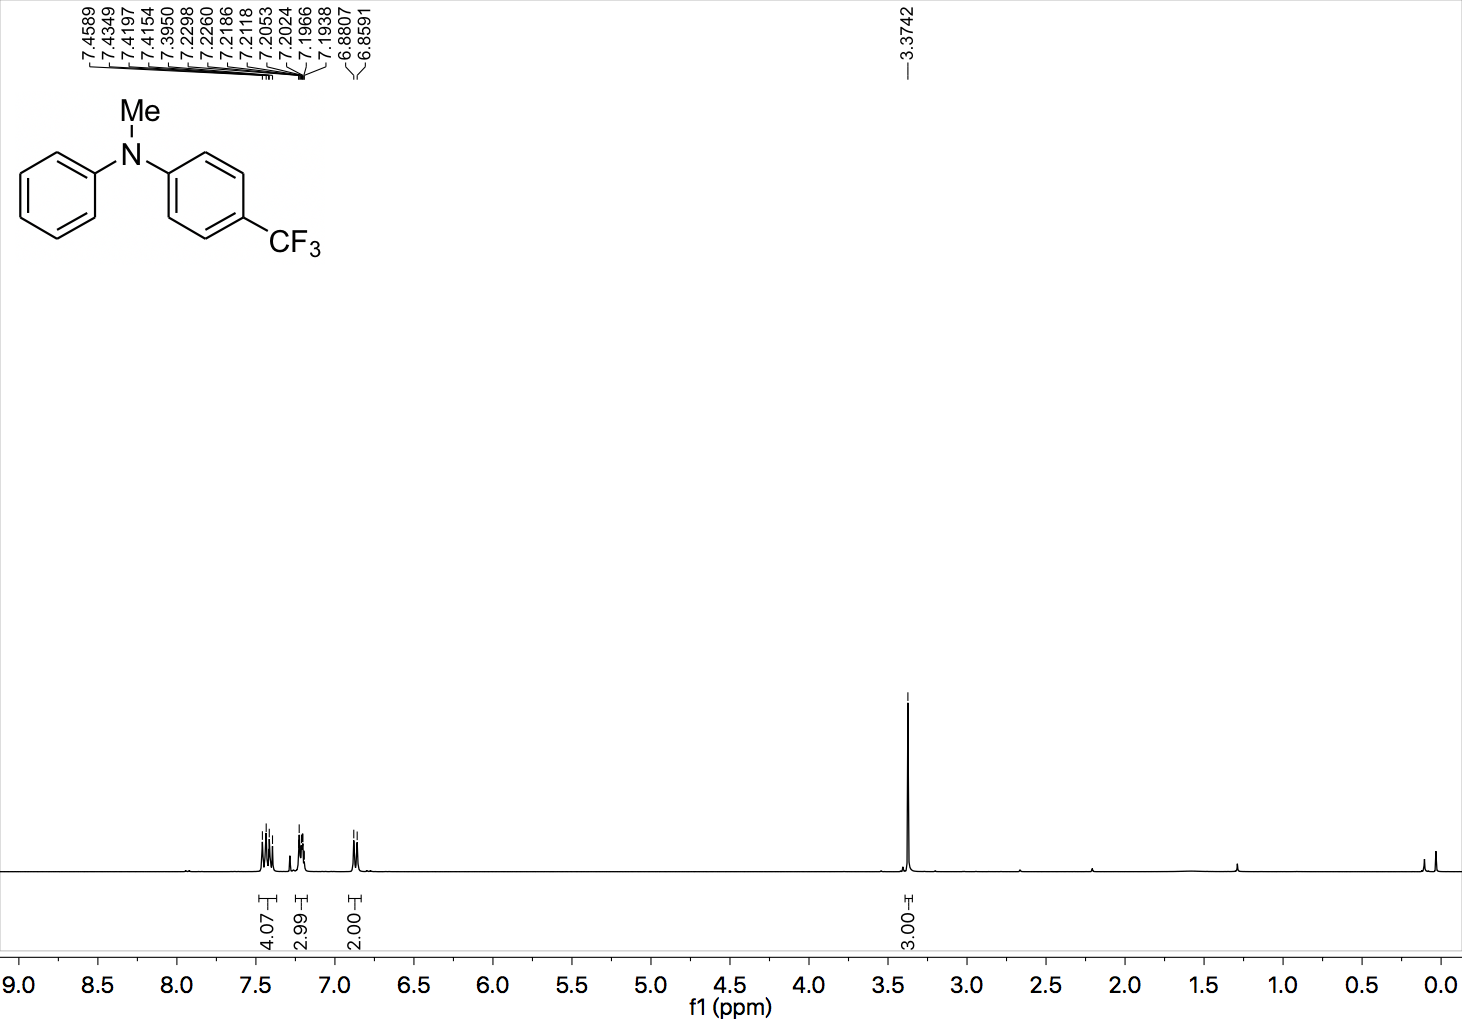


13C NMR (101 MHz, CDCl3) spectrum of **18**.


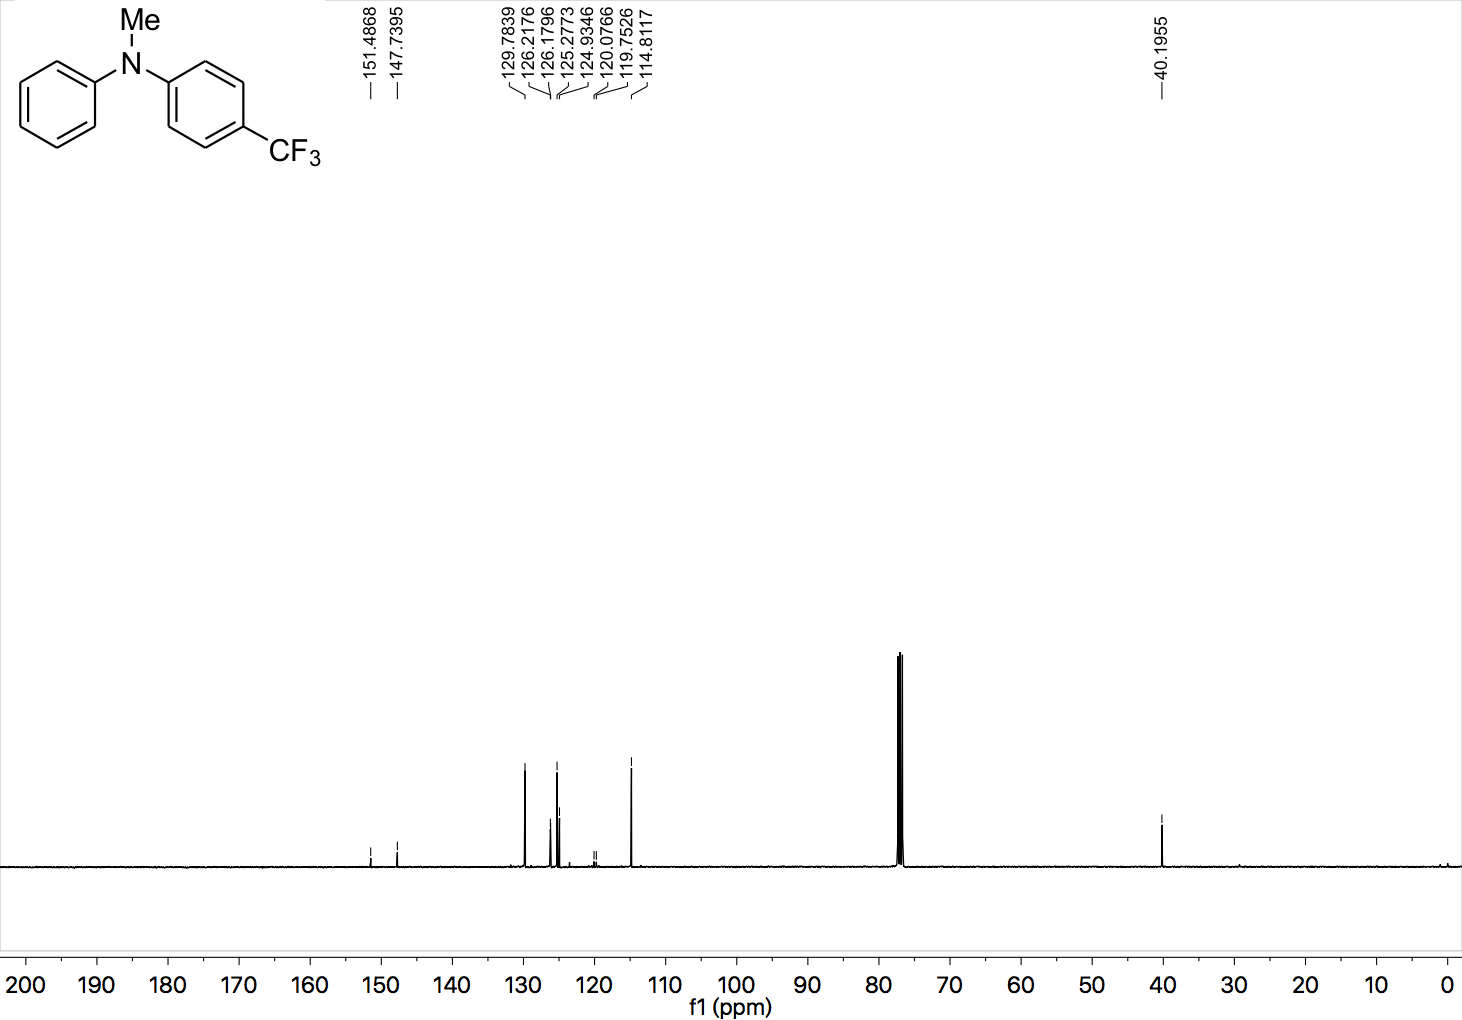


19F NMR (377 MHz, CDCl3) spectrum of **18**.


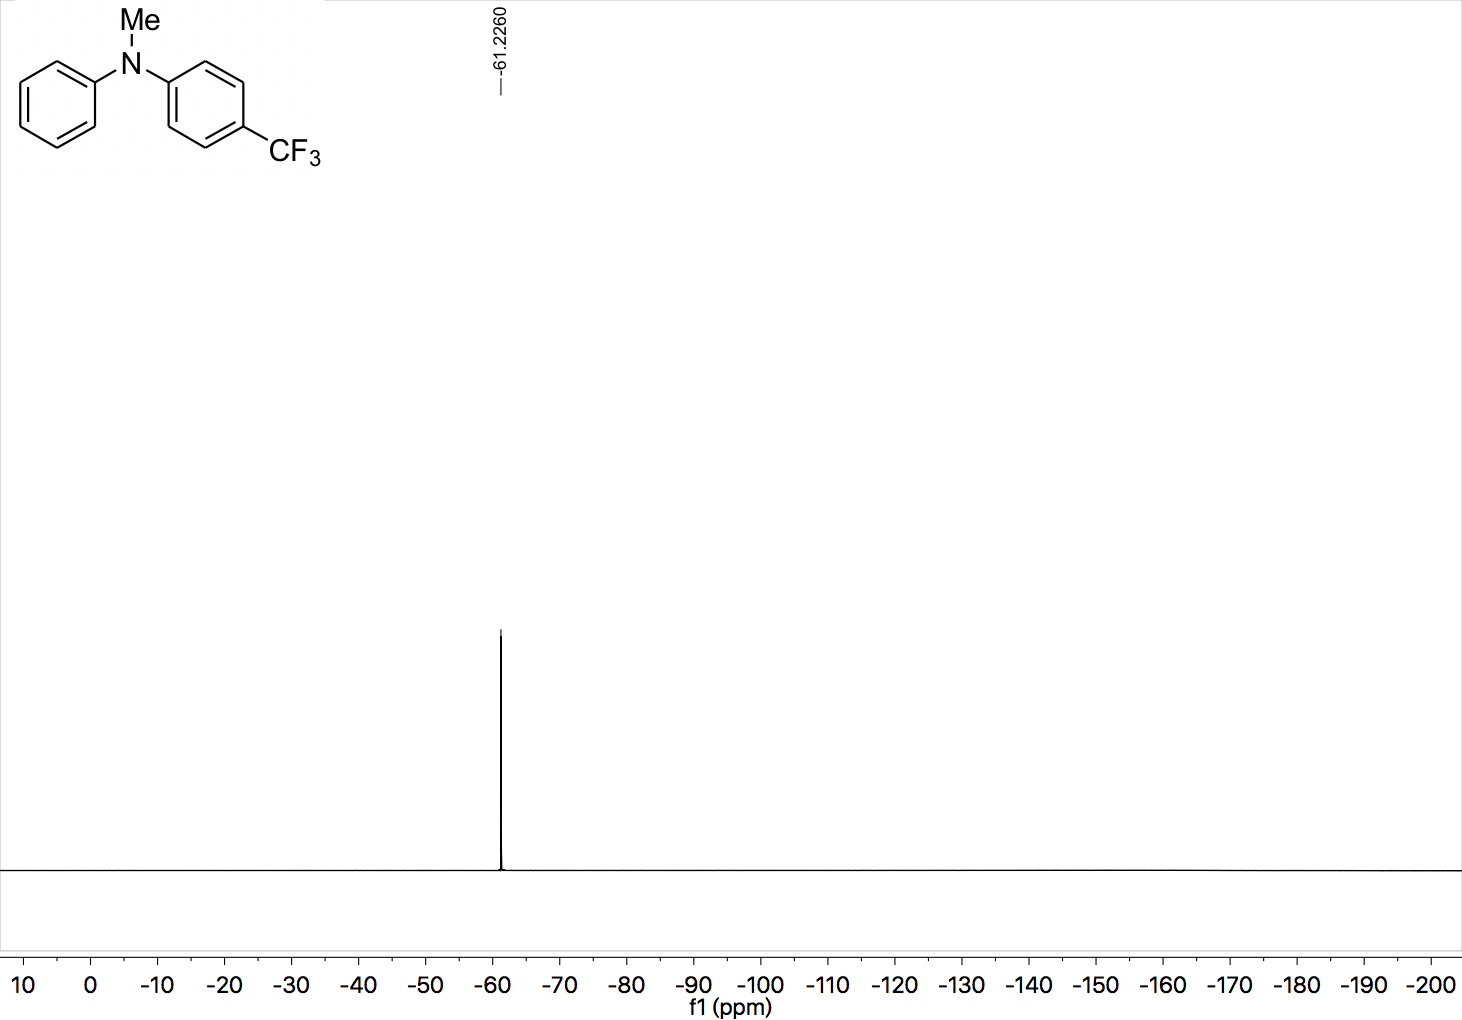


1H NMR (400 MHz, CDCl3) spectrum of **19**.


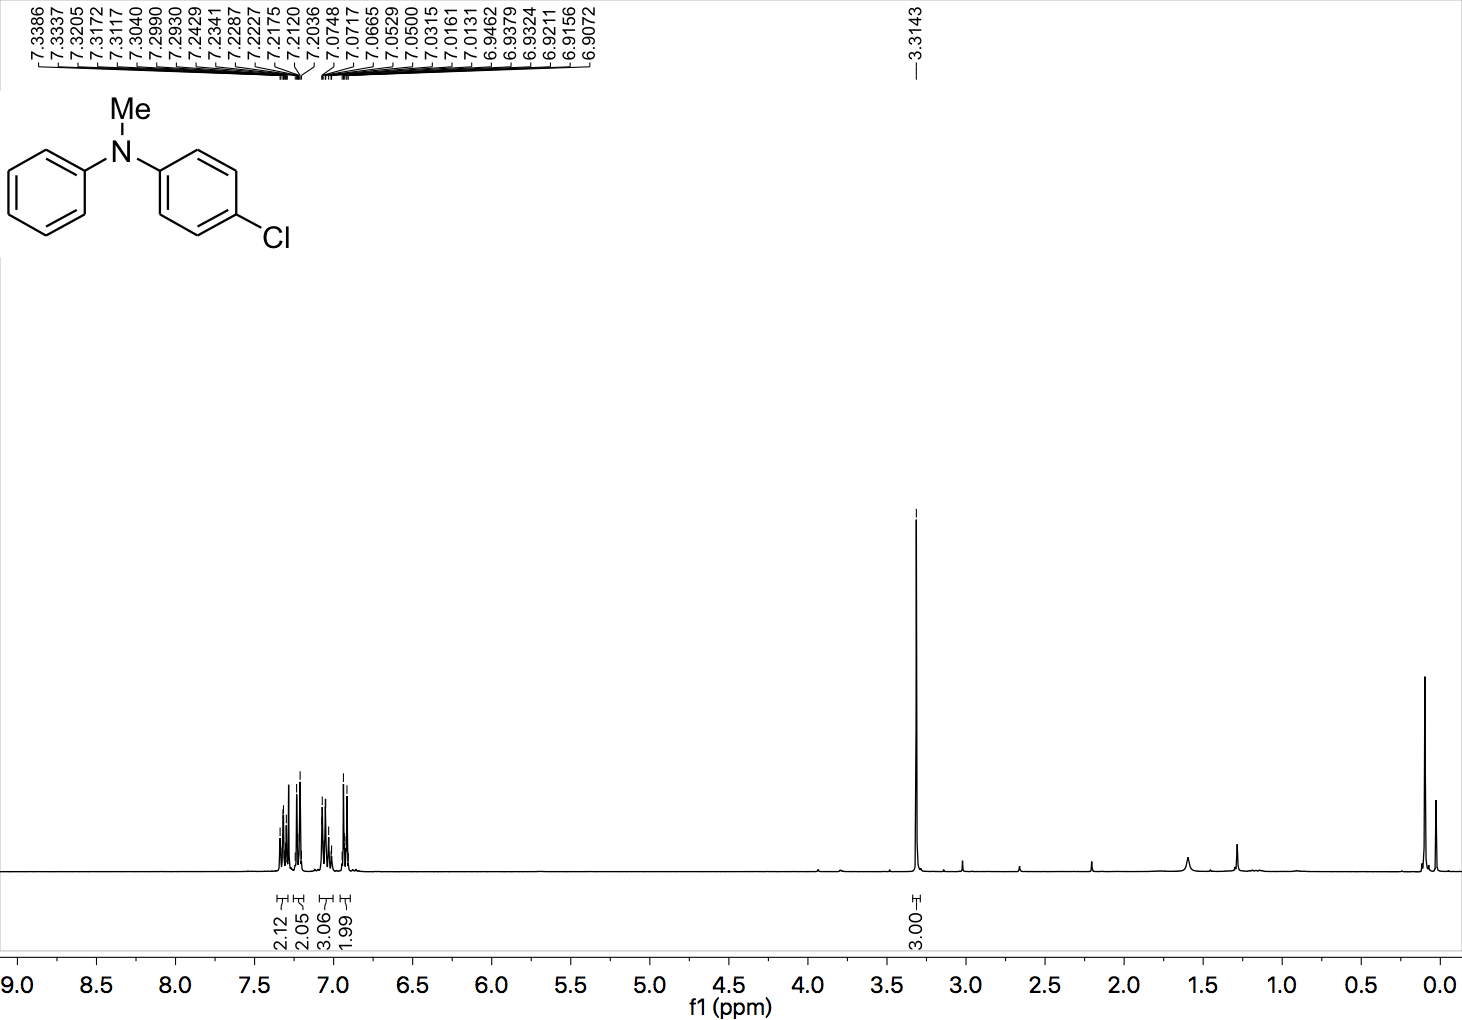


13C NMR (101 MHz, CDCl3) spectrum of **19**.


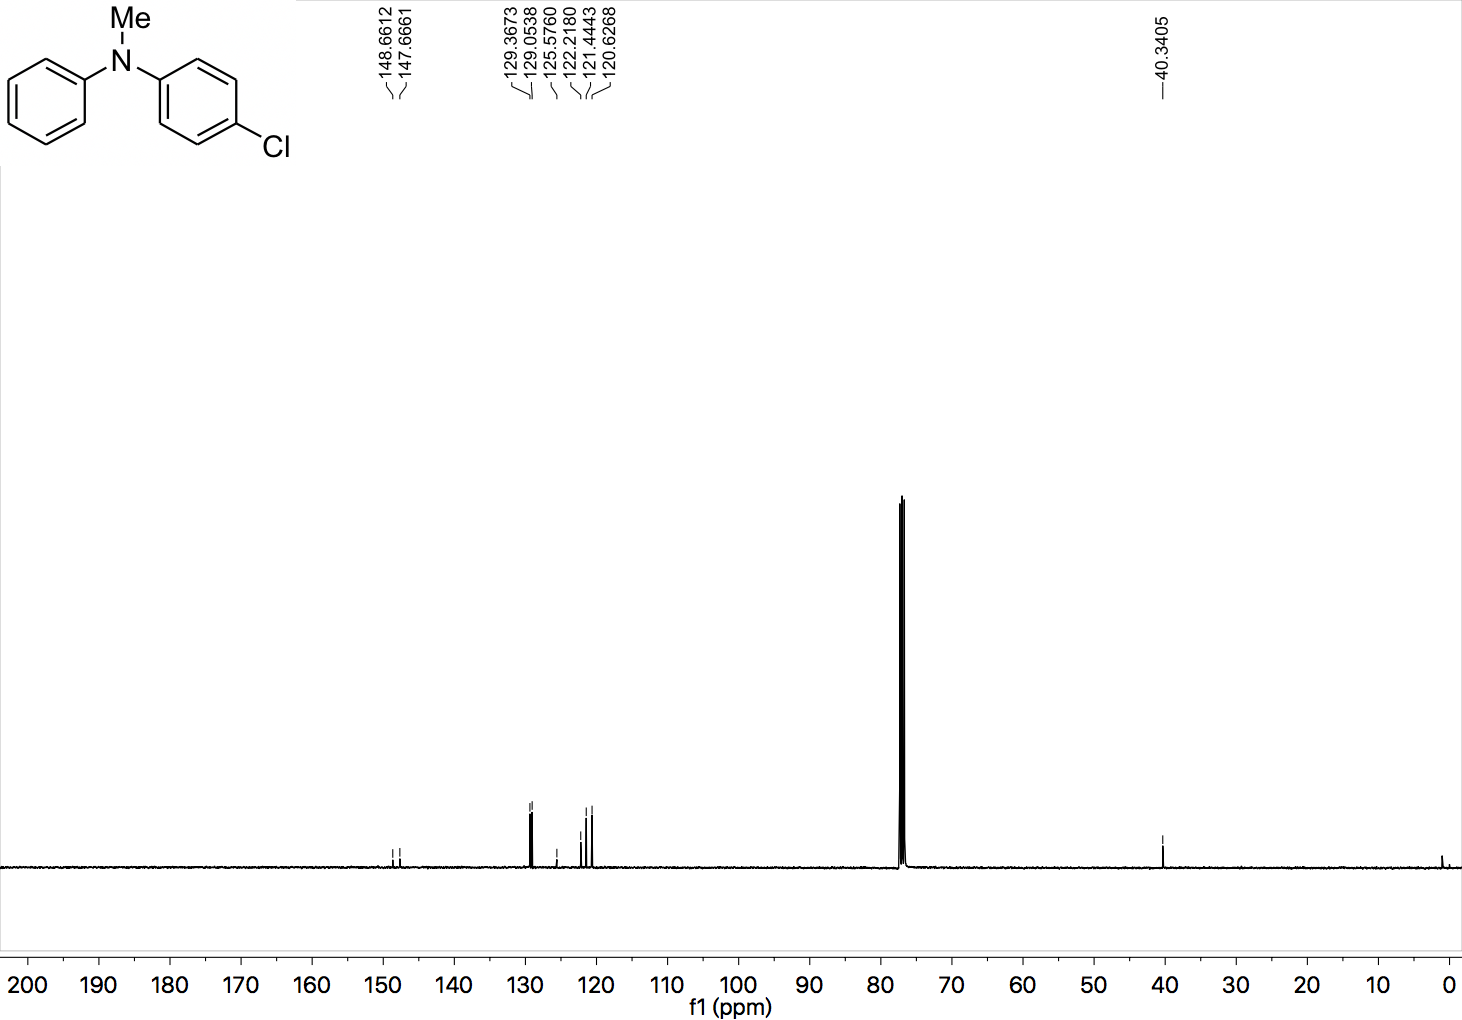


1H NMR (400 MHz, CDCl3) spectrum of **20**.


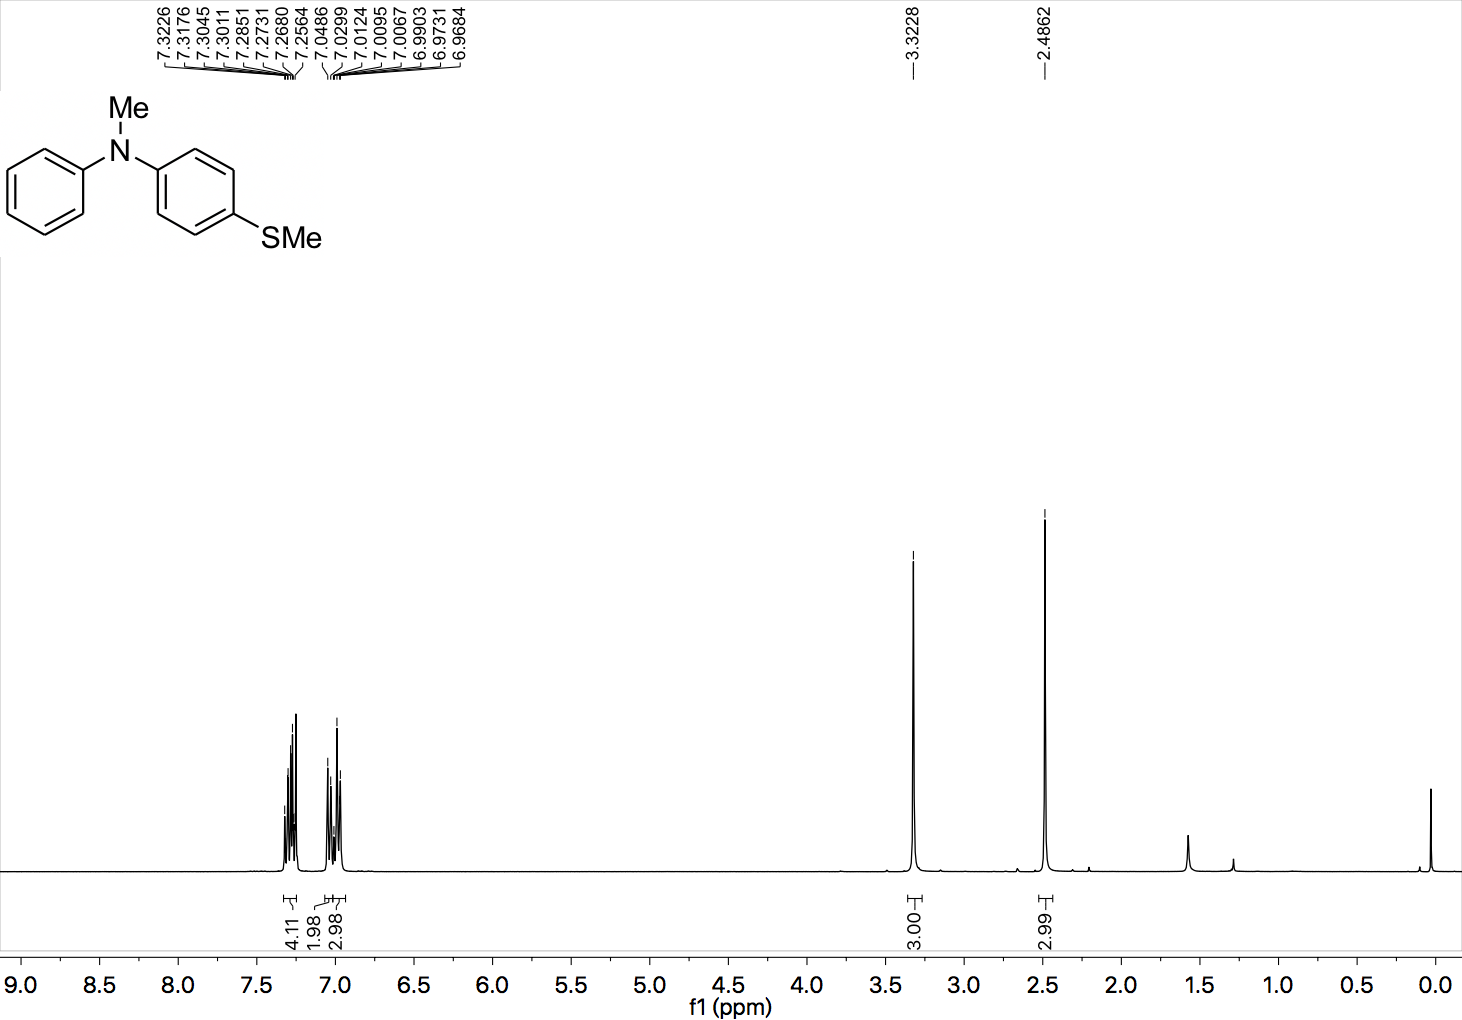


13C NMR (101 MHz, CDCl3) spectrum of **20**.


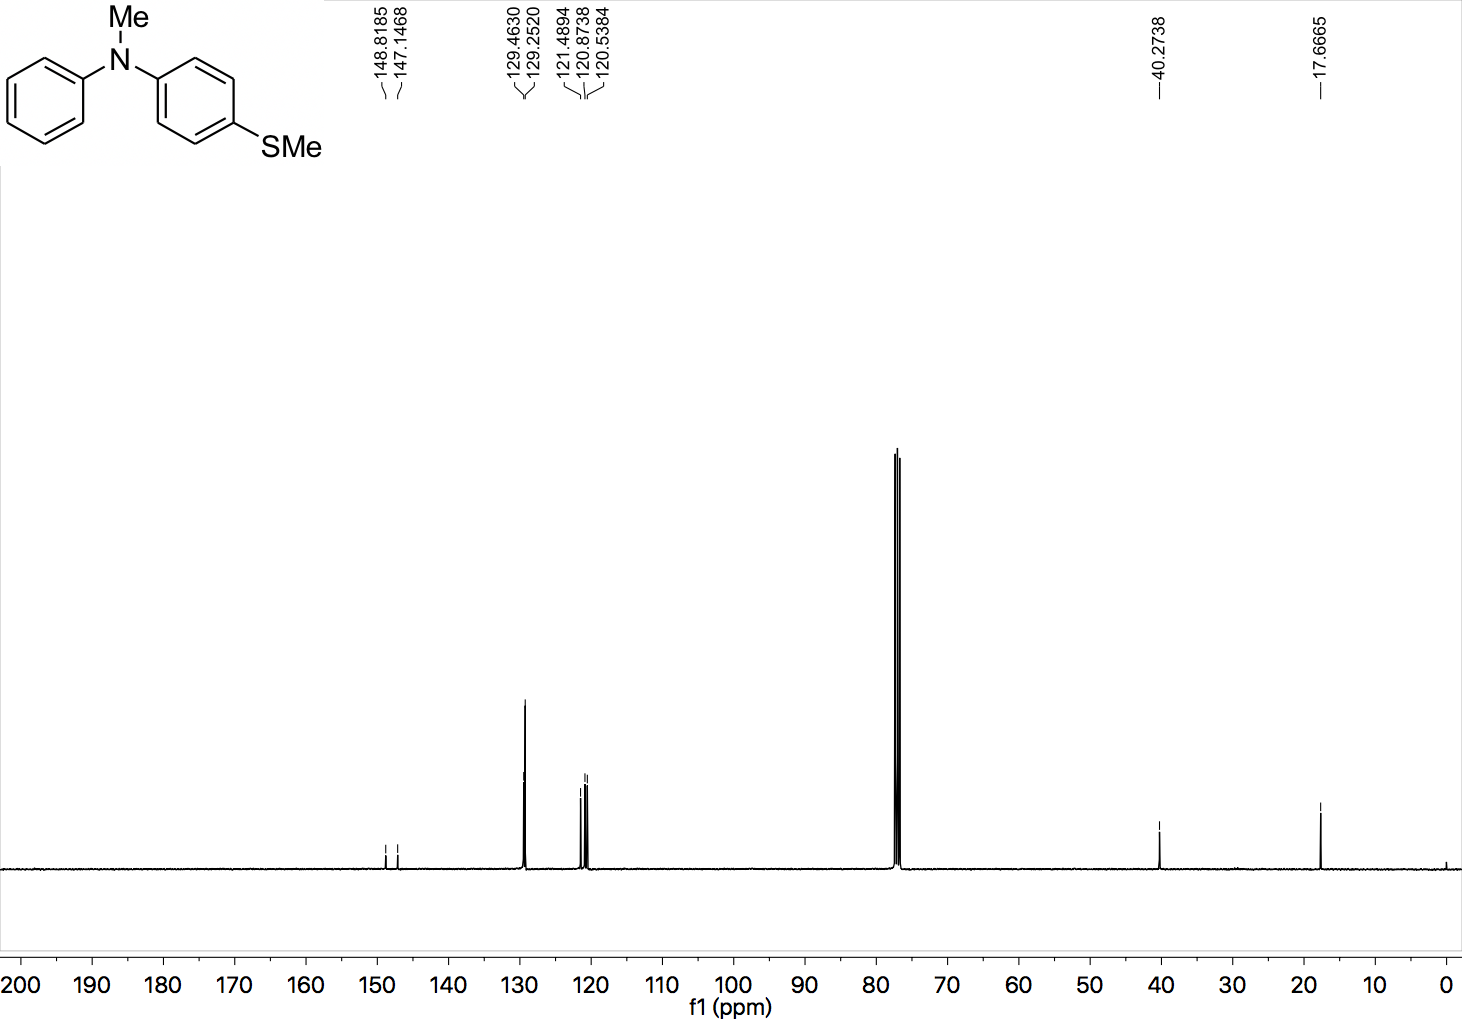


1H NMR (400 MHz, CDCl3) spectrum of **21**.


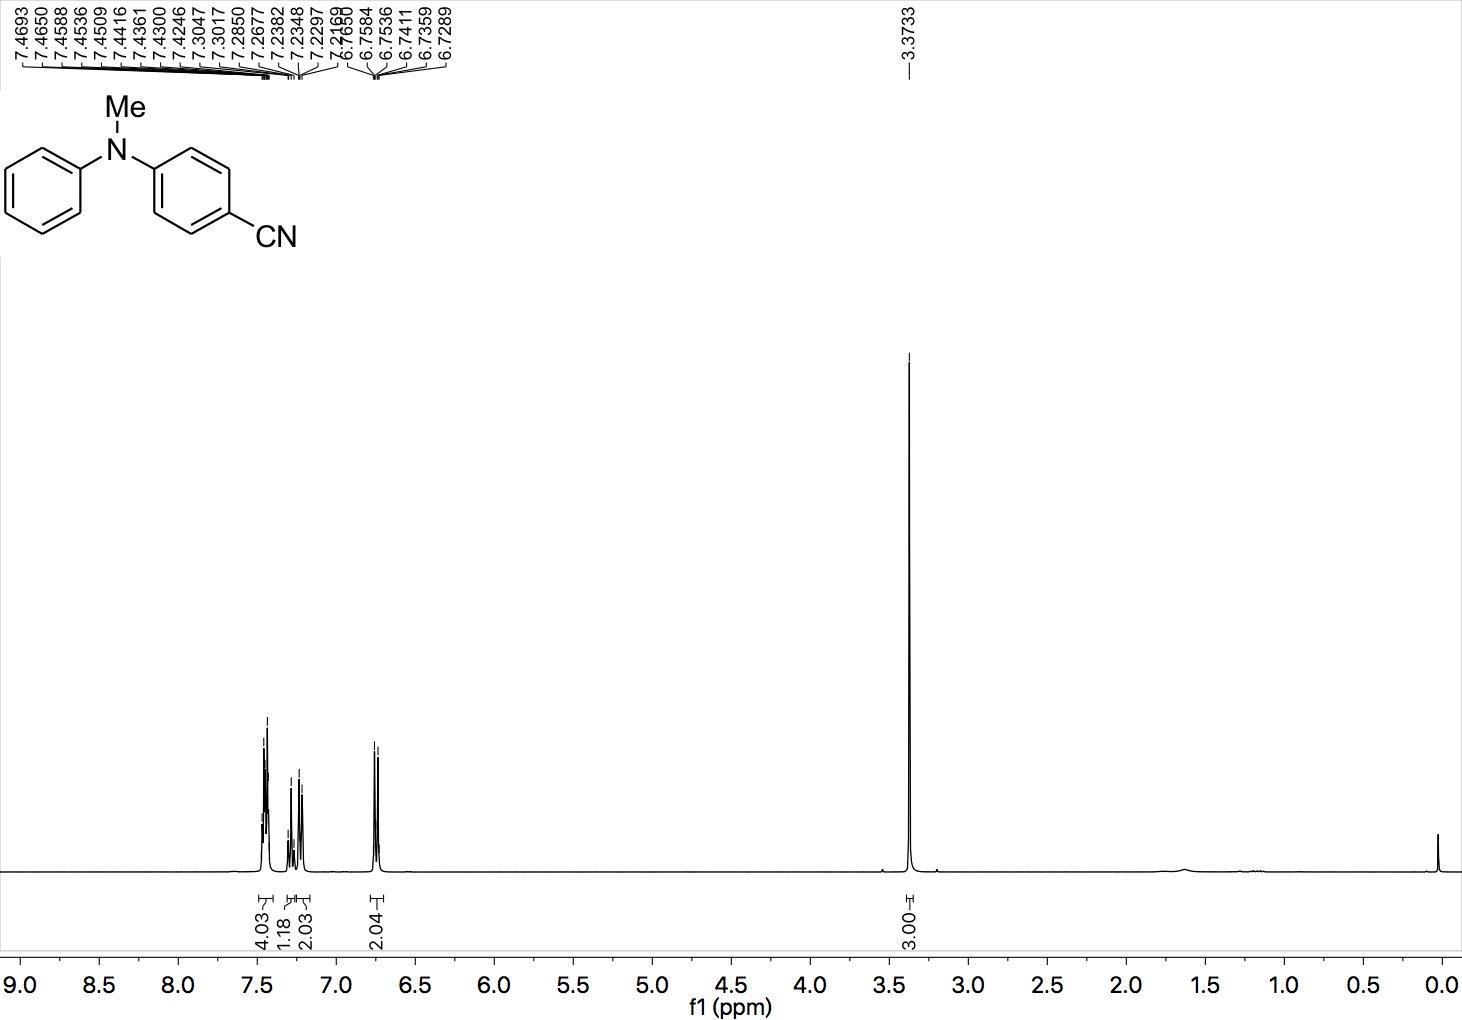


13C NMR (101 MHz, CDCl3) spectrum of **21**.


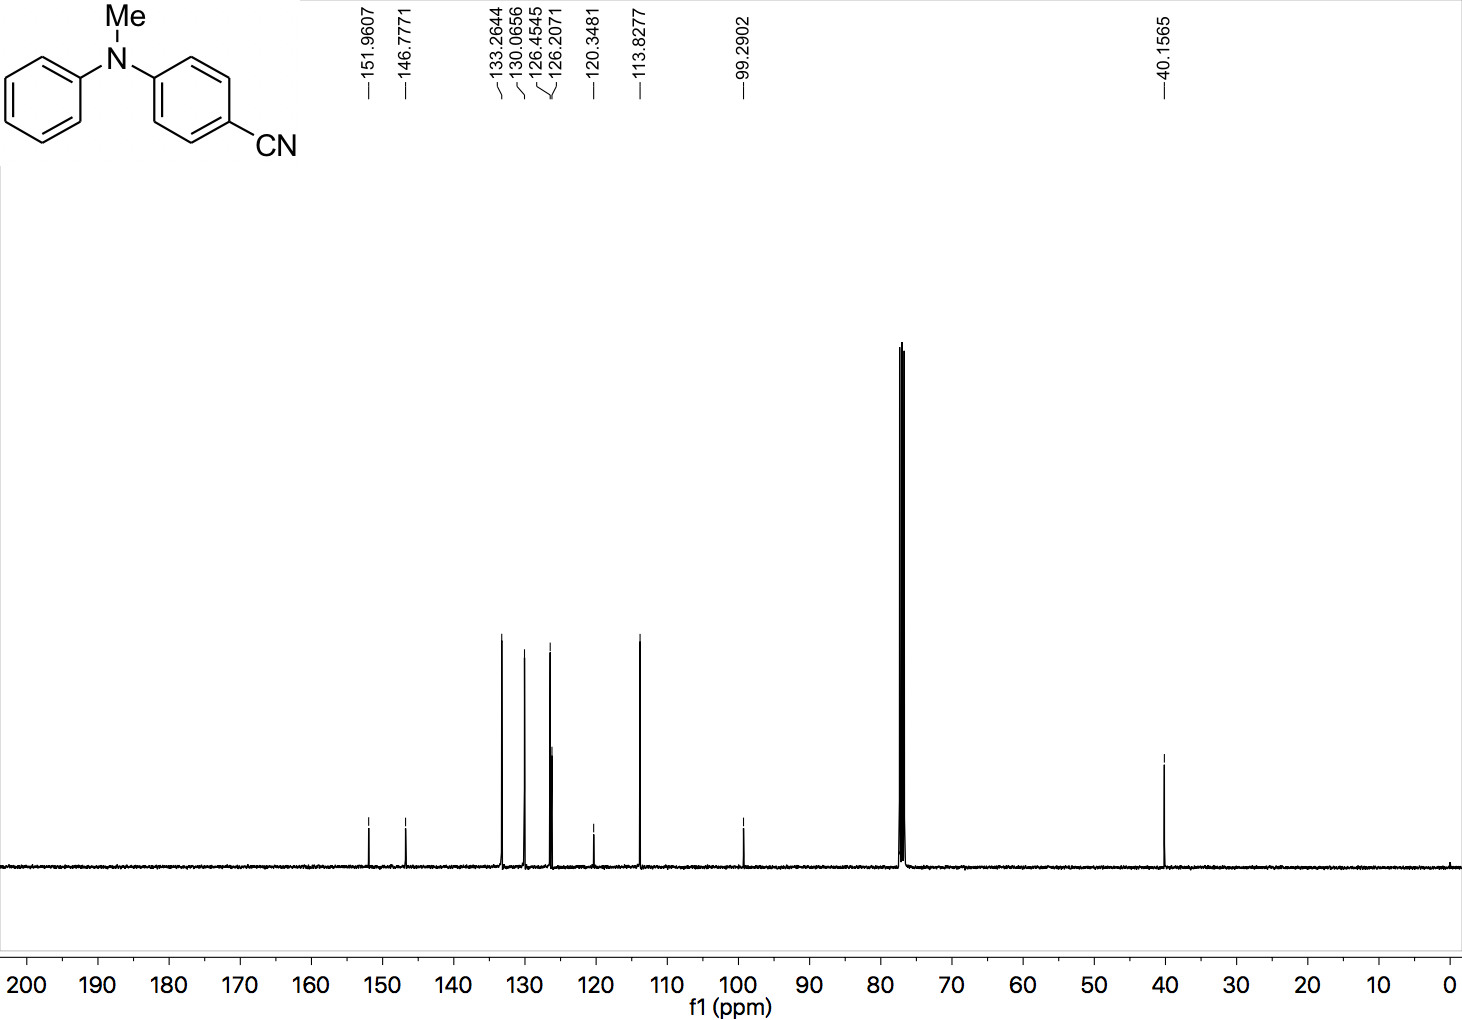


1H NMR (400 MHz, CDCl3) spectrum of **22**.


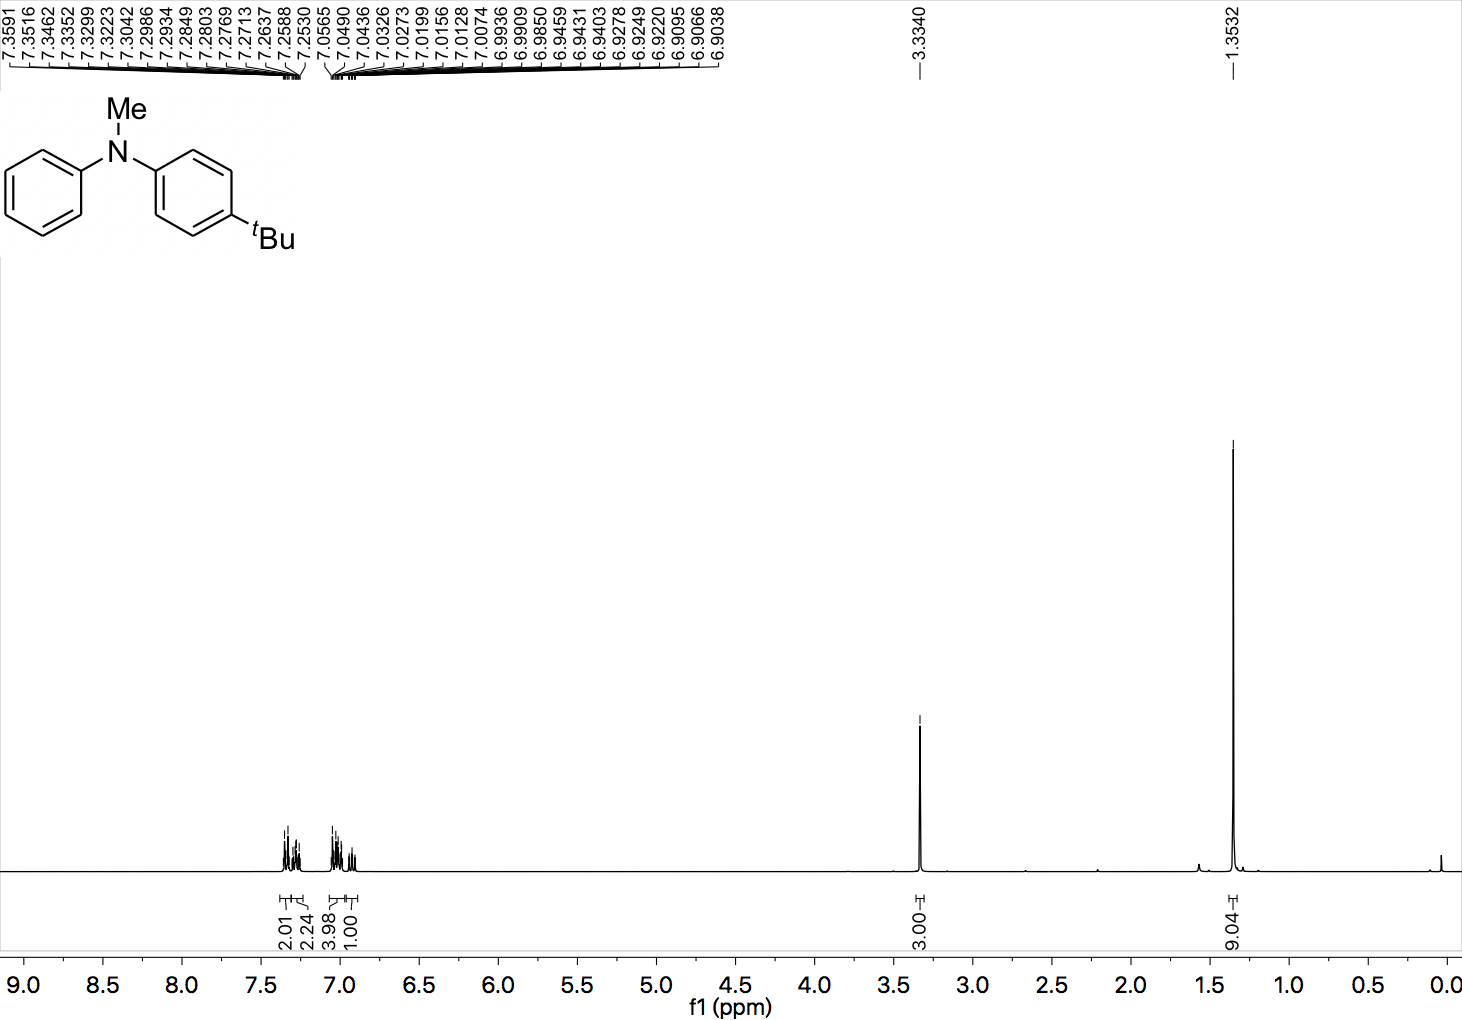


13C NMR (101 MHz, CDCl3) spectrum of **22**.


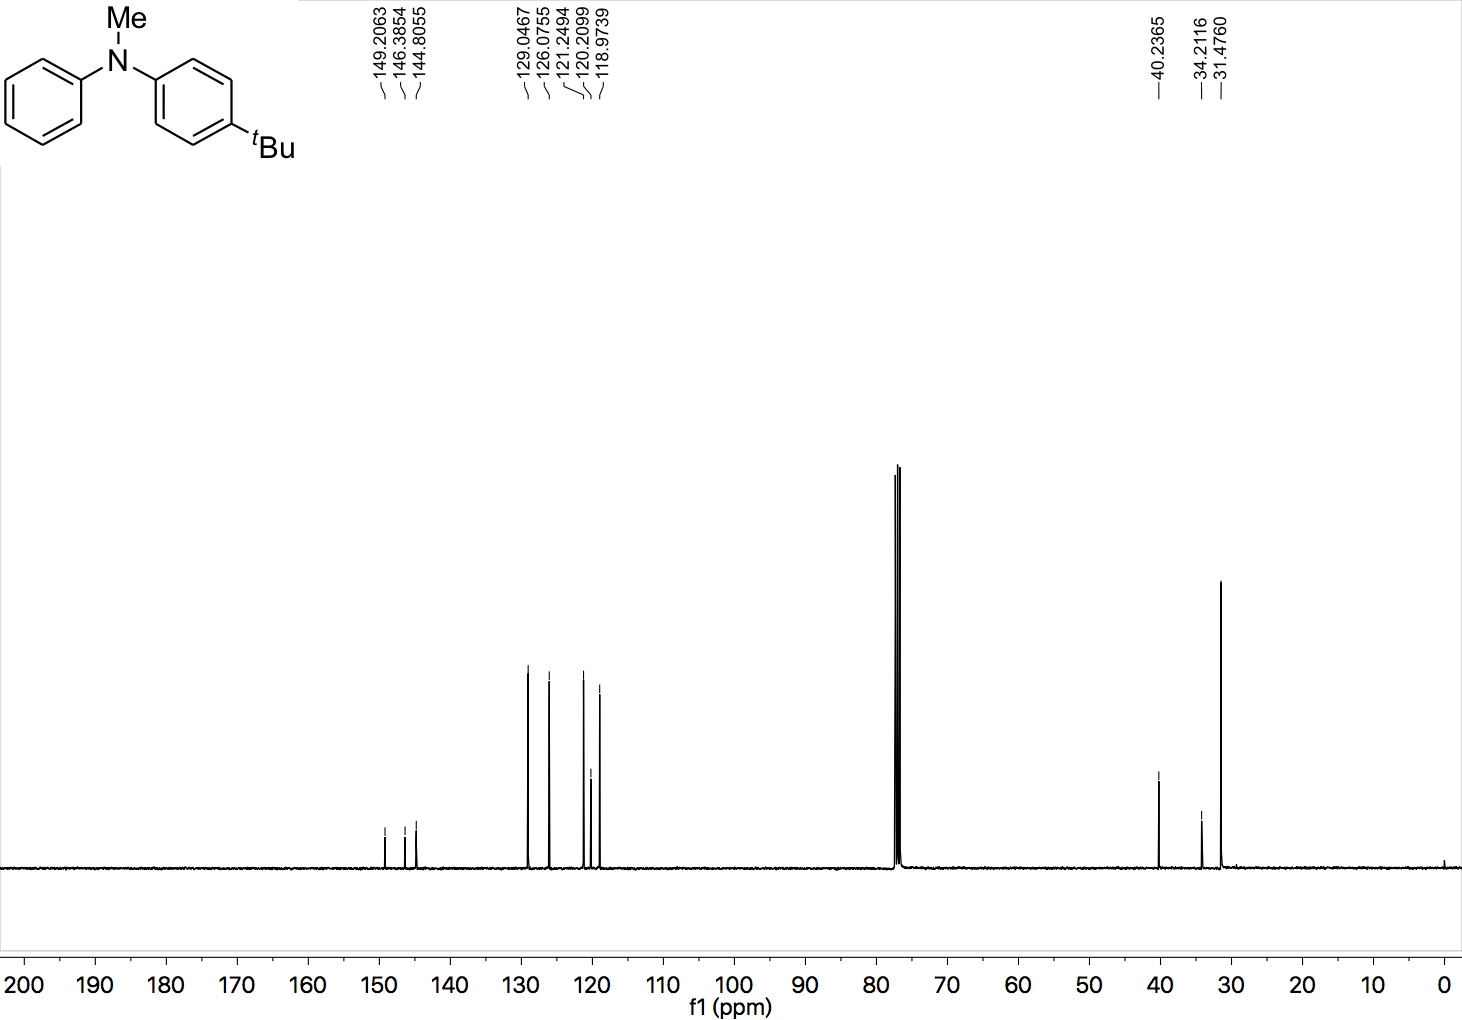


1H NMR (400 MHz, CDCl3) spectrum of **23**.


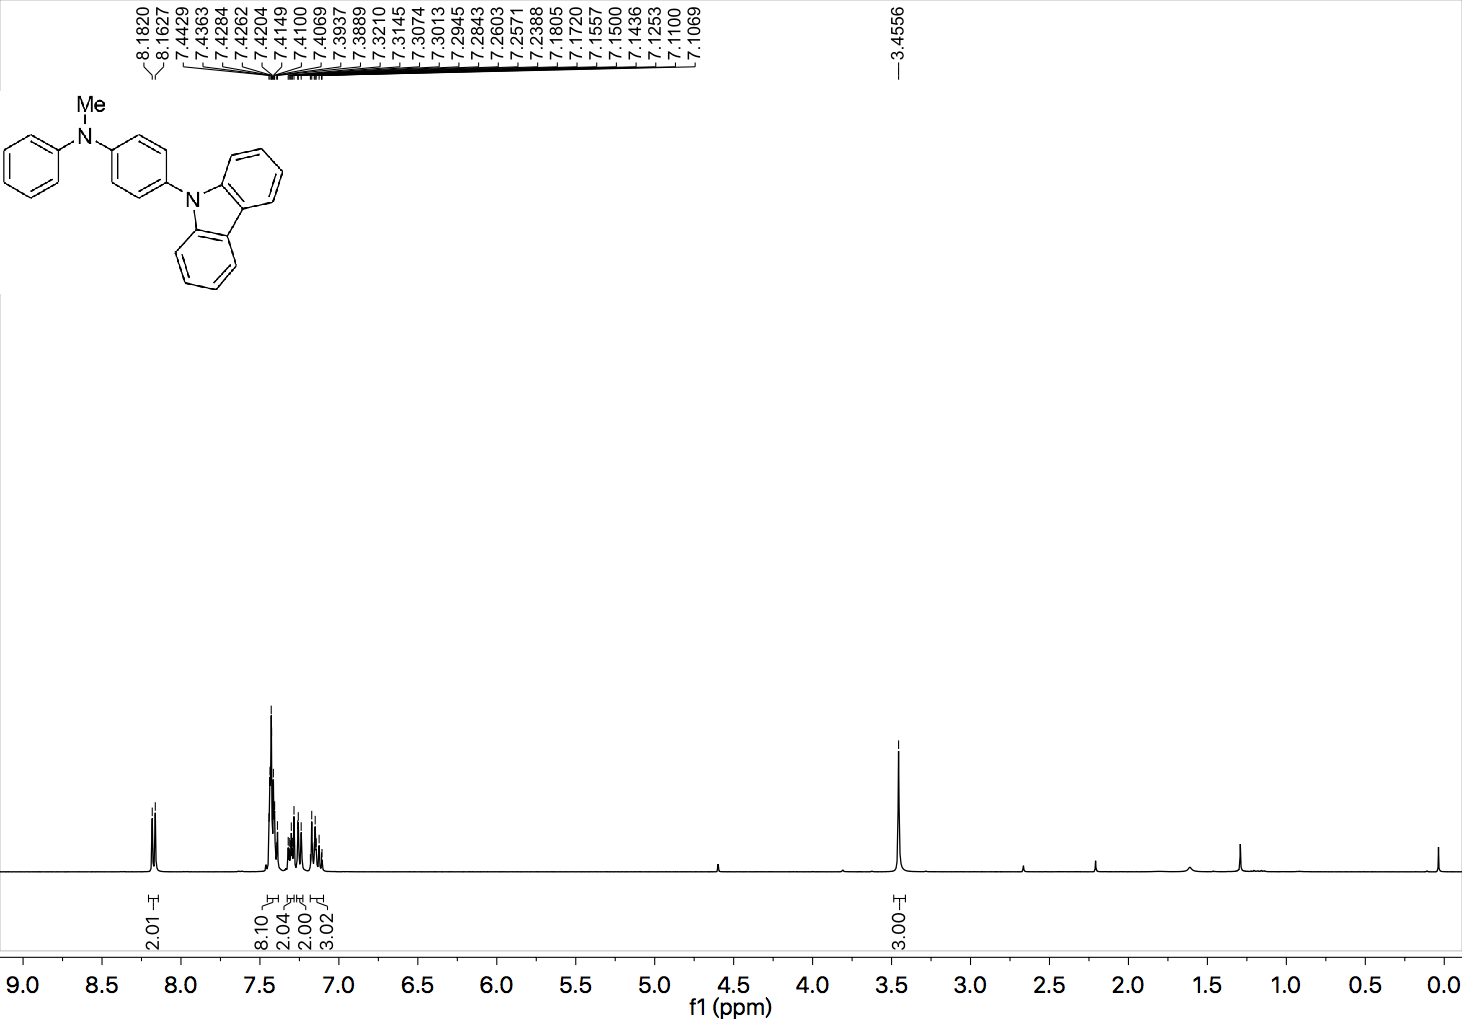


13C NMR (101 MHz, CDCl3) spectrum of **23**.


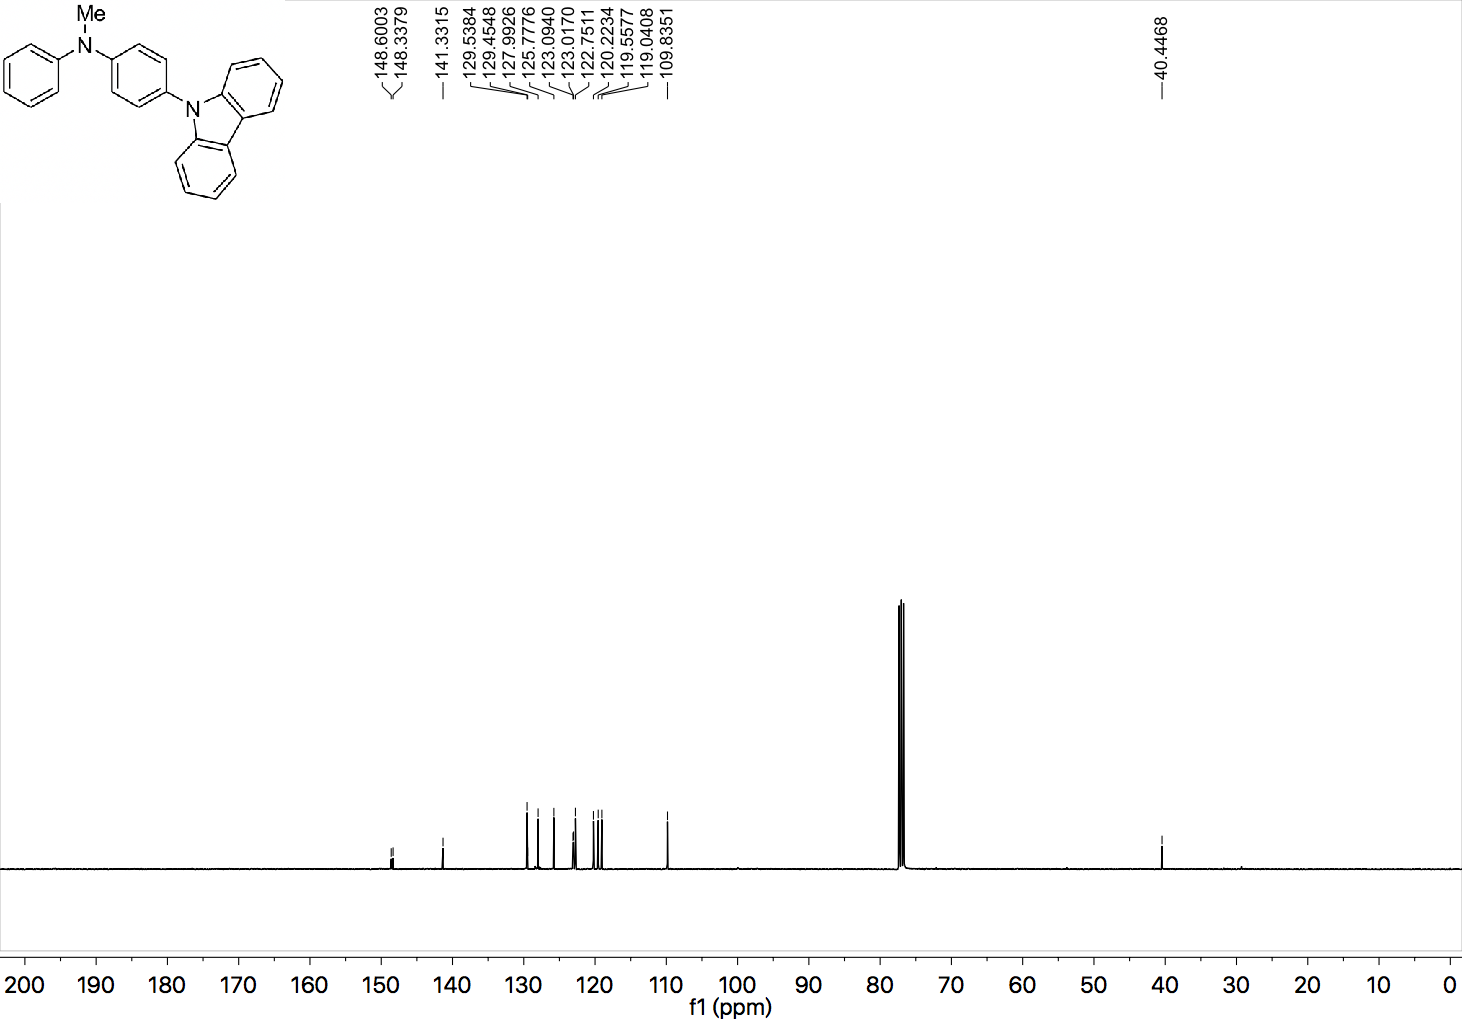


1H NMR (400 MHz, CDCl3) spectrum of **24**.


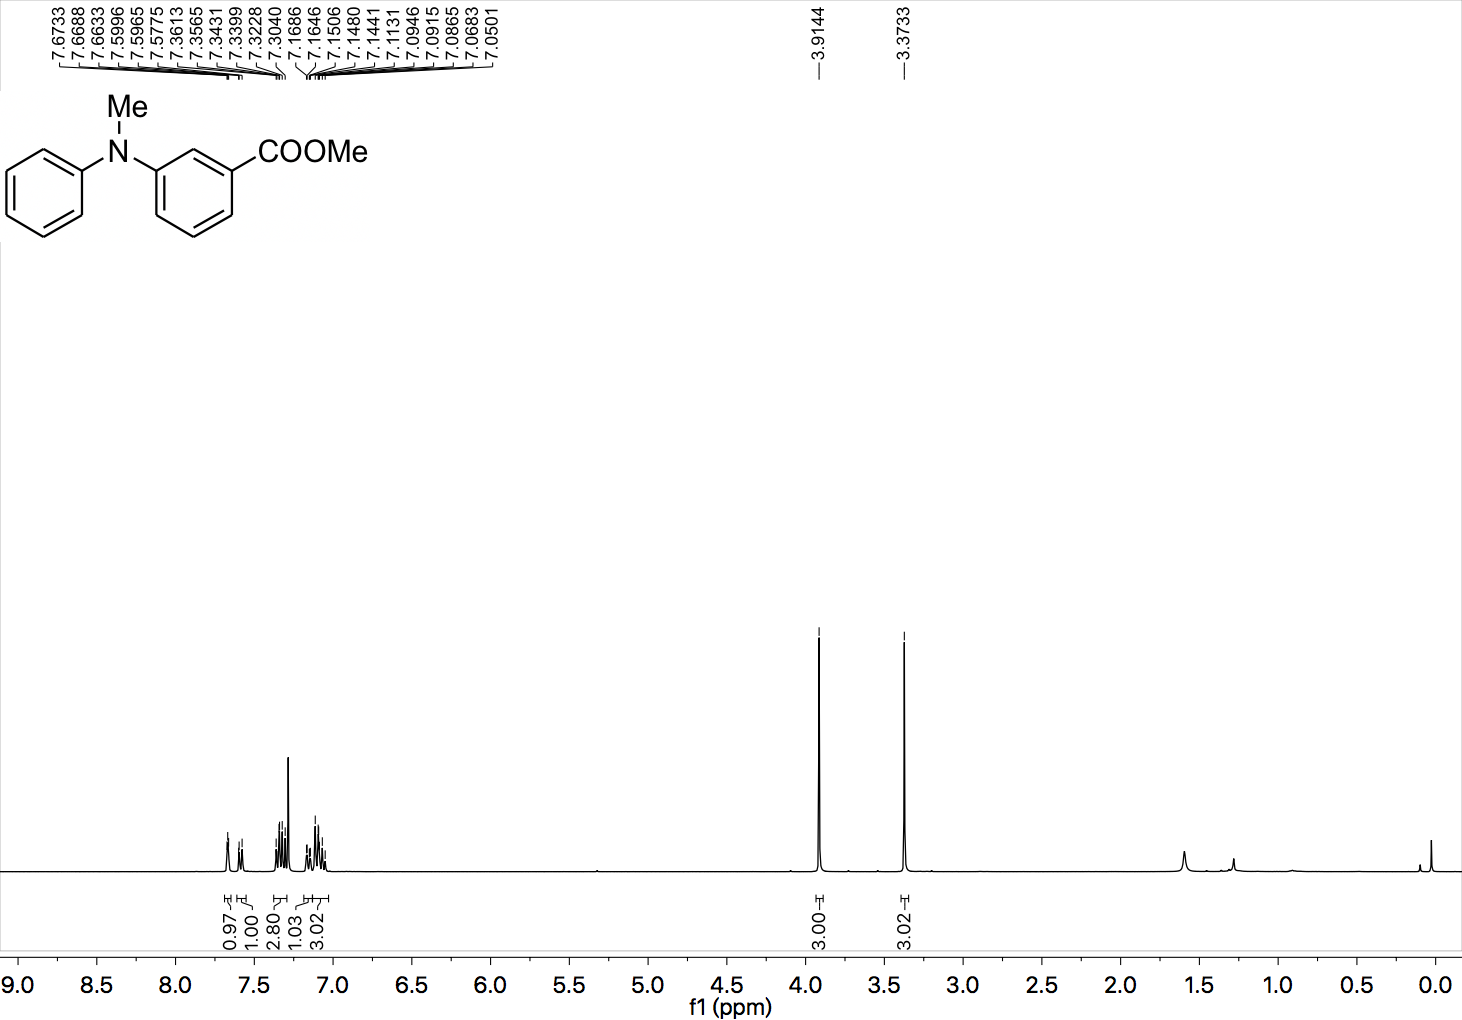


13C NMR (101 MHz, CDCl3) spectrum of **24**.


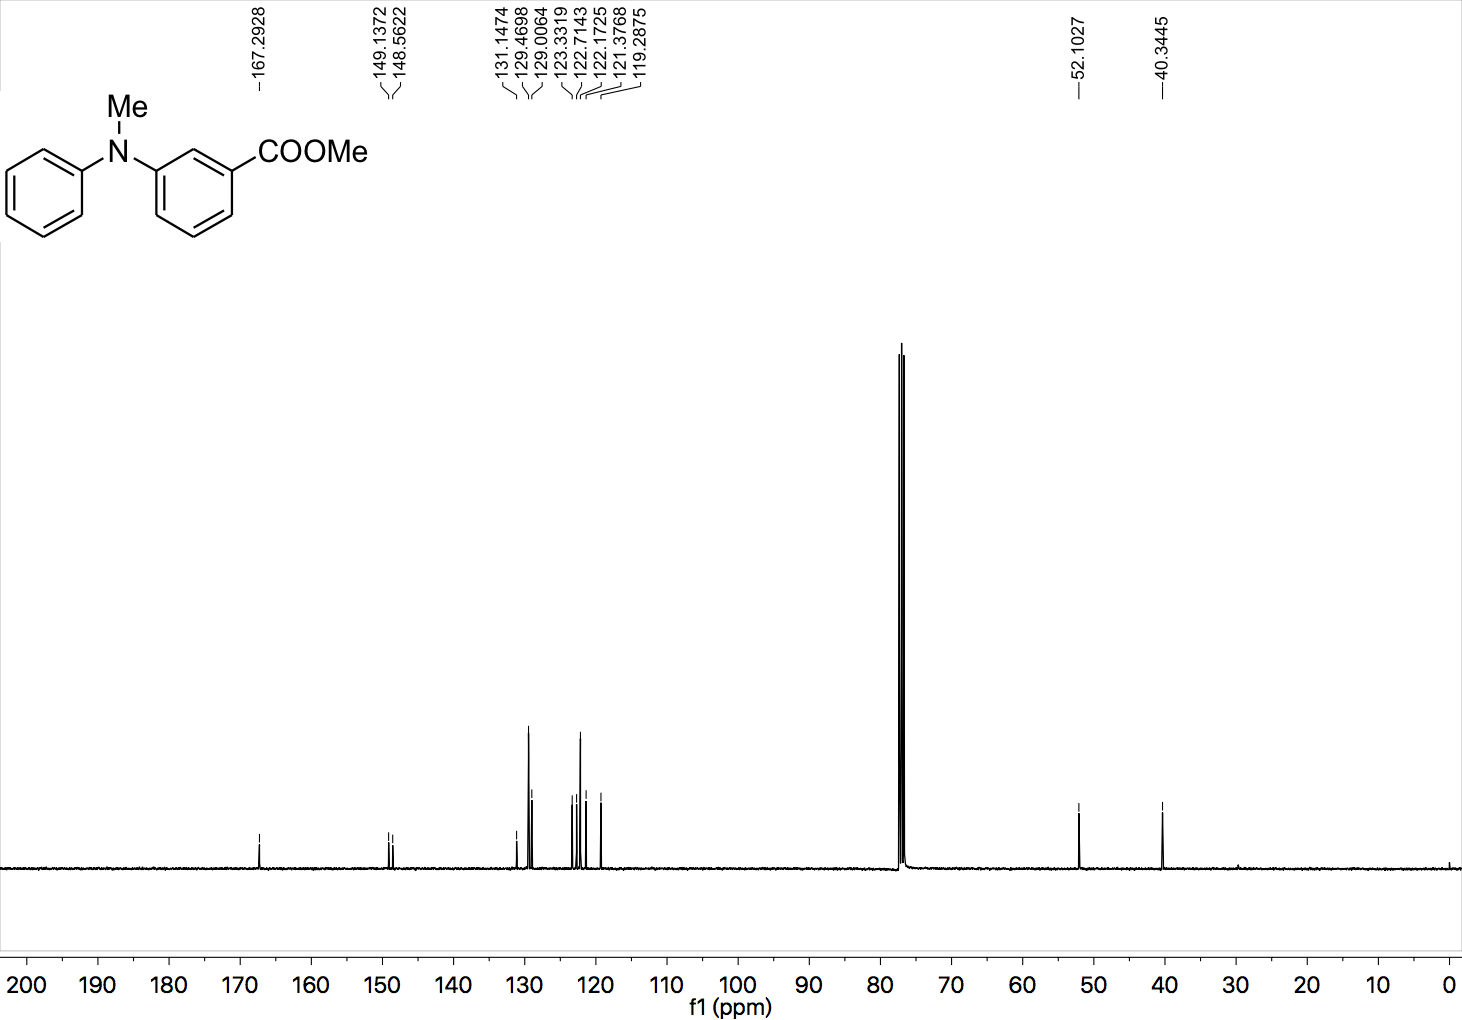


1H NMR (400 MHz, CDCl3) spectrum of **25**.


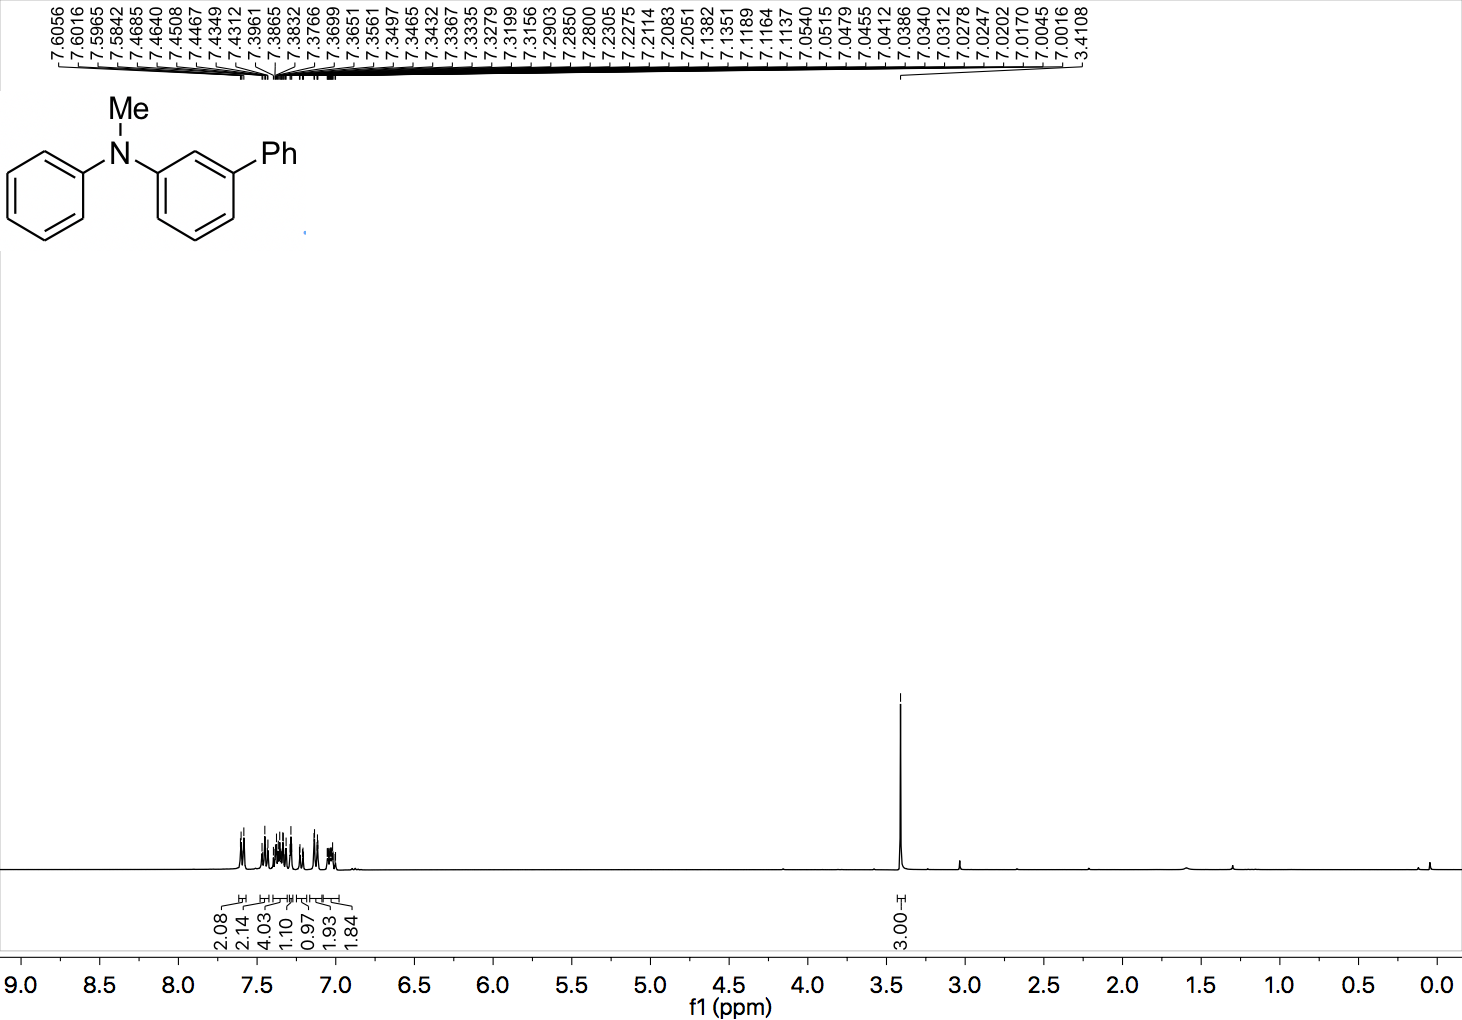


13C NMR (101 MHz, CDCl3) spectrum of **25**.


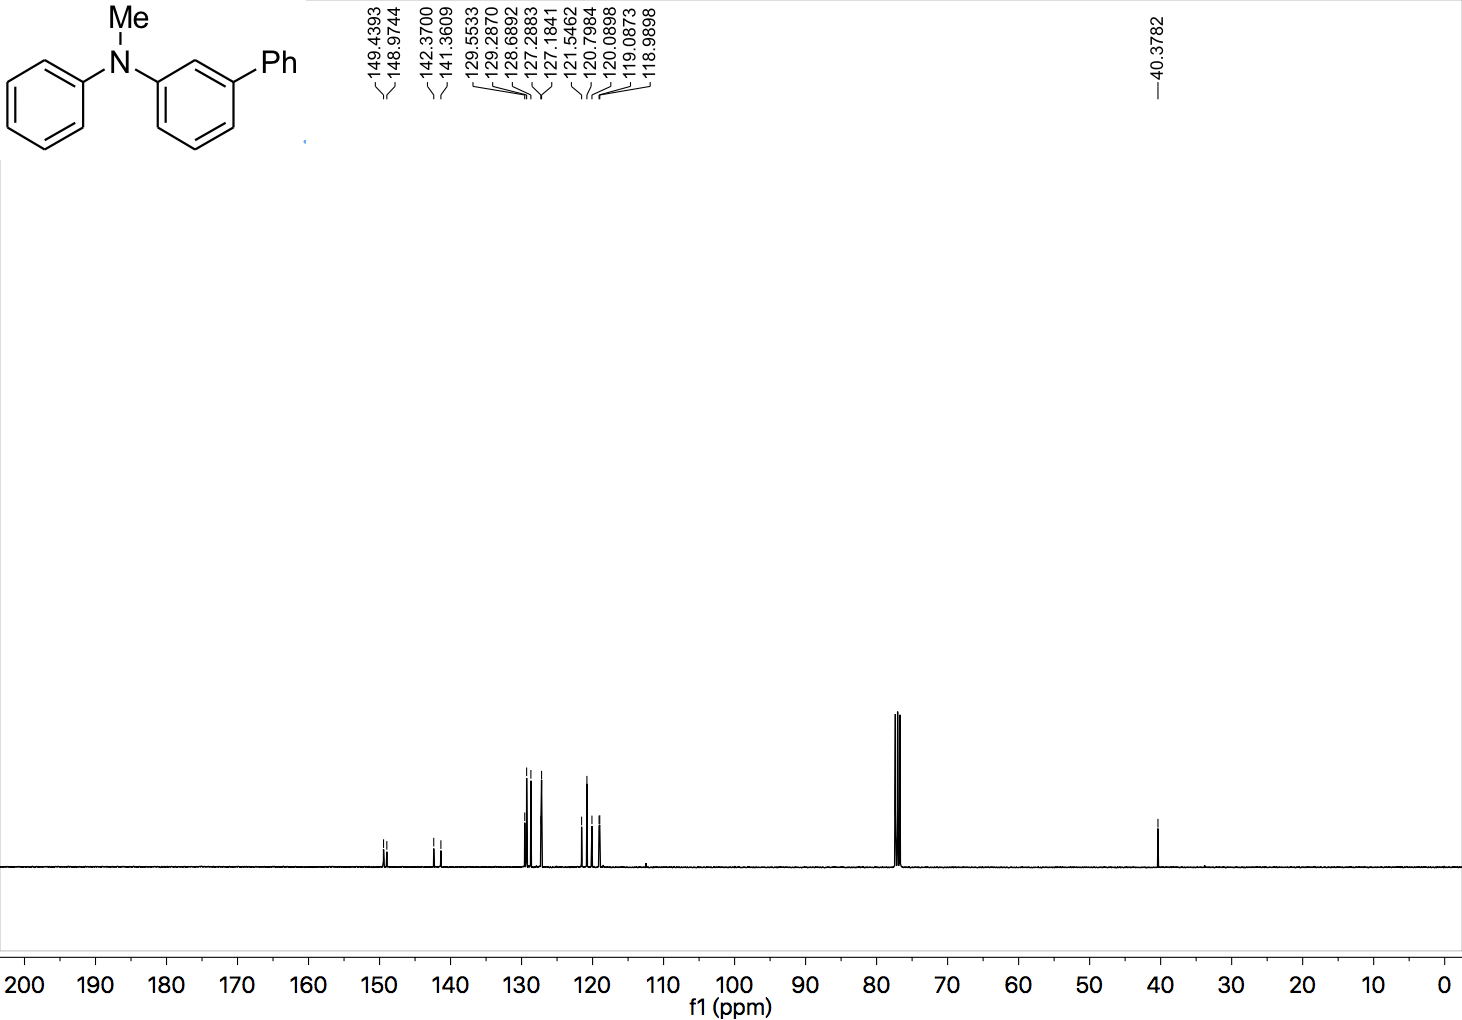


1H NMR (400 MHz, CDCl3) spectrum of **26**.


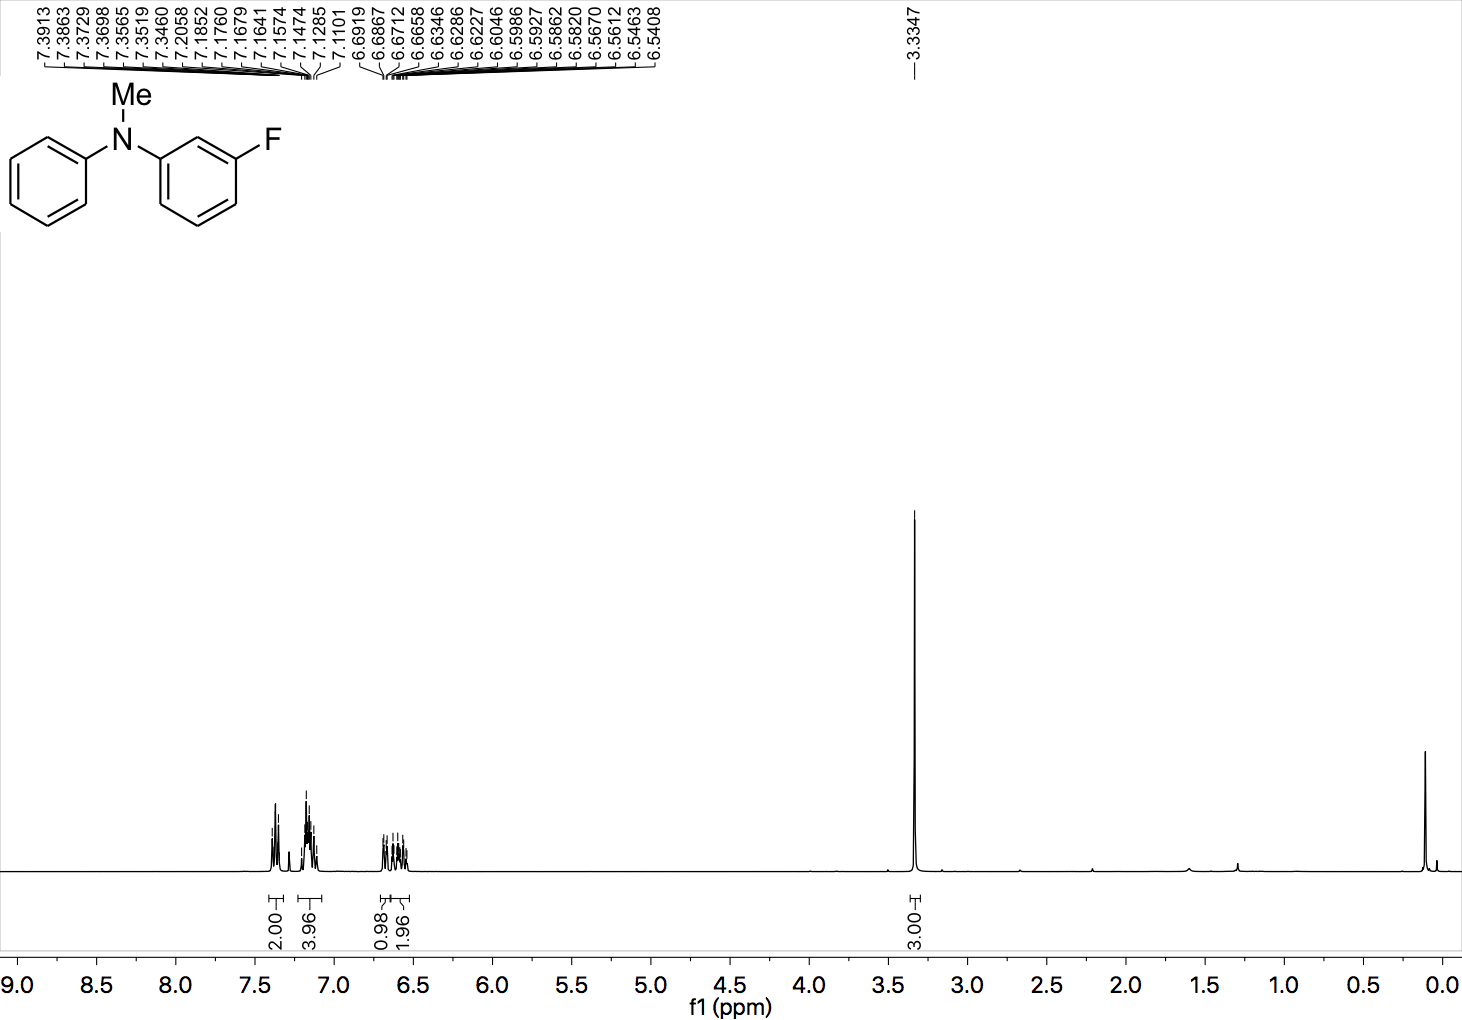


13C NMR (101 MHz, CDCl3) spectrum of **26**.


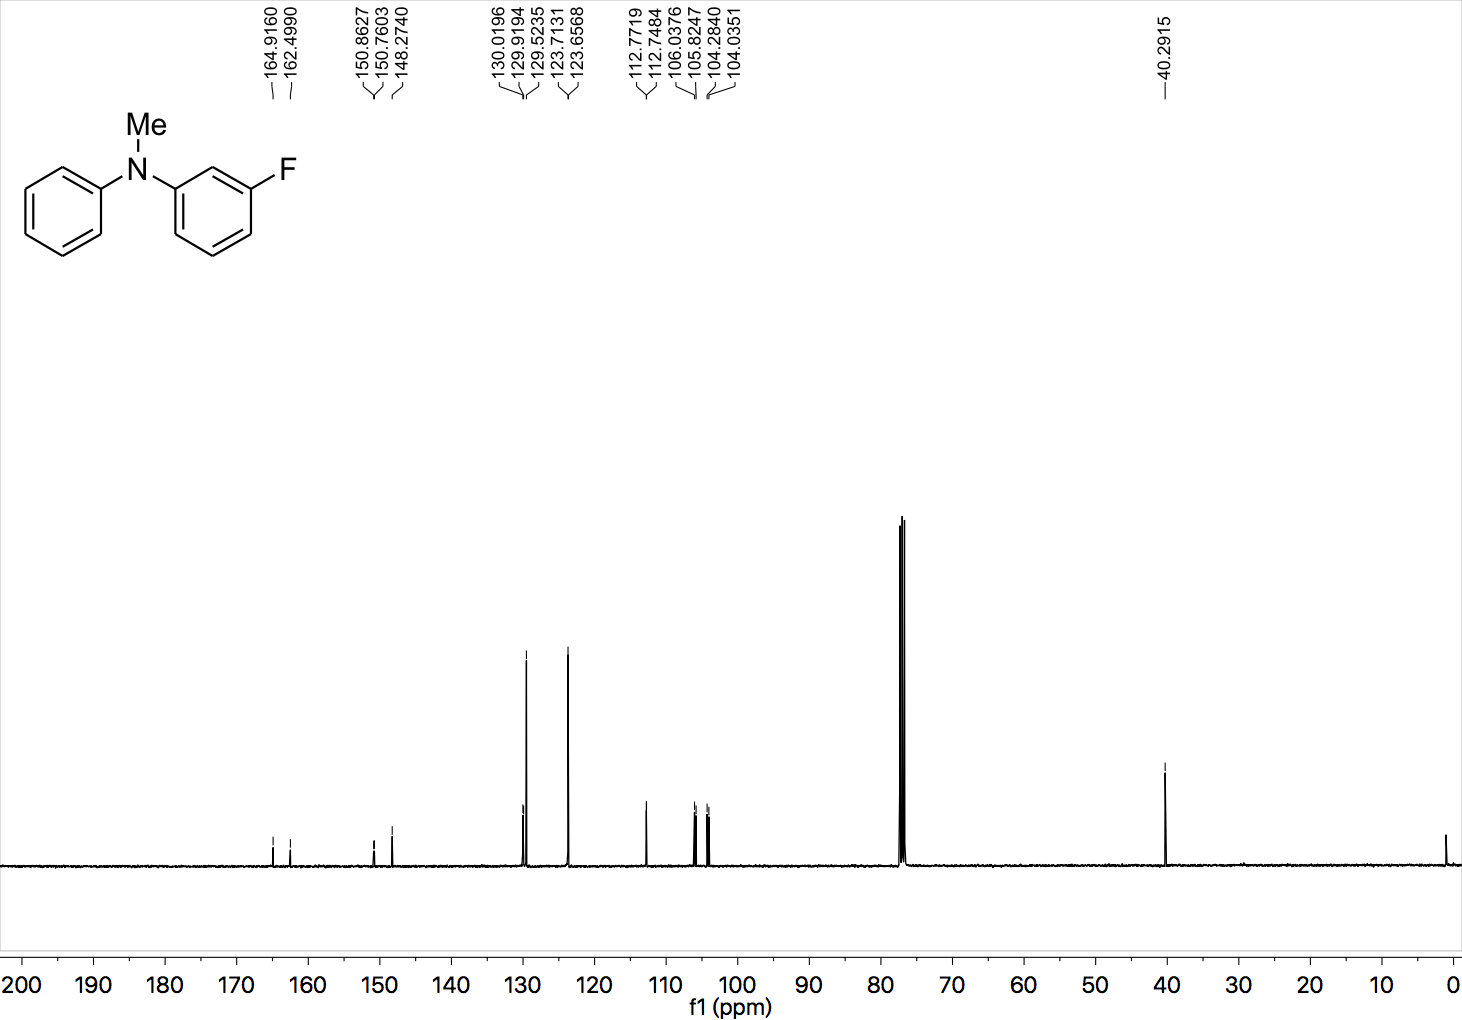


19F NMR (377 MHz, CDCl3) spectrum of **26**.


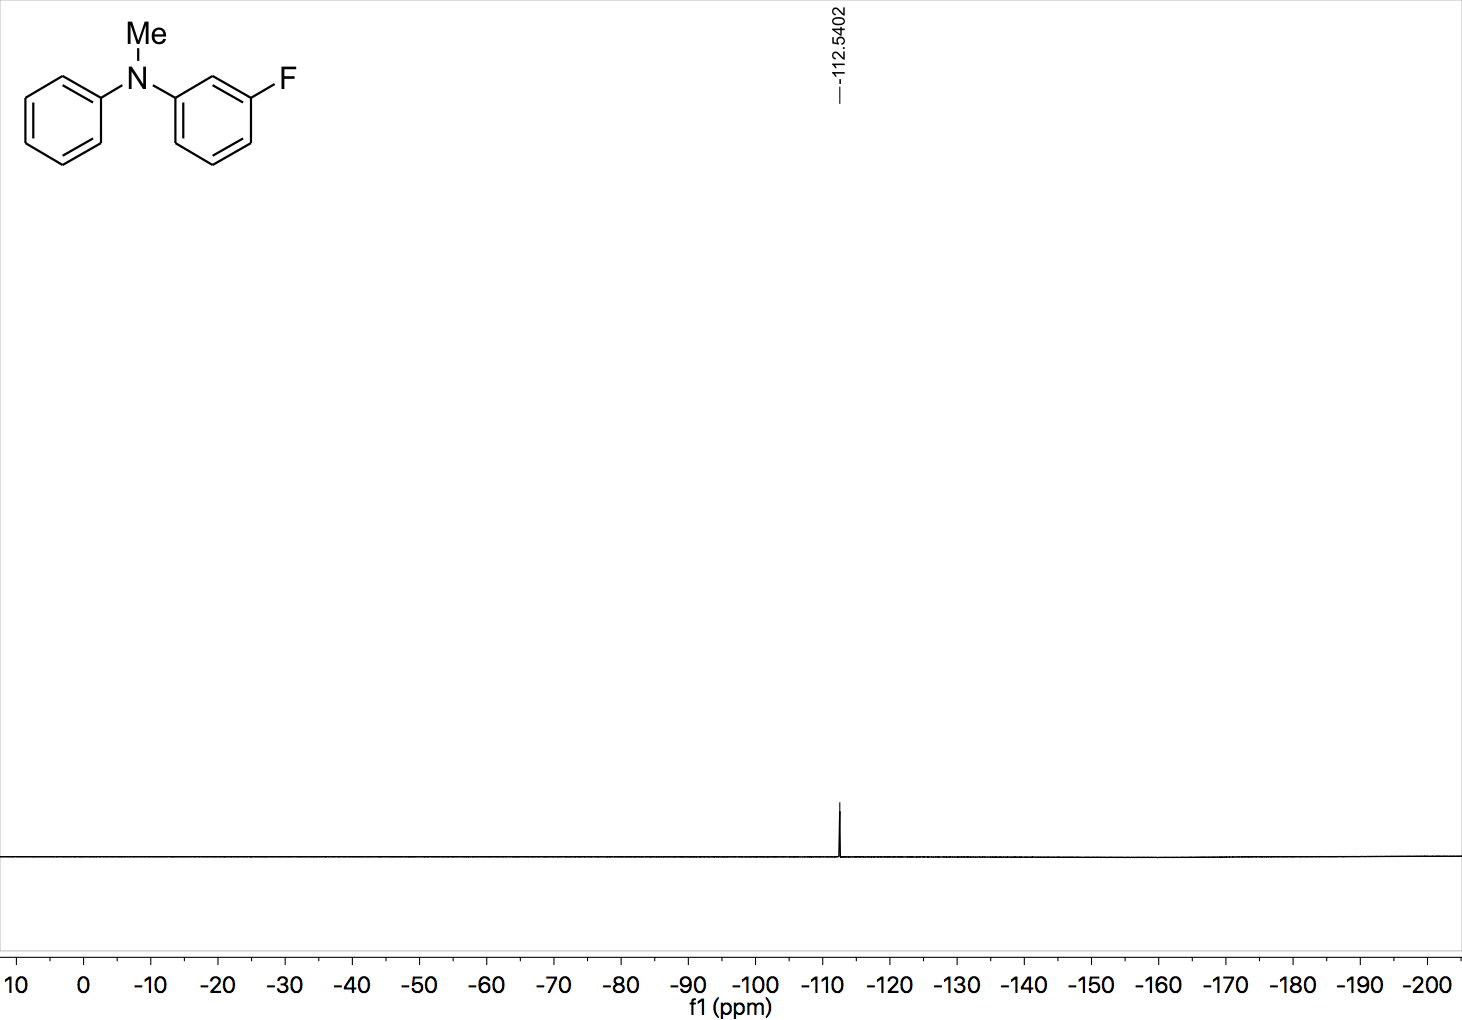


1H NMR (400 MHz, CDCl3) spectrum of **27**.


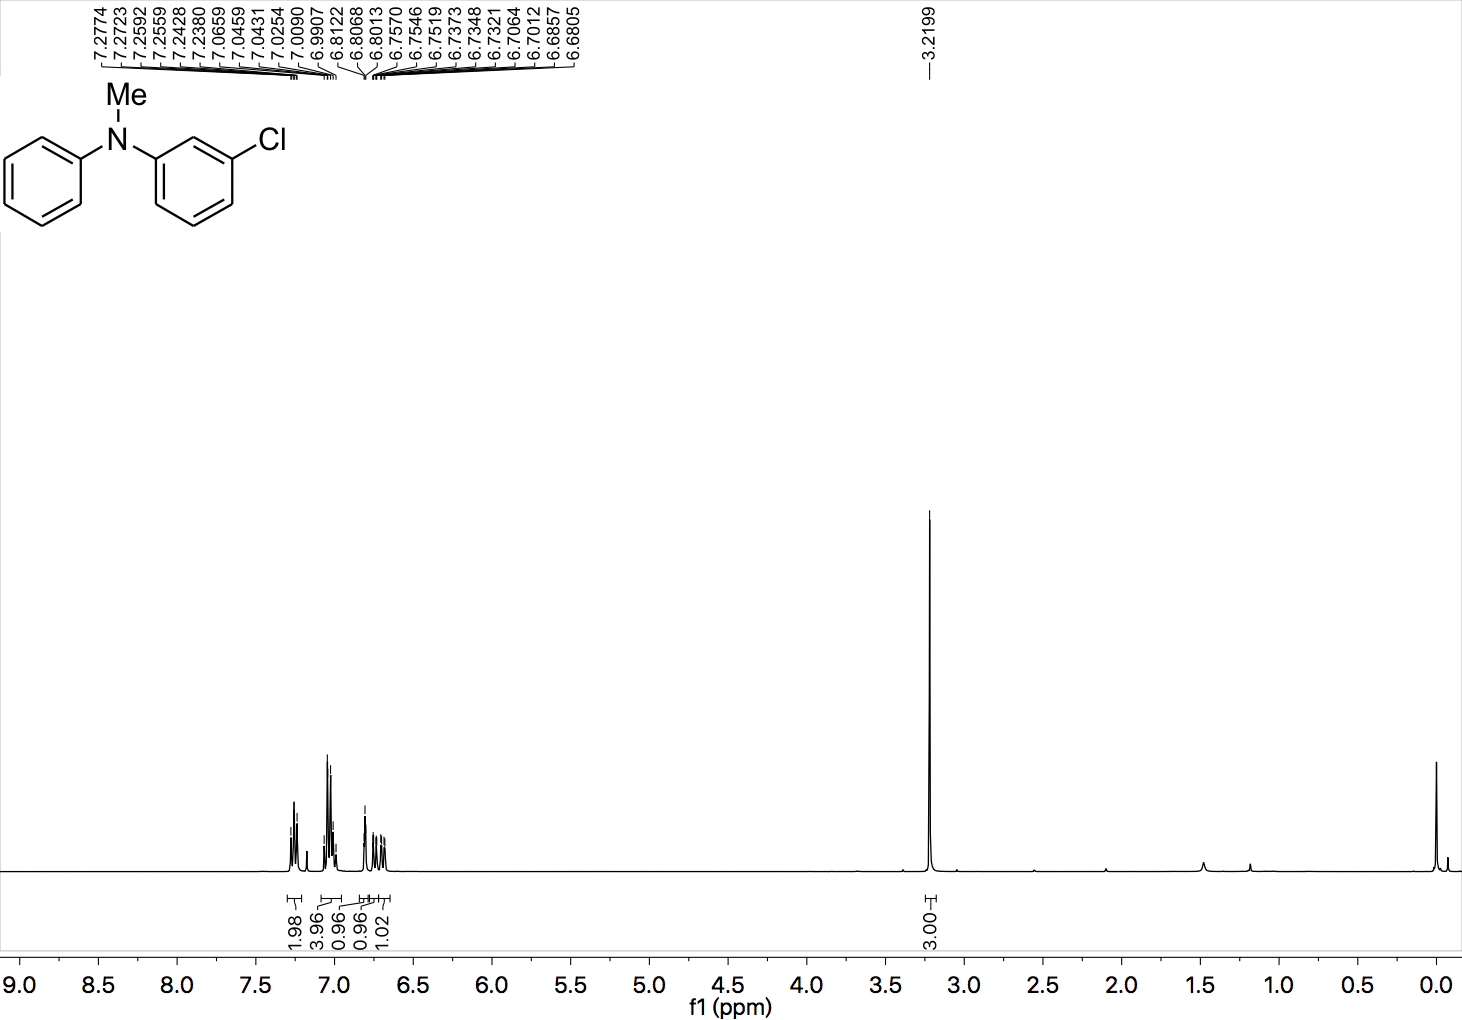


13C NMR (101 MHz, CDCl3) spectrum of **27**.


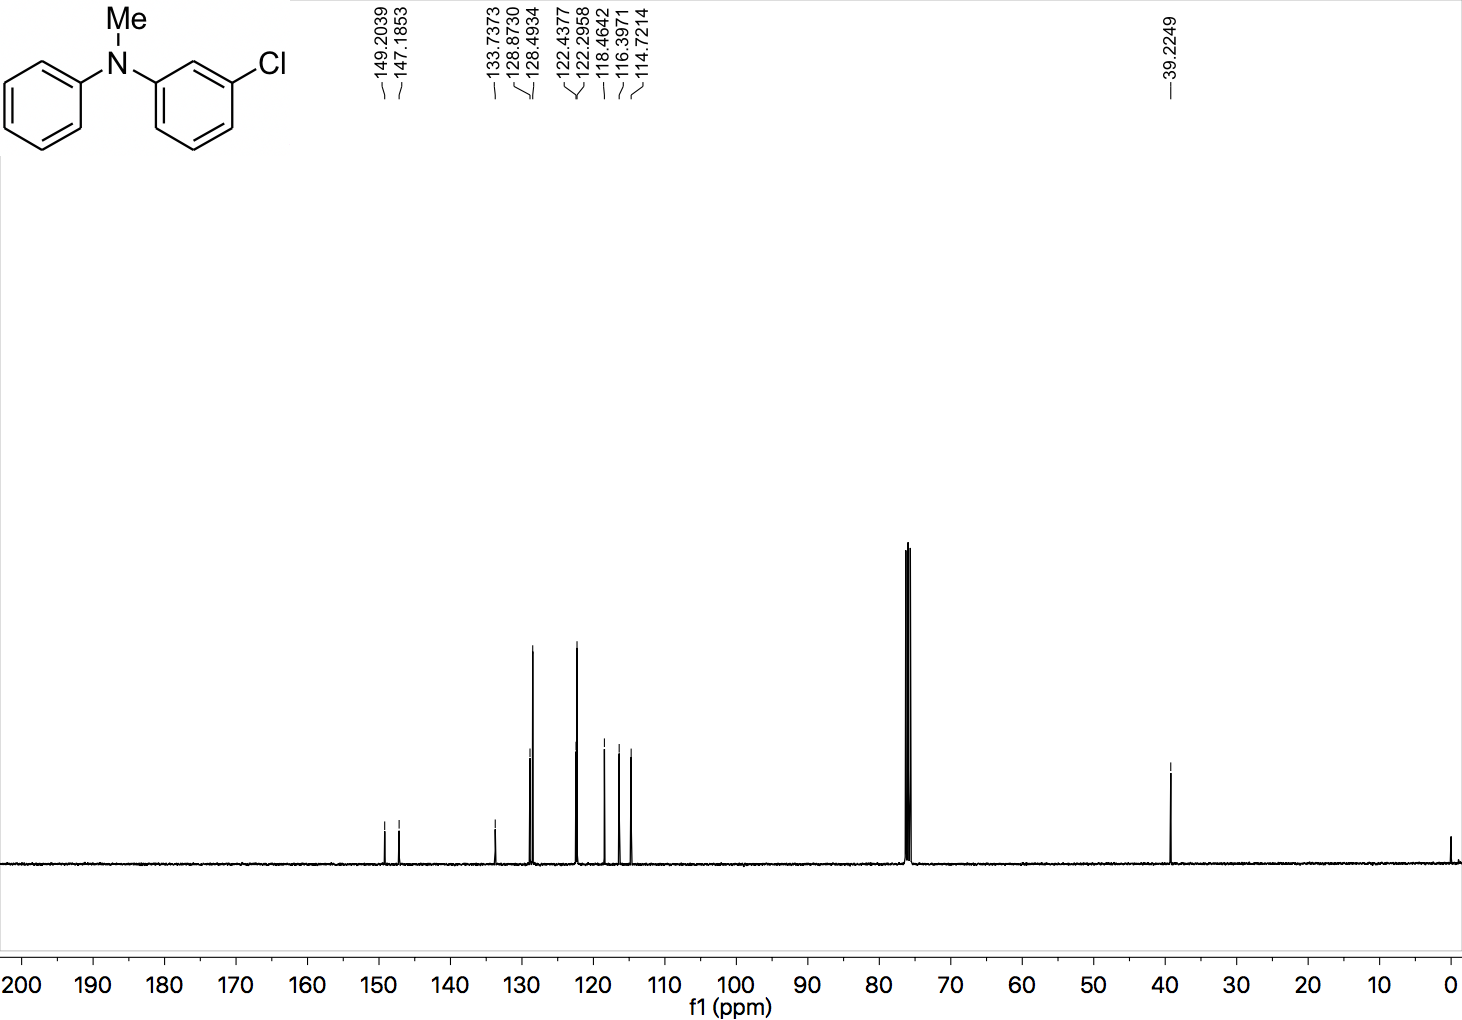


1H NMR (400 MHz, CDCl3) spectrum of **28**.


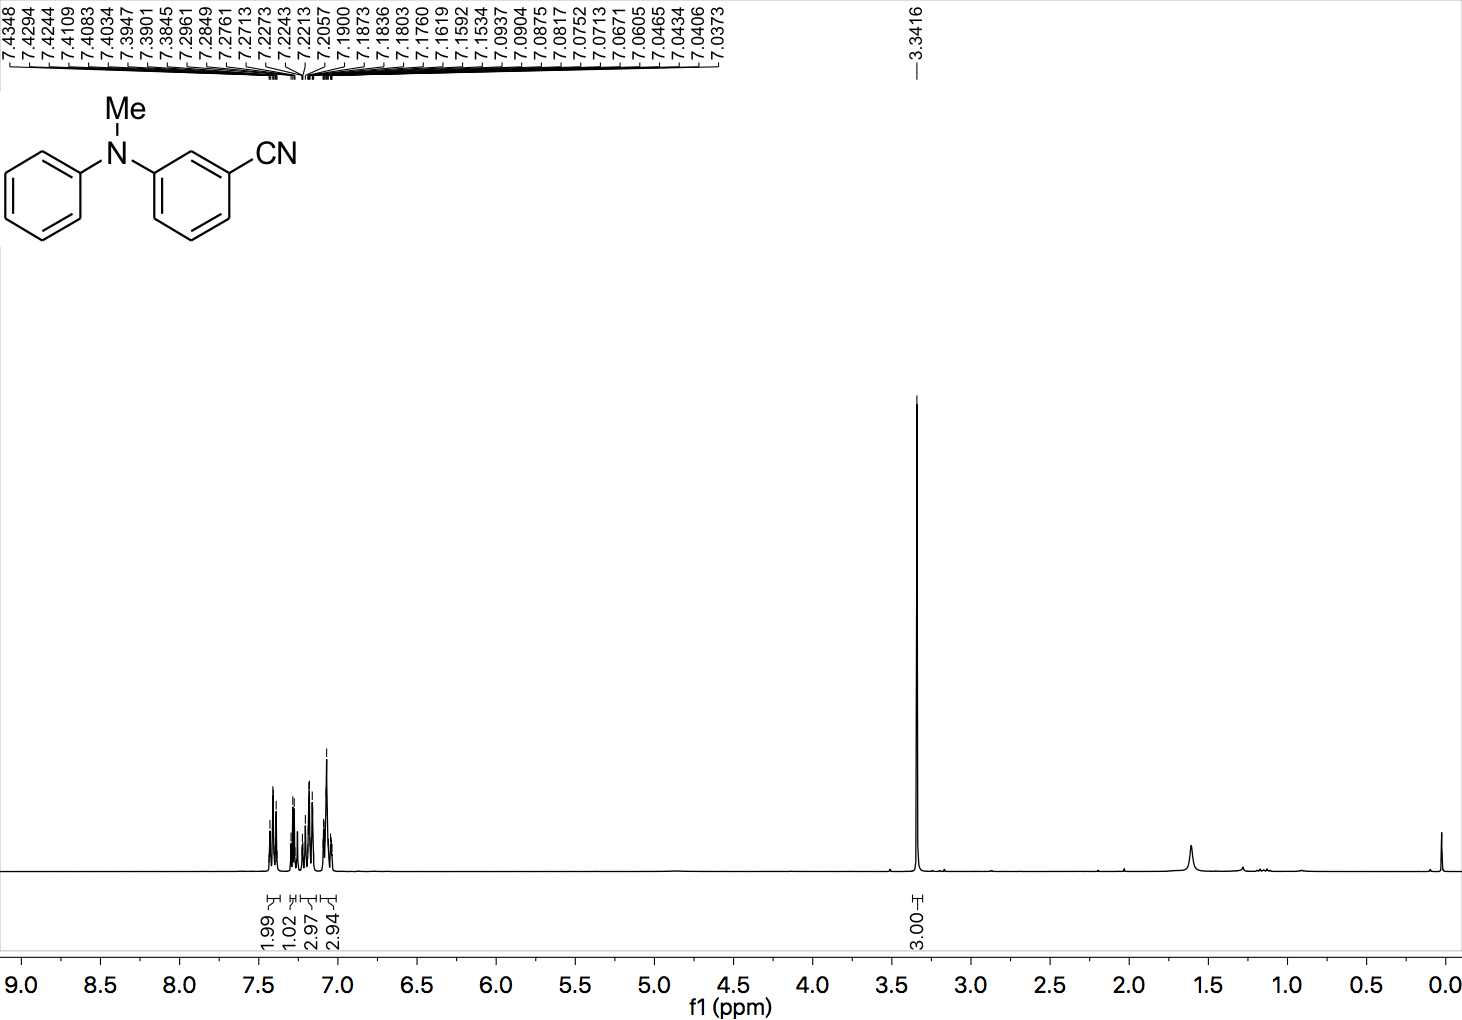


13C NMR (101 MHz, CDCl3) spectrum of **28**.


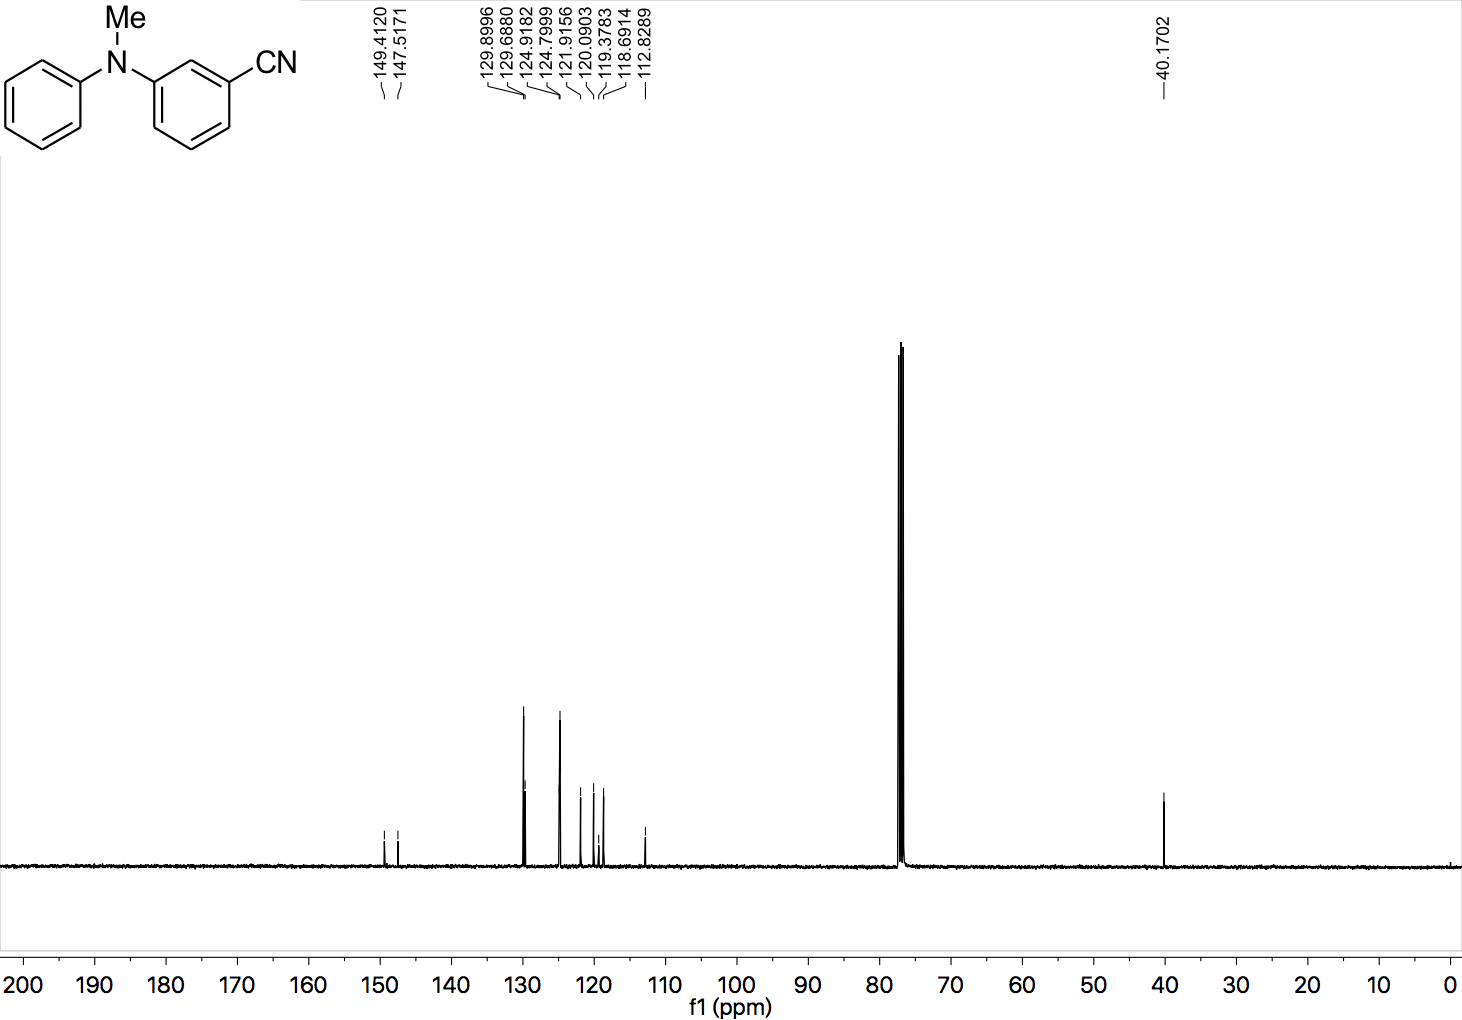


1H NMR (400 MHz, CDCl3) spectrum of **29**.


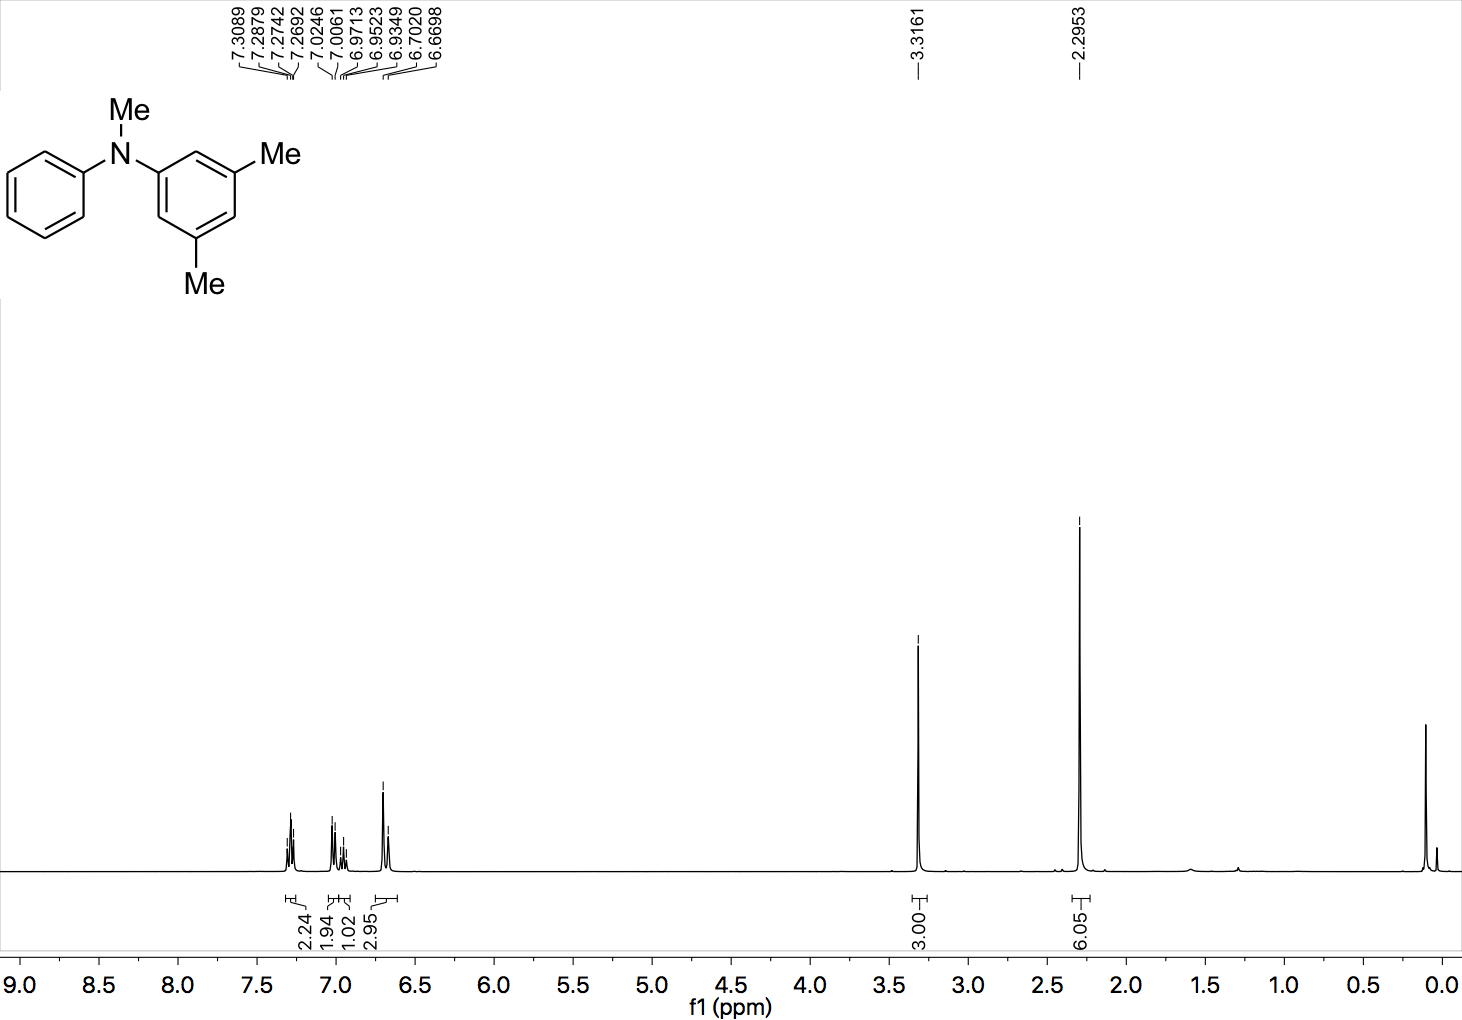


13C NMR (101 MHz, CDCl3) spectrum of **29**.


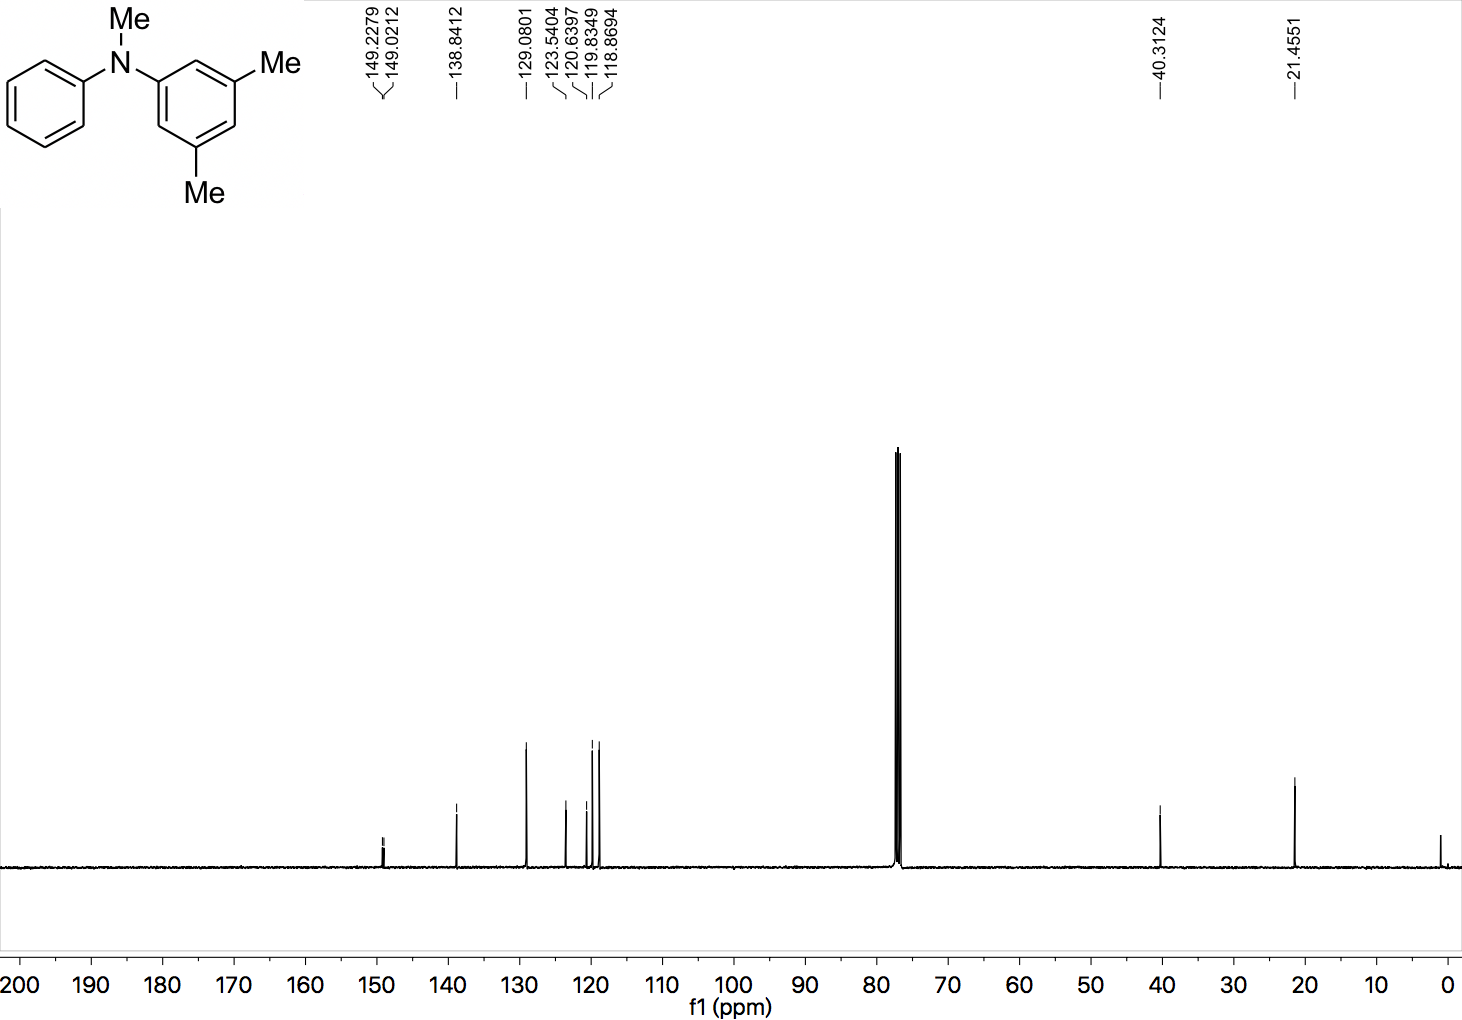


1H NMR (400 MHz, CDCl3) spectrum of **30**.


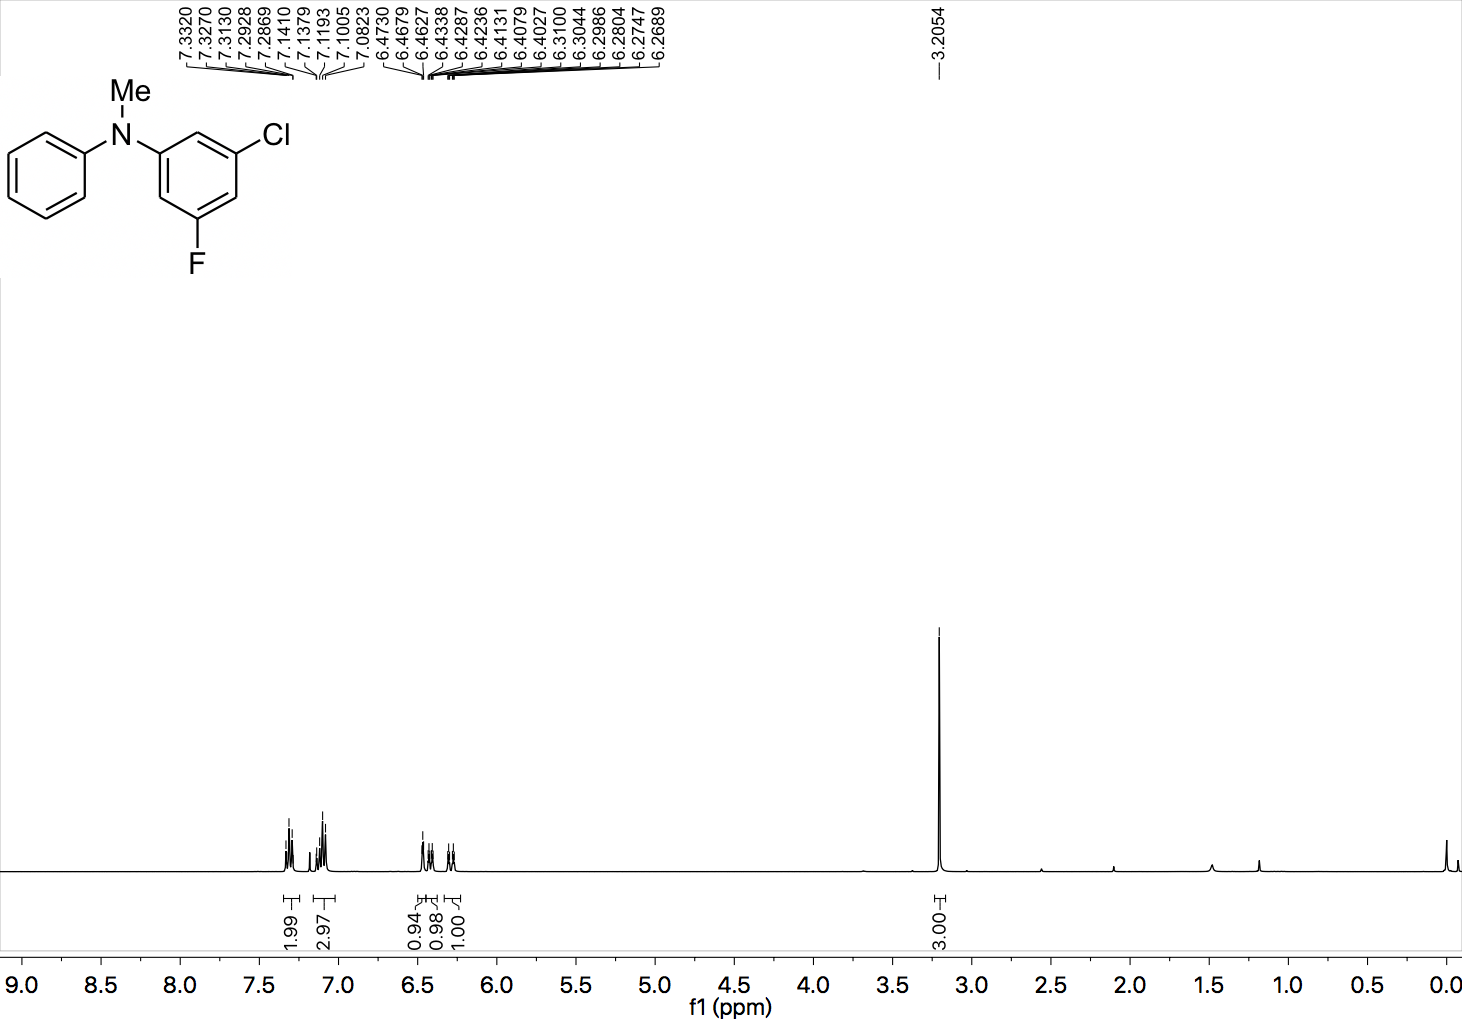


13C NMR (101 MHz, CDCl3) spectrum of **30**.


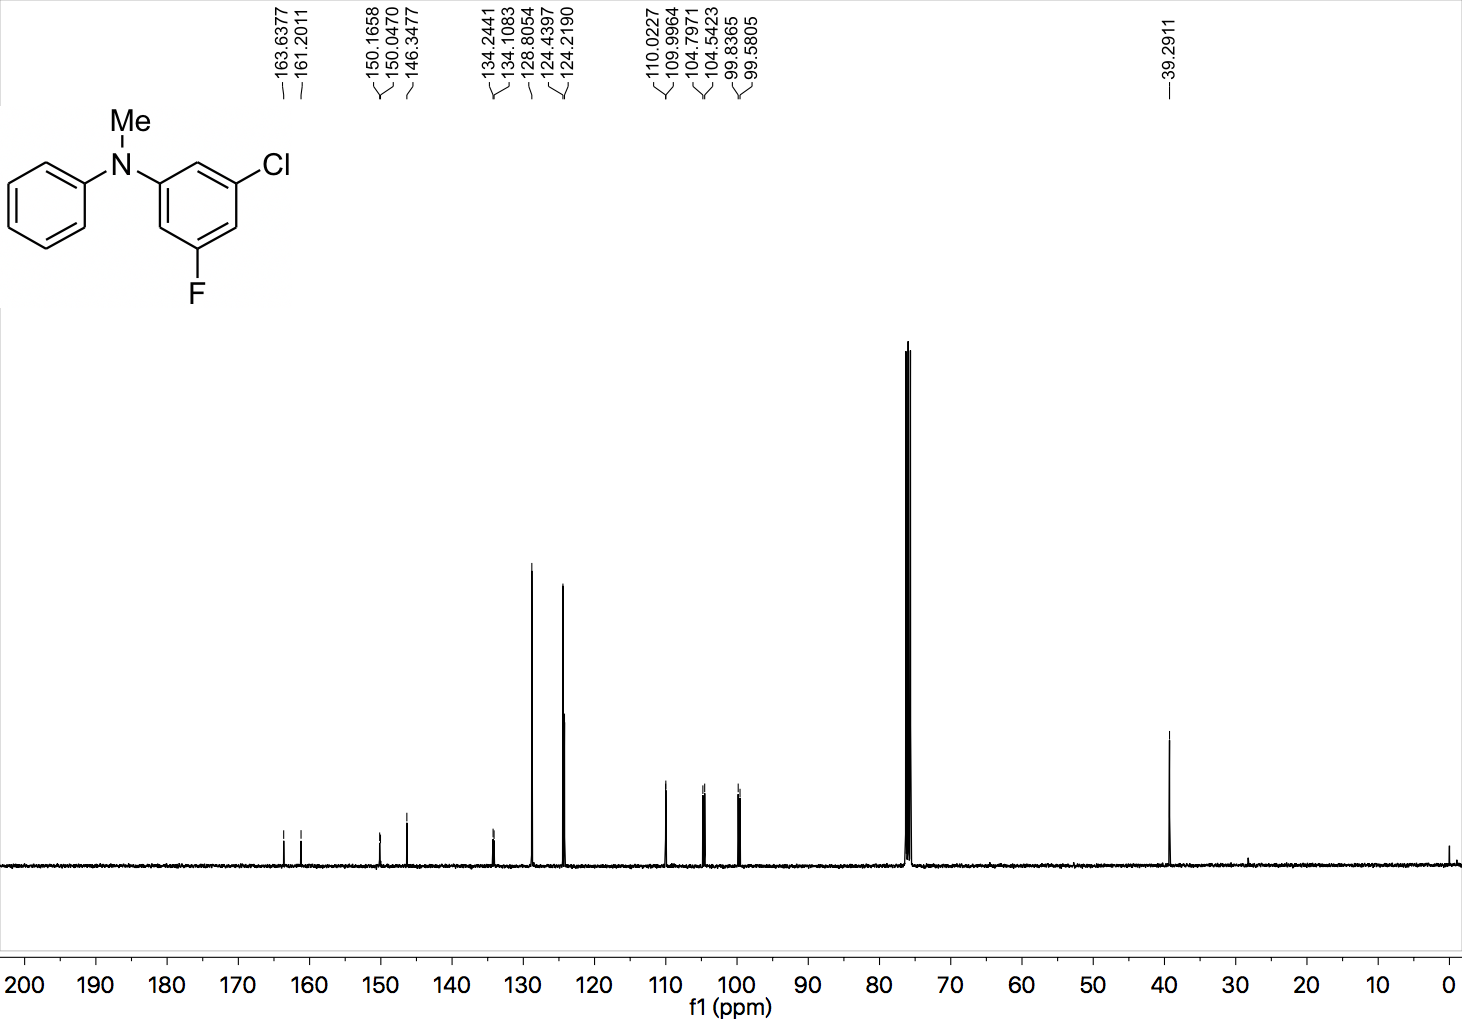


19F NMR (377 MHz, CDCl3) spectrum of **30**.


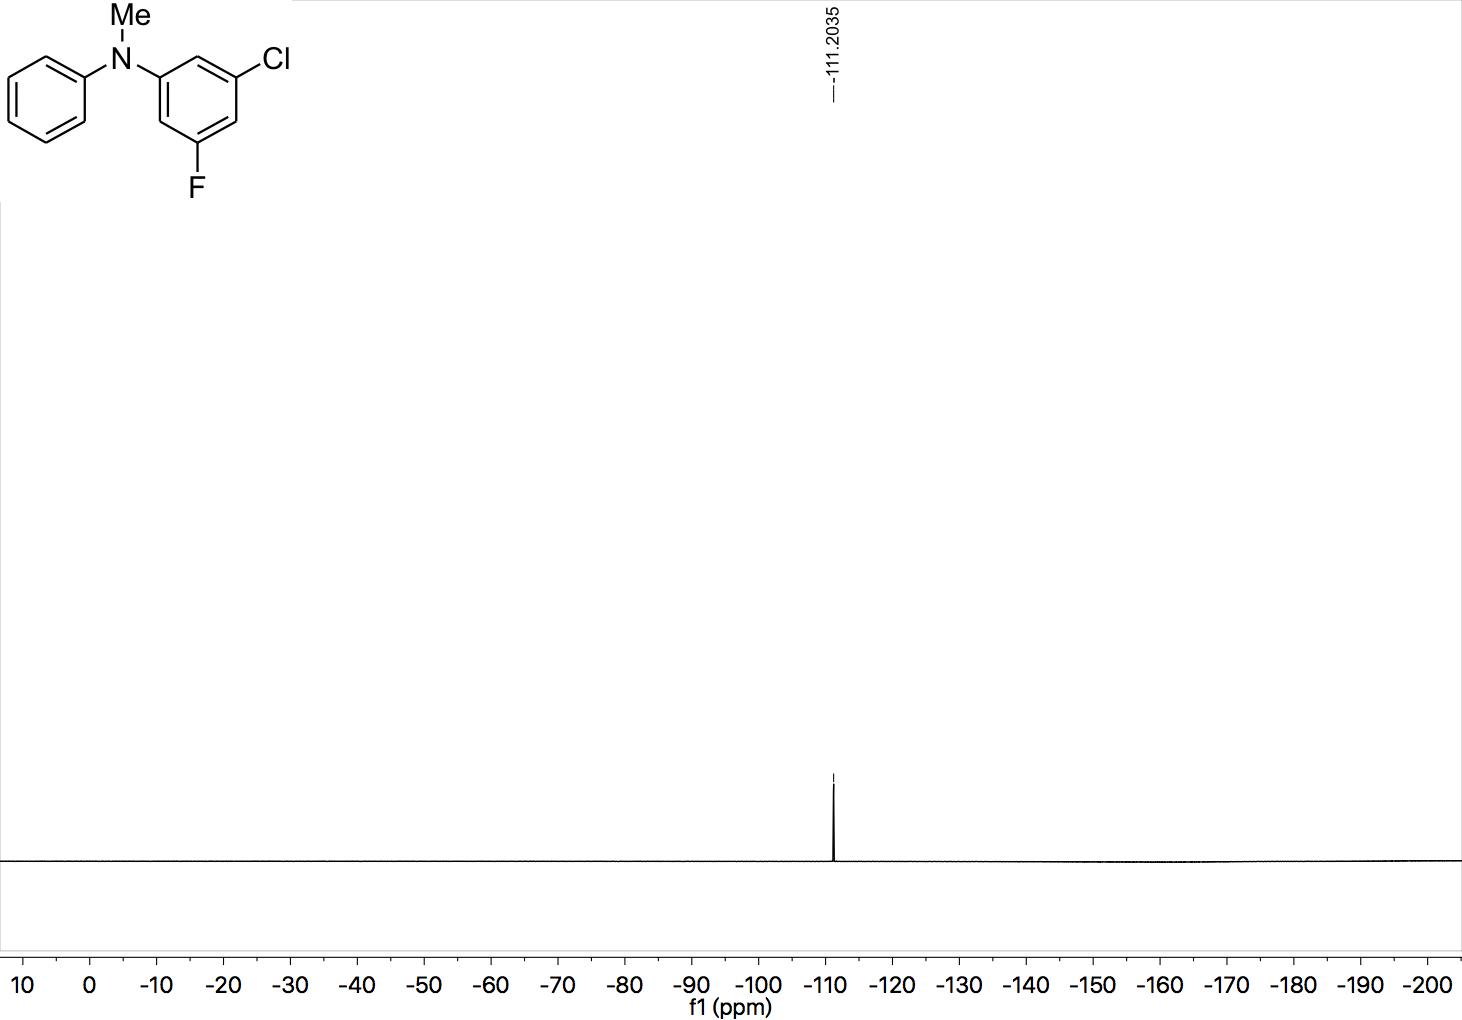


1H NMR (400 MHz, CDCl3) spectrum of **31**.


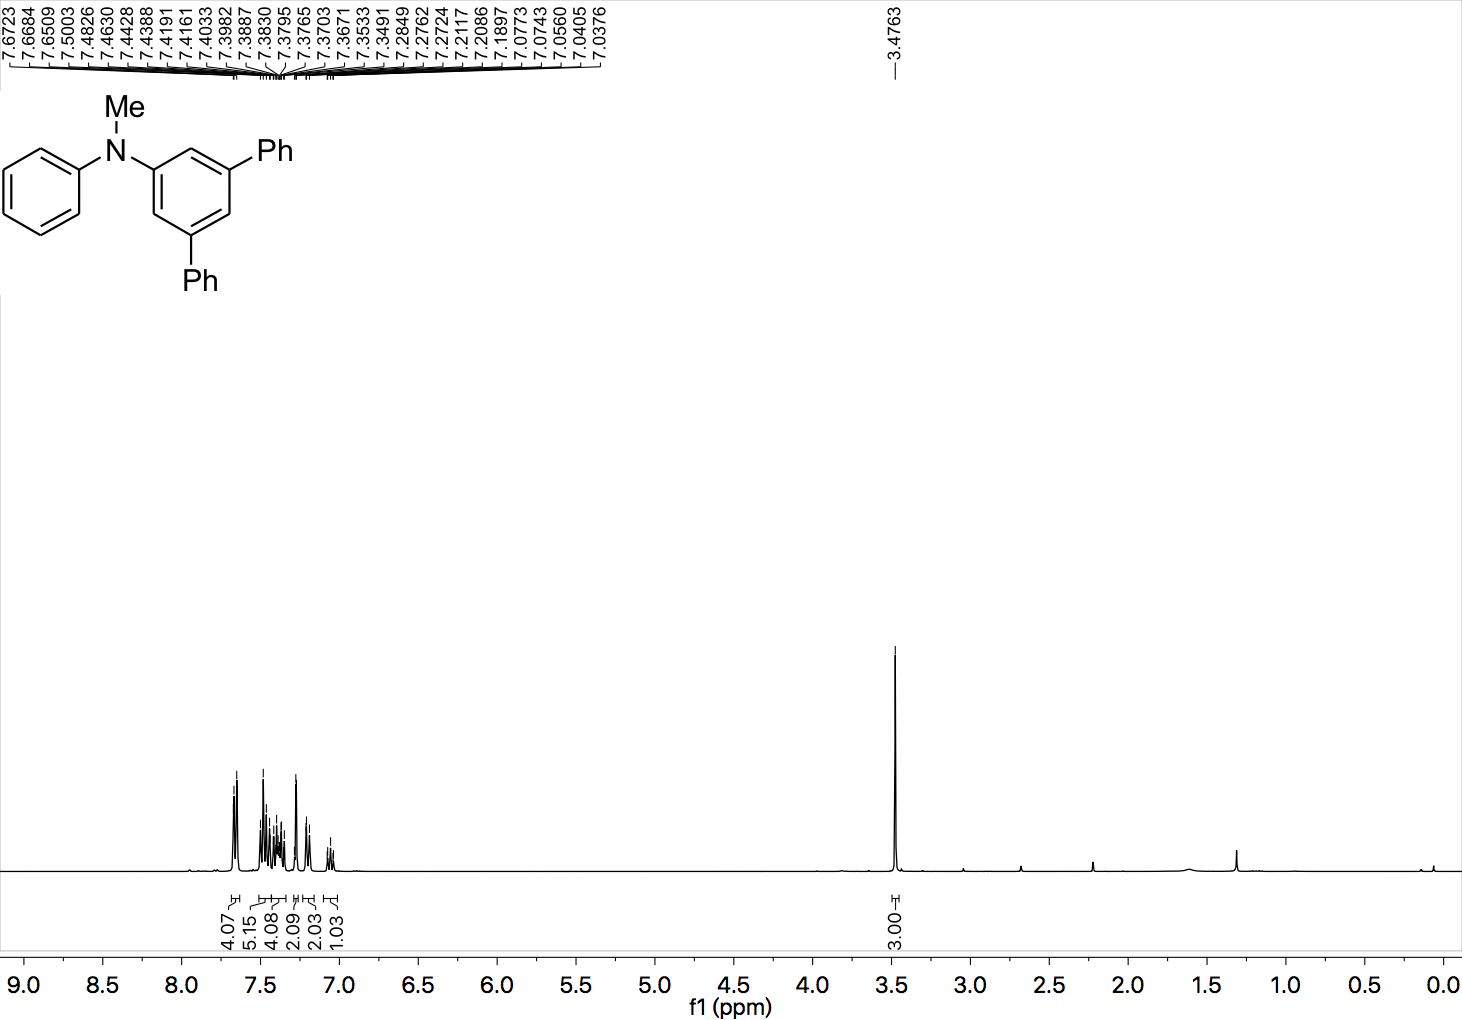


13C NMR (101 MHz, CDCl3) spectrum of **31**.


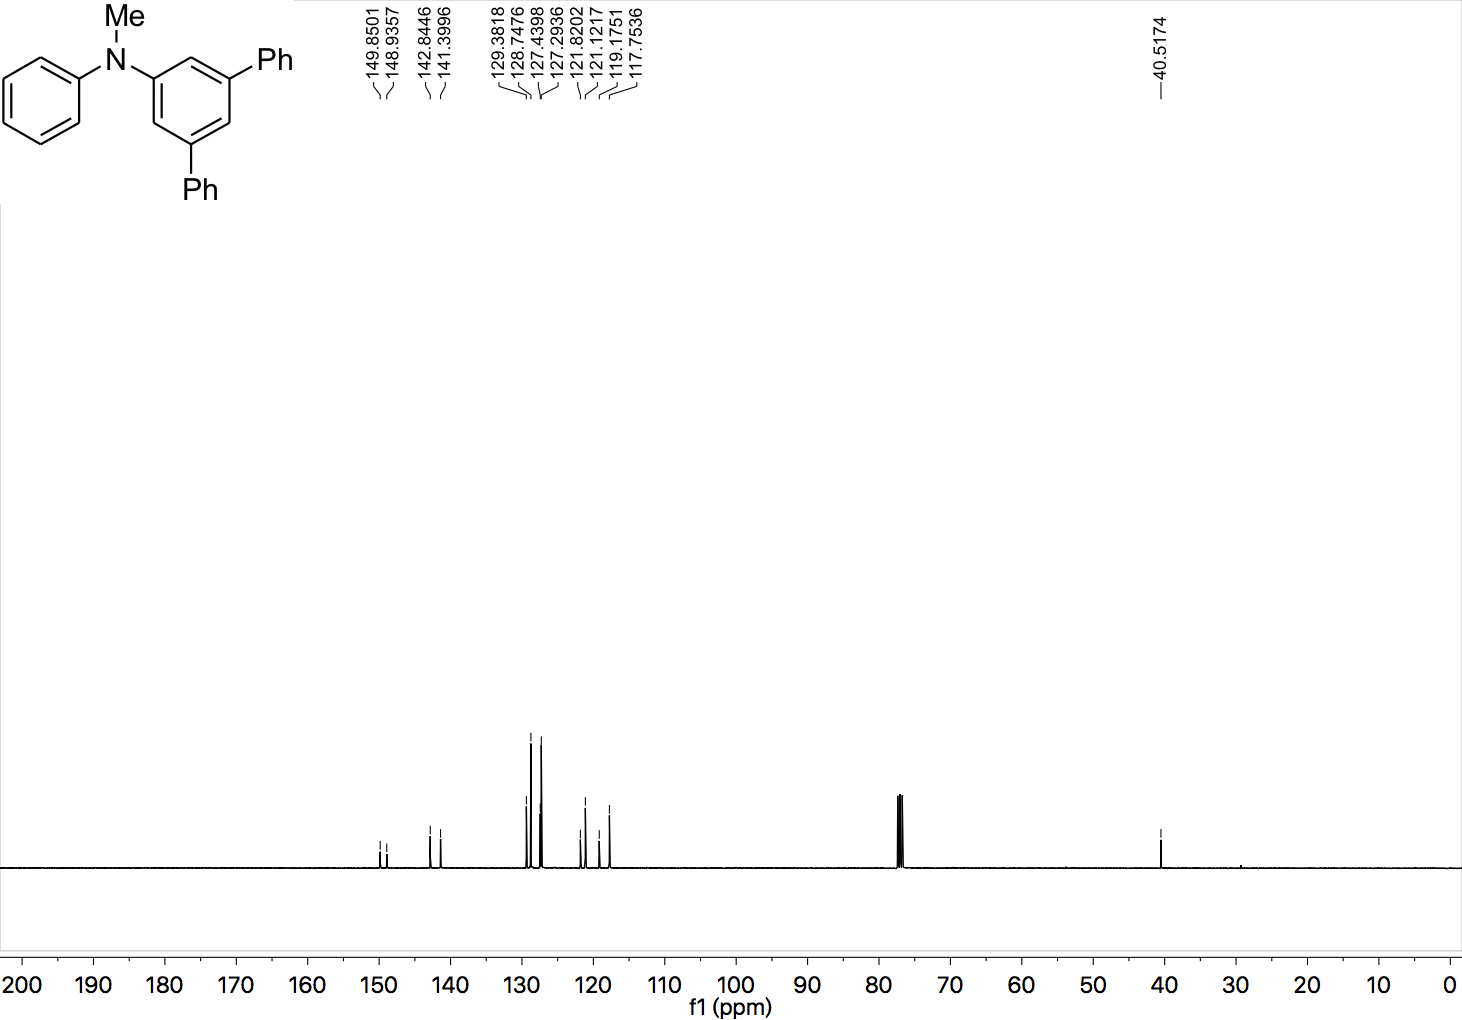


1H NMR (400 MHz, CDCl3) spectrum of **32**.


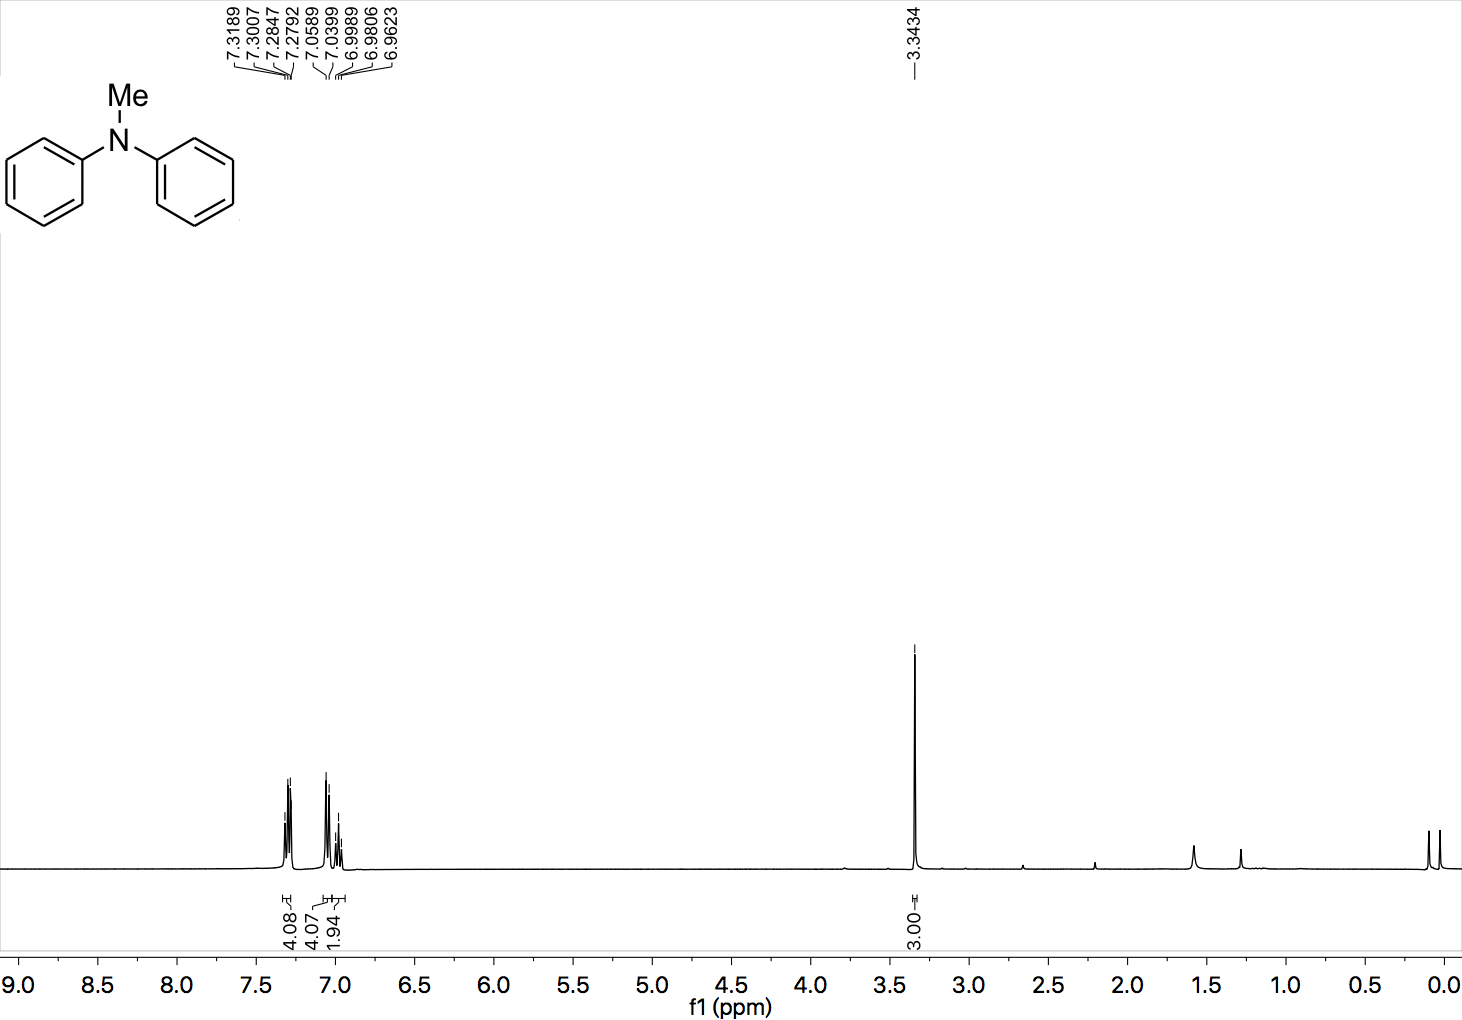


13C NMR (101 MHz, CDCl3) spectrum of **32**.


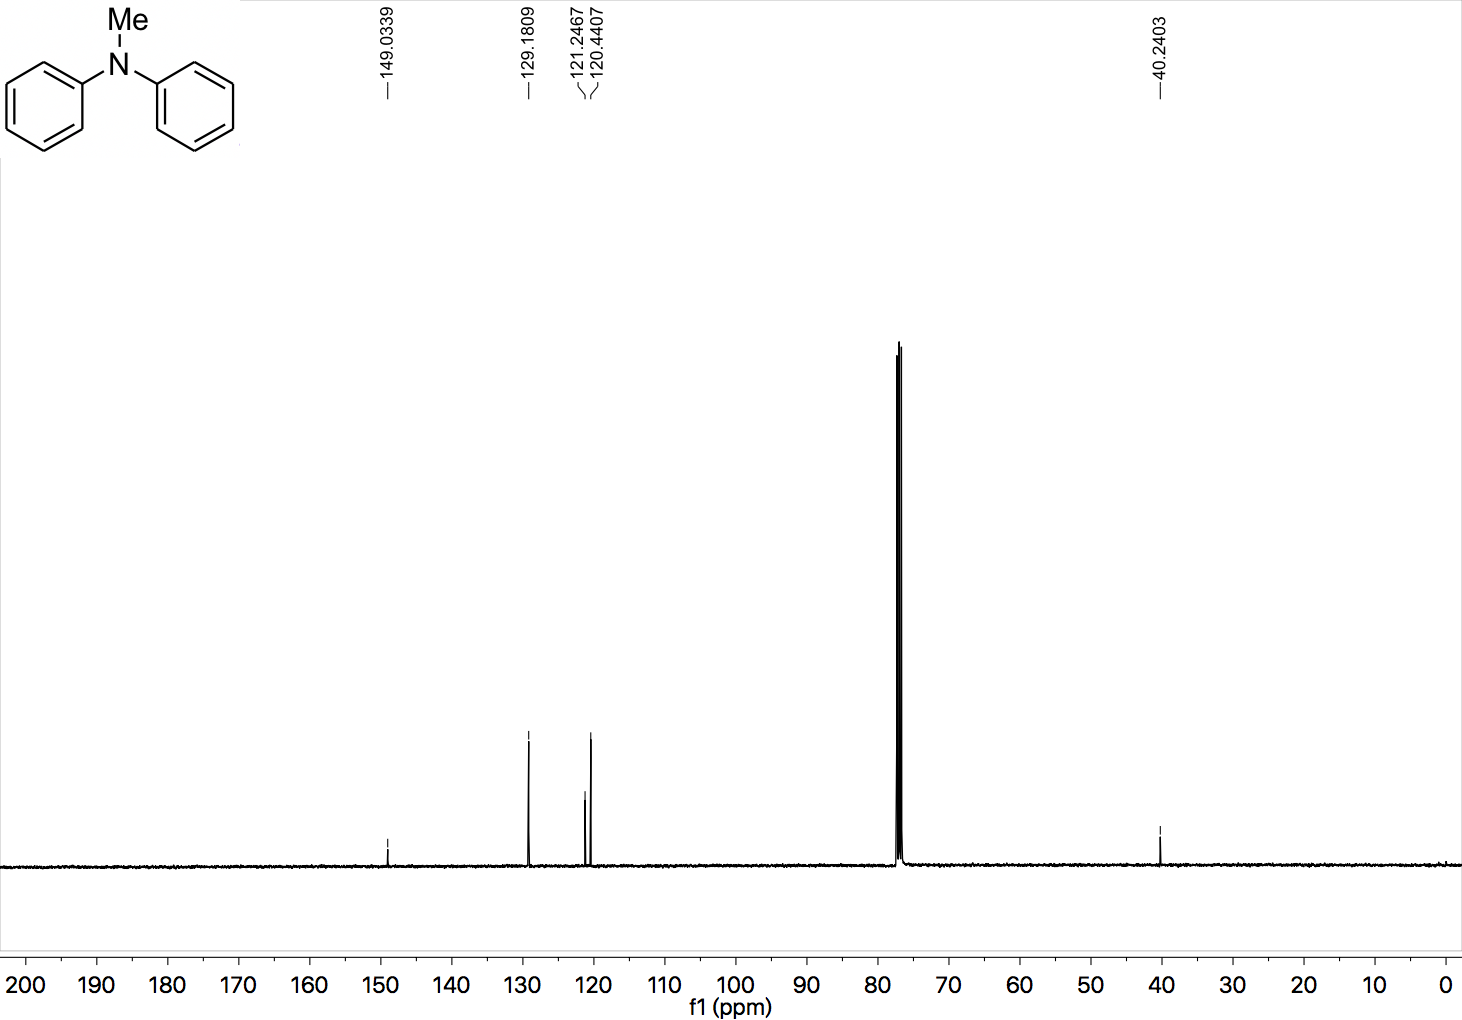


1H NMR (400 MHz, CDCl3) spectrum of **33**.


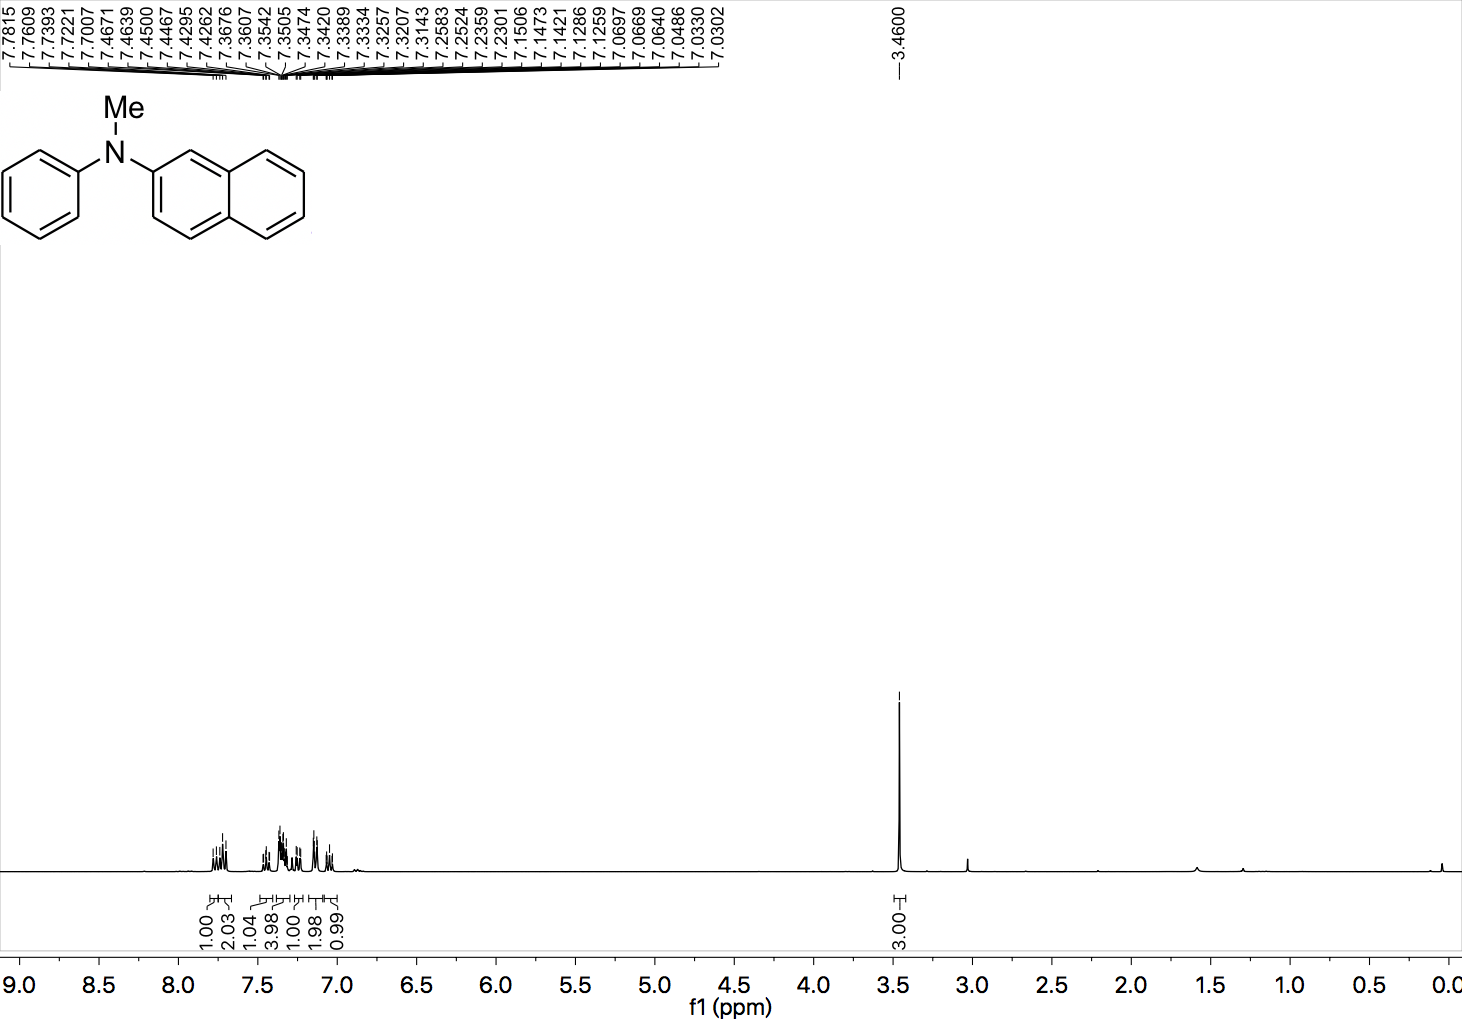


13C NMR (101 MHz, CDCl3) spectrum of **33**.


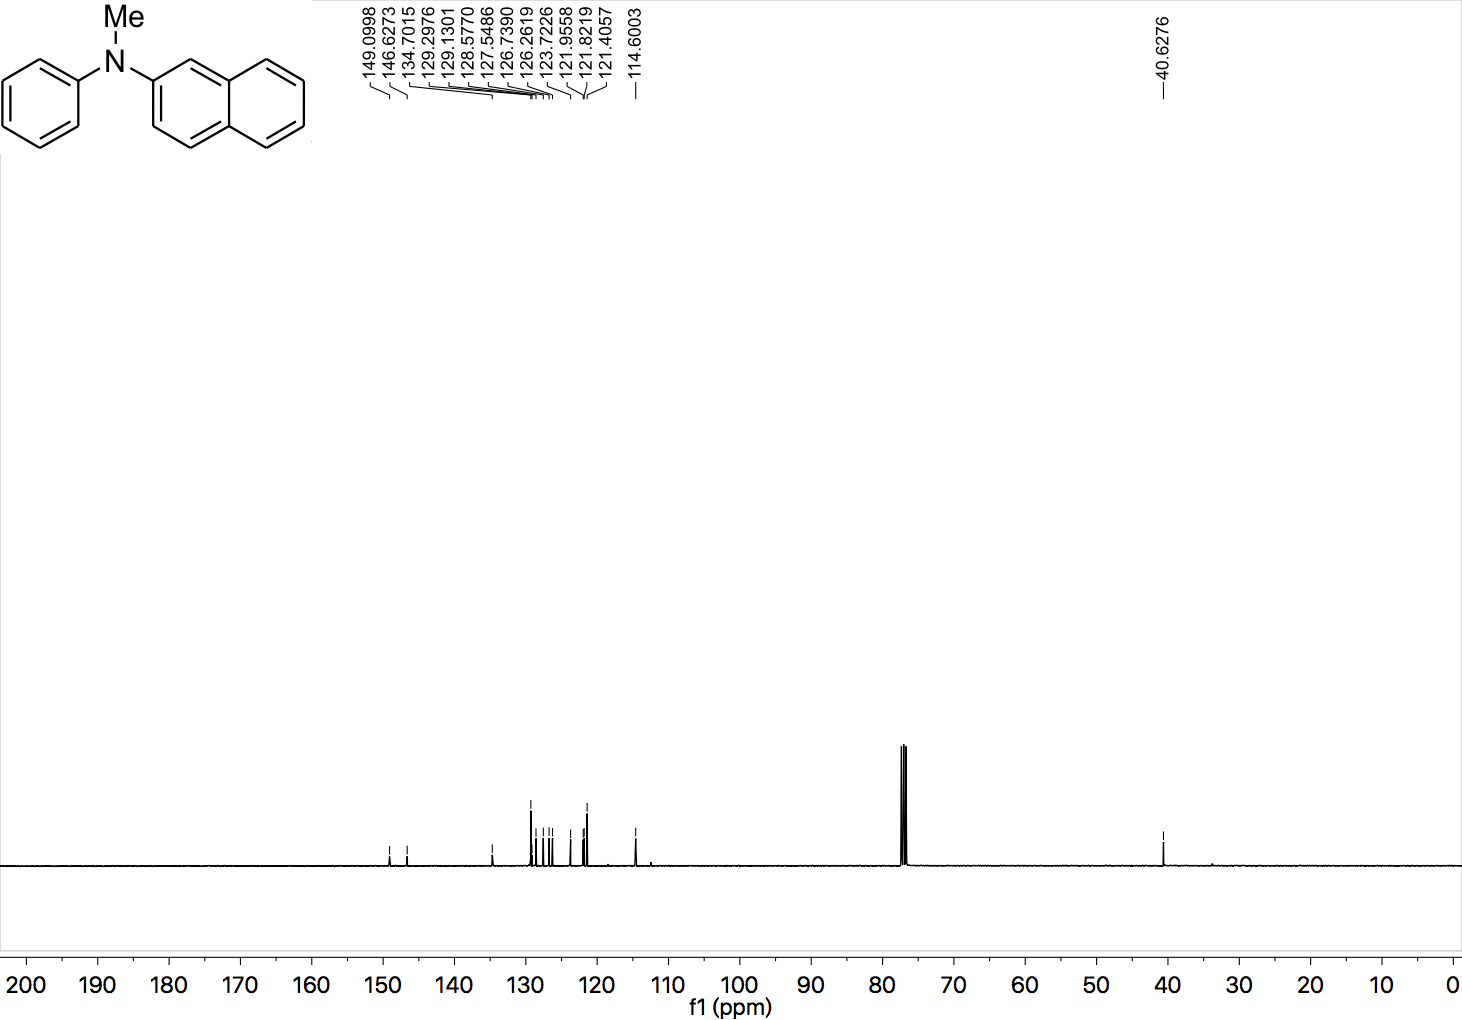


1H NMR (400 MHz, CDCl3) spectrum of **34**.


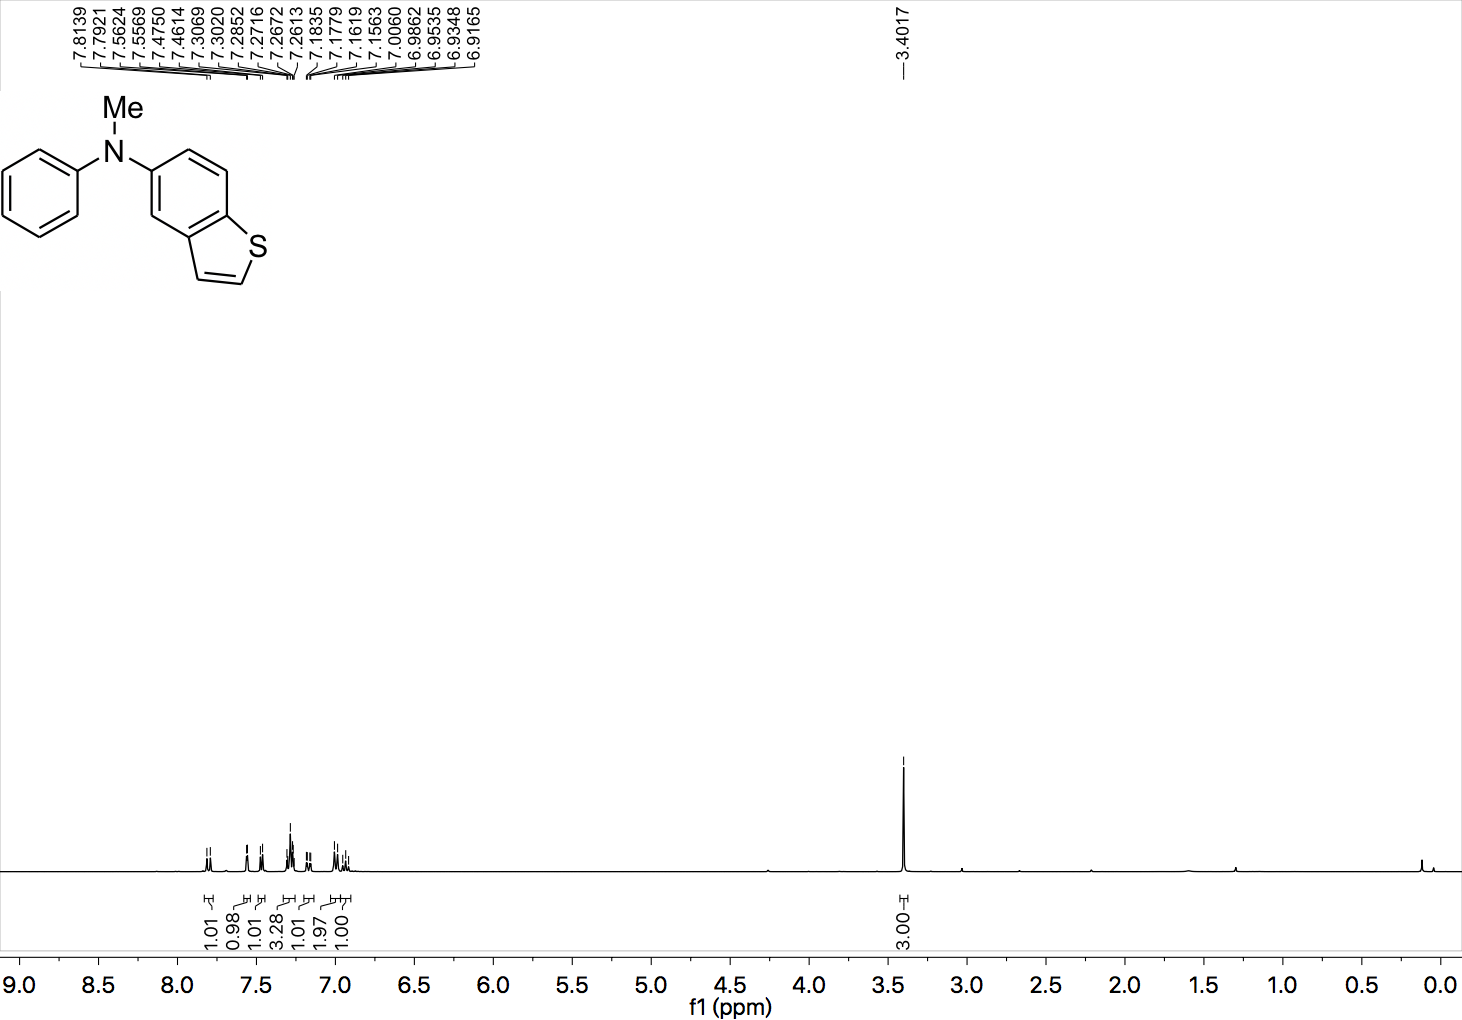


13C NMR (101 MHz, CDCl3) spectrum of **34**.


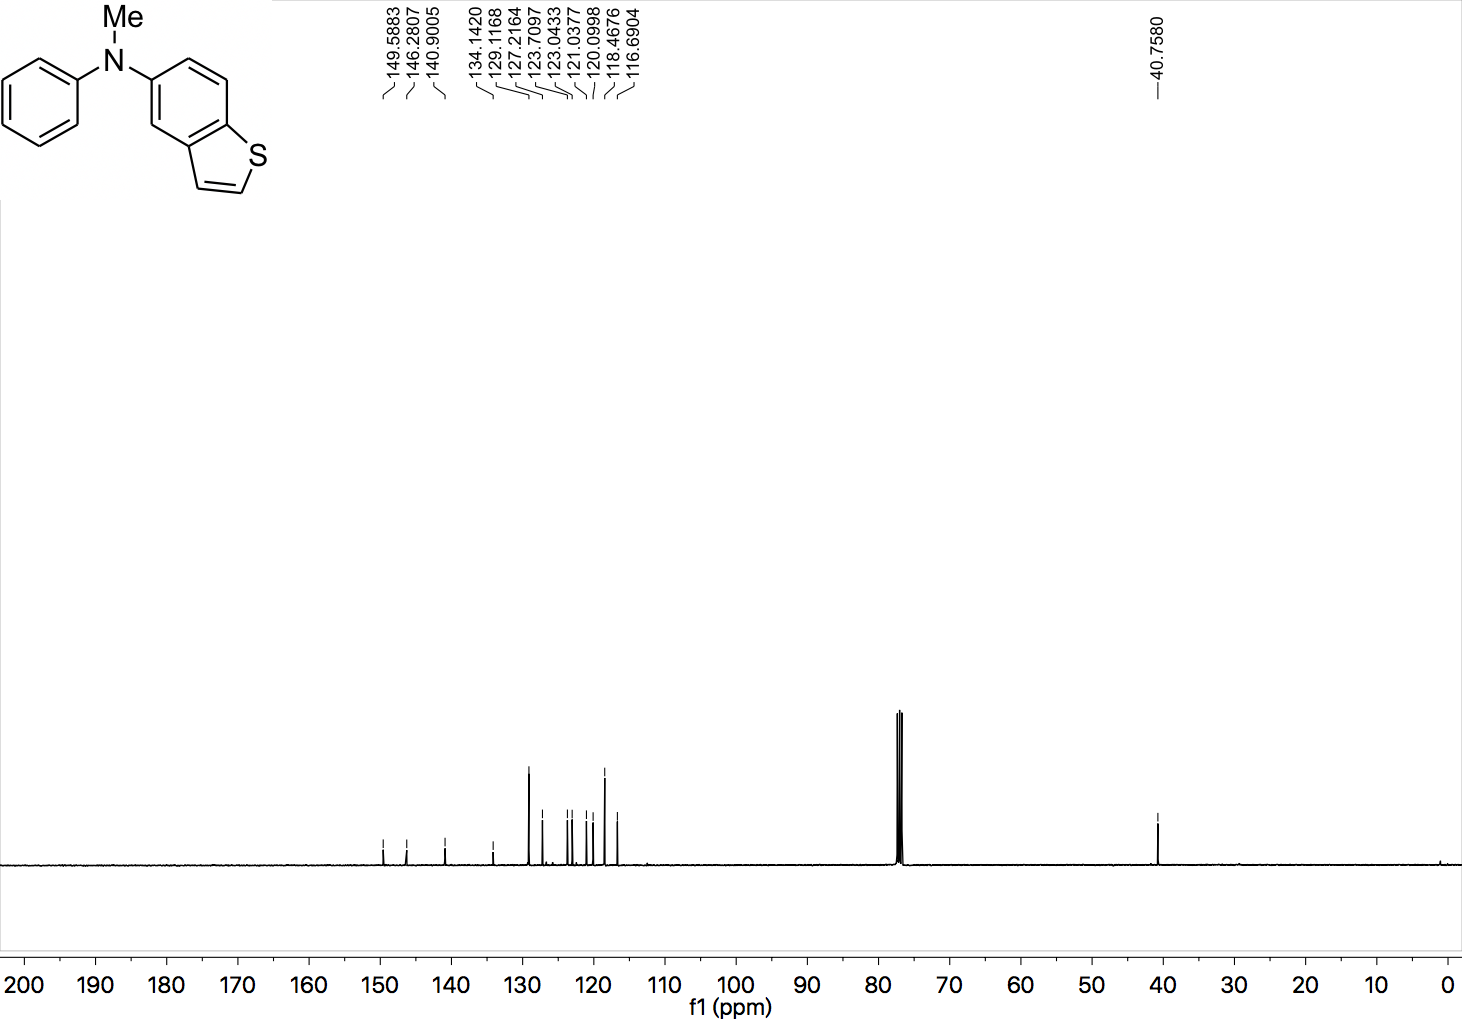


1H NMR (400 MHz, CDCl3) spectrum of **35**.


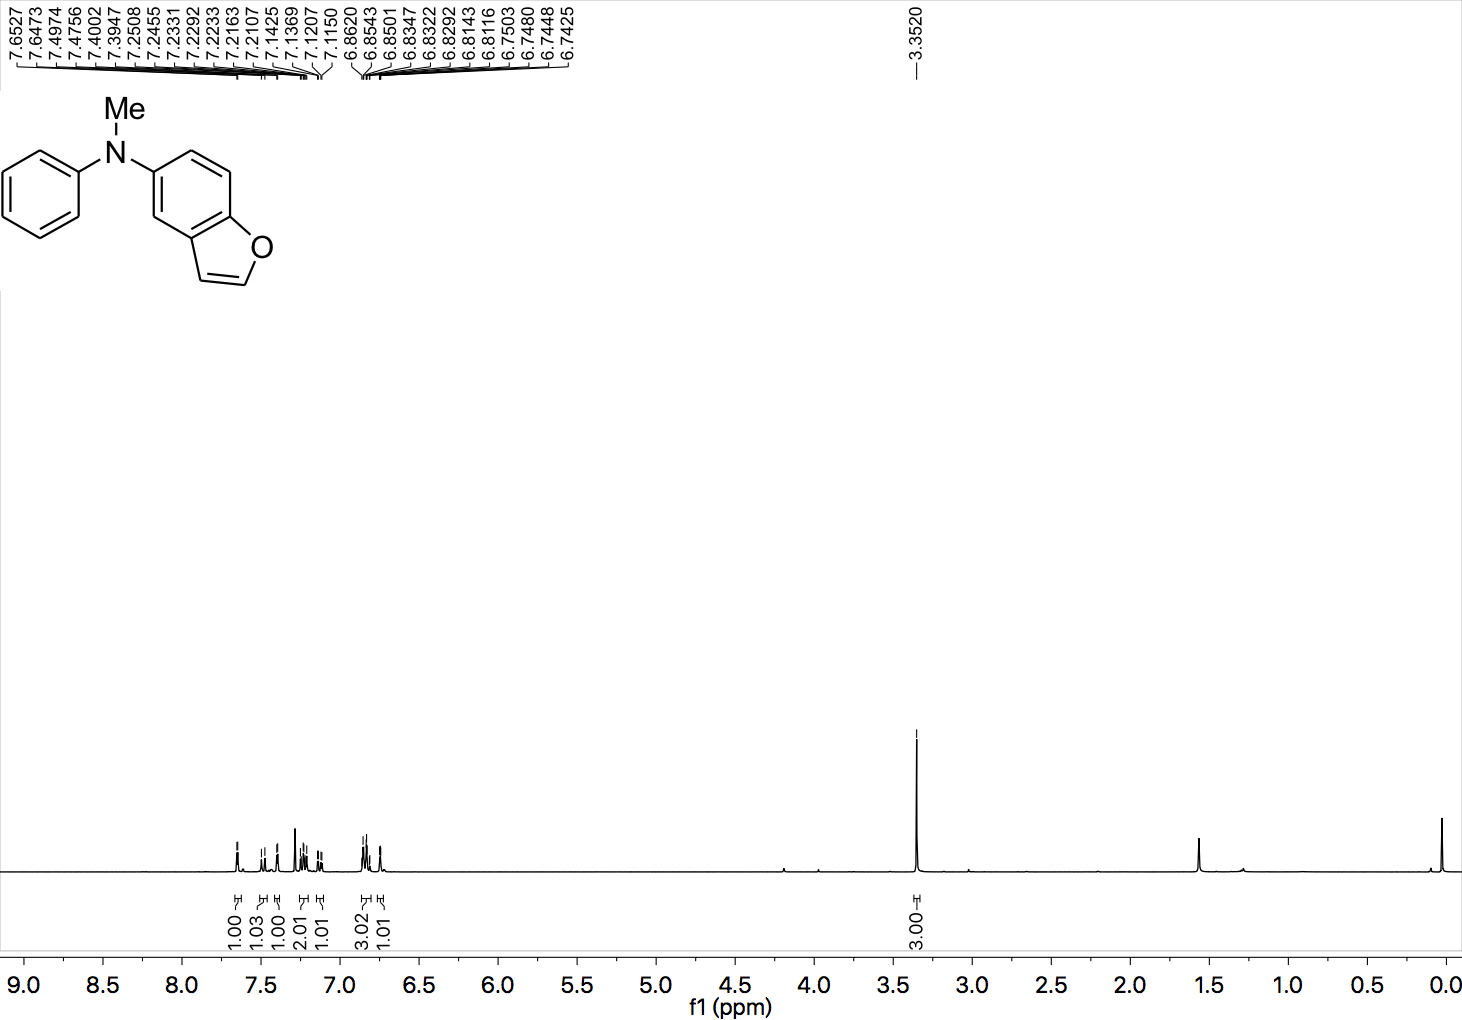


13C NMR (101 MHz, CDCl3) spectrum of **35**.


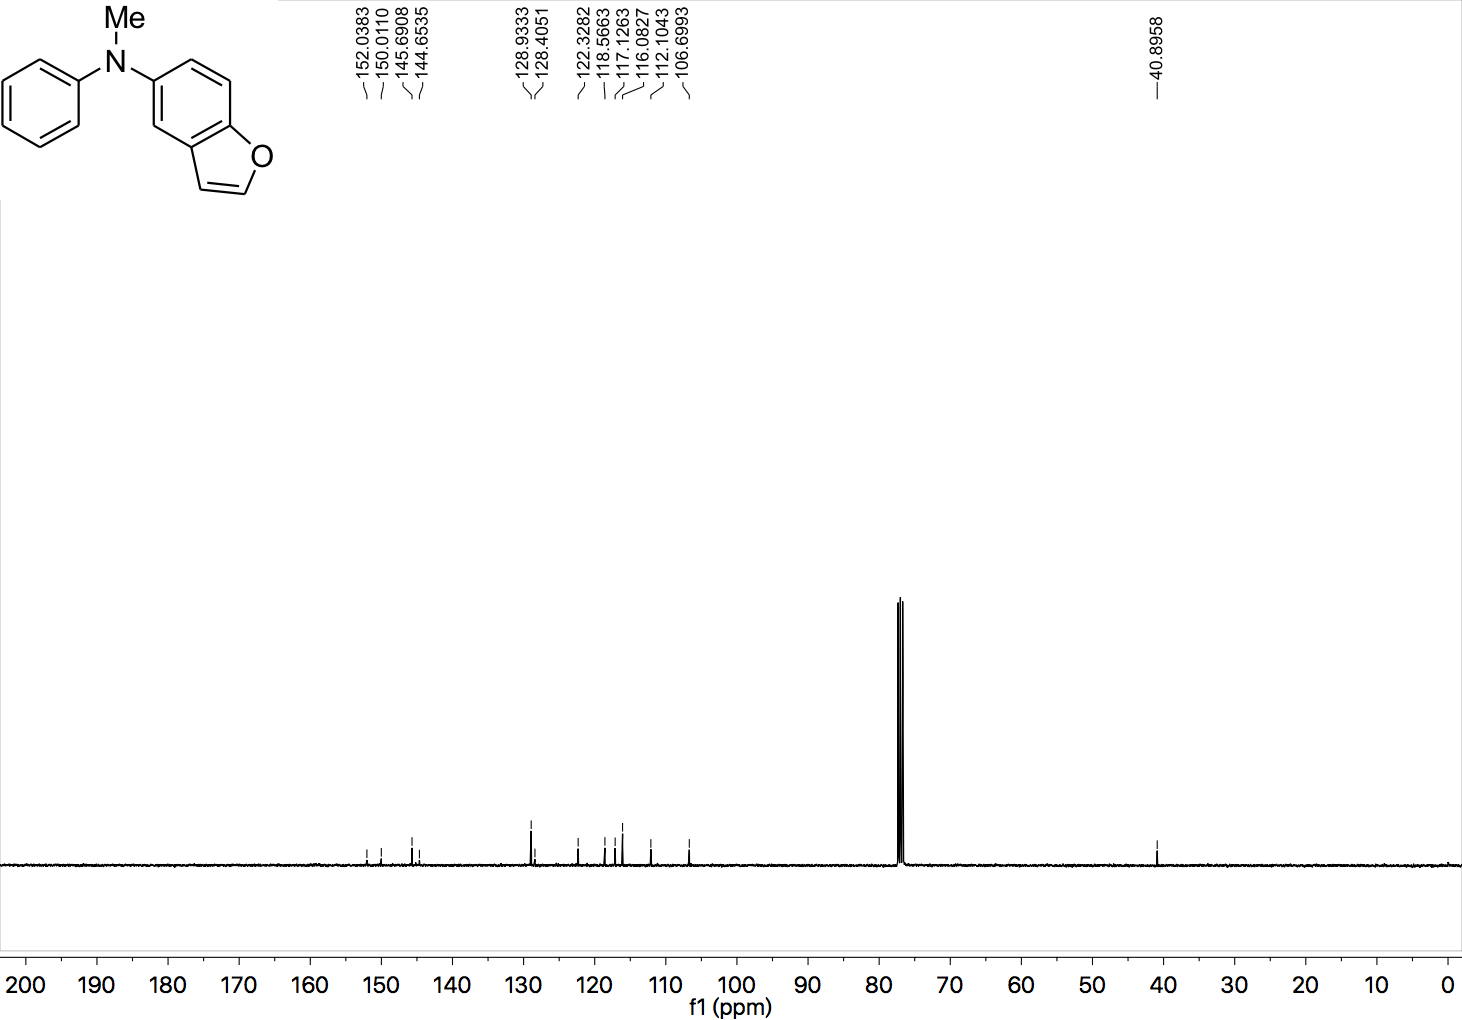


1H NMR (400 MHz, CDCl3) spectrum of **36**.


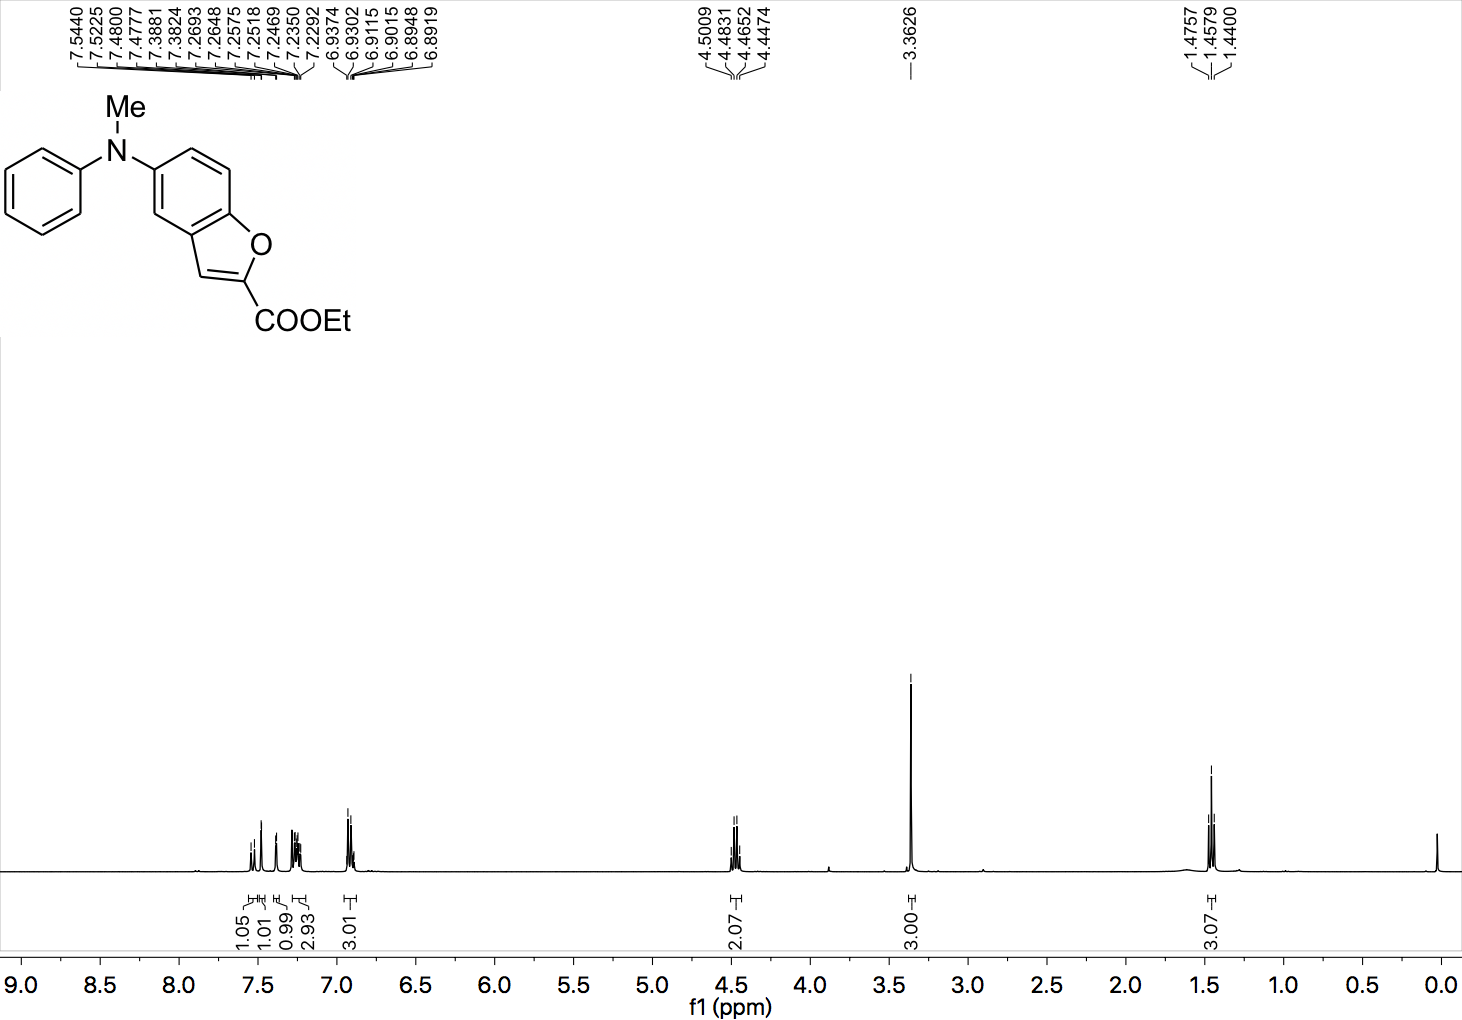


13C NMR (101 MHz, CDCl3) spectrum of **36**.


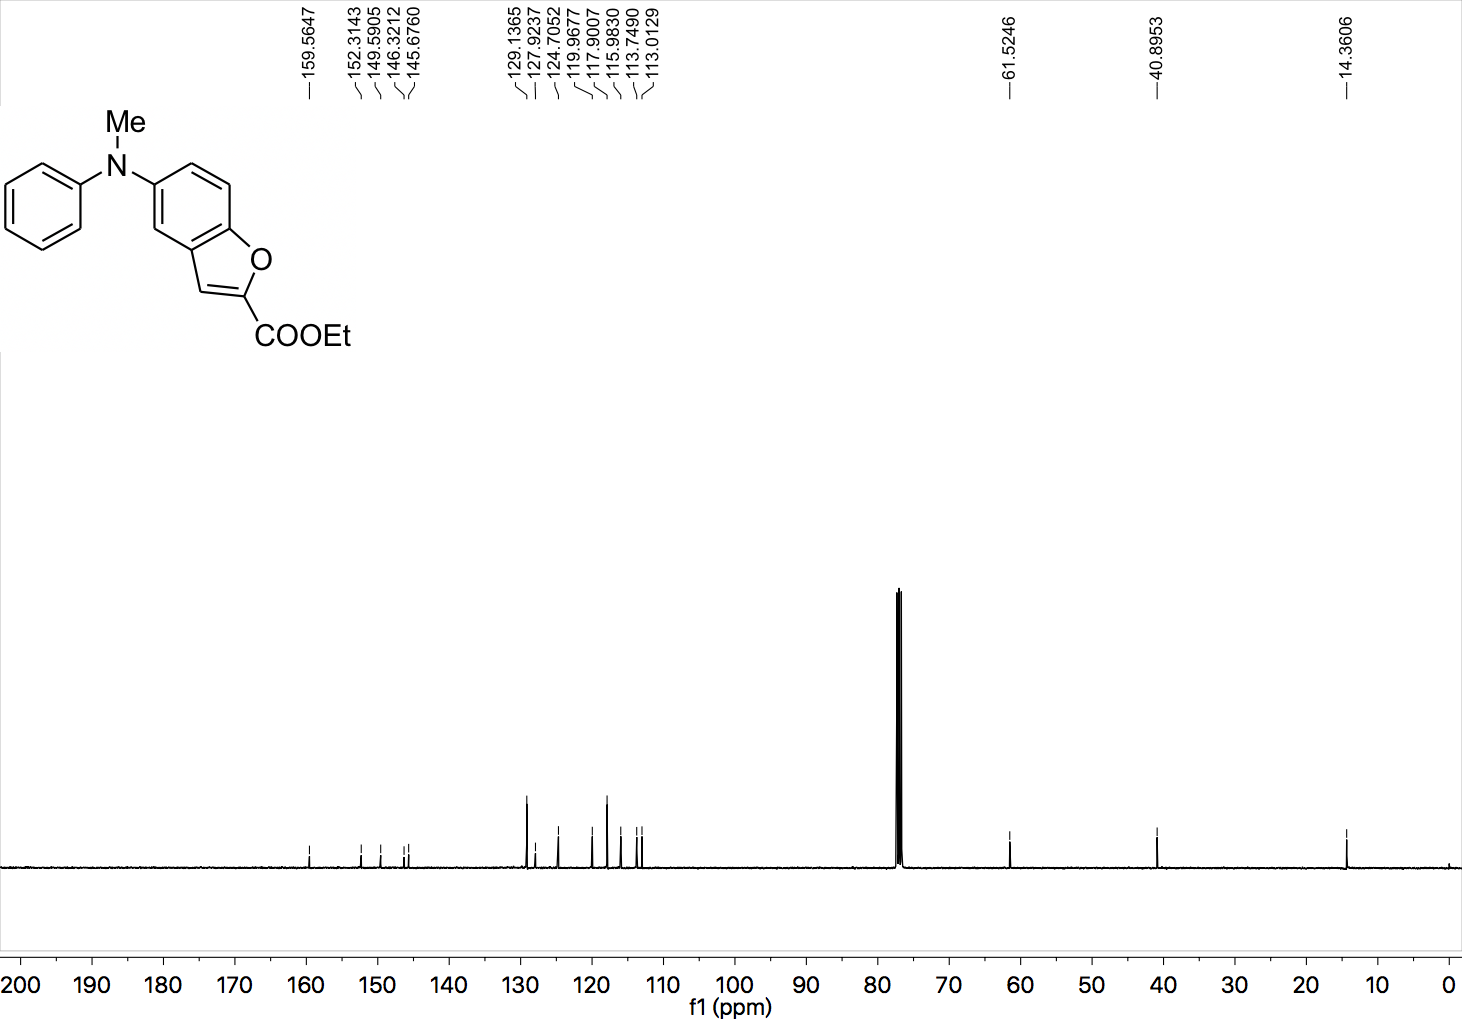


1H NMR (400 MHz, CDCl3) spectrum of **37**.


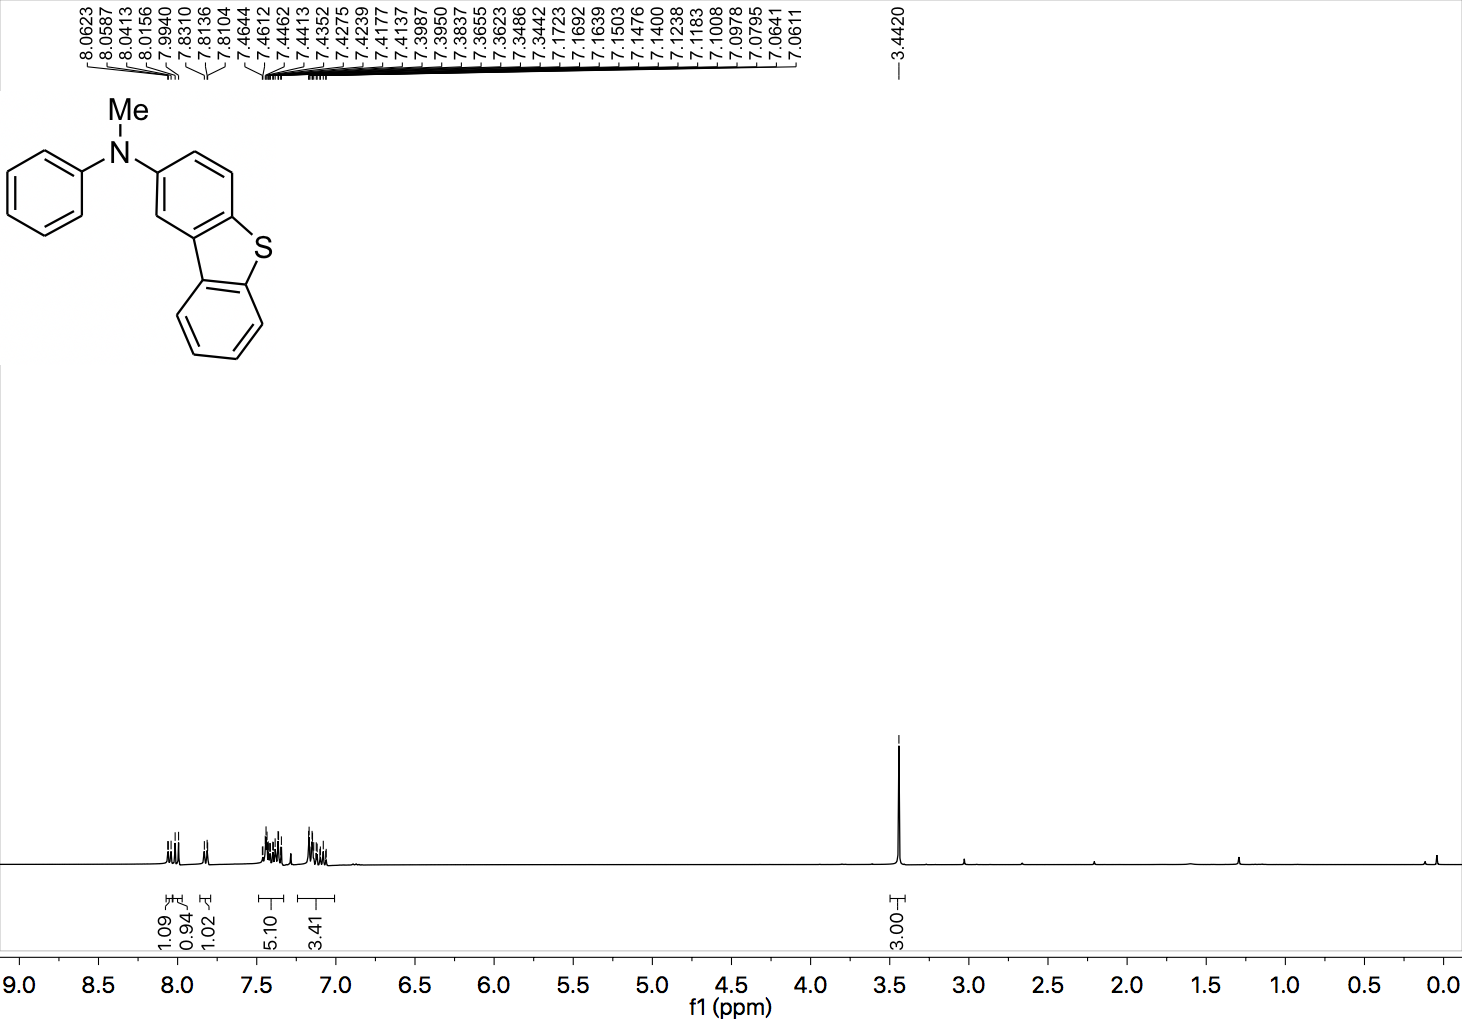


13C NMR (101 MHz, CDCl3) spectrum of **37**.


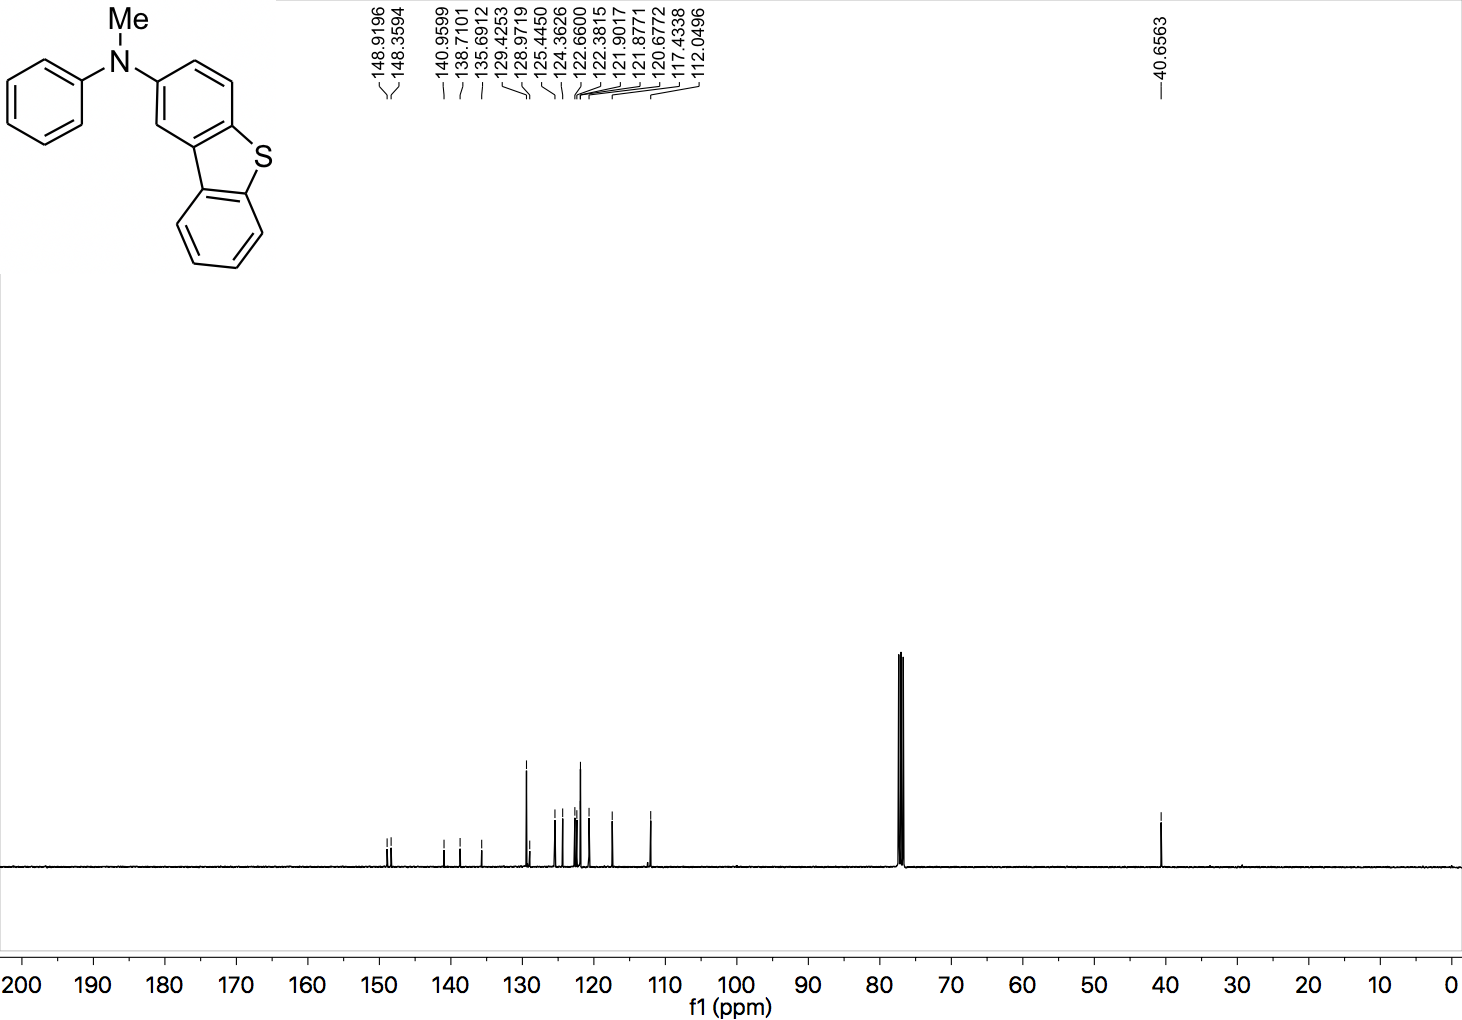


1H NMR (400 MHz, CDCl3) spectrum of **38**.


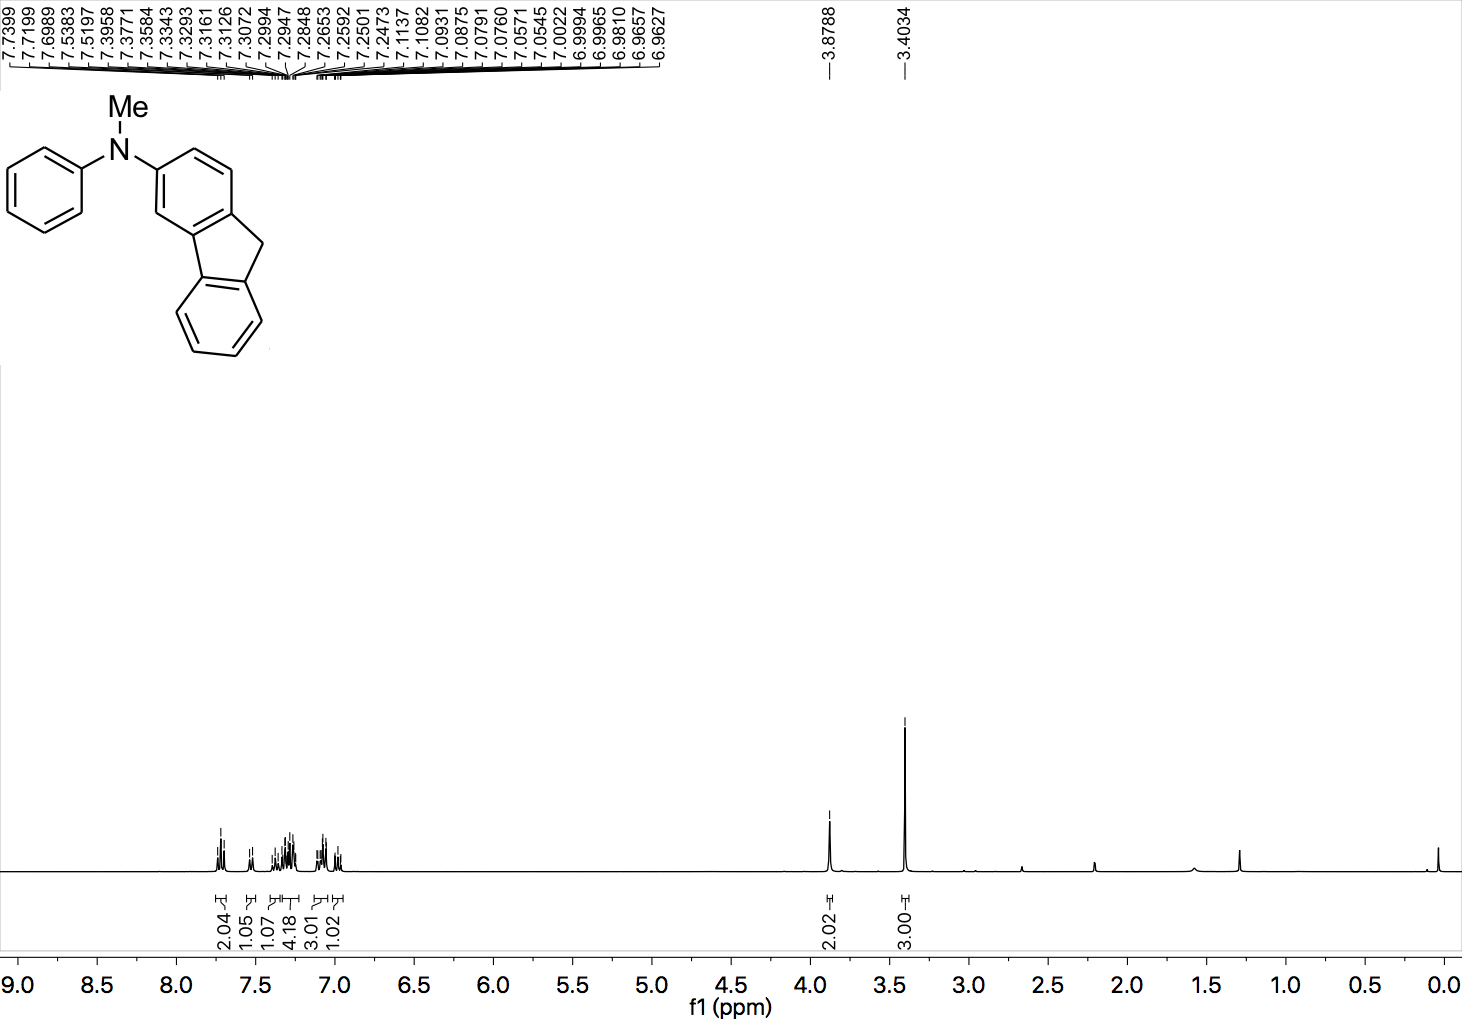


13C NMR (101 MHz, CDCl3) spectrum of **38**.


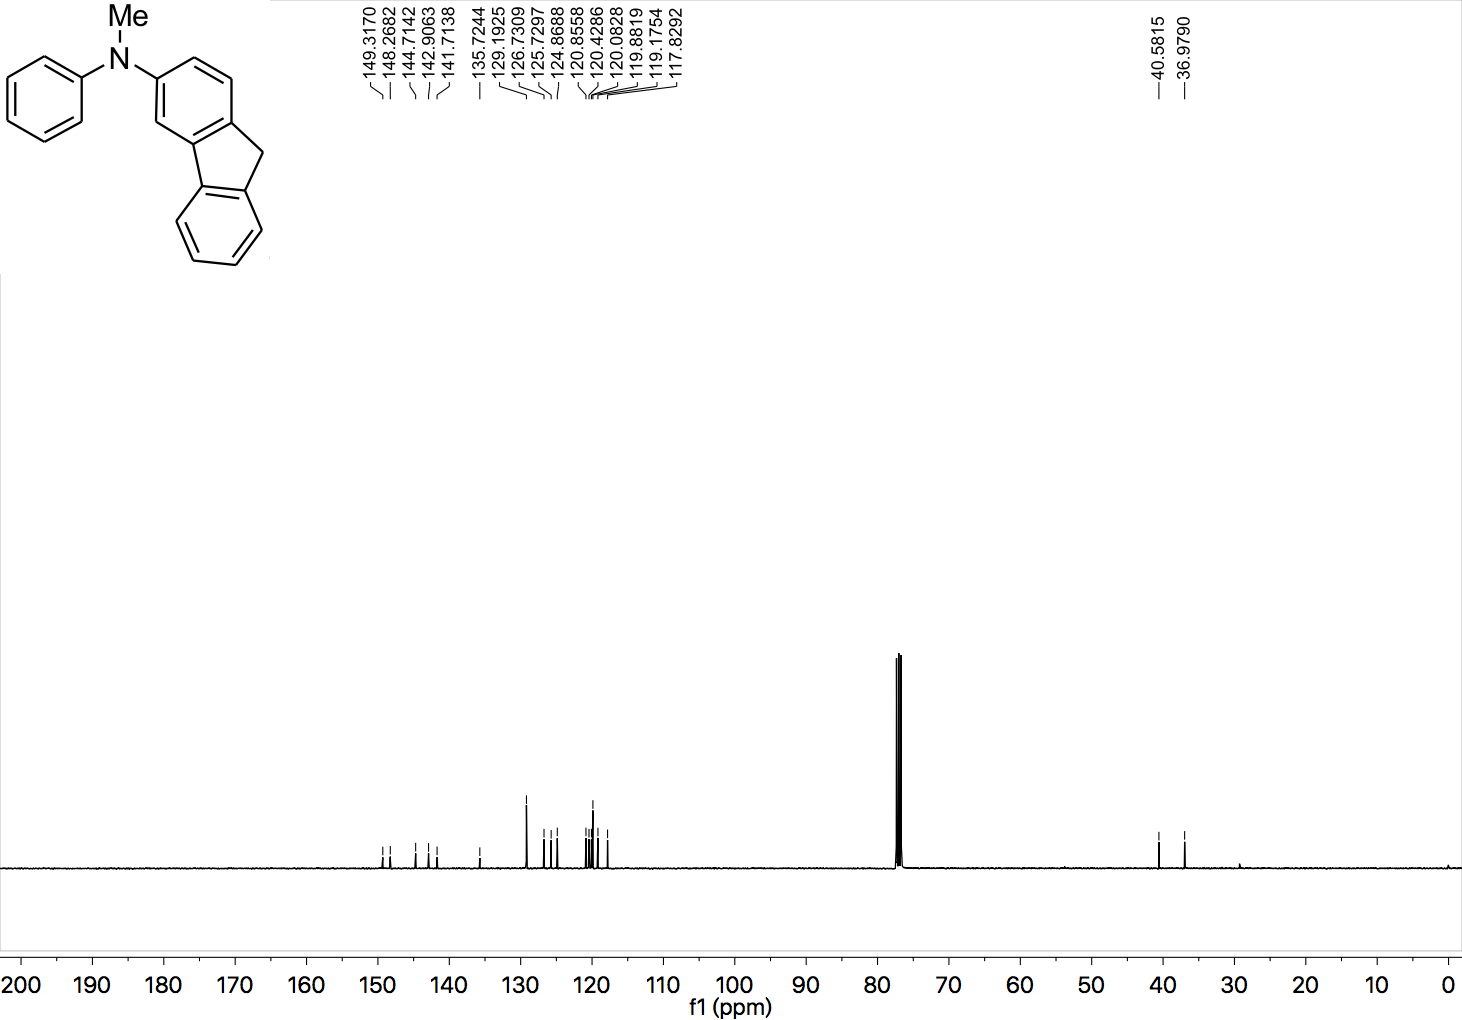


1H NMR (400 MHz, CDCl3) spectrum of **39**.


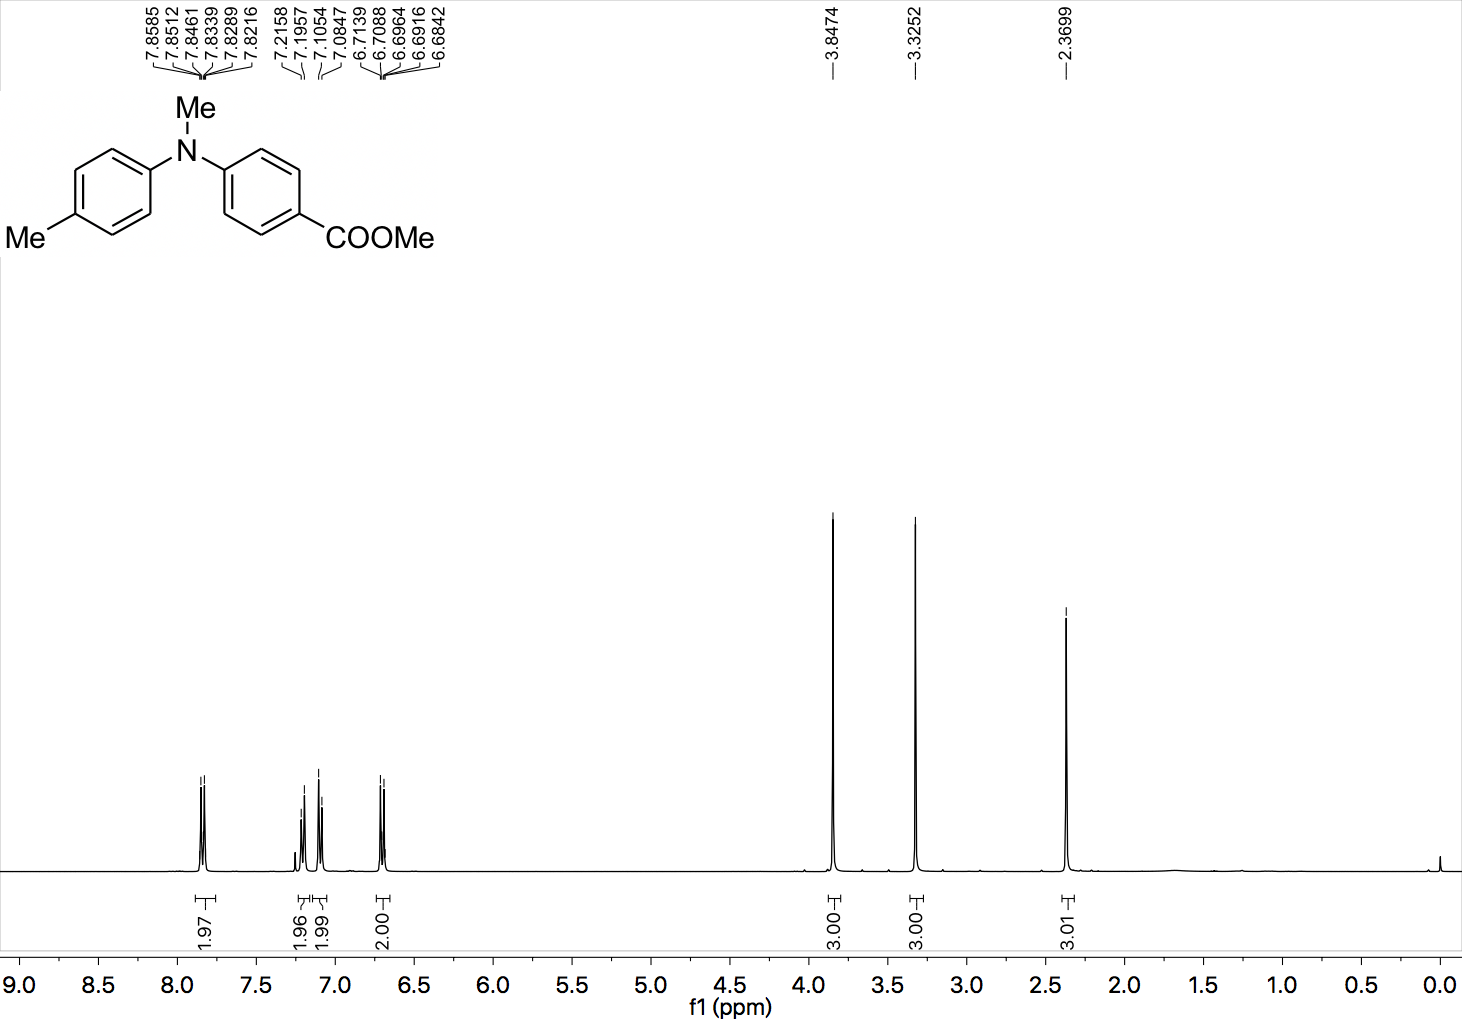


13C NMR (101 MHz, CDCl3) spectrum of **39**.


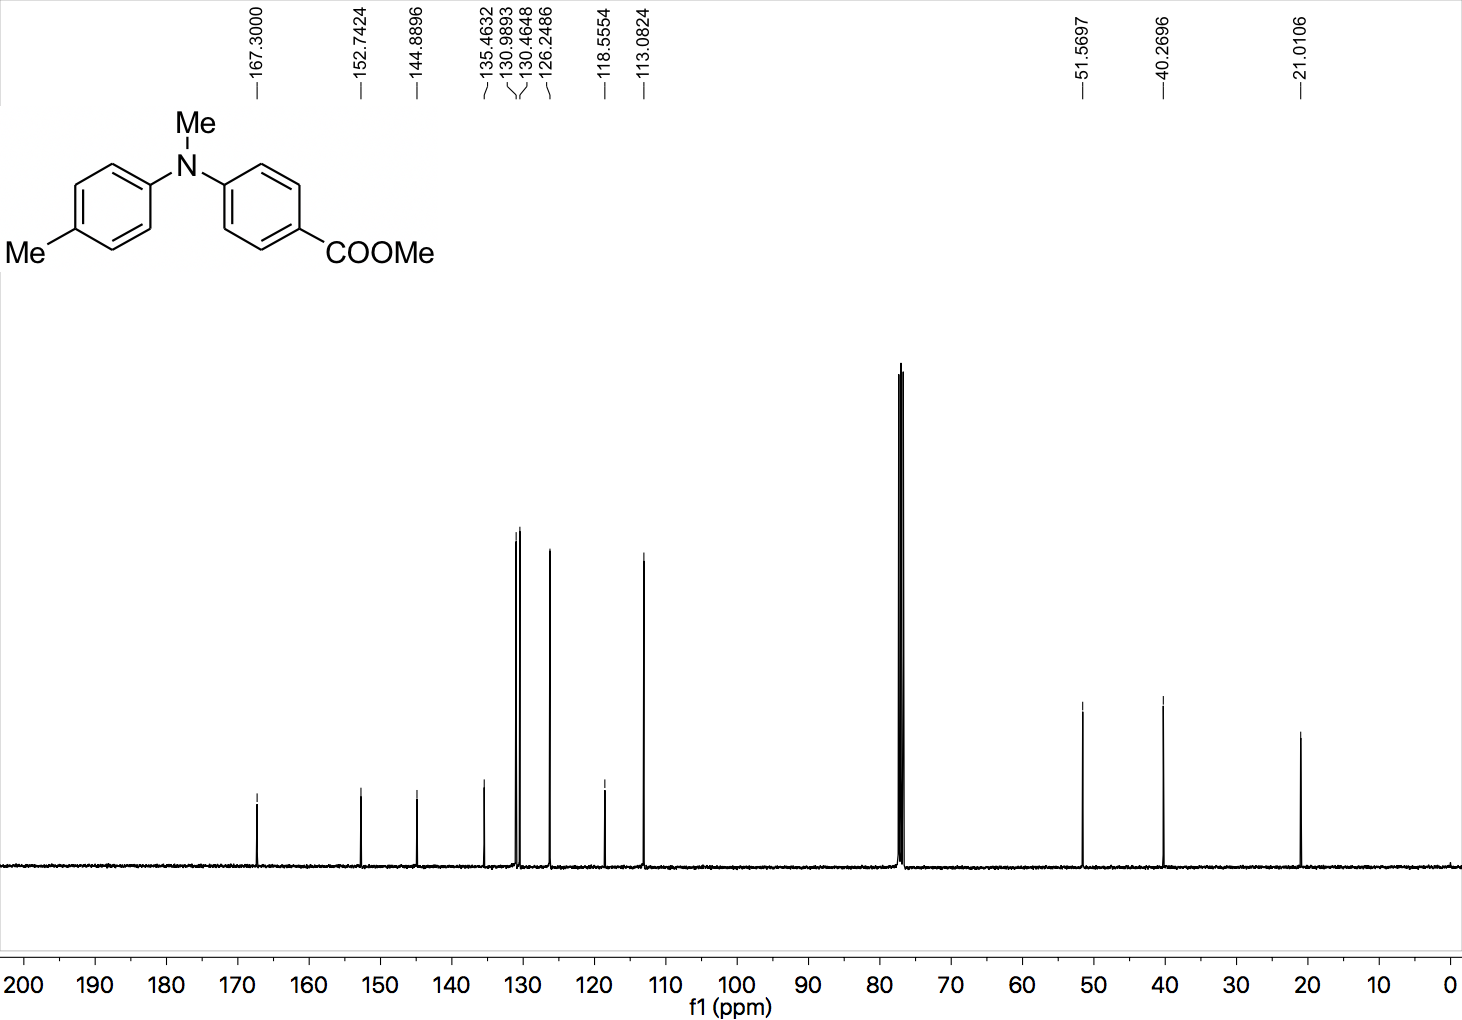


1H NMR (400 MHz, CDCl3) spectrum of **40**.


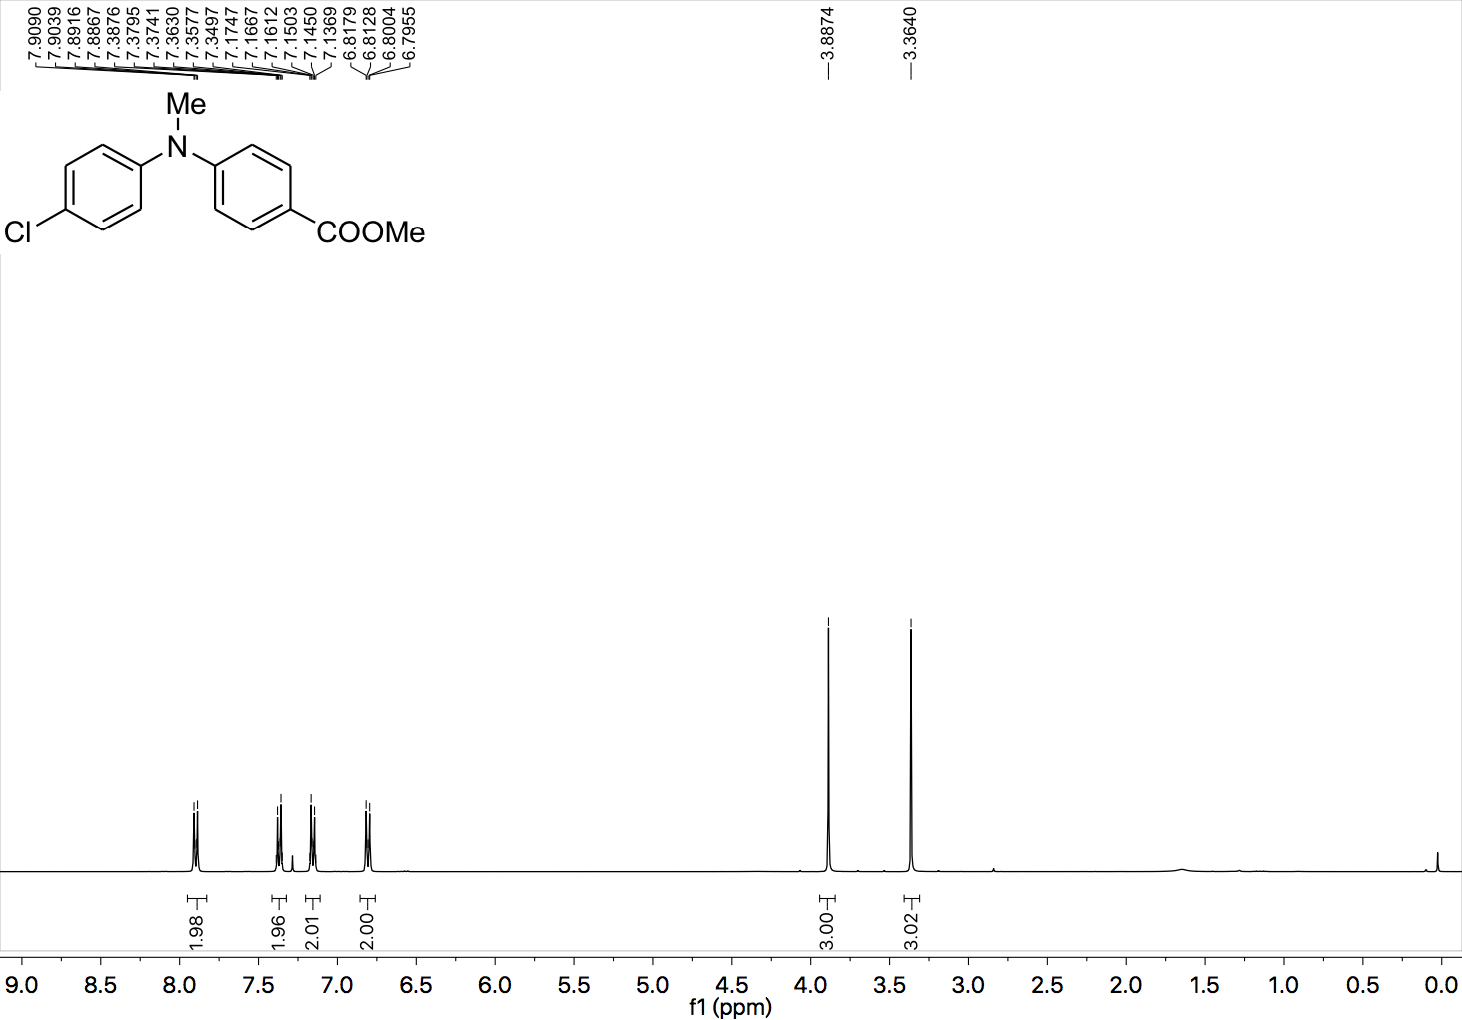


13C NMR (101 MHz, CDCl3) spectrum of **40**.


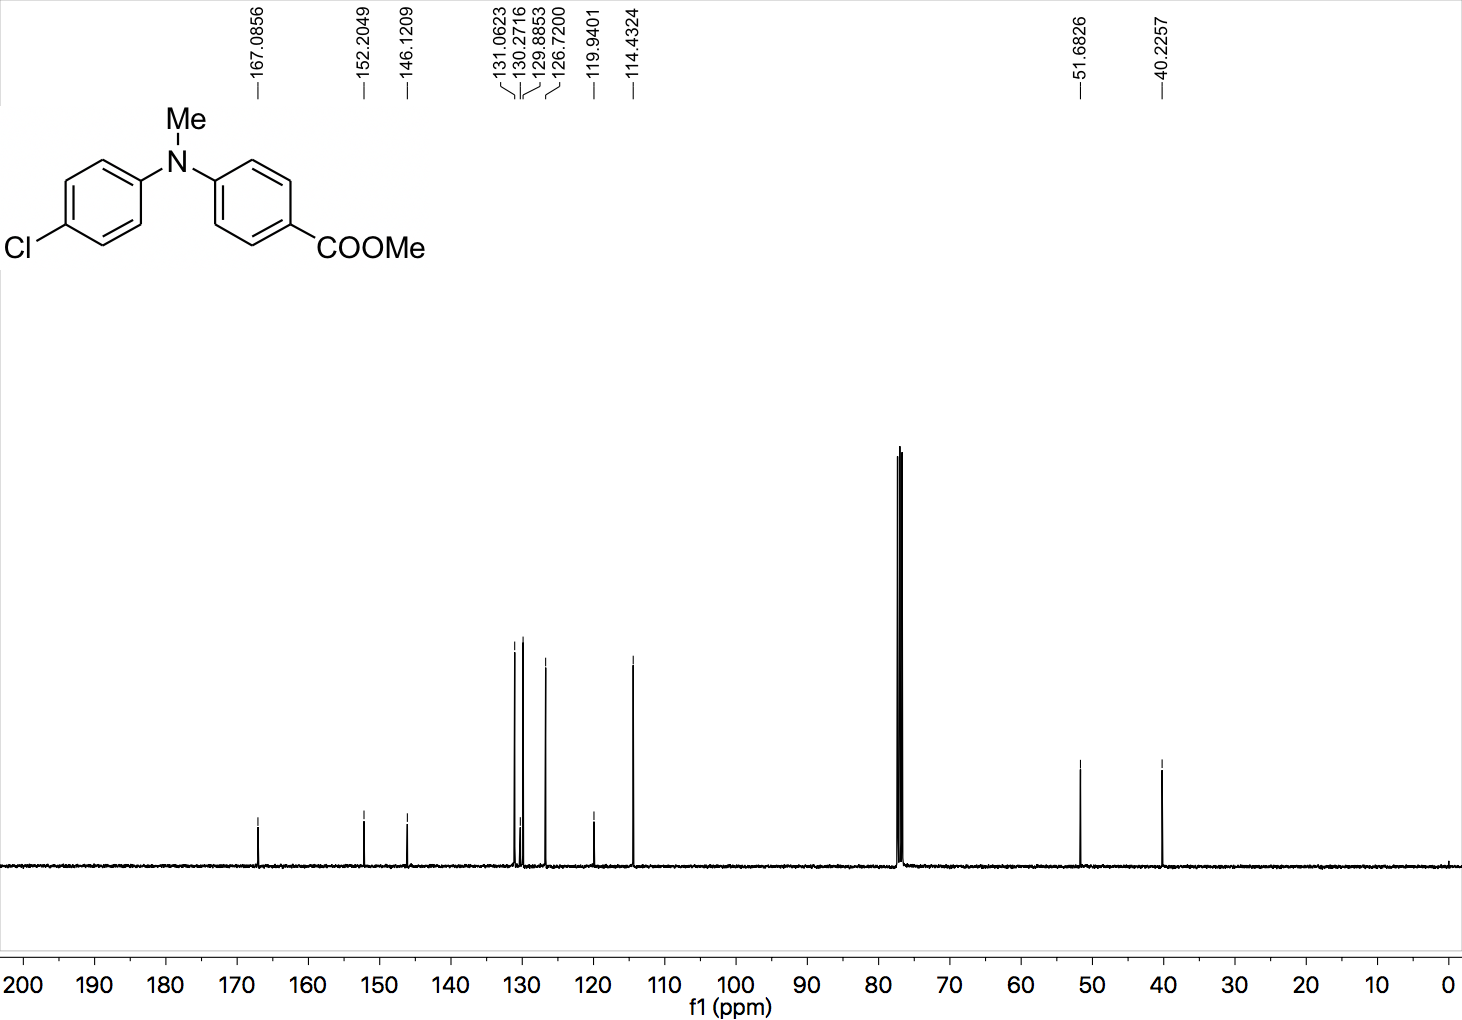


1H NMR (400 MHz, CDCl3) spectrum of **41**.


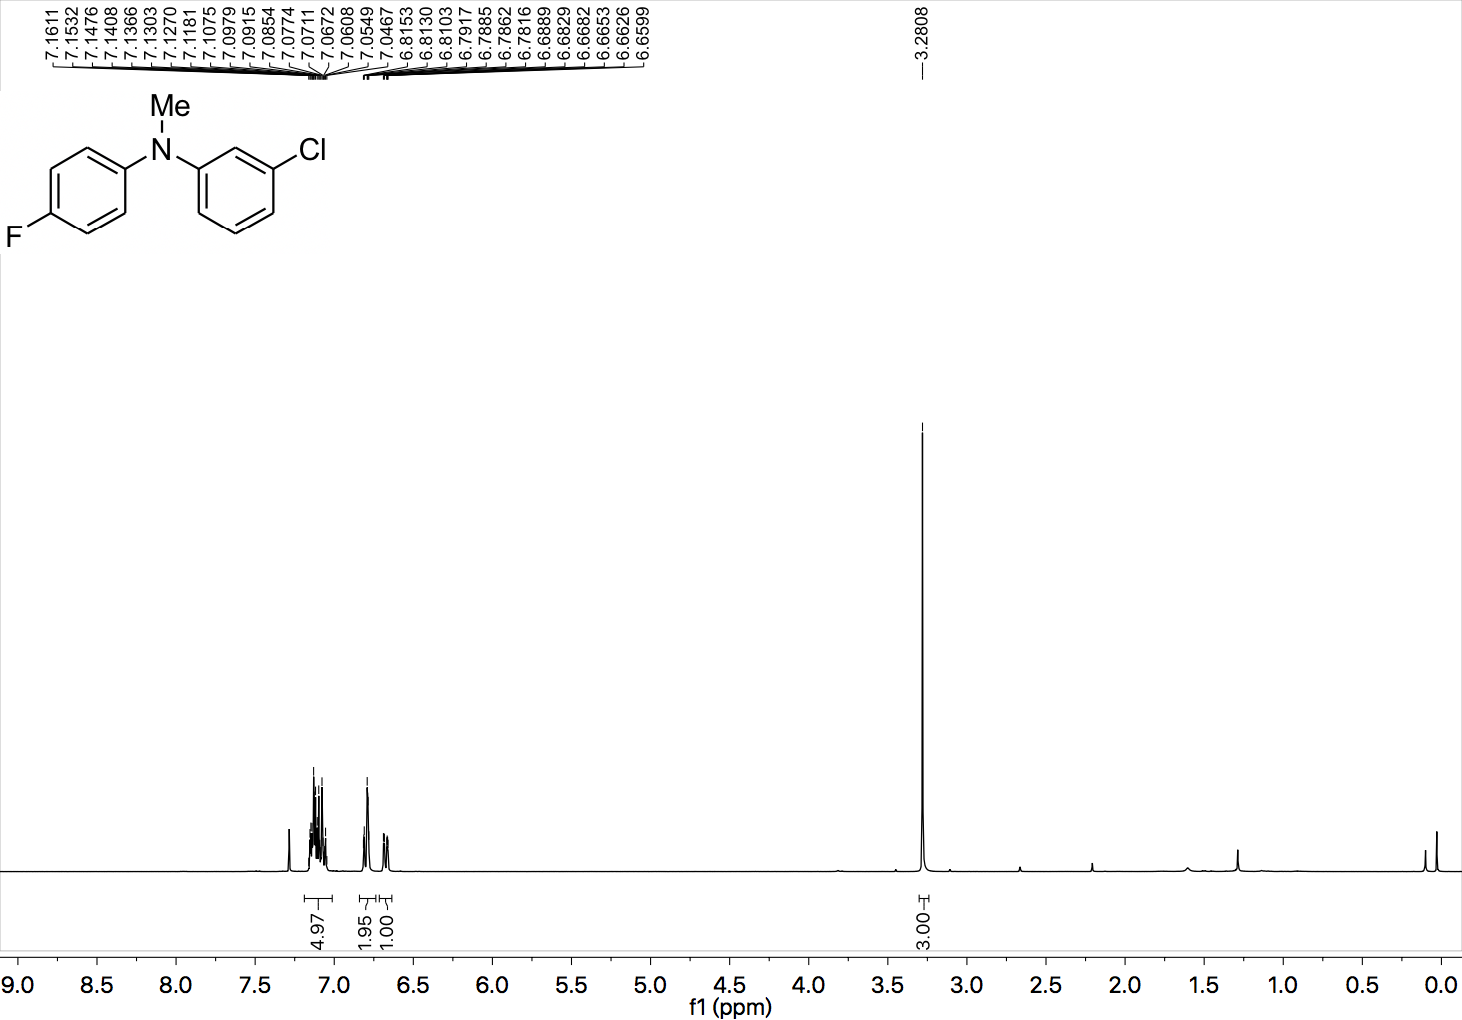


13C NMR (101 MHz, CDCl3) spectrum of **41**.


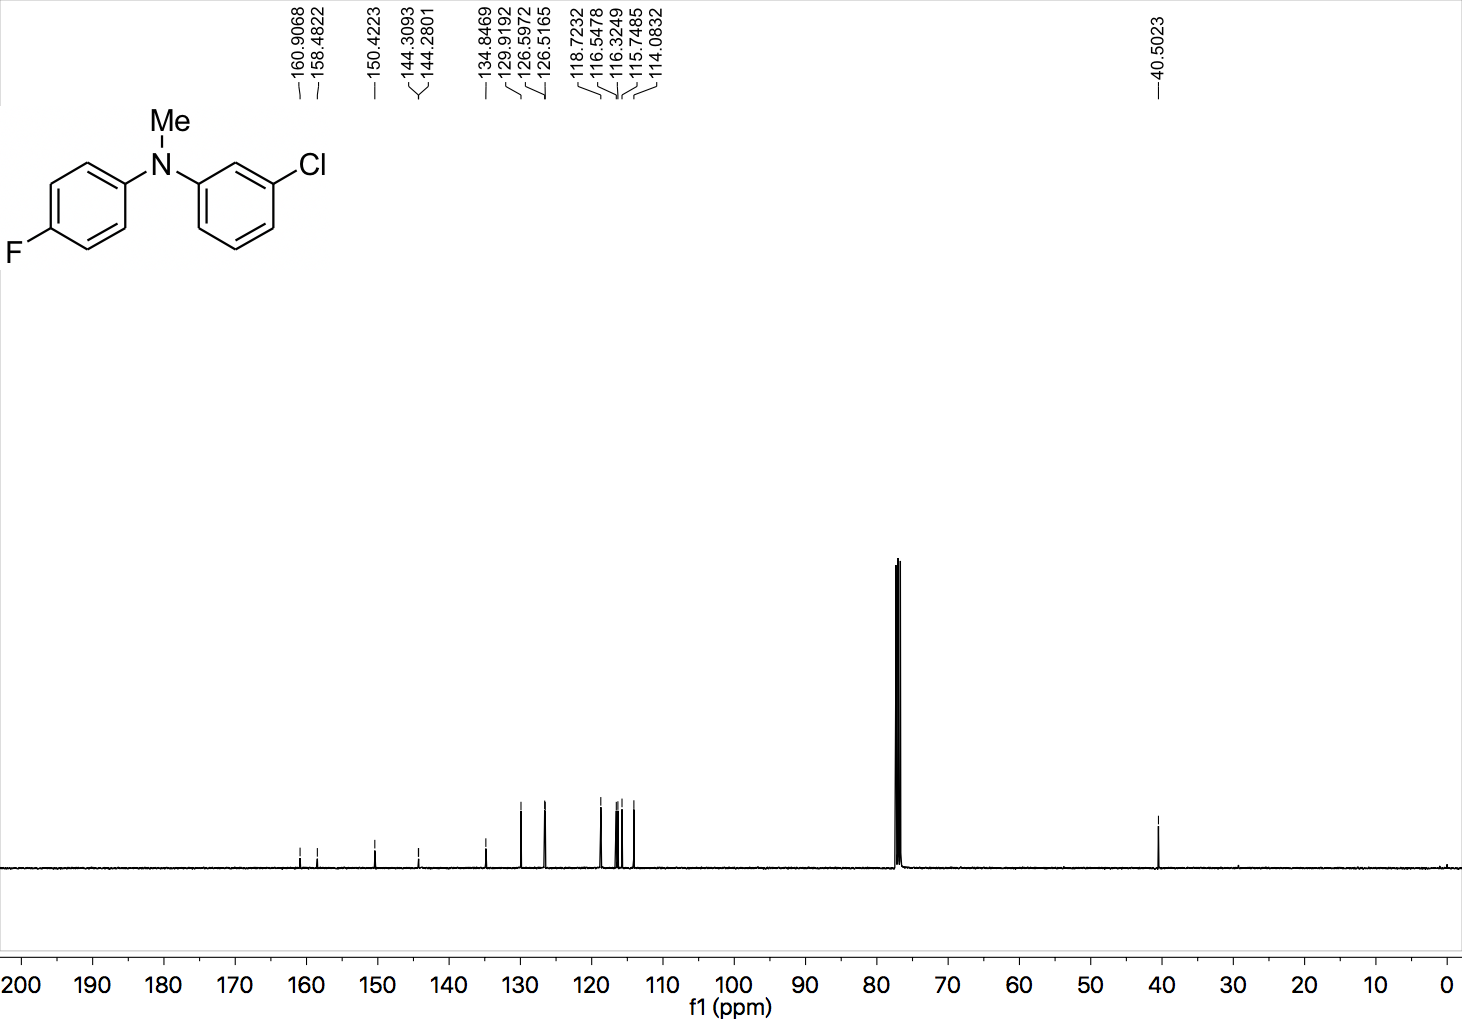


19F NMR (377 MHz, CDCl3) spectrum of **41**.


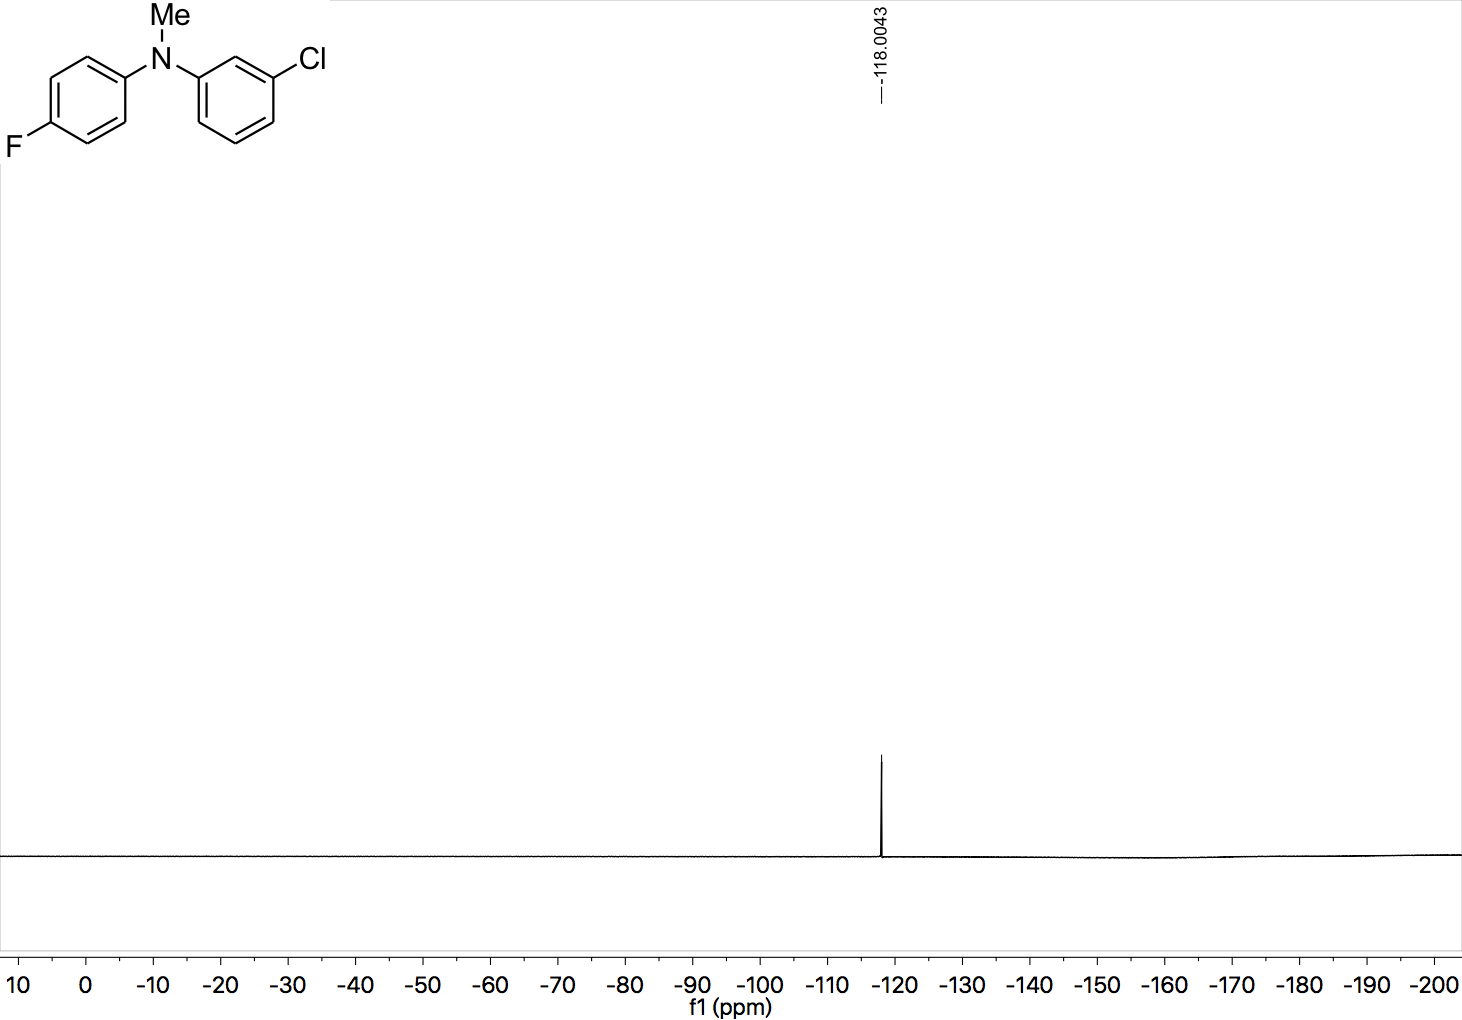


1H NMR (400 MHz, CDCl3) spectrum of **42**.


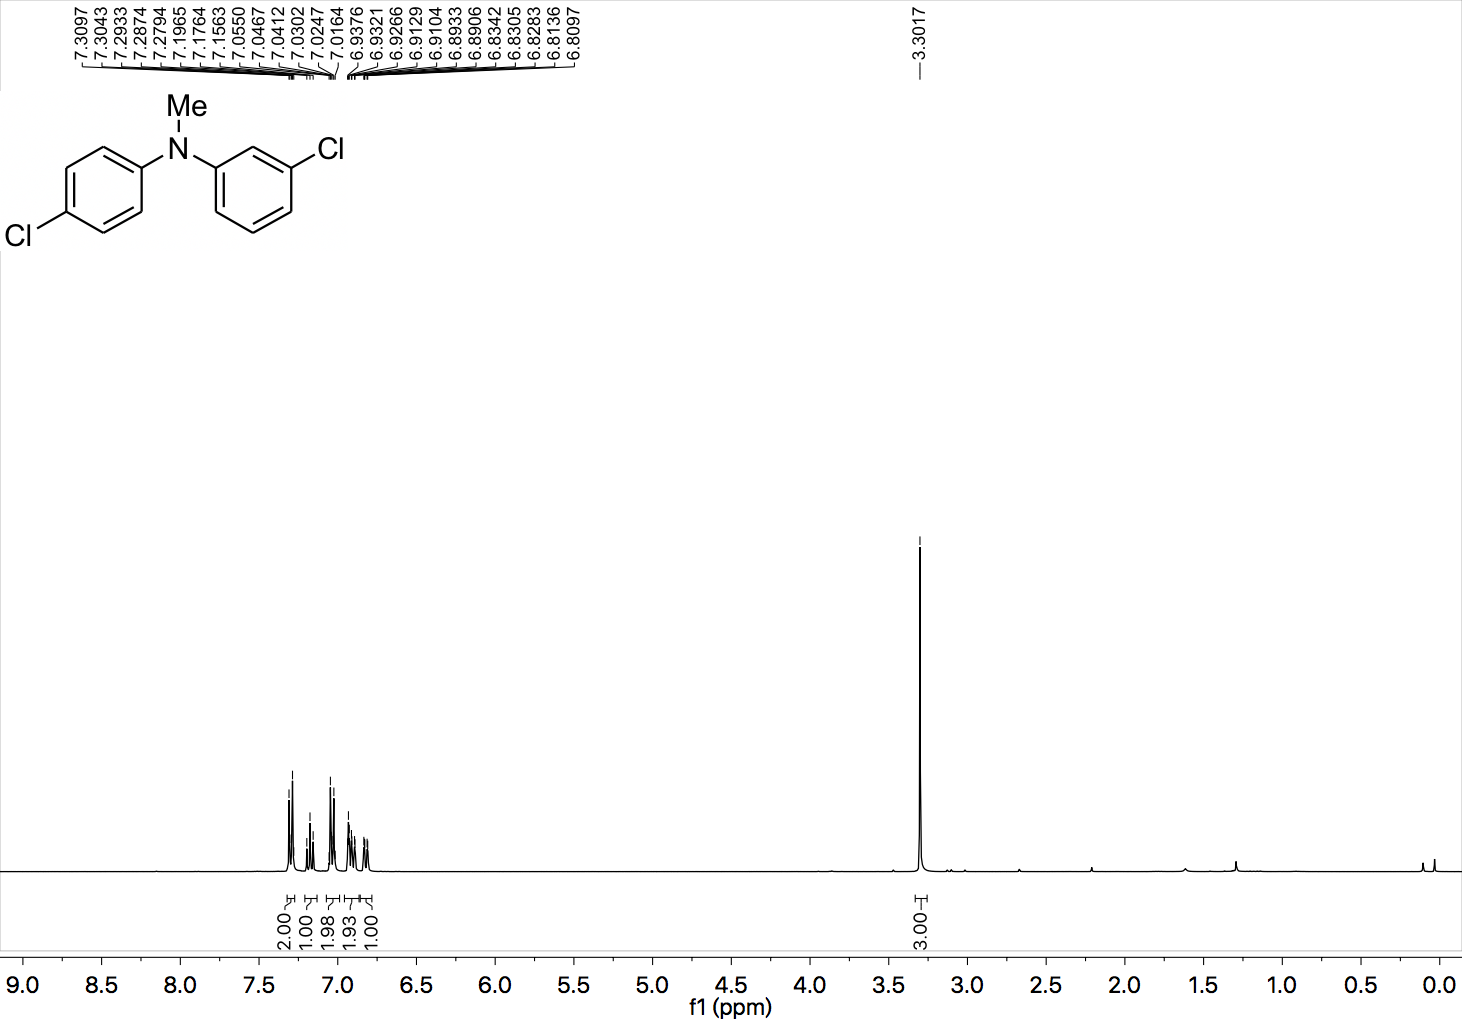


13C NMR (101 MHz, CDCl3) spectrum of **42**.


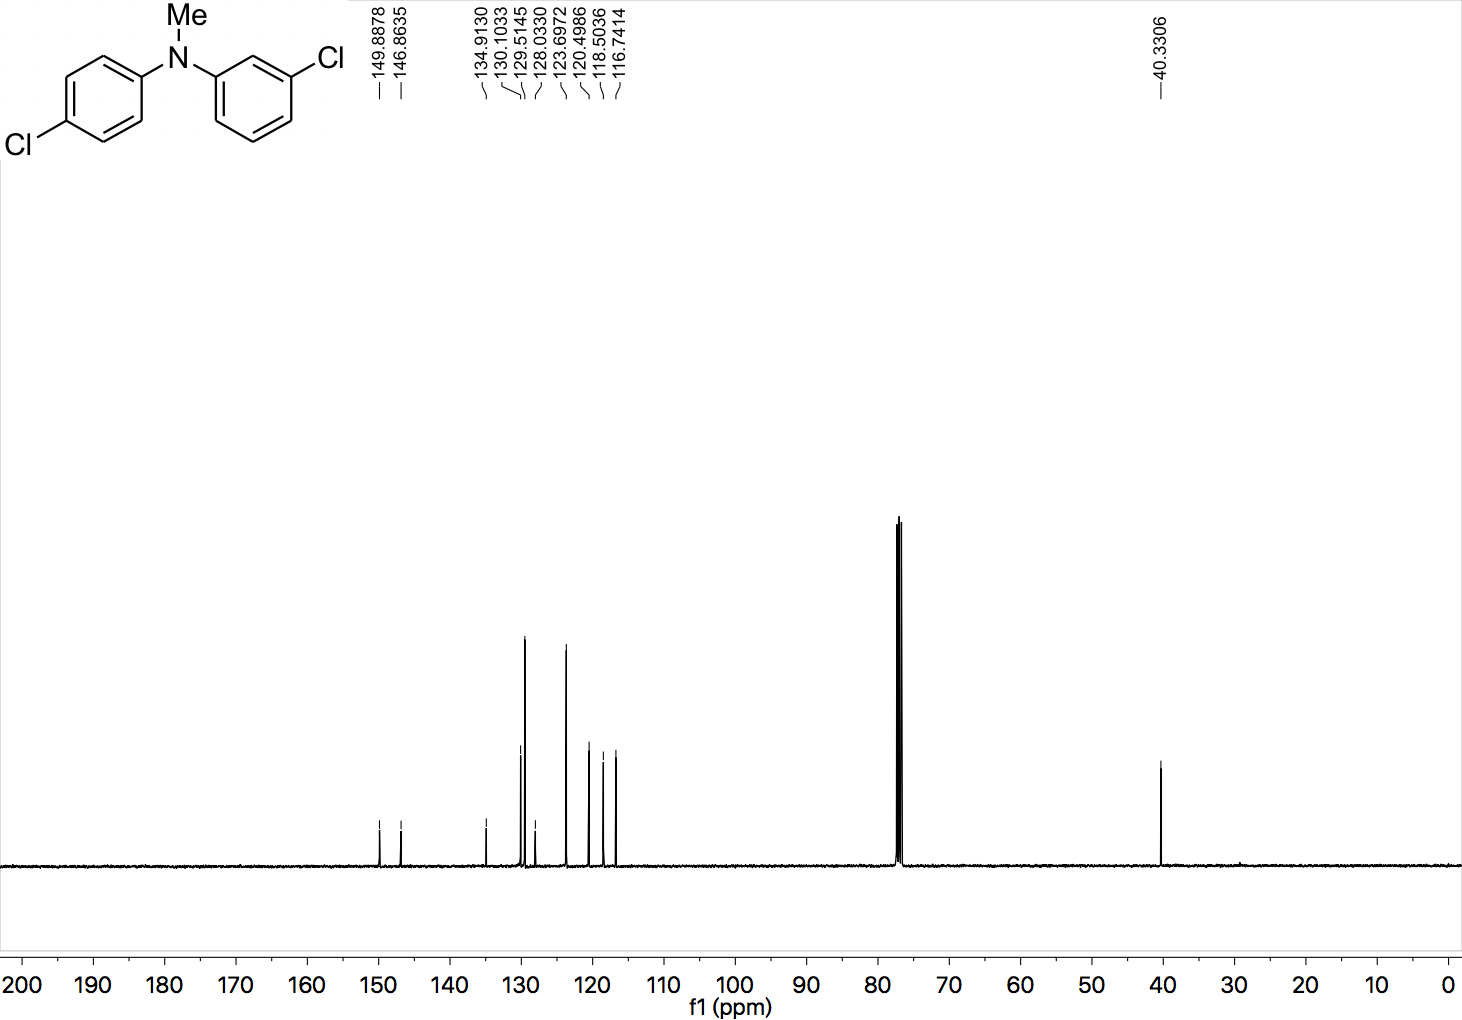


1H NMR (400 MHz, CDCl3) spectrum of **43**.


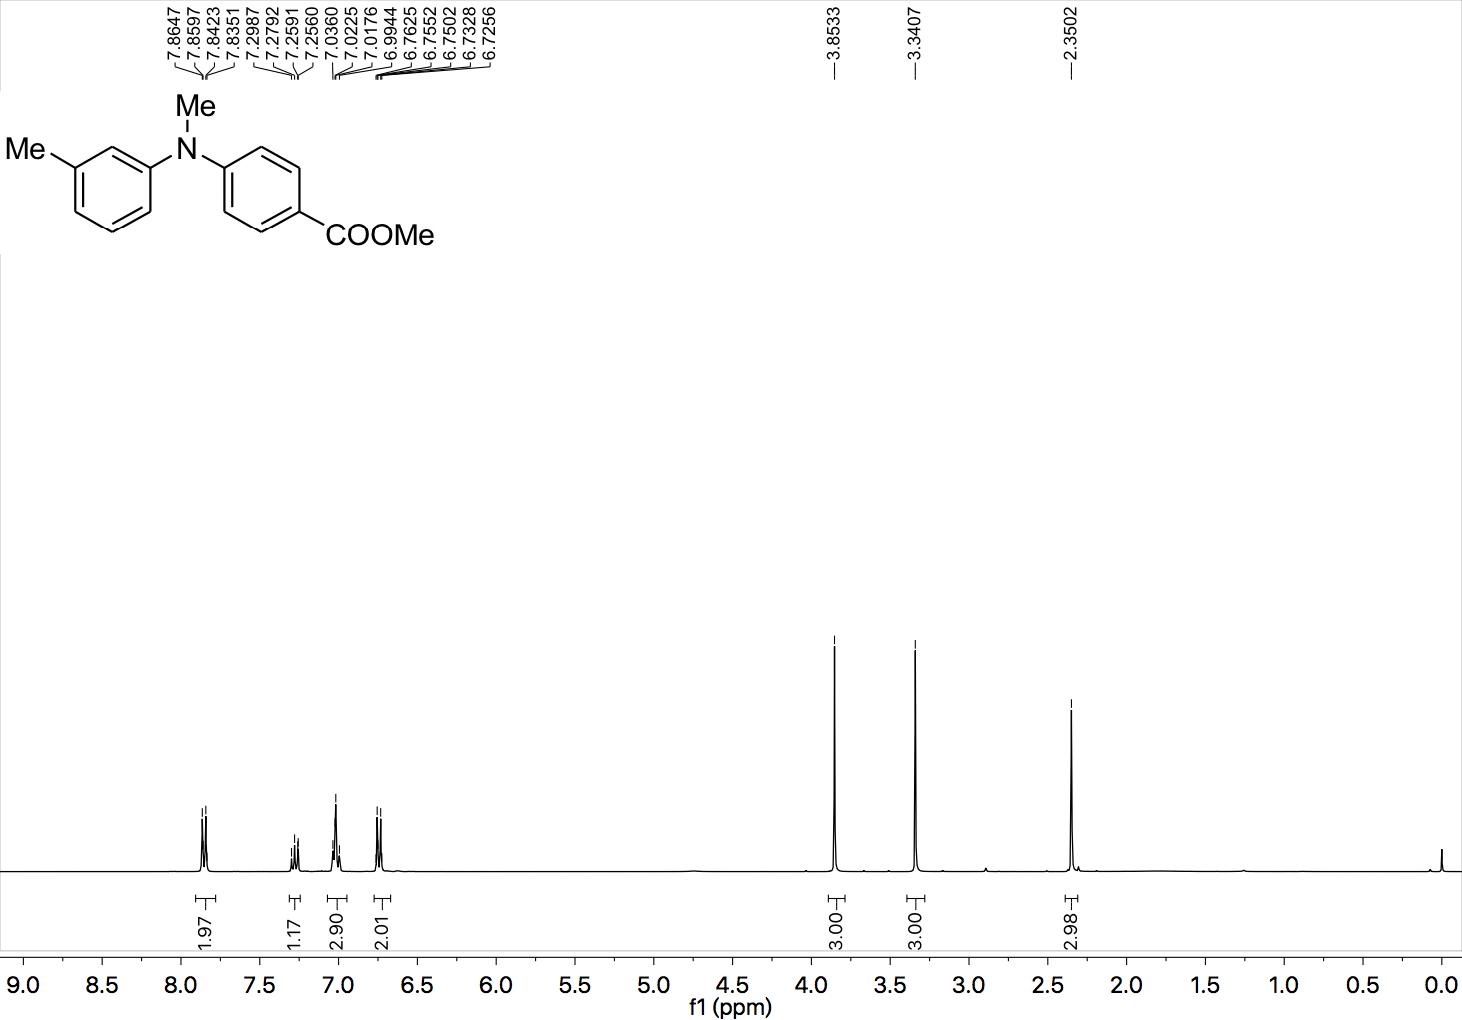


13C NMR (101 MHz, CDCl3) spectrum of **43**.


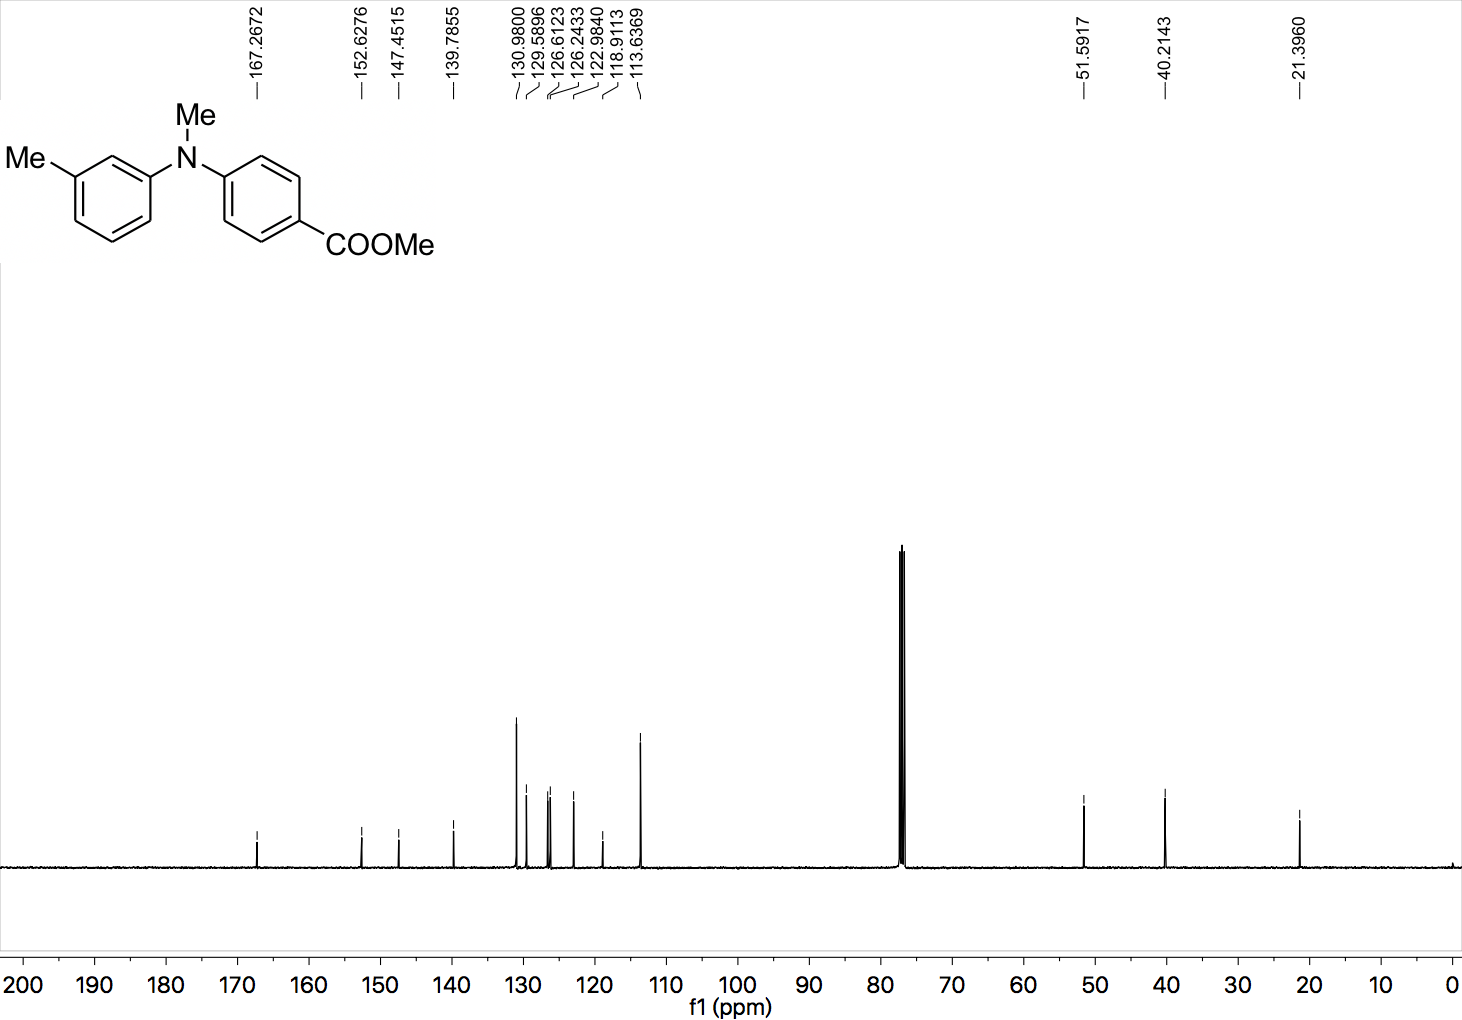


1H NMR (400 MHz, CDCl3) spectrum of **44**.


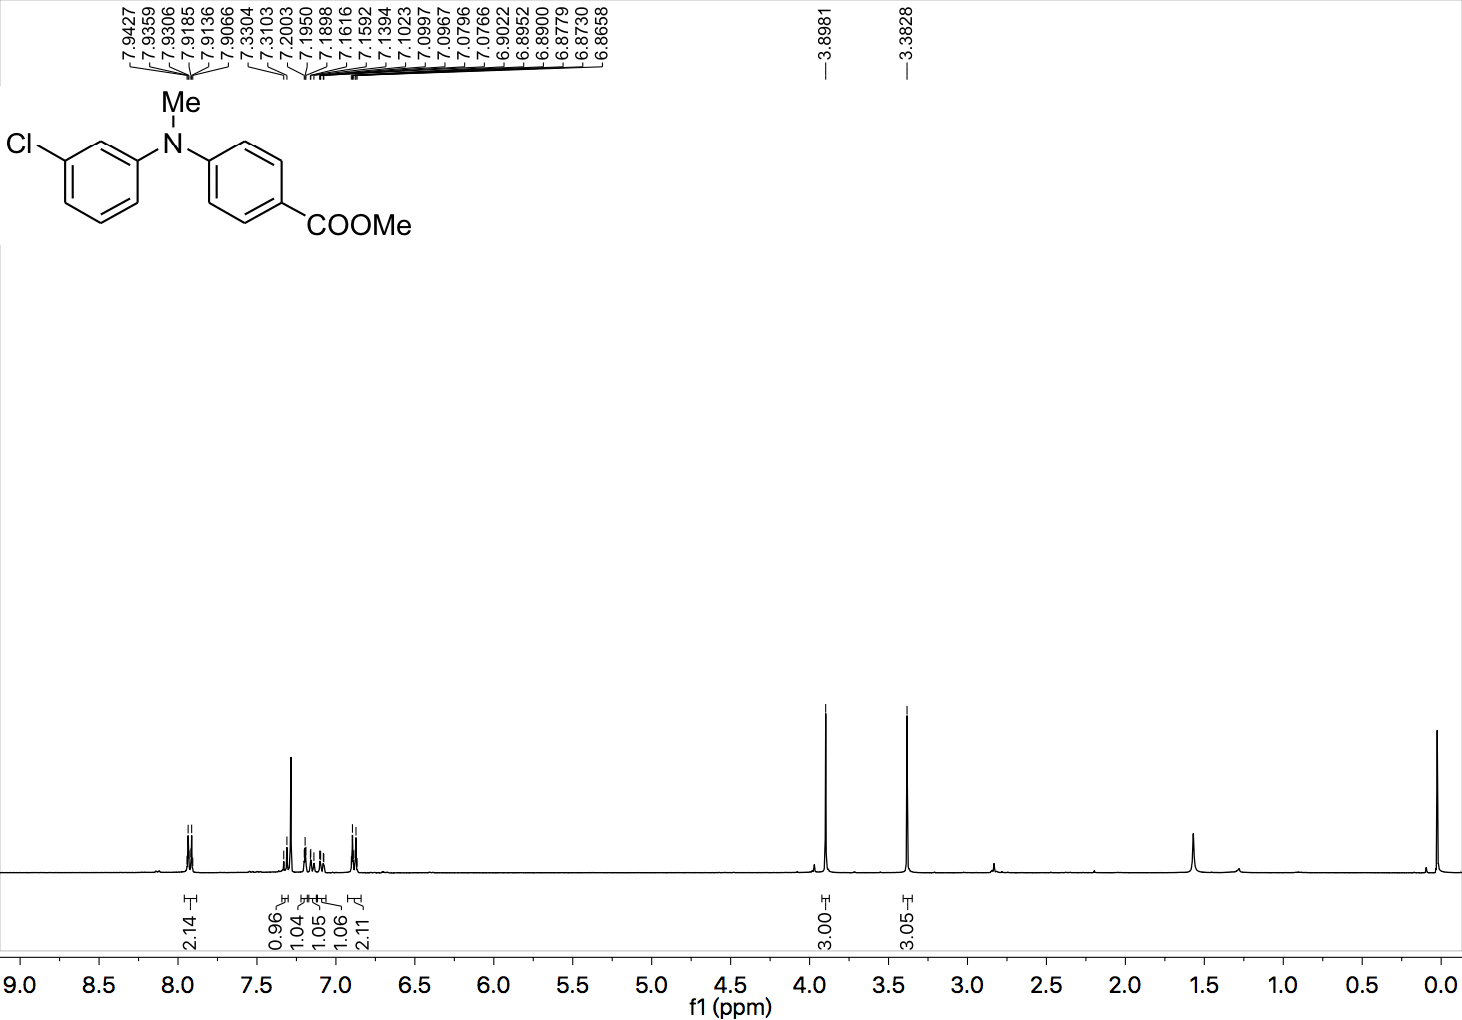


13C NMR (101 MHz, CDCl3) spectrum of **44**.


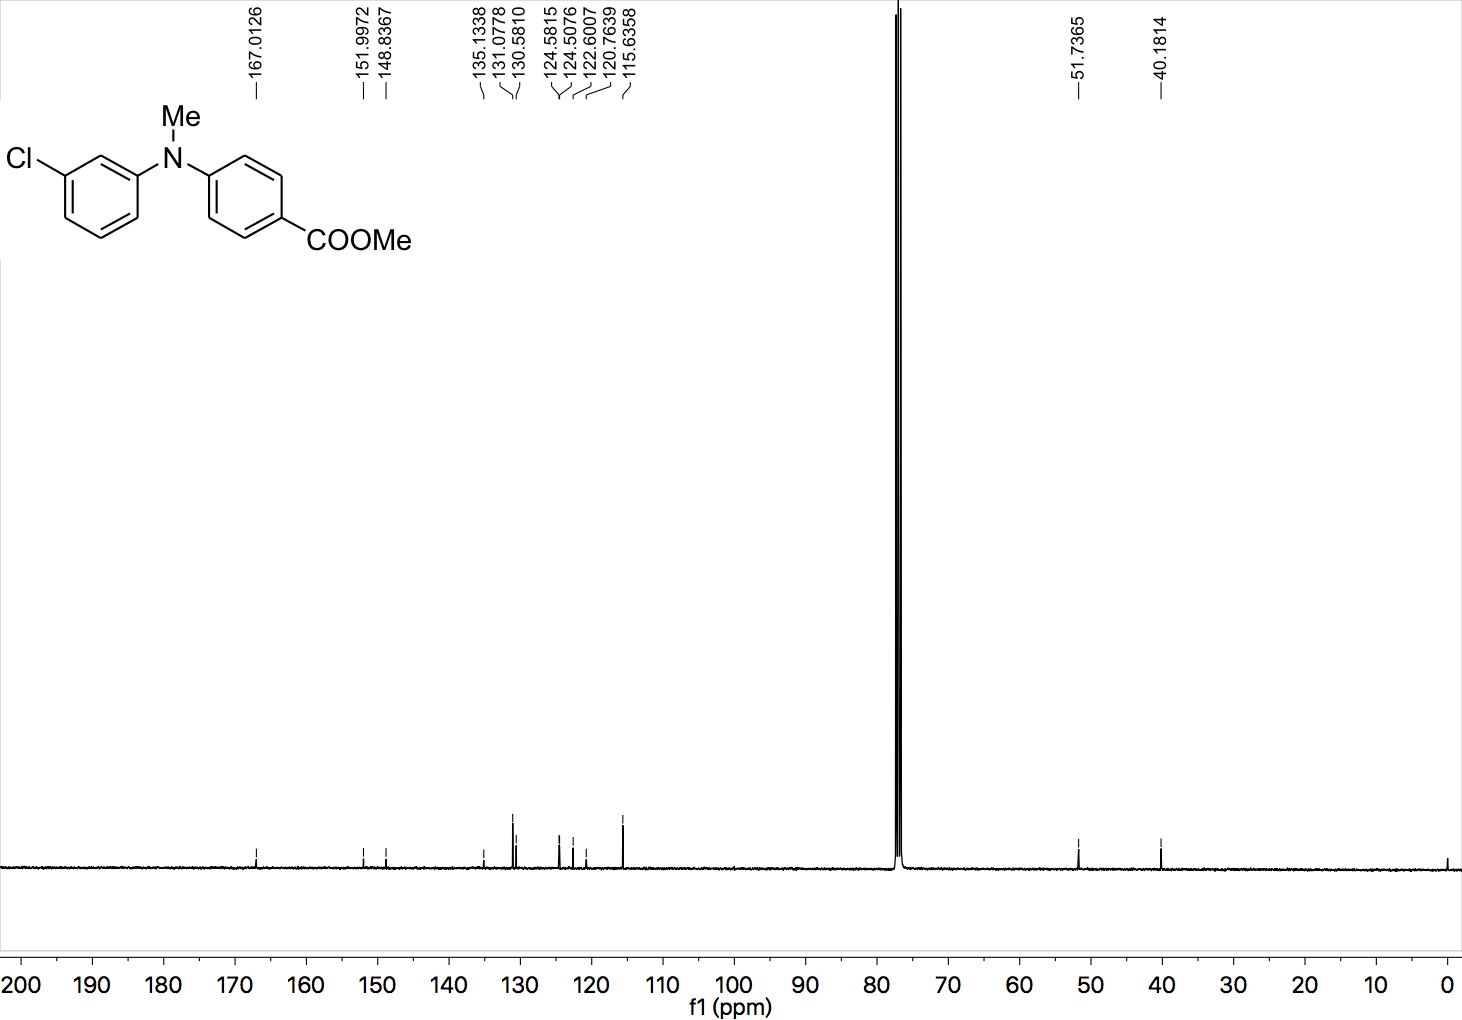


1H NMR (400 MHz, CDCl3) spectrum of **45**.


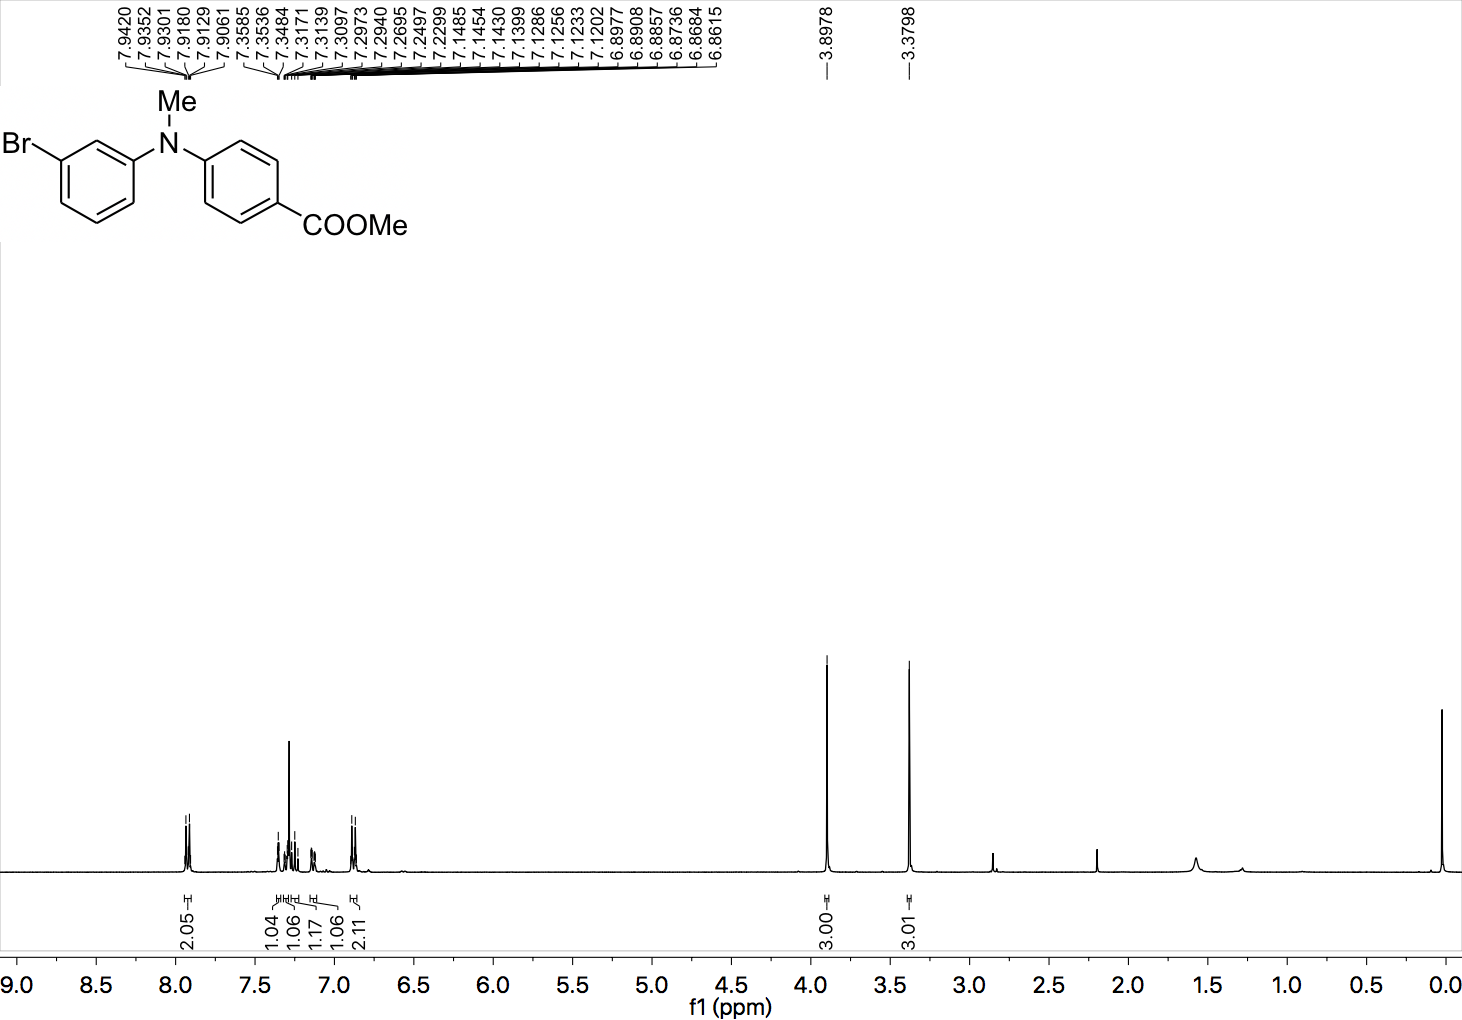


13C NMR (101 MHz, CDCl3) spectrum of **45**.


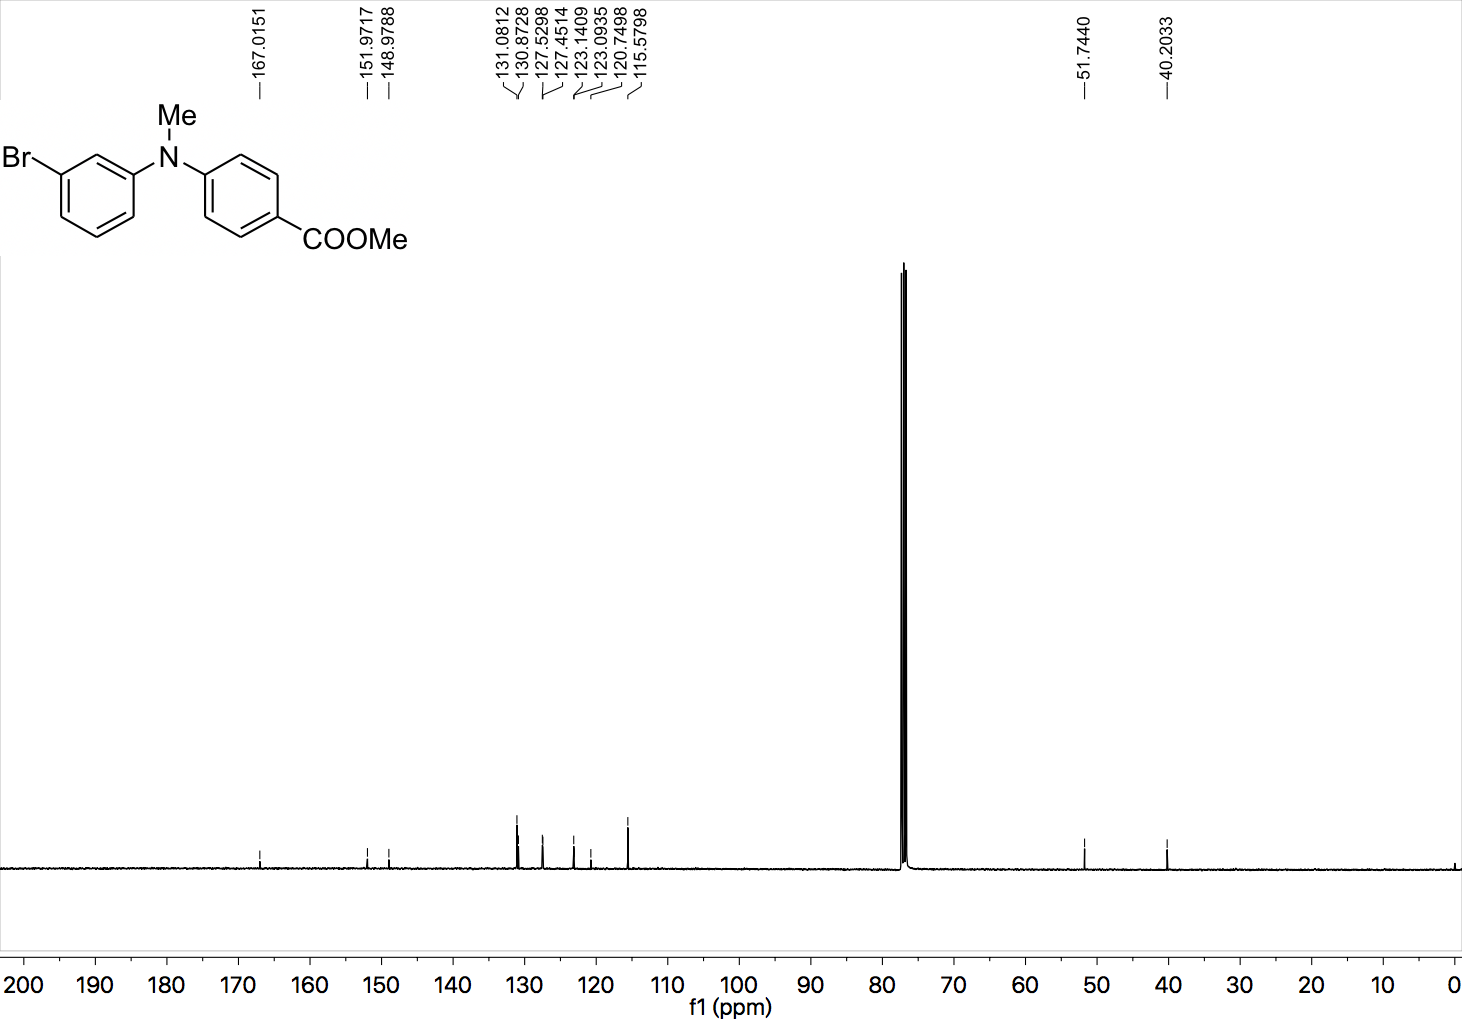


1H NMR (400 MHz, CDCl3) spectrum of **46**.


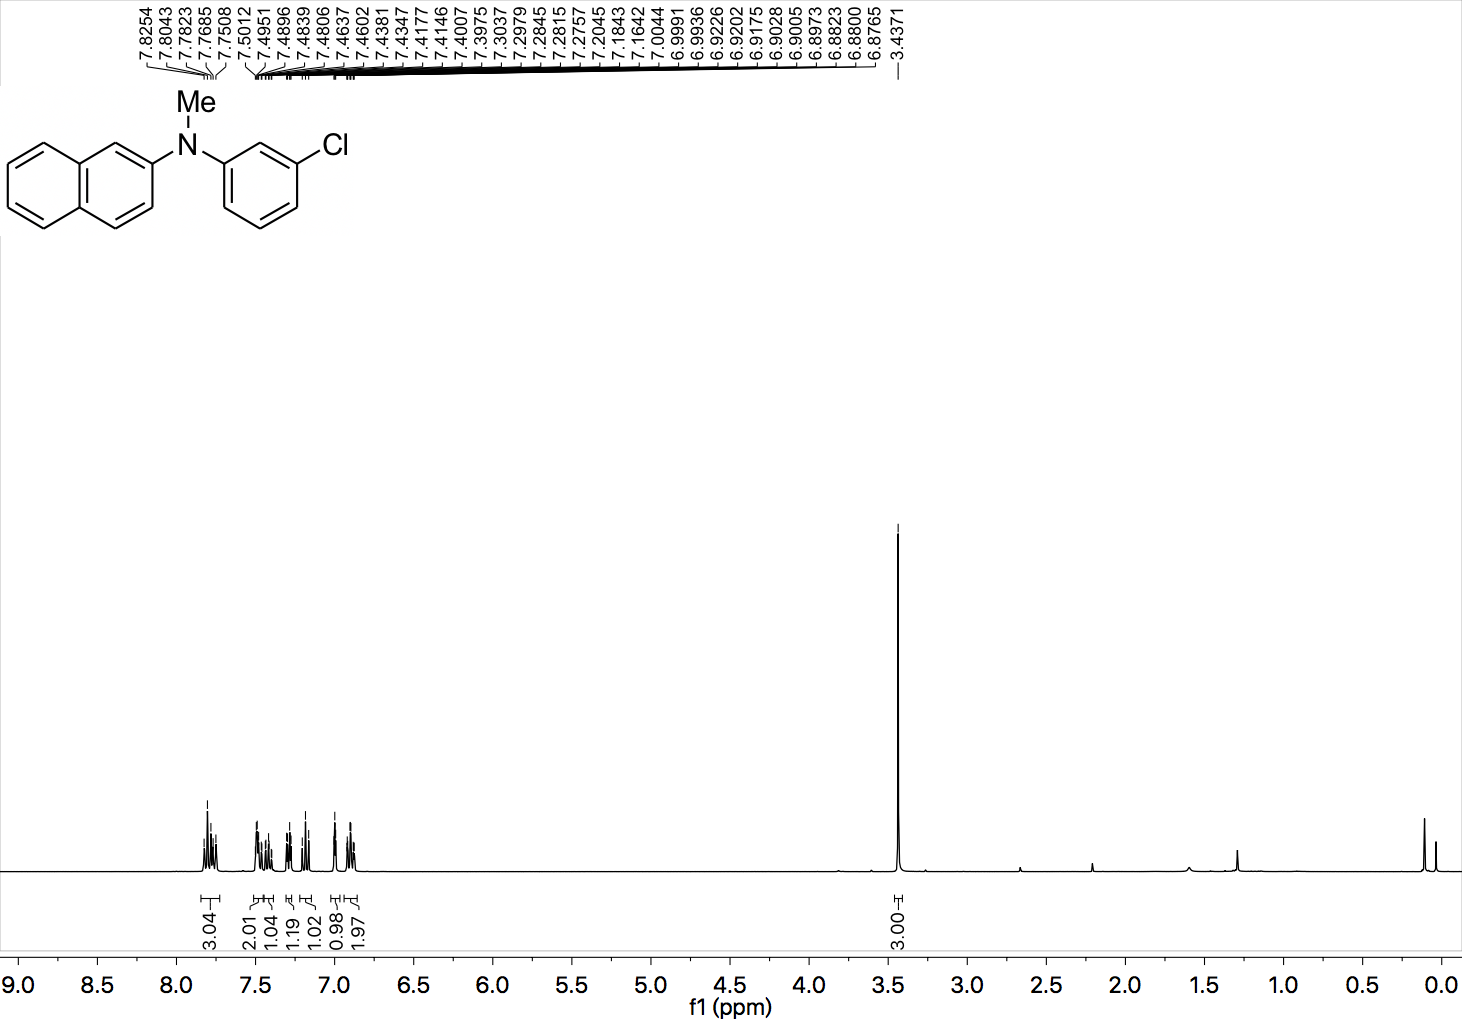


13C NMR (101 MHz, CDCl3) spectrum of **46**.


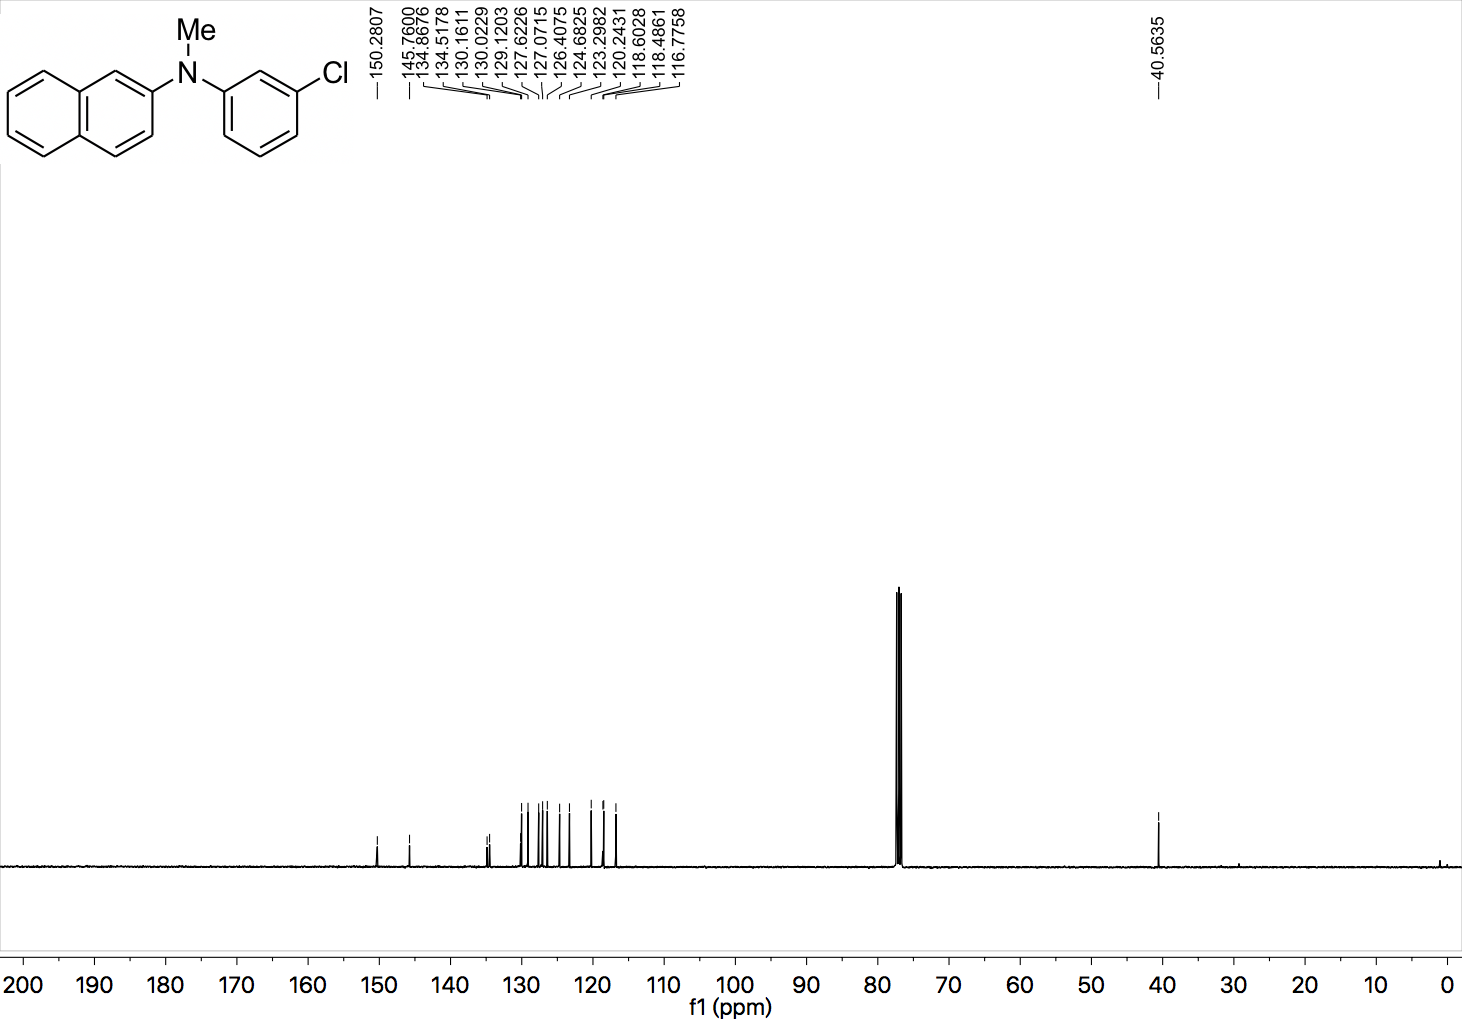


1H NMR (400 MHz, CDCl3) spectrum of **47**.


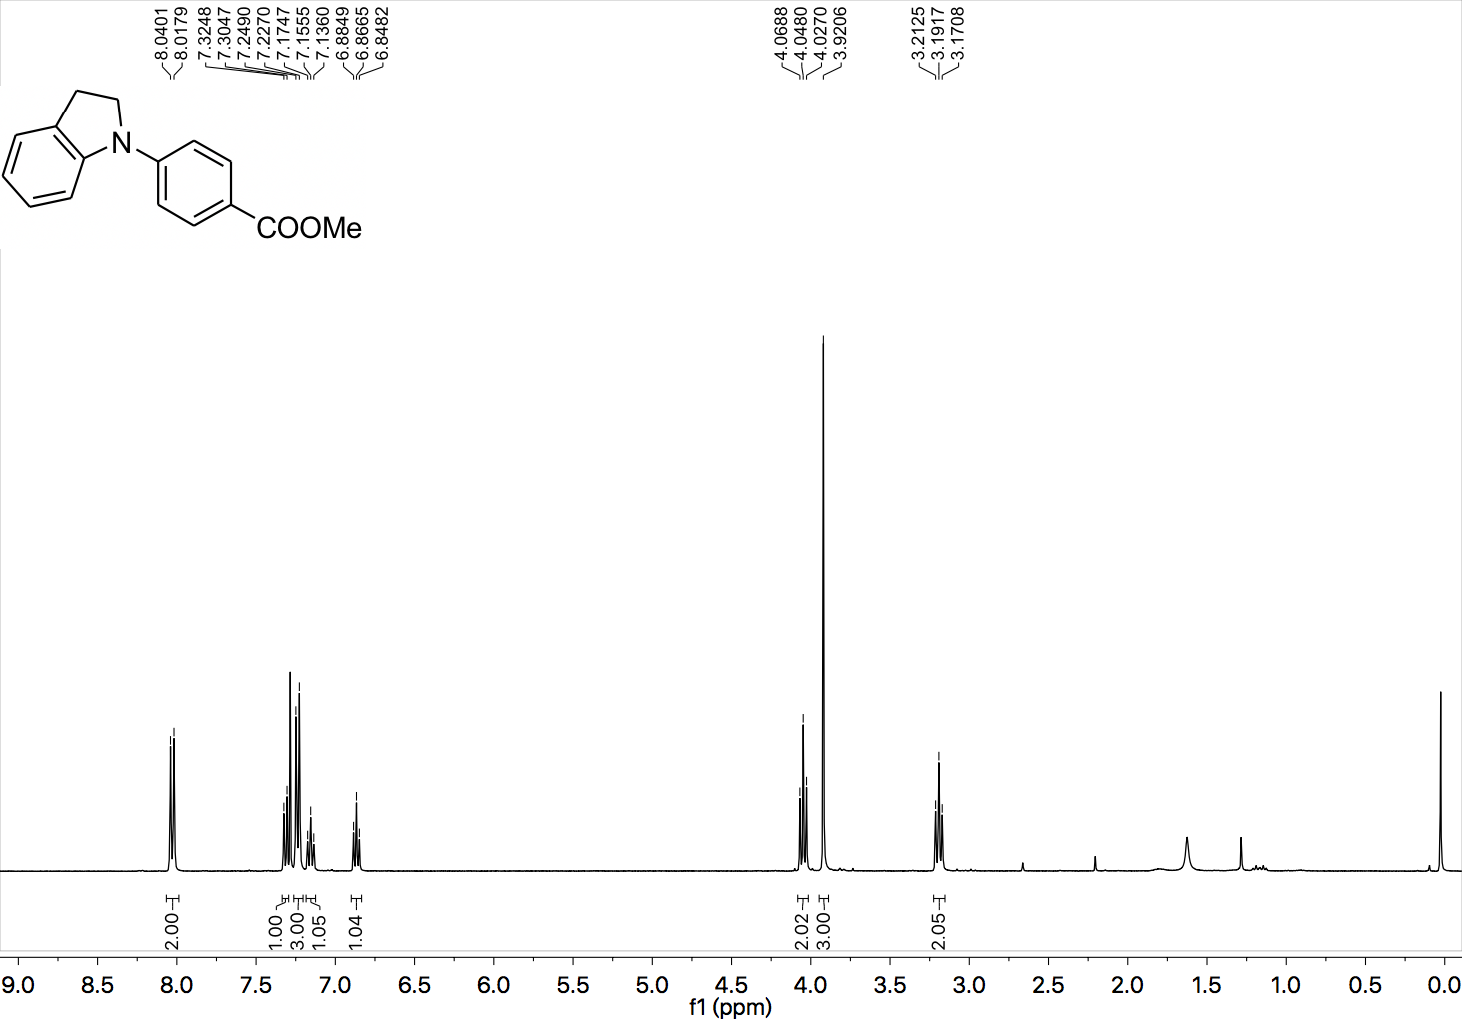


13C NMR (101 MHz, CDCl3) spectrum of **47**.


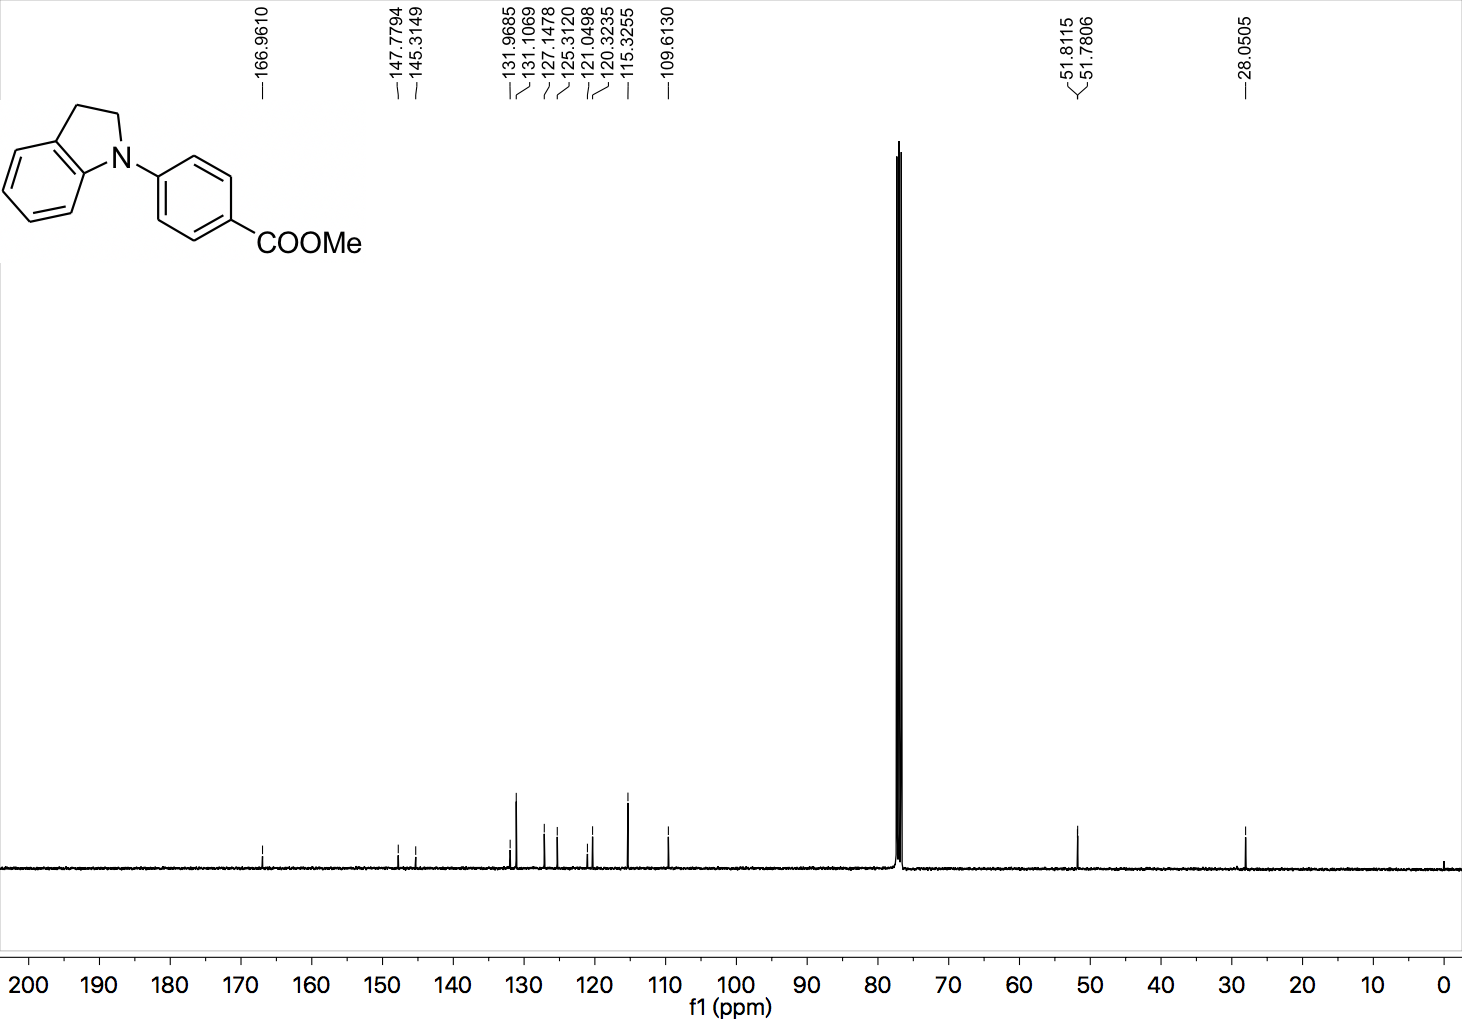


1H NMR (400 MHz, CDCl3) spectrum of **48**.


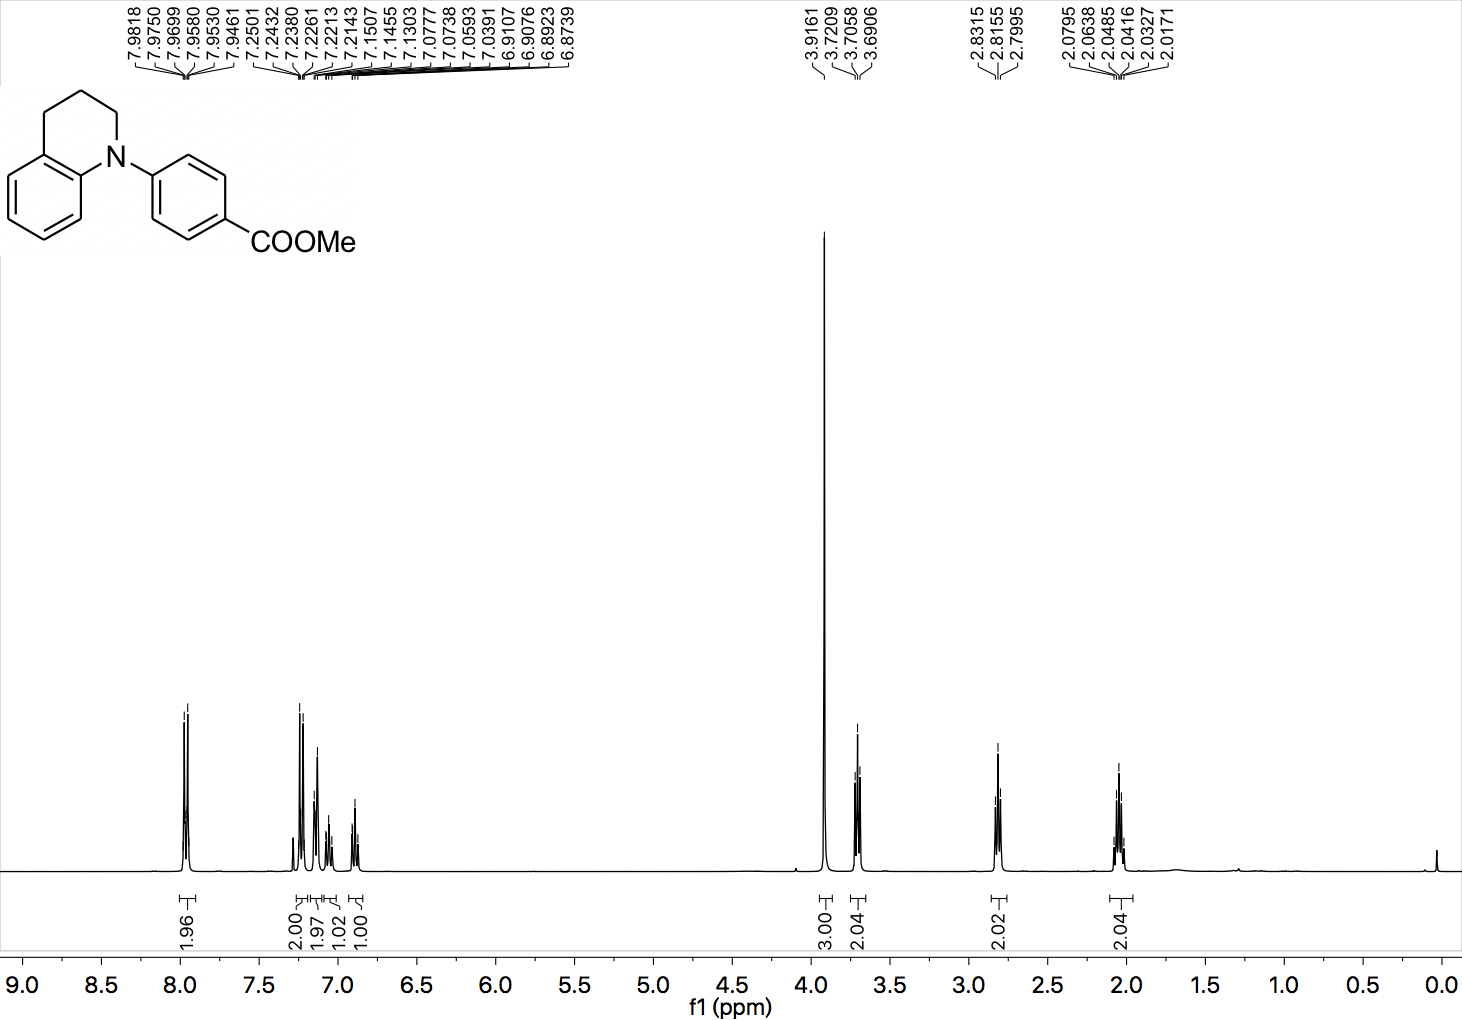


13C NMR (101 MHz, CDCl3) spectrum of **48**.


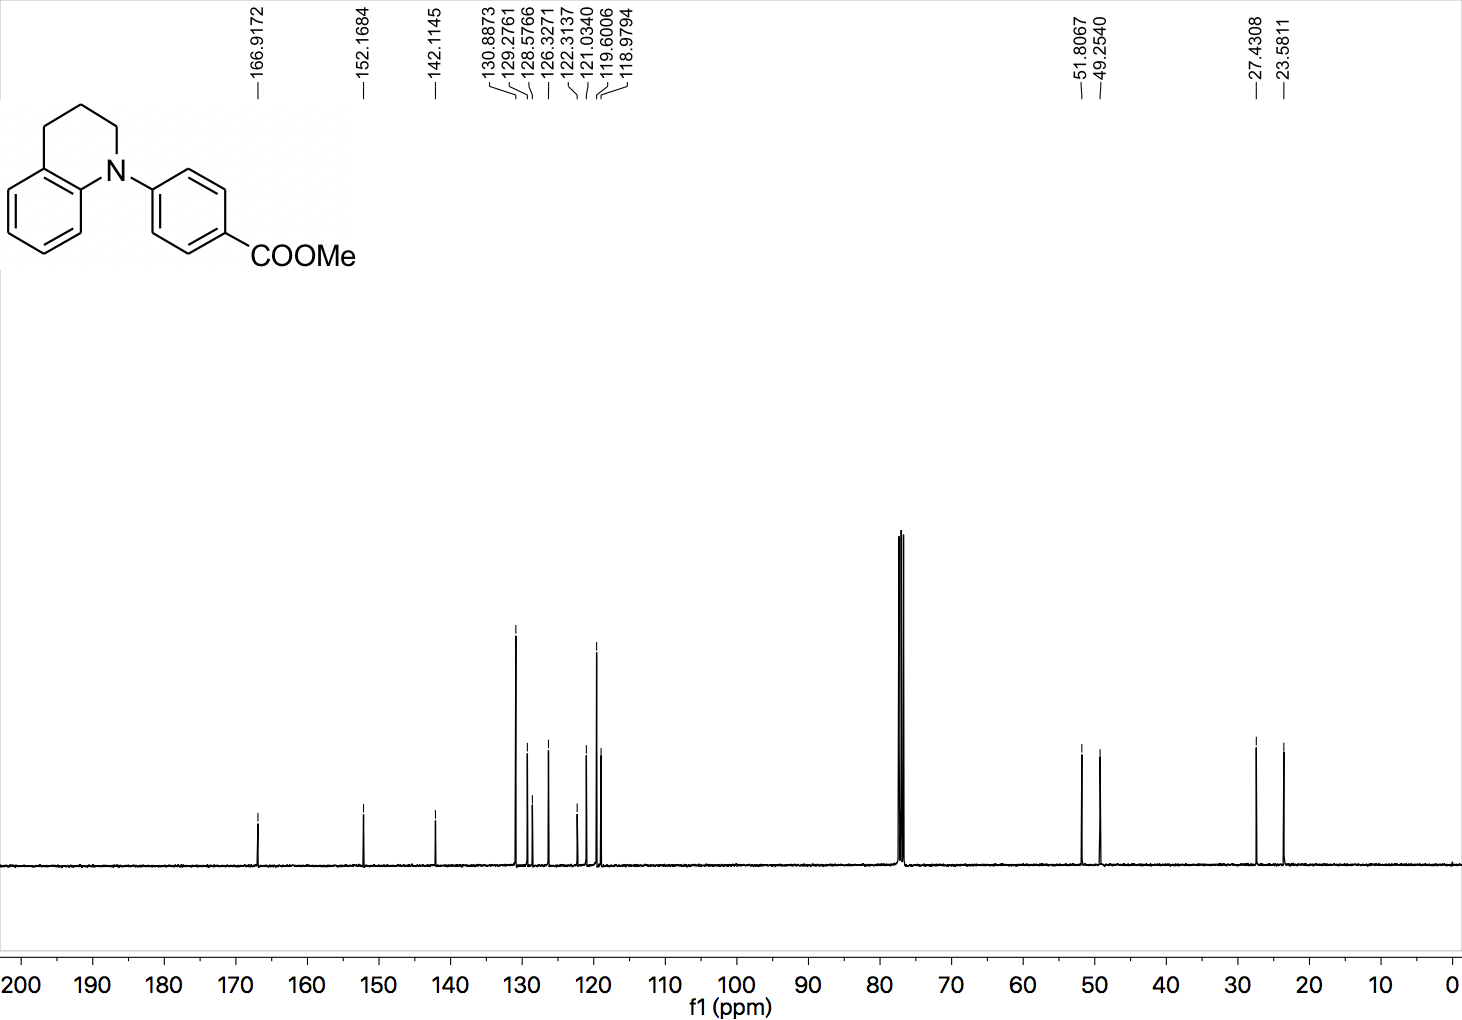


1H NMR (400 MHz, CDCl3) spectrum of **49**.


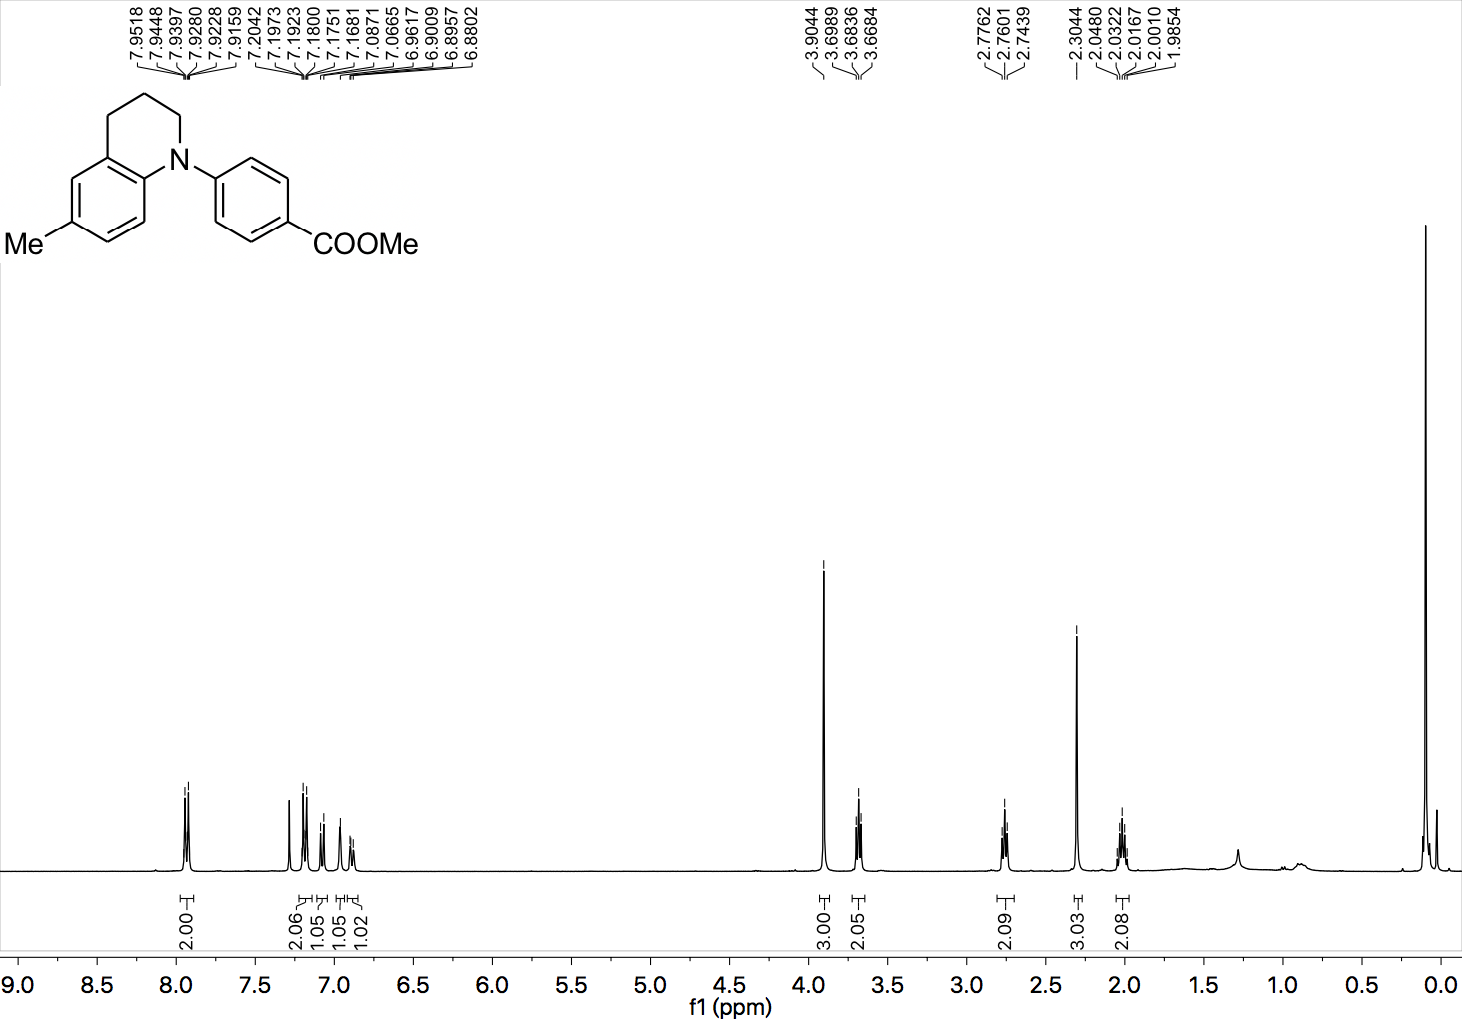


13C NMR (101 MHz, CDCl3) spectrum of **49**.


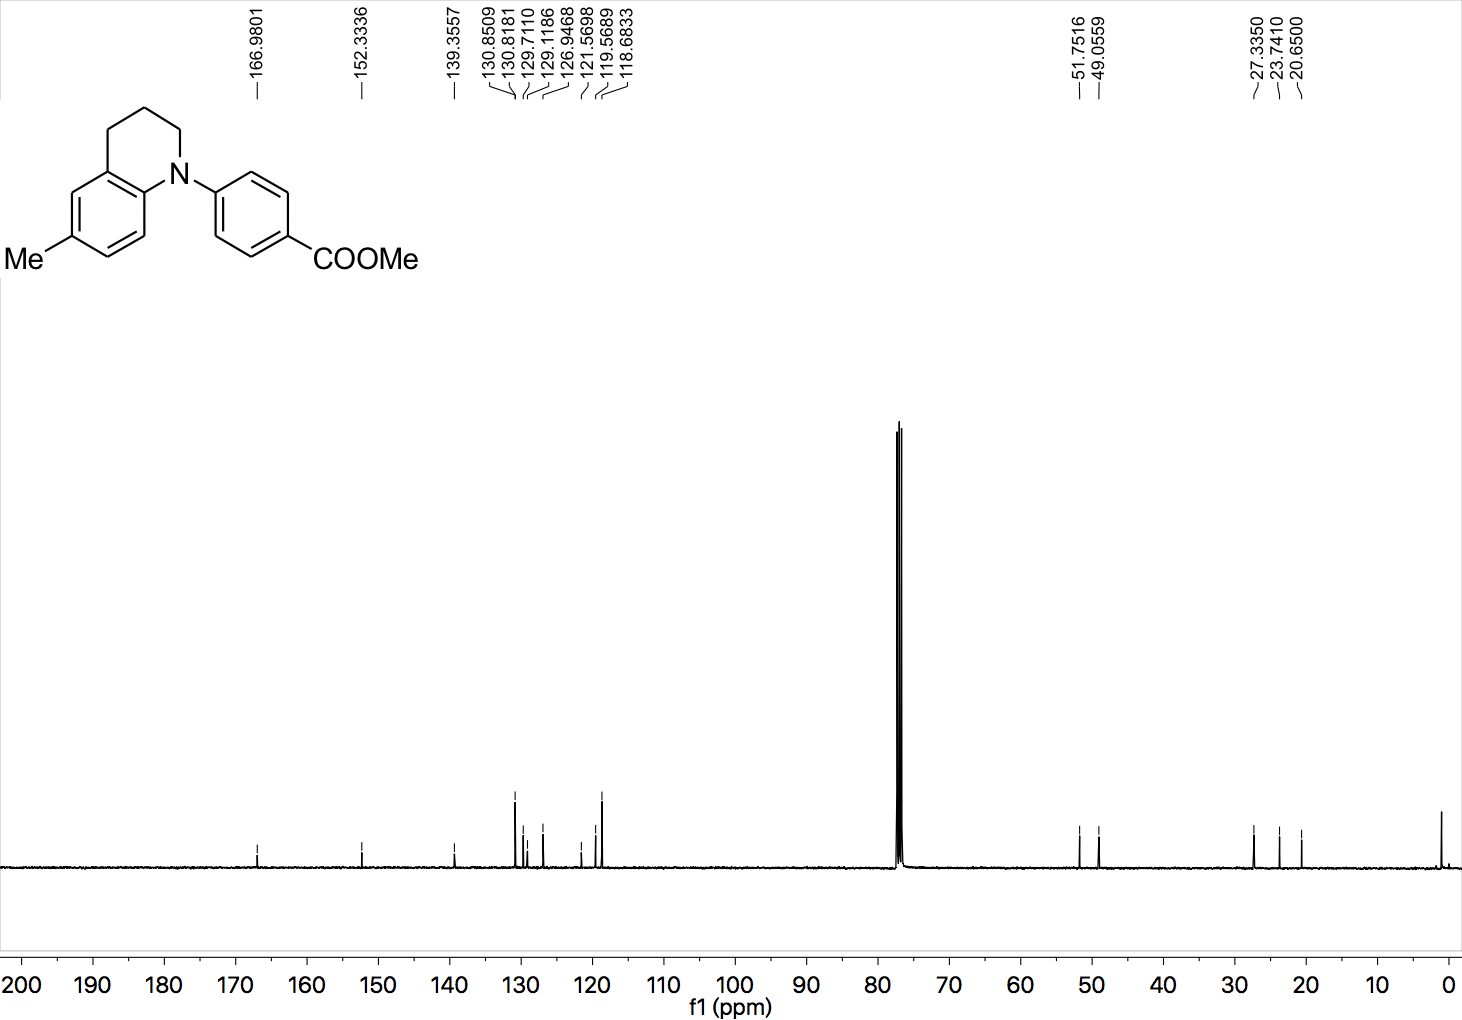


1H NMR (400 MHz, CDCl3) spectrum of **50**.


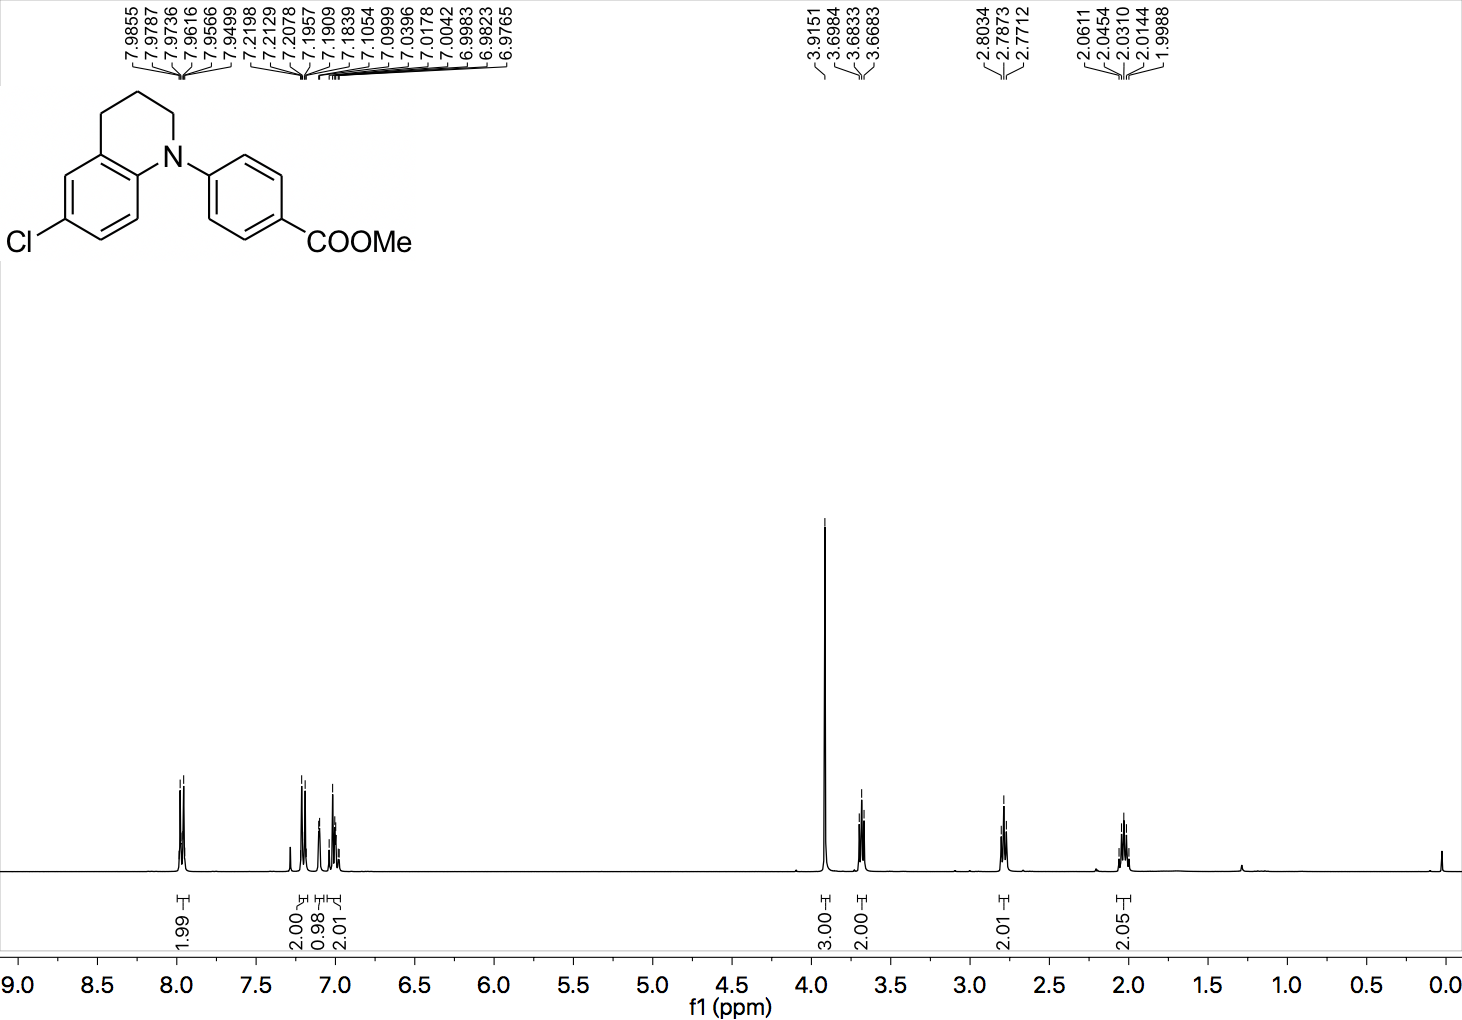


13C NMR (101 MHz, CDCl3) spectrum of **50**.


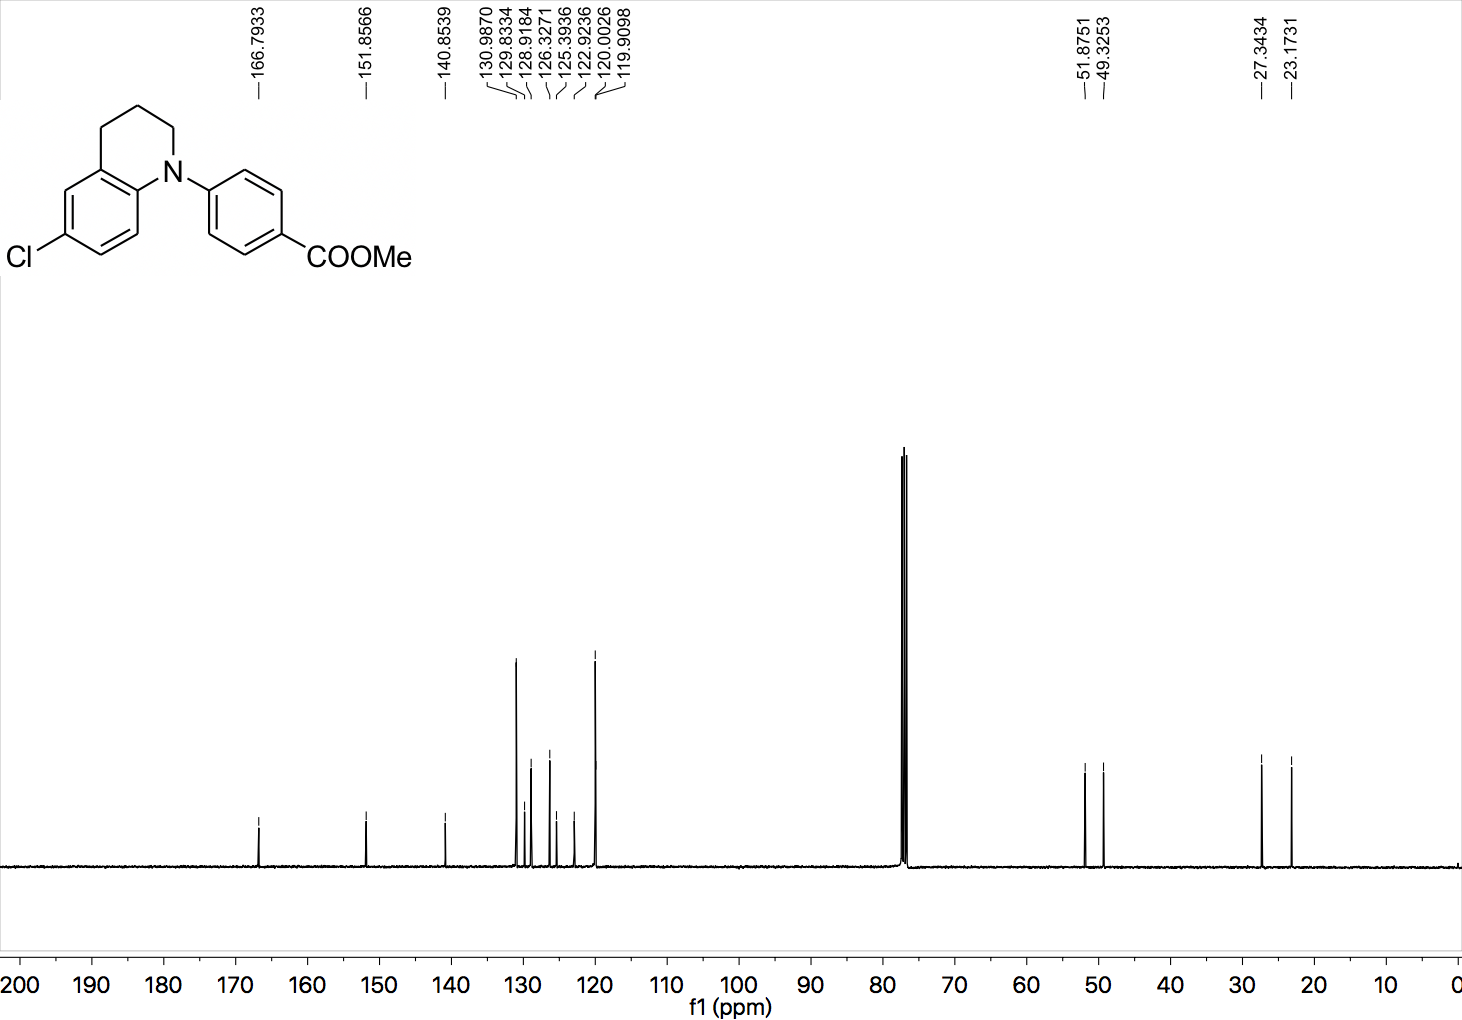


1H NMR (400 MHz, CDCl3) spectrum of **51**.


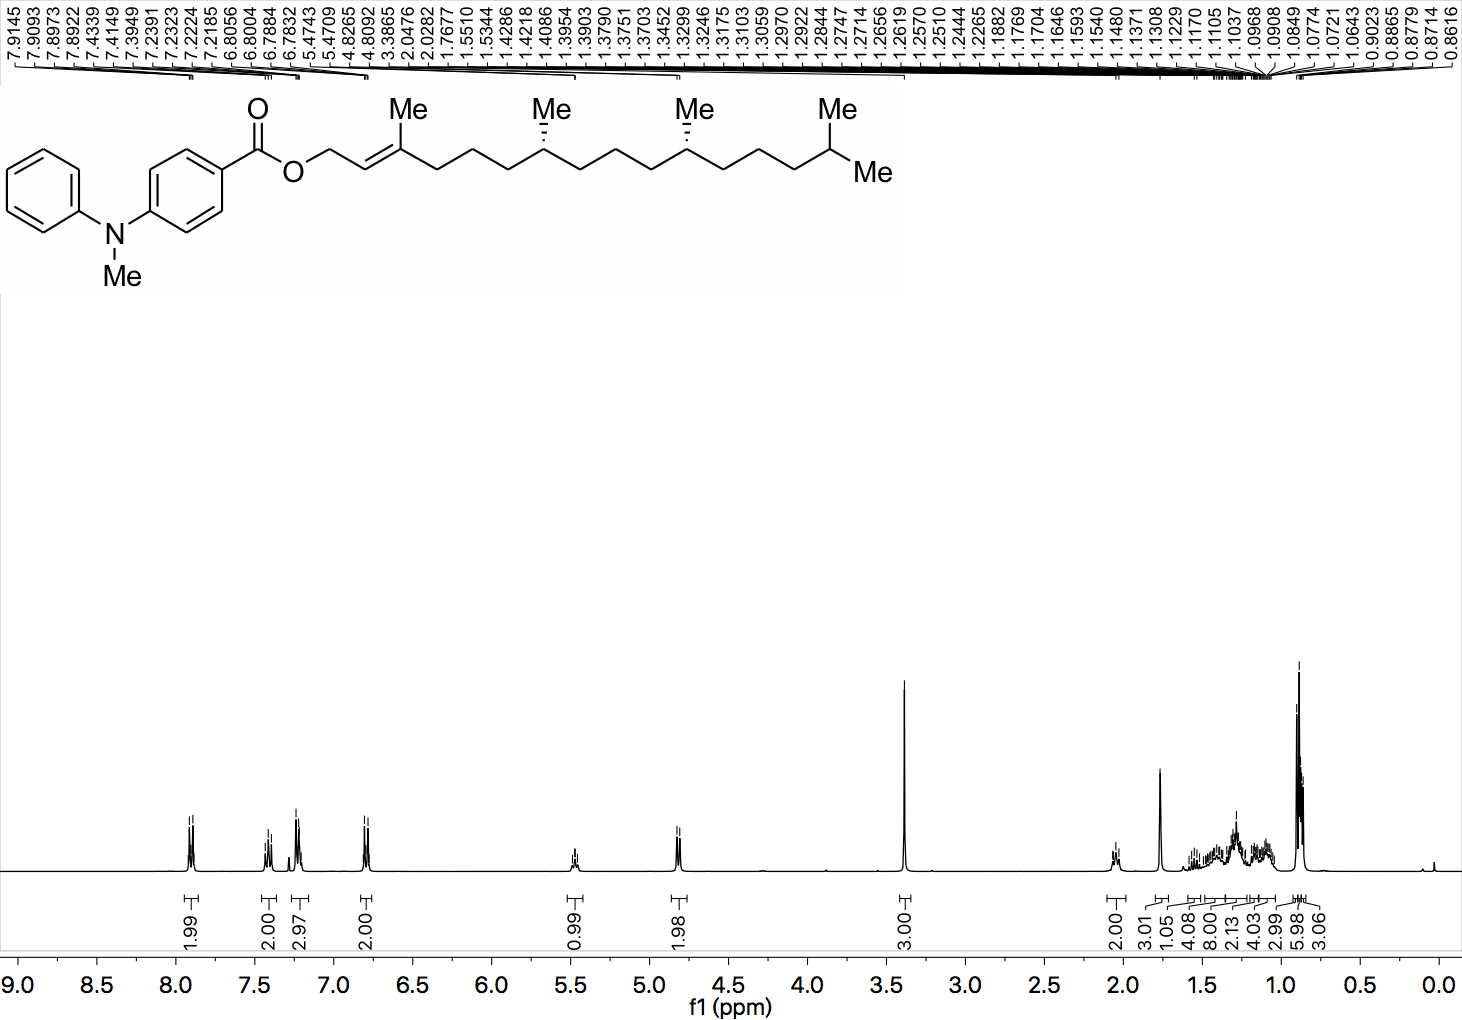


13C NMR (101 MHz, CDCl3) spectrum of **51**.


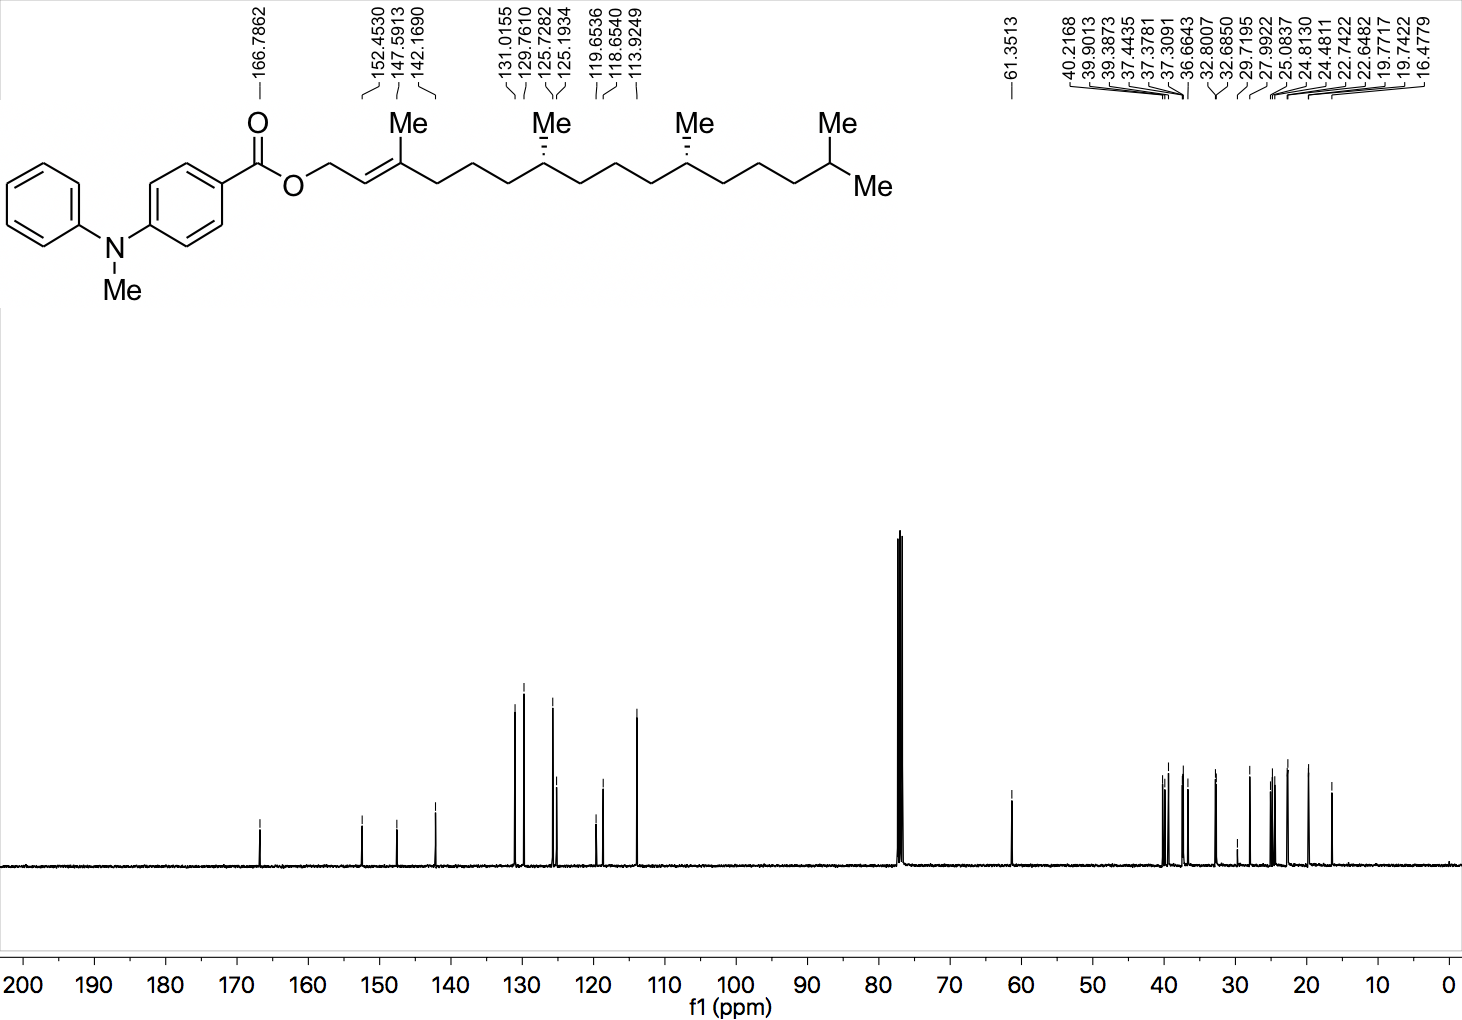


1H NMR (400 MHz, CDCl3) spectrum of **52**.


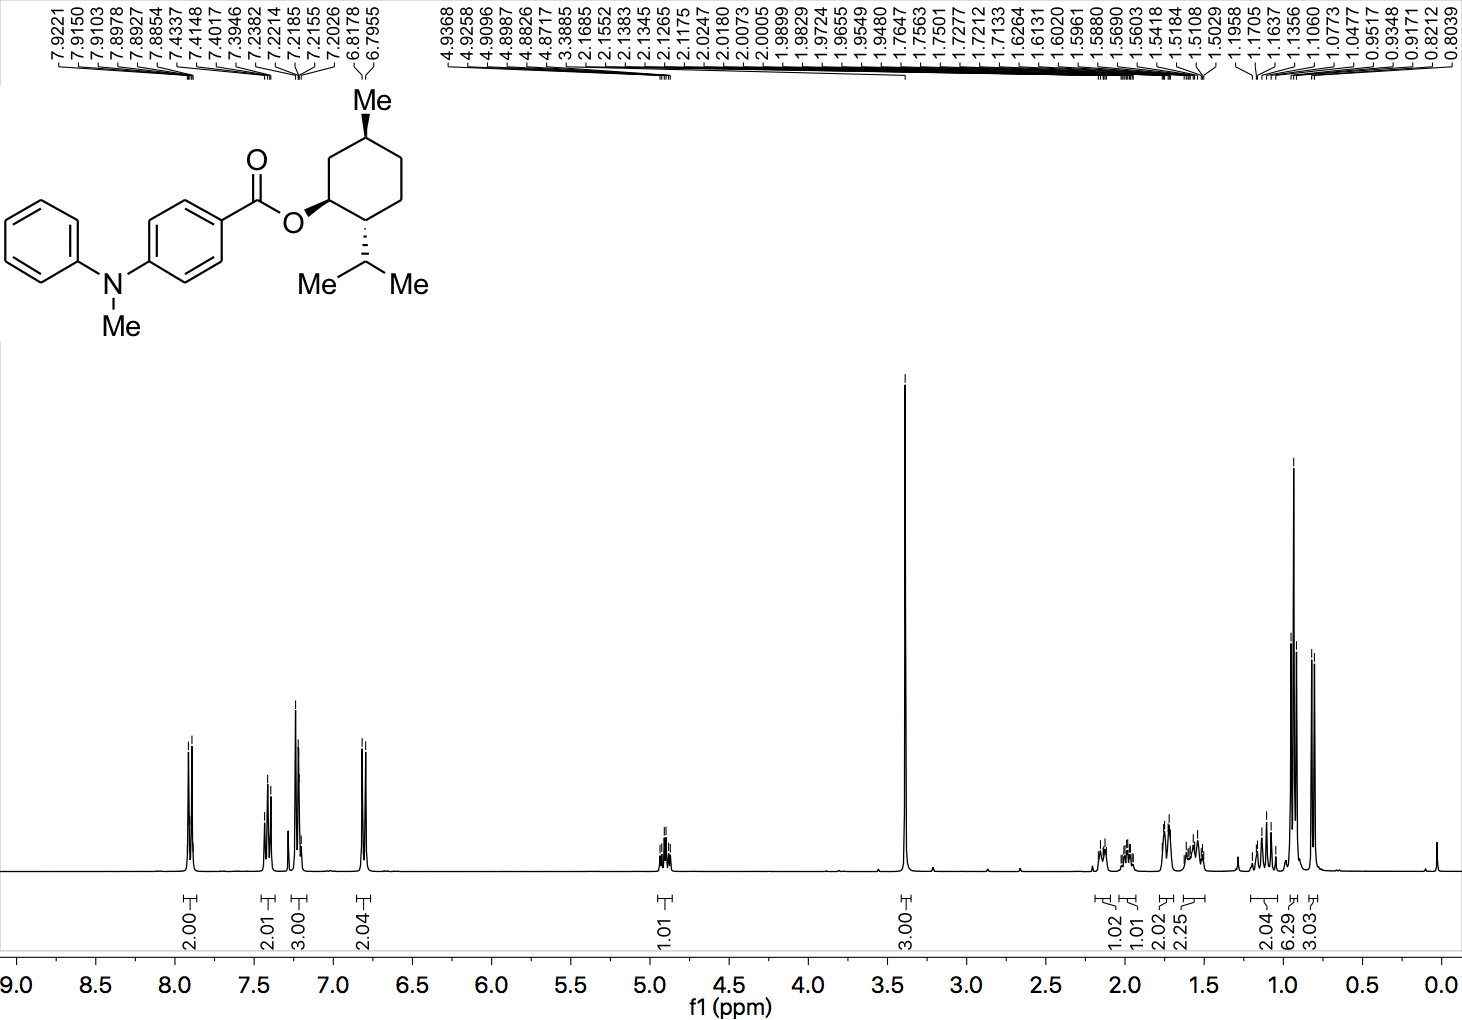


13C NMR (101 MHz, CDCl3) spectrum of **52**.


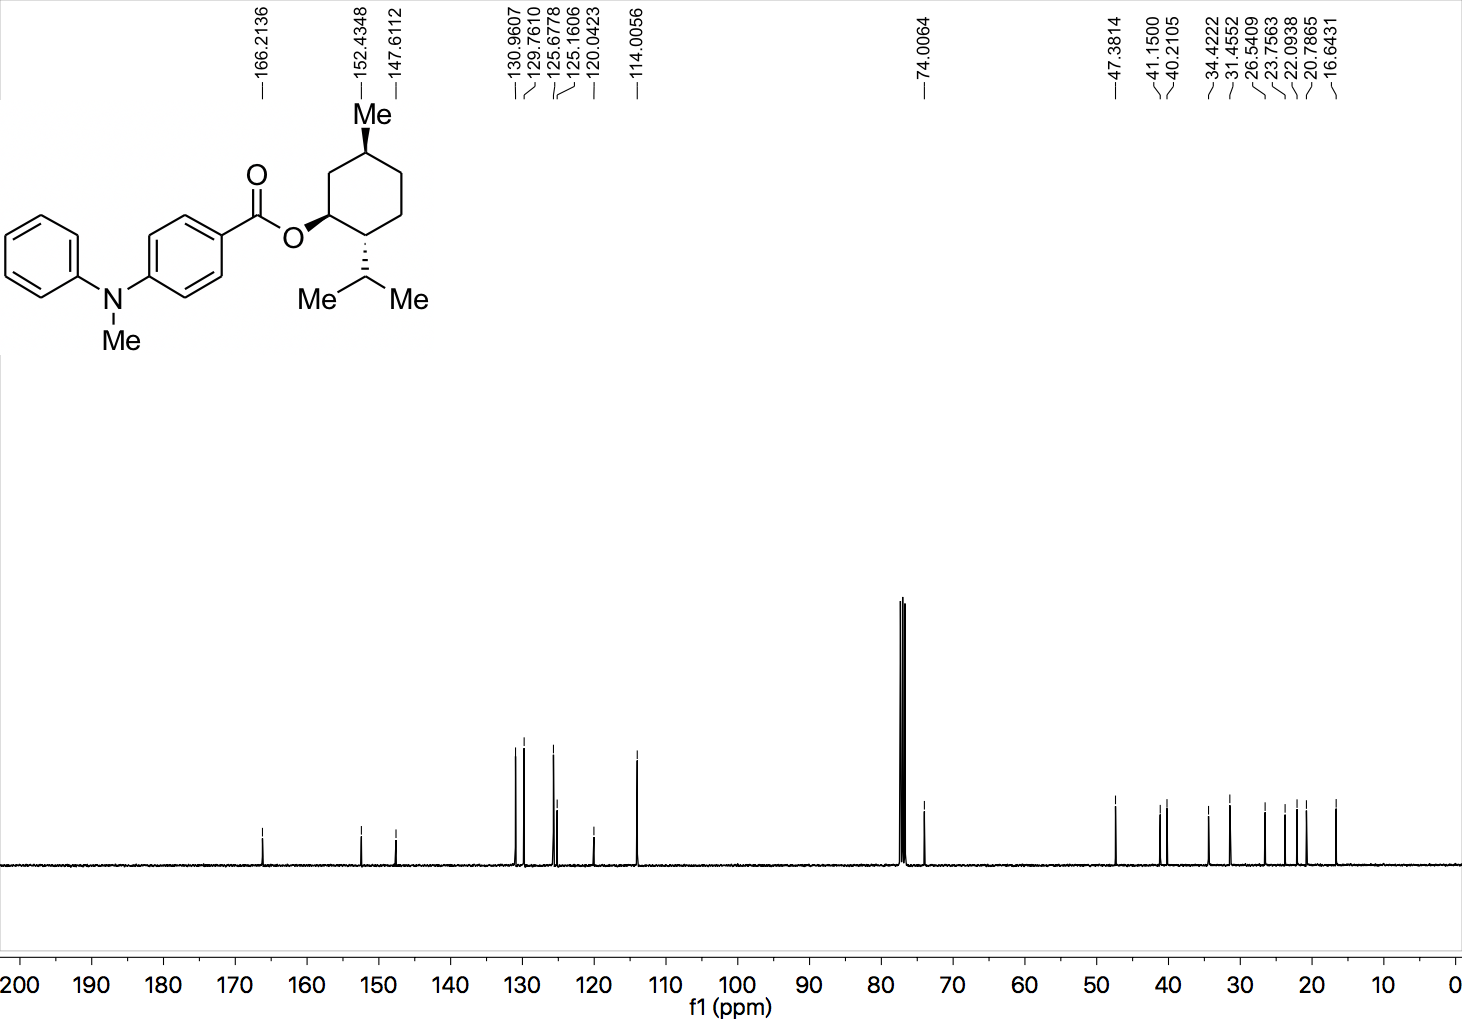


1H NMR (400 MHz, CDCl3) spectrum of **53**.


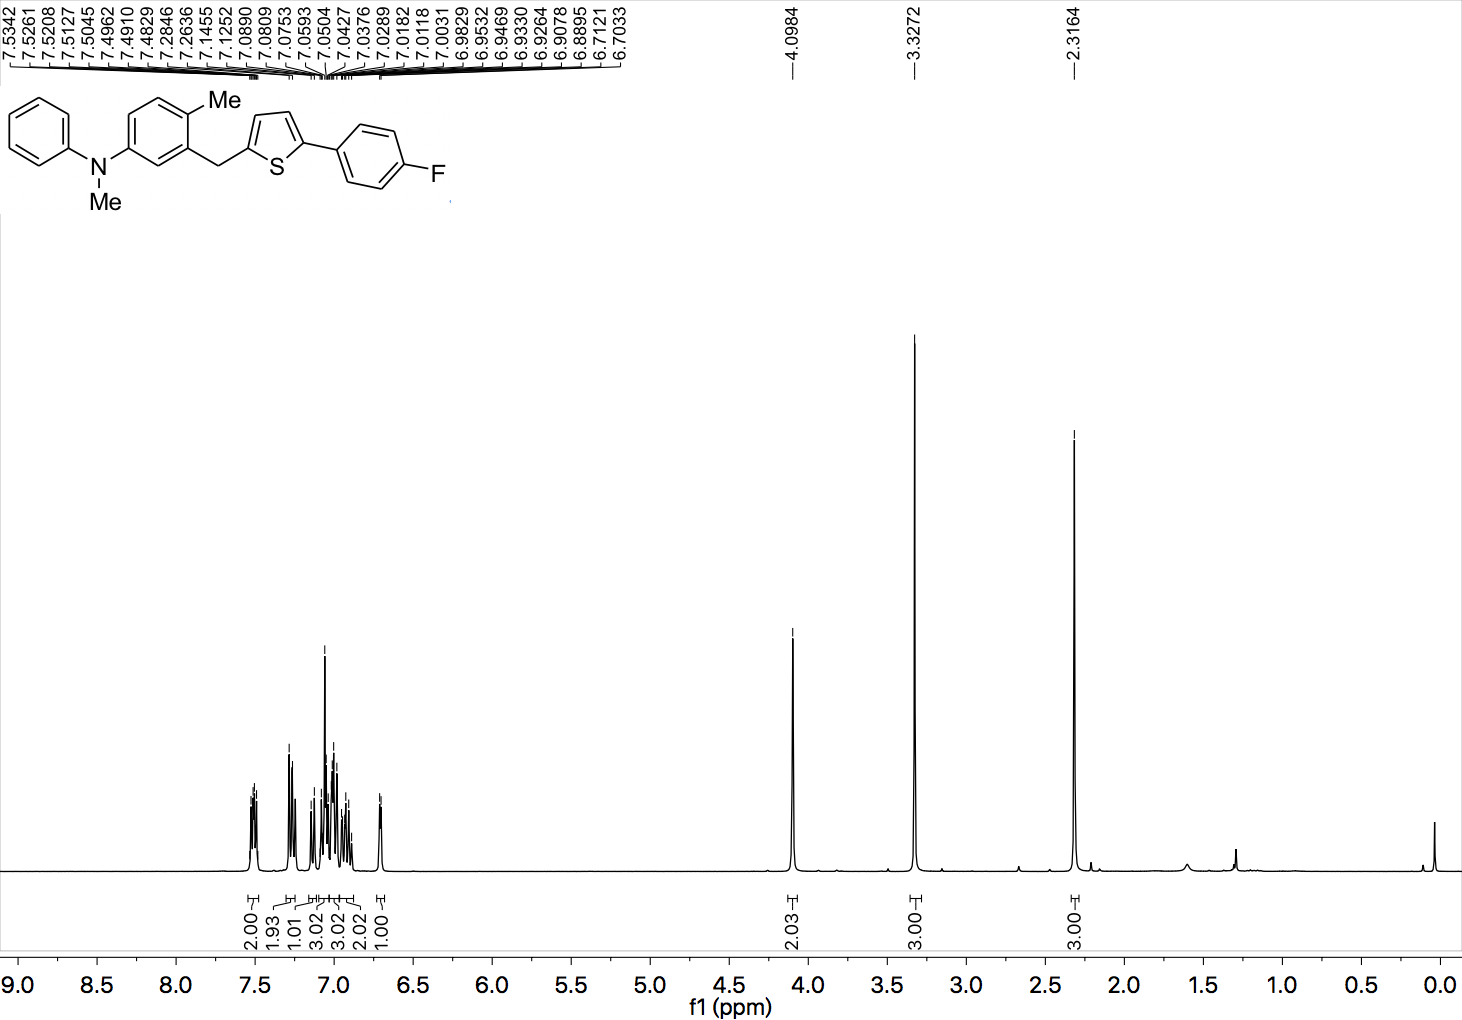


13C NMR (101 MHz, CDCl3) spectrum of **53**.


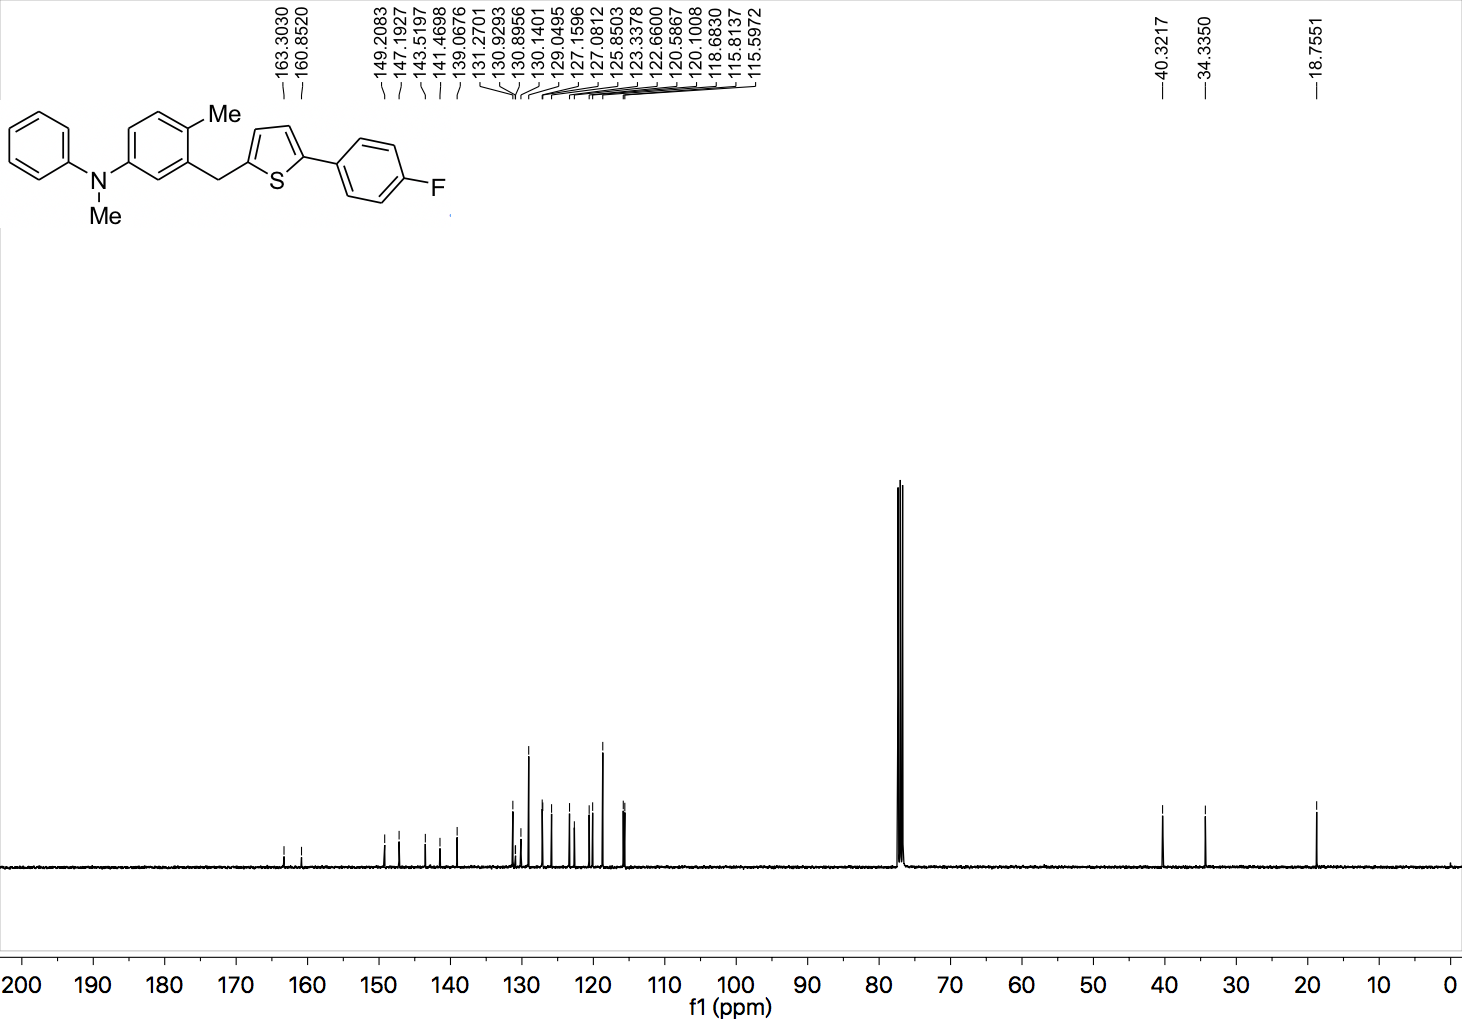


19F NMR (377 MHz, CDCl3) spectrum of **53**.


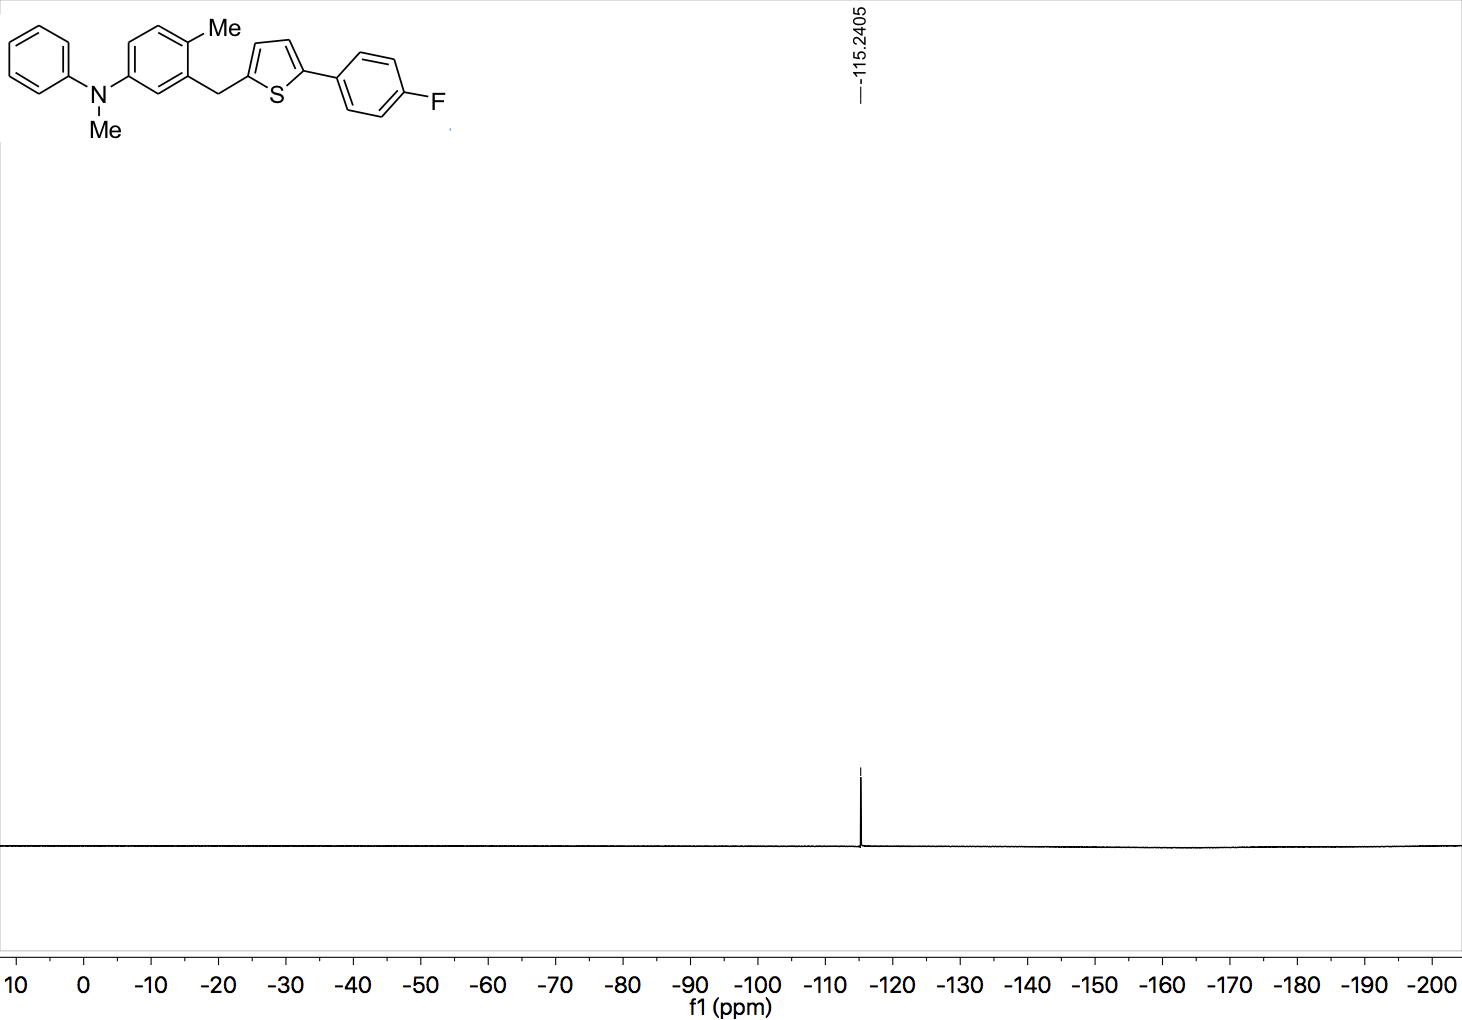


1H NMR (400 MHz, CDCl3) spectrum of **54**.


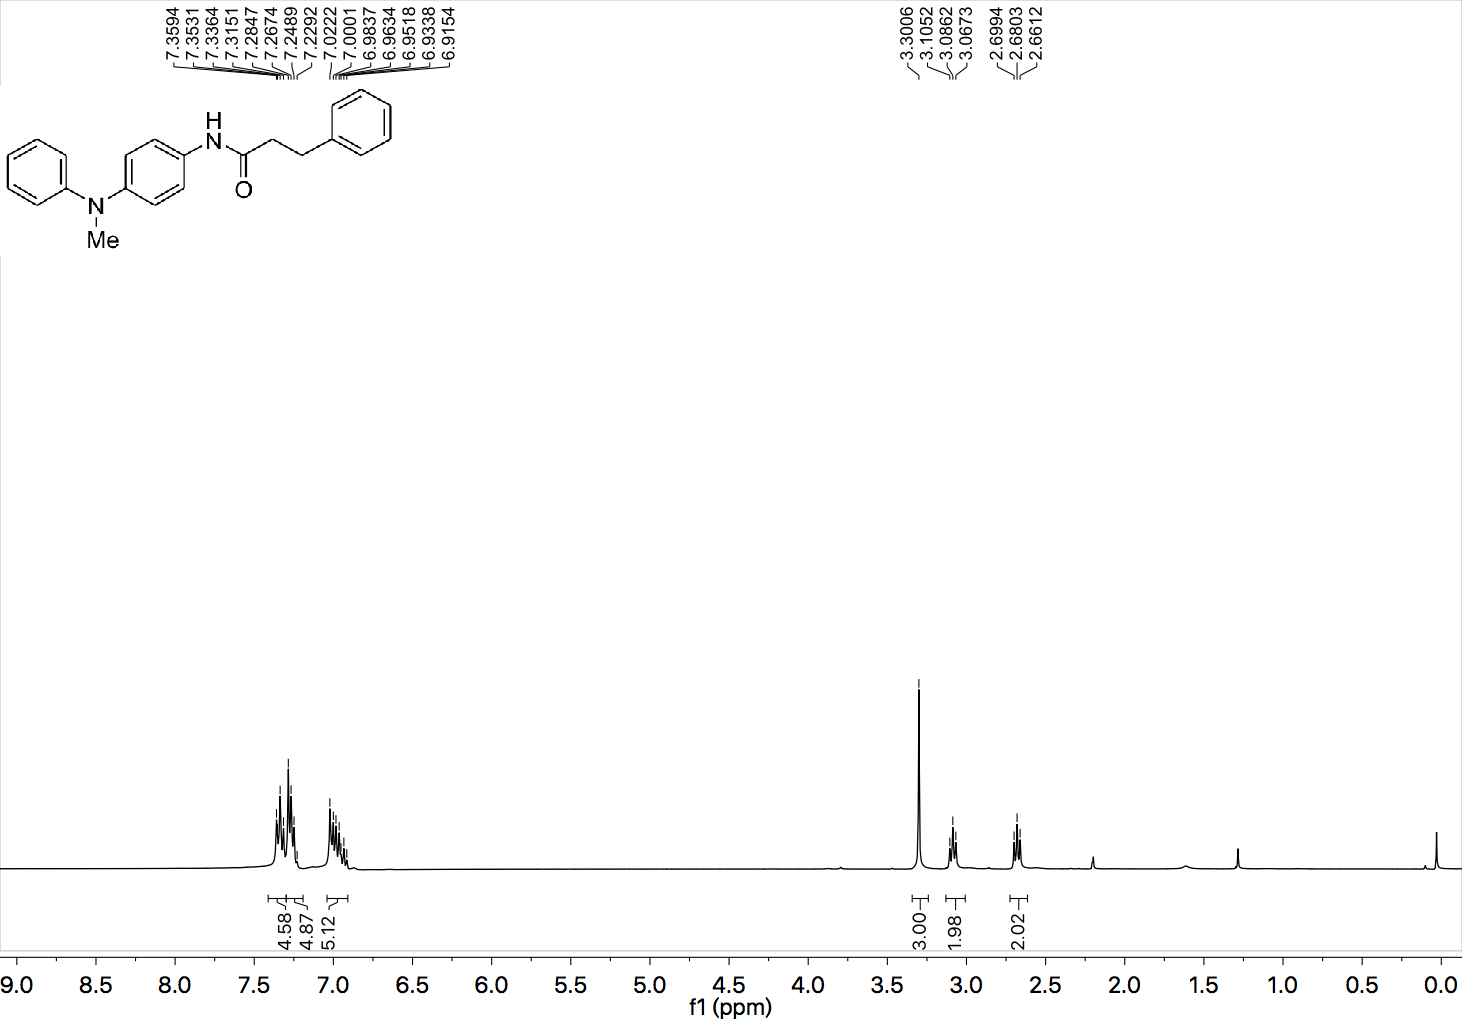


13C NMR (101 MHz, CDCl3) spectrum of **54**.


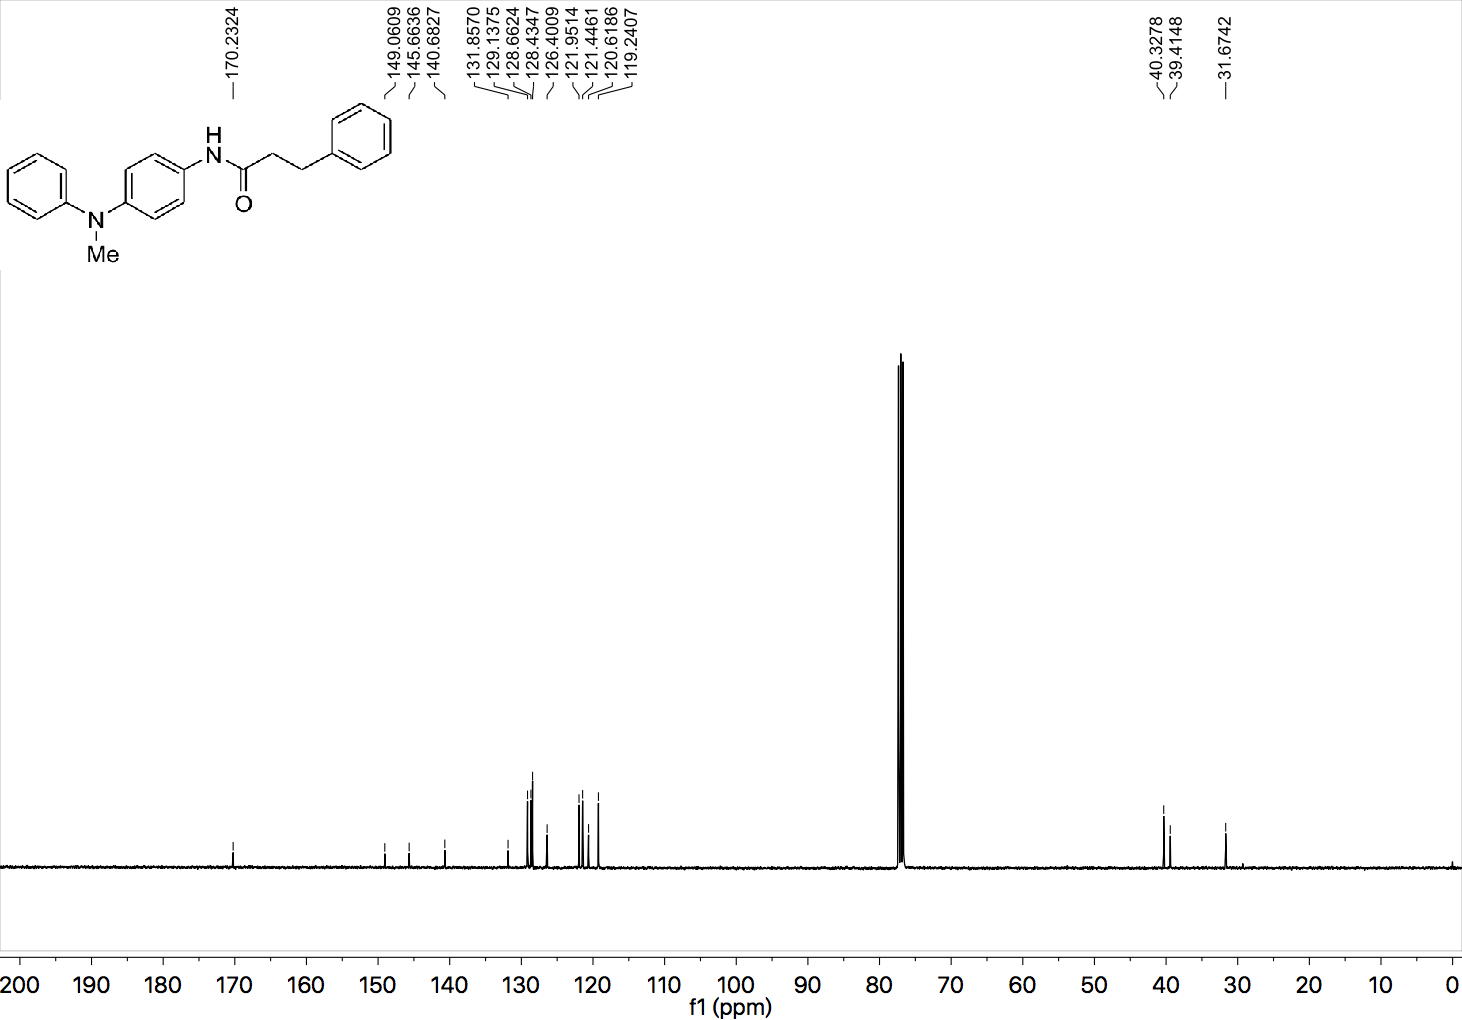


1H NMR (400 MHz, CDCl3) spectrum of **55**.


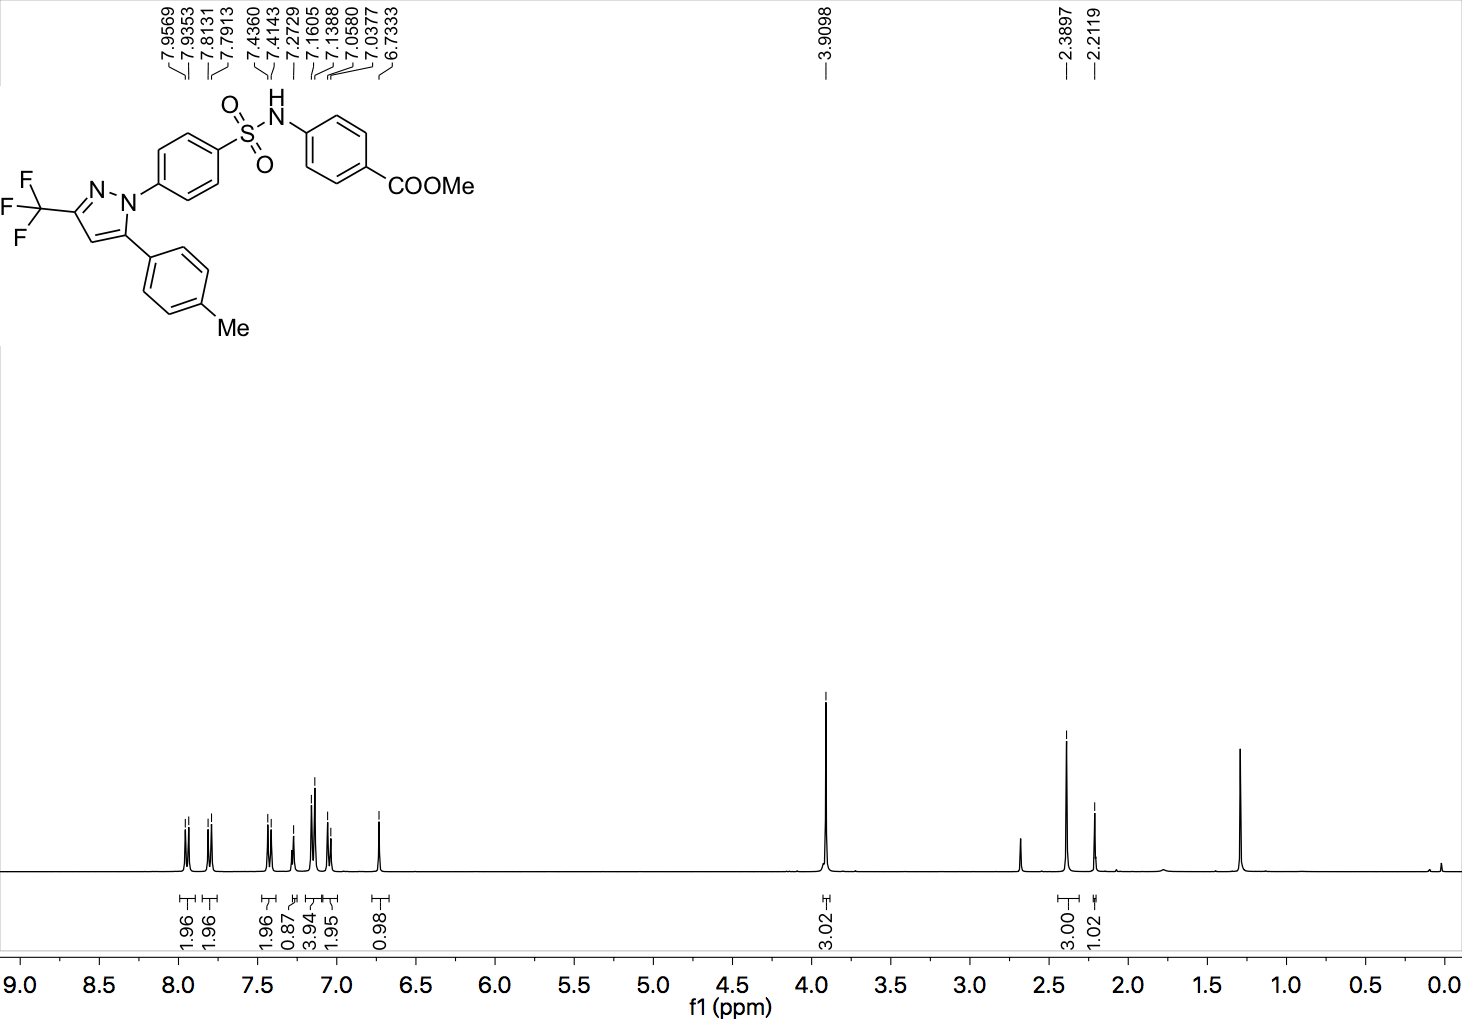


13C NMR (101 MHz, CDCl3) spectrum of **55**.


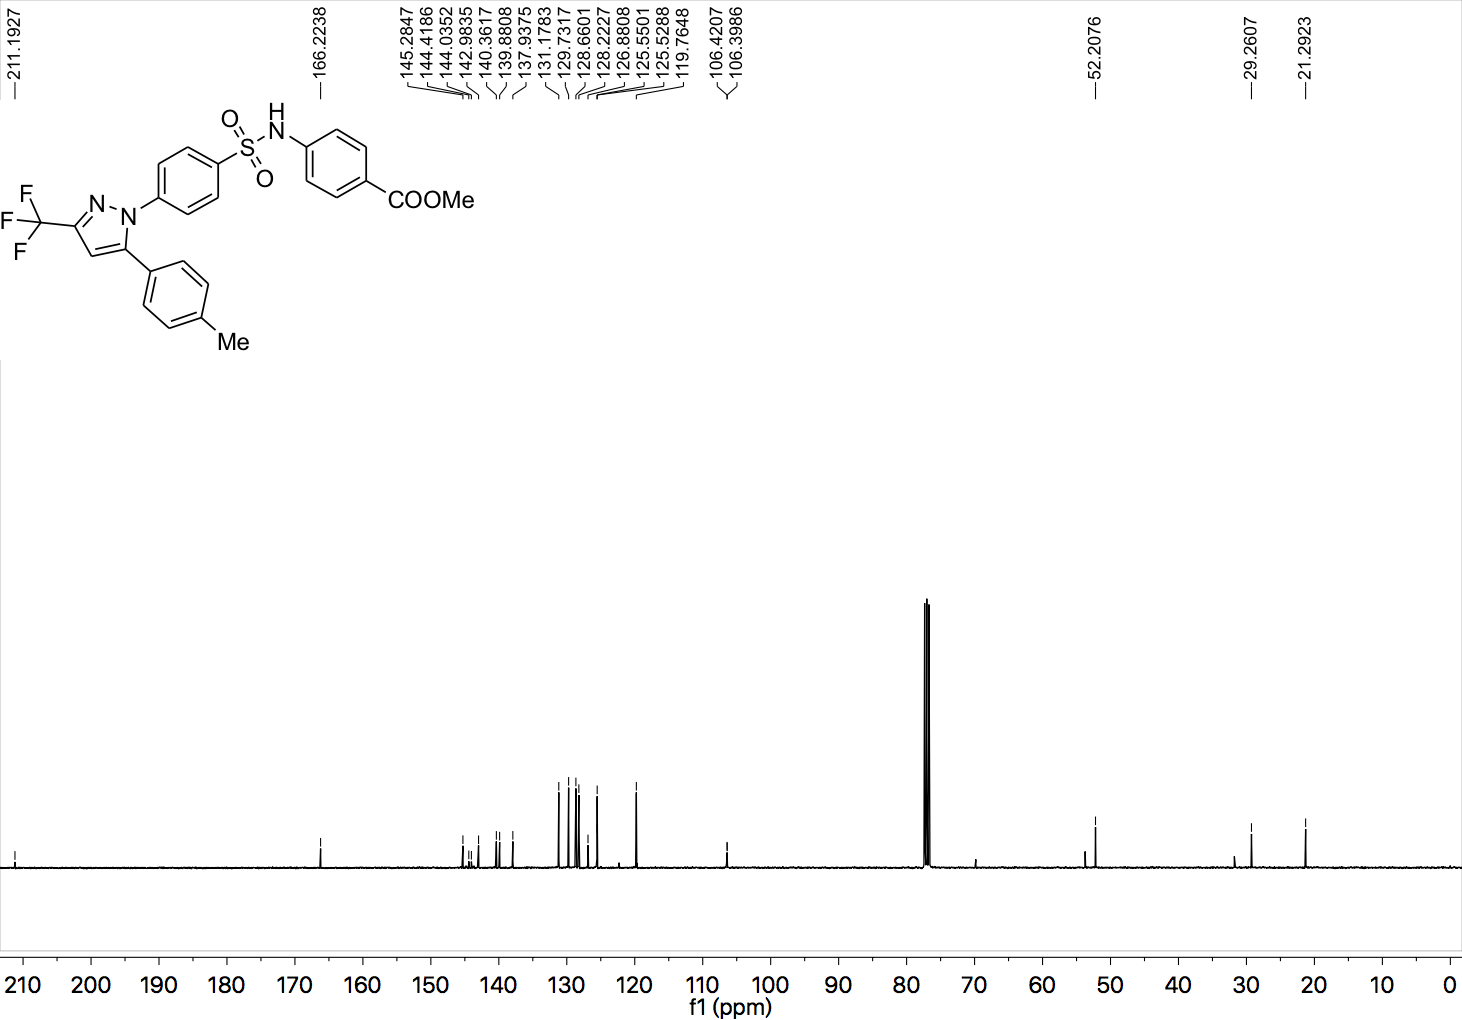


19F NMR (377 MHz, CDCl3) spectrum of **55**.


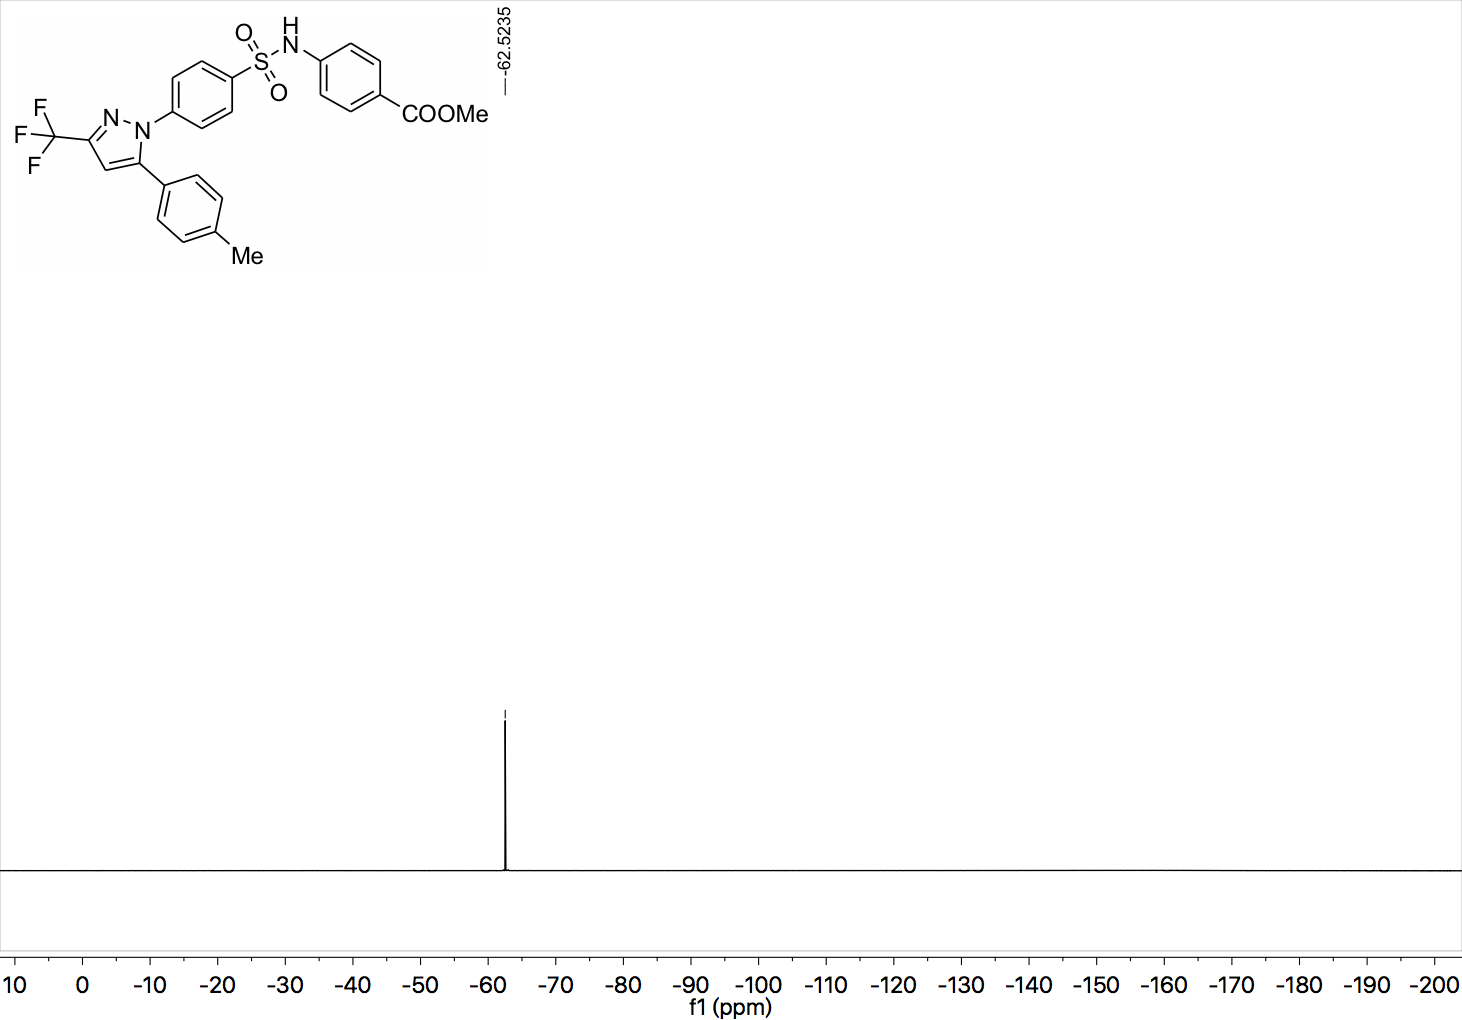


1H NMR (400 MHz, CDCl3) spectrum of **56**.


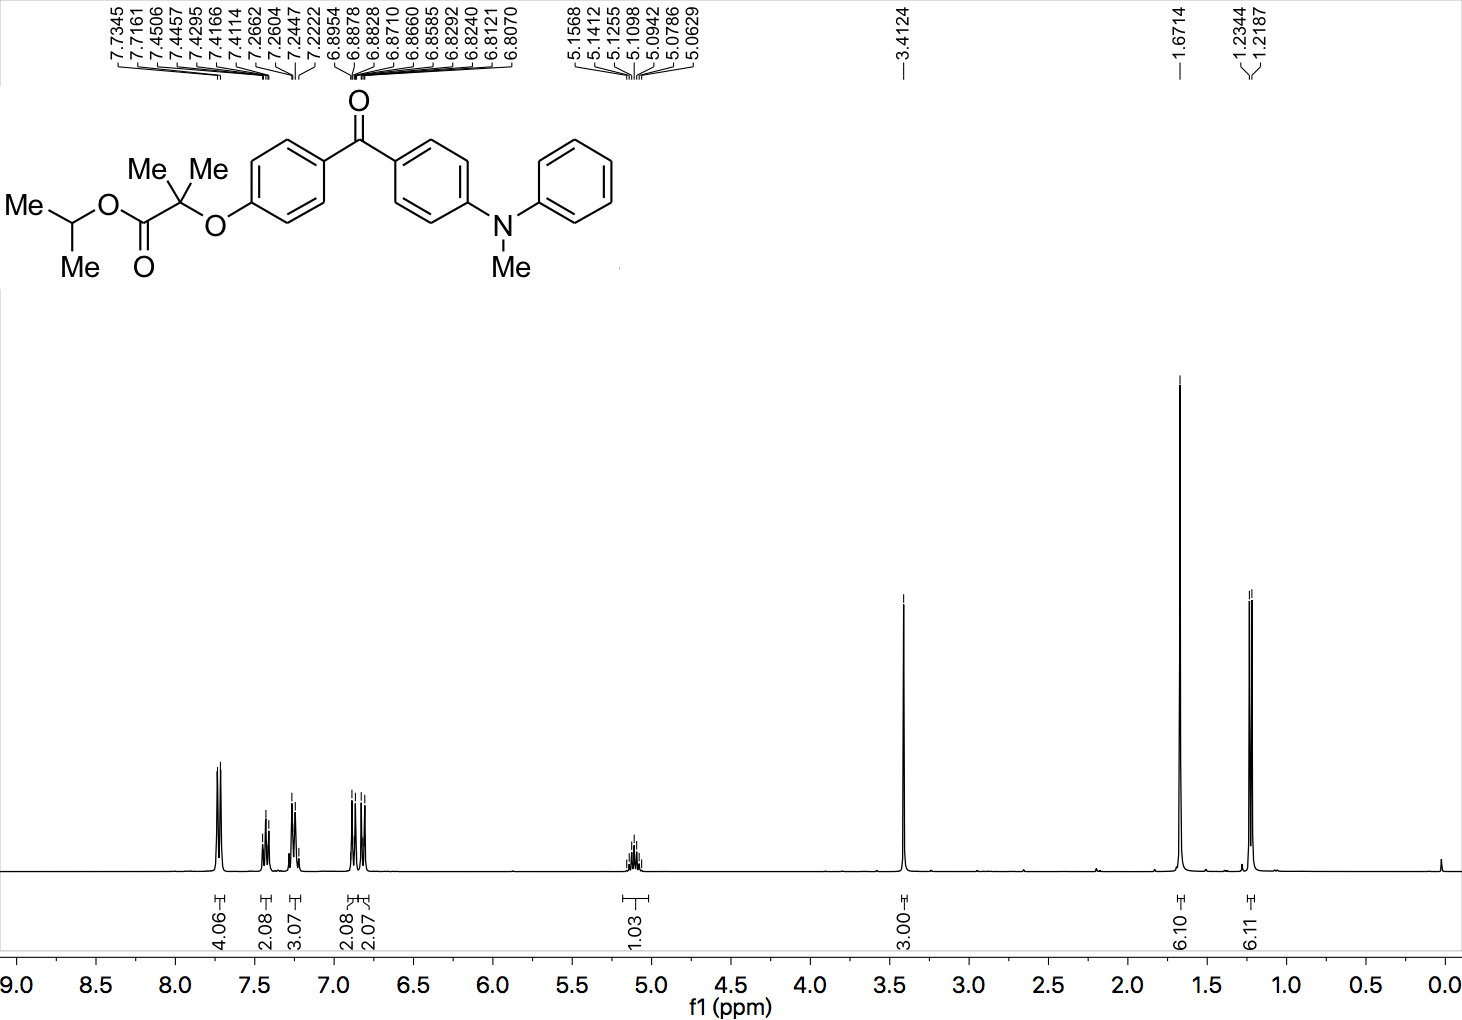


13C NMR (101 MHz, CDCl3) spectrum of **56**.


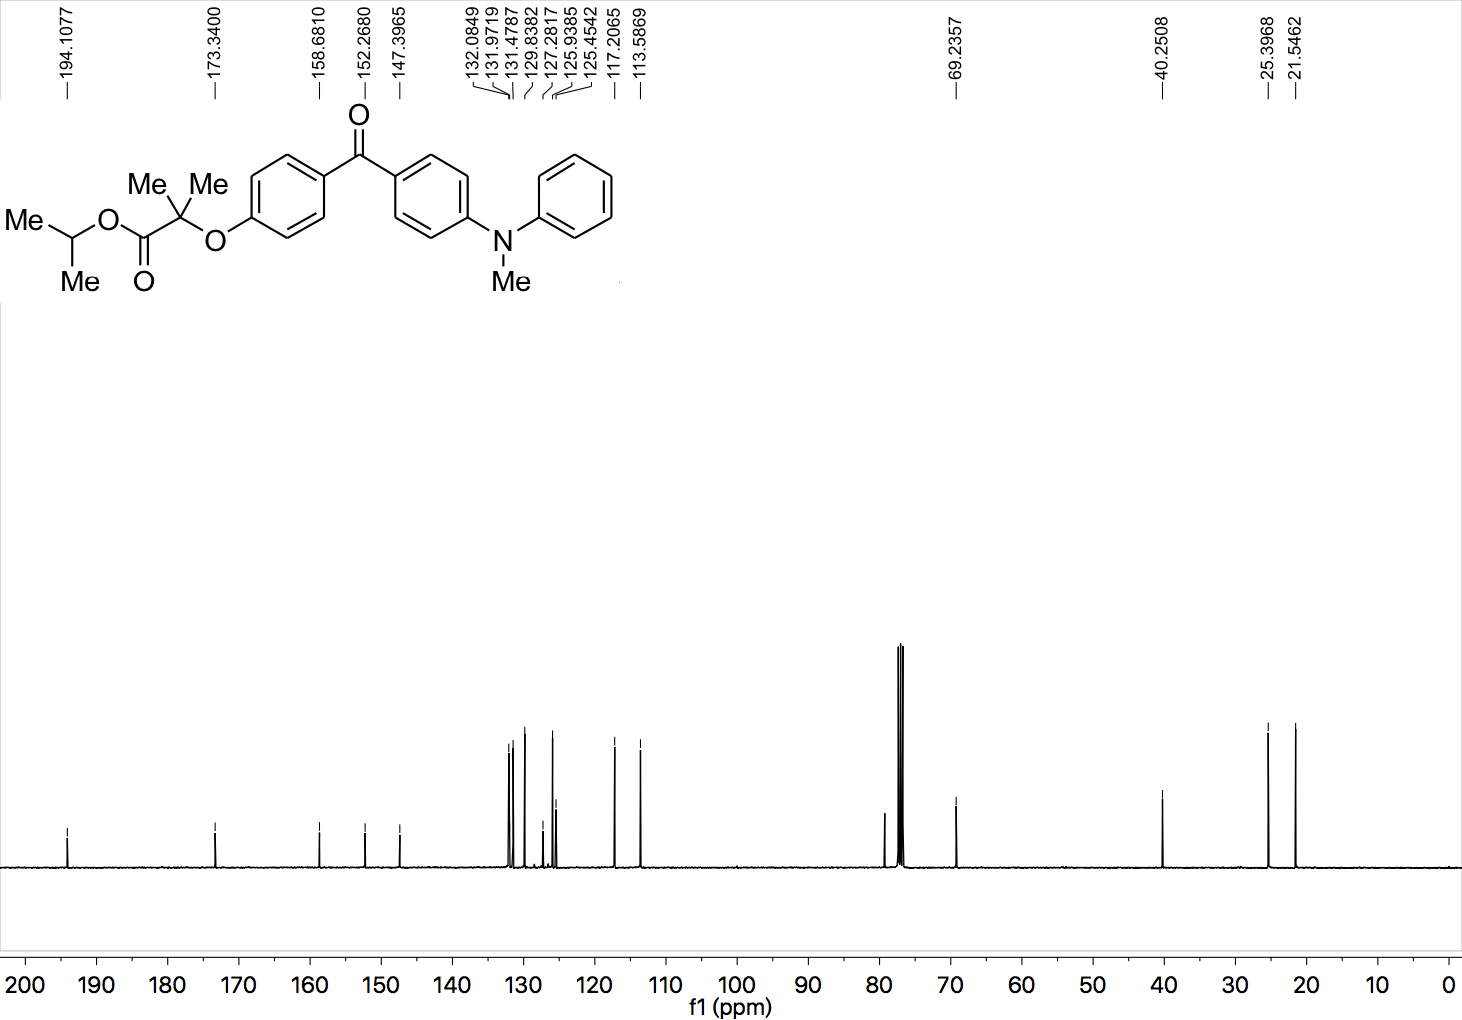


1H NMR (400 MHz, CDCl3) spectrum of **57**.


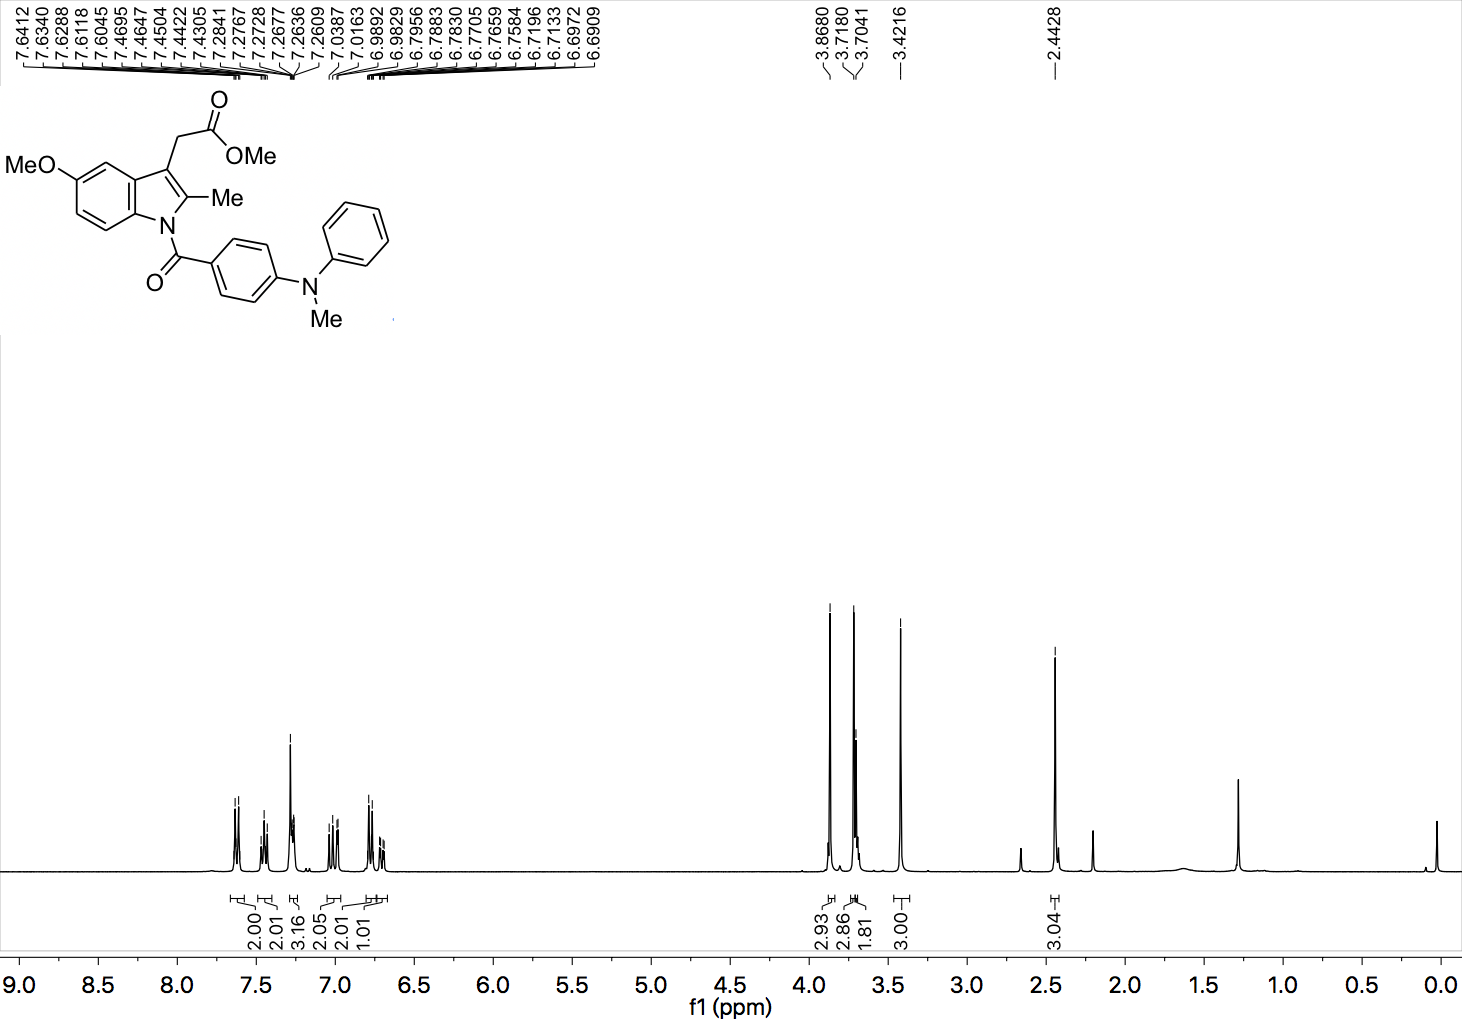


13C NMR (101 MHz, CDCl3) spectrum of **57**.


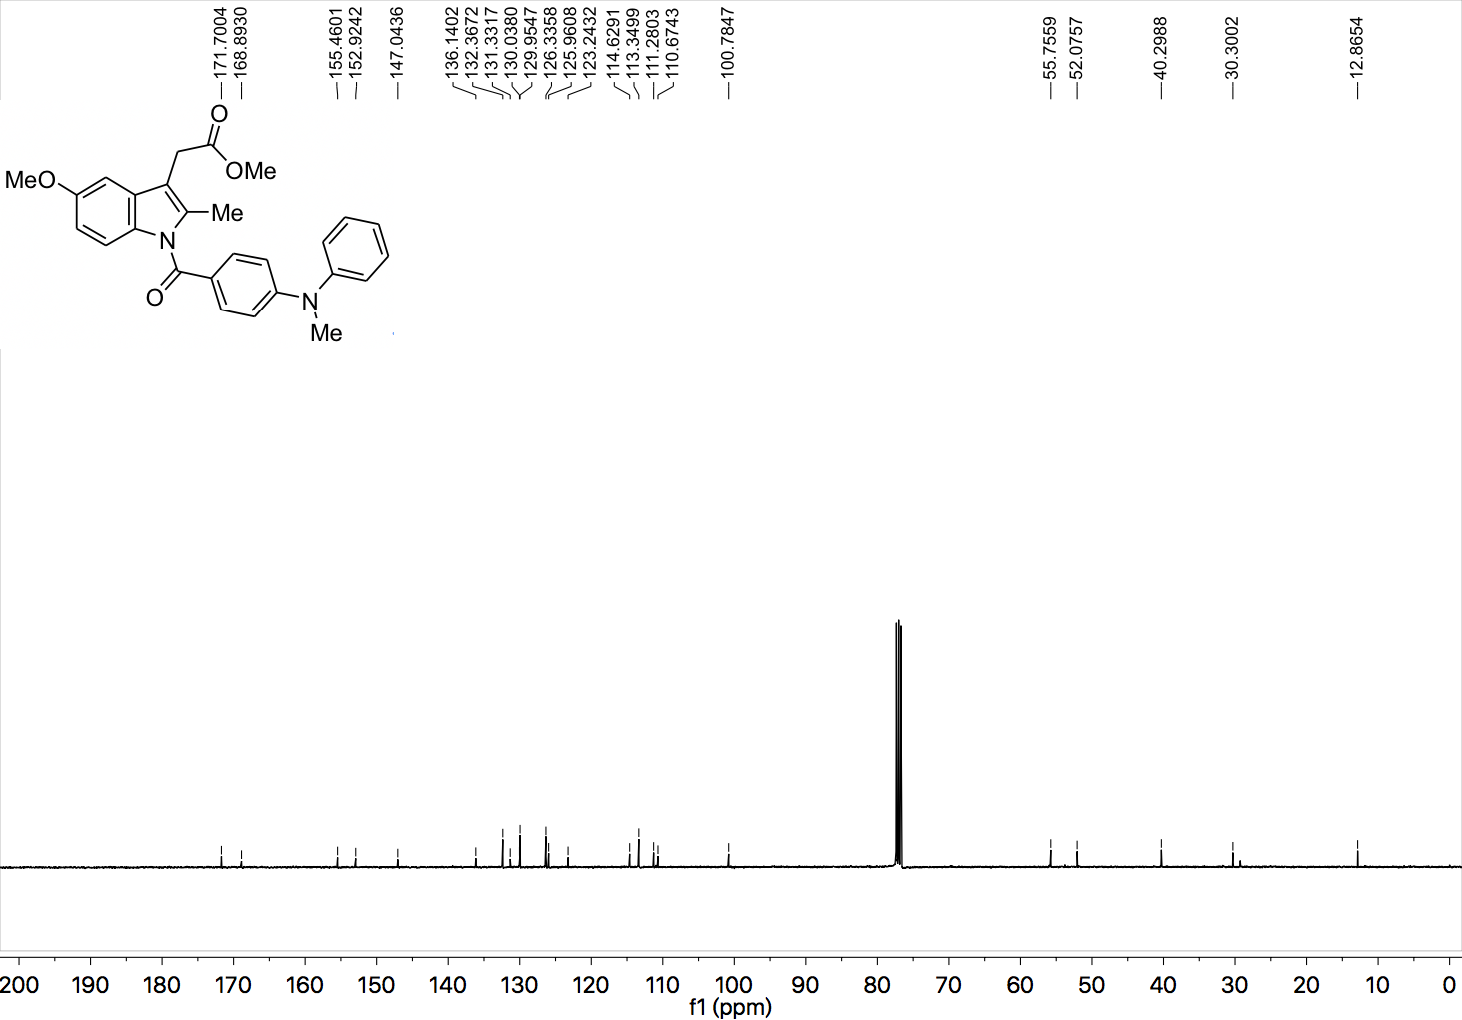


1H NMR (400 MHz, CDCl3) spectrum of **58**.


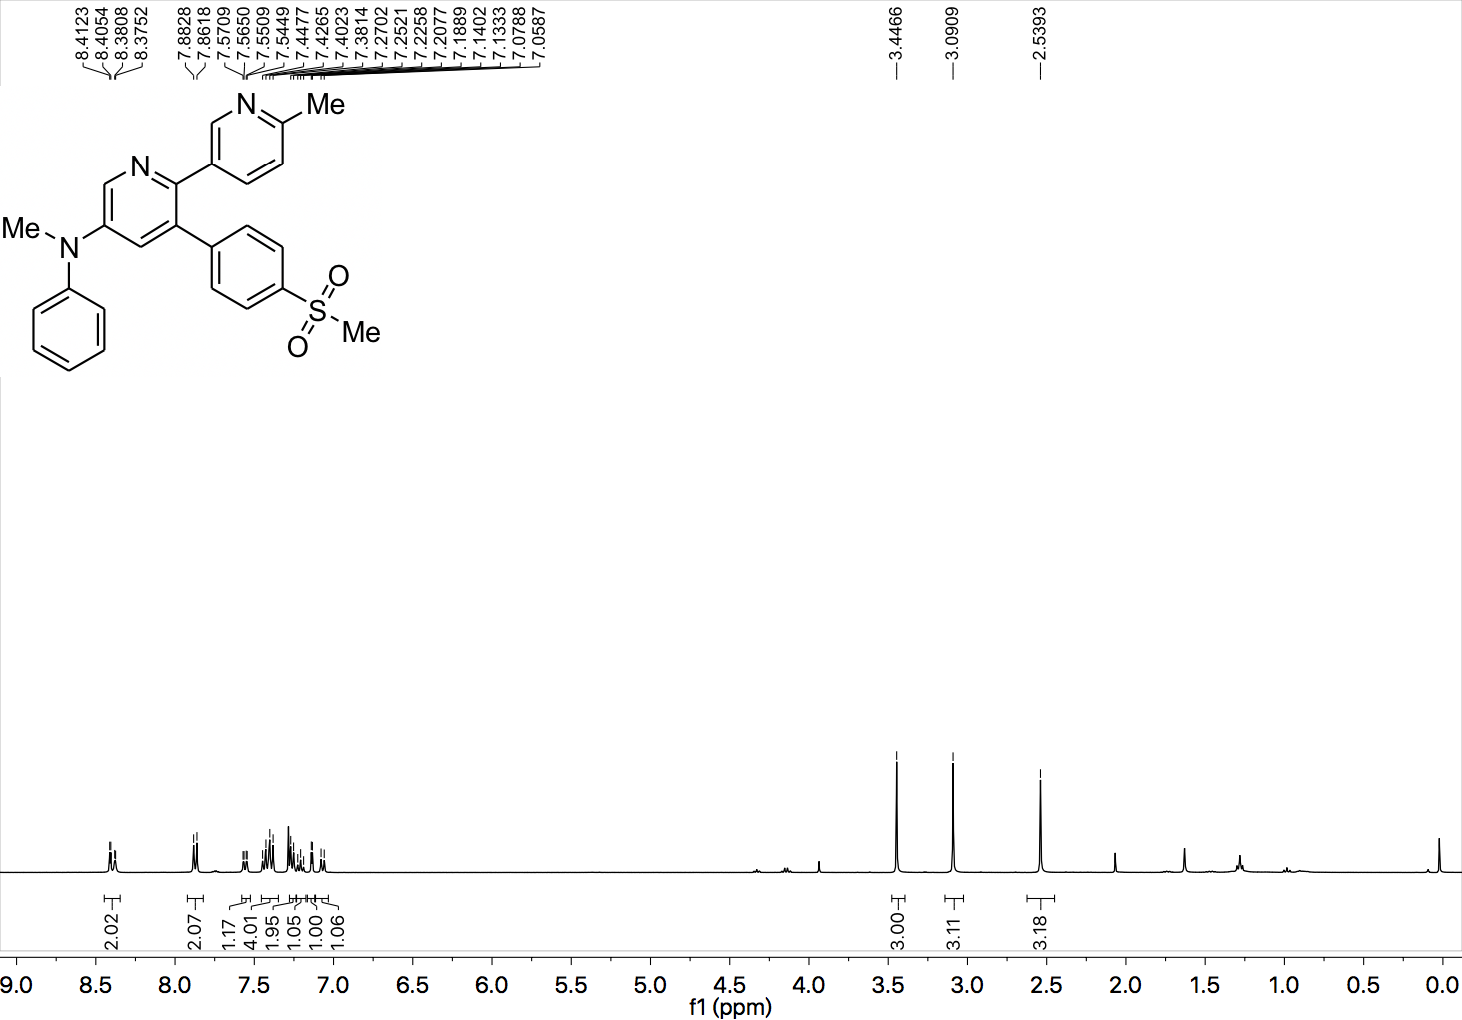


13C NMR (101 MHz, CDCl3) spectrum of **58**.


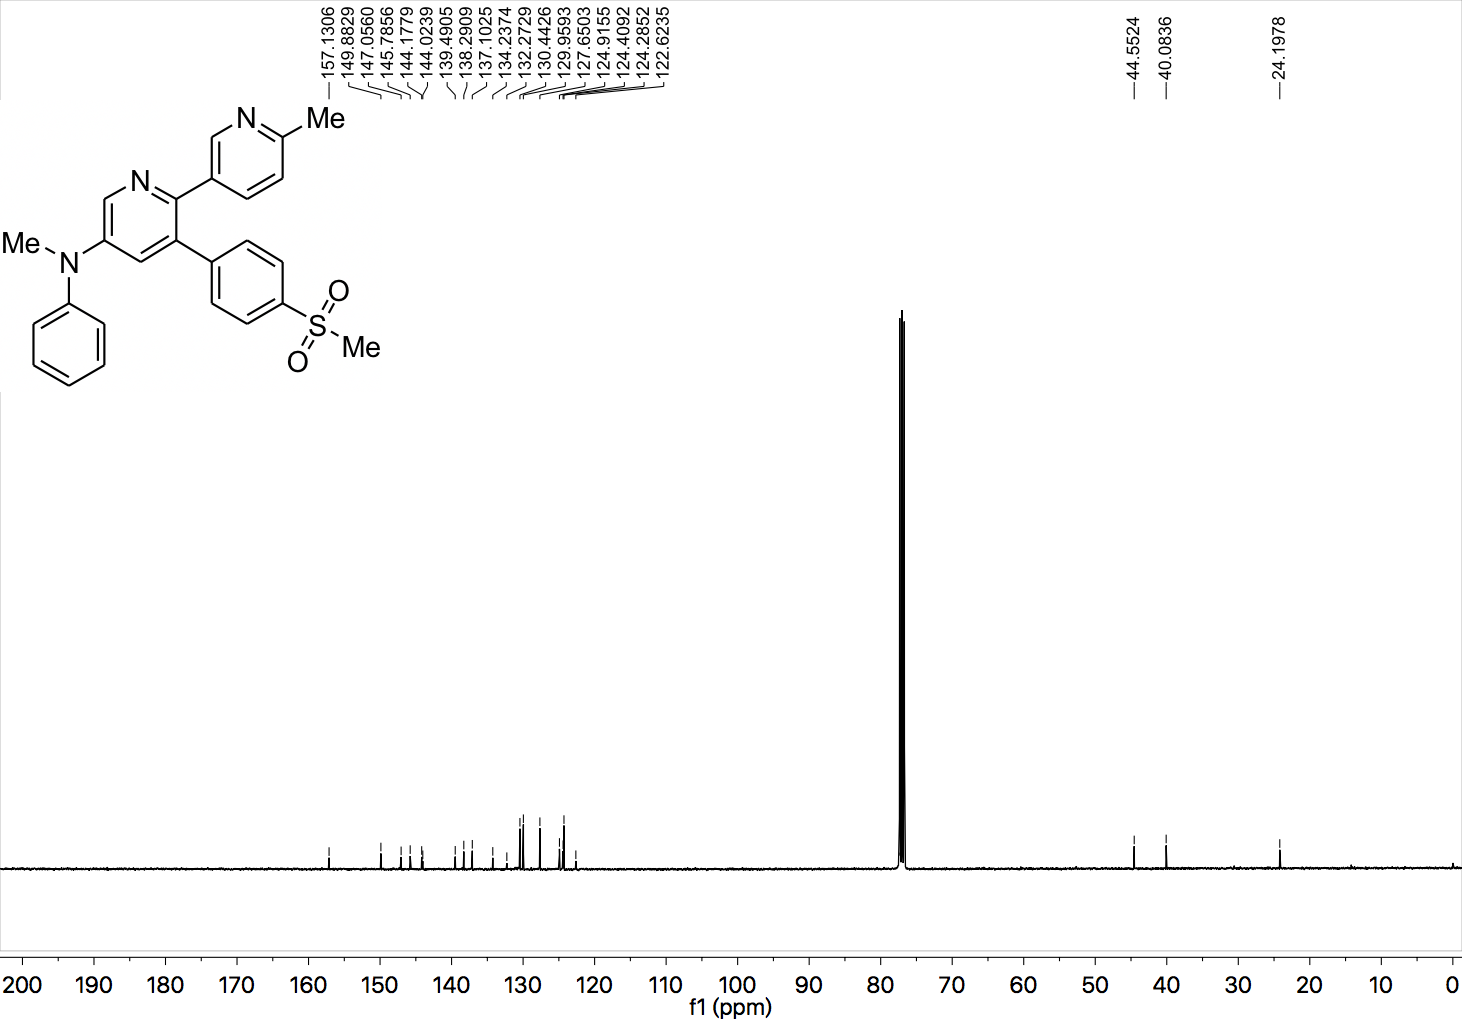

Supplement: Supplementary file 1 [file eea257742e3cf0be2b5073e7.docx]
